# Supplementary material
Source: Royal Society of Chemistry journal article supplement (doi:10.1039/d6qo00260a)
Supplement: d6qo00260a1.pdf [file d6qo00260a1.pdf]

## Supporting Information

### Theoretical Study on the Co<sup>II</sup>/Co<sup>III</sup> and Co<sup>II</sup>/Co<sup>IV</sup> Catalytic Cycles in Co<sup>II</sup>(salen)-Catalyzed Radical Fluorination with Various NF-Type Fluorinating Reagents

Jingwen Li<sup>a,c</sup>, Mong-Feng Chiou<sup>b,\*</sup>, Hongli Bao<sup>a,c,\*</sup>

<sup>a</sup>College of Chemistry, Fuzhou University, Fuzhou, Fujian 350108, China.

<sup>b</sup>Strait Laboratory of Flexible Electronics (SLoFE), Fujian Key Laboratory of Flexible Electronics, Strait Institute of Flexible Electronics (SIFE Future Technologies), Fujian Normal University, Fuzhou, Fujian 350117, China.

<sup>c</sup>State Key Laboratory of Structural Chemistry, Fujian Institute of Research on the Structure of Matter, Chinese Academy of Sciences, Fuzhou, Fujian 350002, China.

\*Correspondence to: [ifemfchiou@fjnu.edu.cn](mailto:ifemfchiou@fjnu.edu.cn); [hlbao@fjirsm.ac.cn](mailto:hlbao@fjirsm.ac.cn)

## Table of Contents

|                                                                                                                                                                                                                                                                                                                                                   |    |
|---------------------------------------------------------------------------------------------------------------------------------------------------------------------------------------------------------------------------------------------------------------------------------------------------------------------------------------------------|----|
| <b>Cramer-Truhlar correction for vibrational entropy terms</b> .....                                                                                                                                                                                                                                                                              | 4  |
| <b>Analysis of Counterion Dissociation Behavior and Feasibility of Fluorine Transfer Reaction</b> .....                                                                                                                                                                                                                                           | 4  |
| <b>Analyses of HOMO Eigenenergies, Orbital Configurations, and Electron Affinities of the fluorinating reagents at the Electronic Level</b> .....                                                                                                                                                                                                 | 5  |
| <b>The Non-innocent Behavior of the salen Ligand and Its Regulation of the Coordination Geometry of Cobalt Complexes</b> .....                                                                                                                                                                                                                    | 5  |
| <b>Possible competitive pathways for the fluorination reaction of benzyl radical 17</b> .....                                                                                                                                                                                                                                                     | 6  |
| <b>Fig. S1.</b> Free energy profile of $\text{Co}^{\text{II}}(\text{salen})$ reacting with the fluorinating reagent $[\text{Me}_3\text{NFPy}]^+$ calculated by using B3LYP-D3 (black line) and M06 (blue dash line) functionals. ....                                                                                                             | 7  |
| <b>Fig. S2.</b> Free energy profile of the formation pathway of alkyl radical <b>3</b> calculated by using B3LYP-D3 (black line) and M06 (blue dash line) functionals. ....                                                                                                                                                                       | 7  |
| <b>Fig. S3.</b> Free energy profile of $\text{Co}^{\text{II}}(\text{salen})$ reacting with the fluorinating reagent N-tert-butylfluoramidate calculated by using B3LYP-D3 (black line) and M06 (blue dash line) functionals. ....                                                                                                                 | 8  |
| <b>Fig. S4.</b> Free energy profile of the formation pathway of benzyl radical <b>13</b> via 1,5-HAT and the subsequent fluorination reaction pathway calculated by using B3LYP-D3 (black line) and M06 (blue dash line) functionals. ....                                                                                                        | 8  |
| <b>Fig. S5.</b> Relative free energies calculated with Cramer-Truhlar correction (red dash line) for the initial reaction of $\text{Co}^{\text{II}}(\text{salen})$ with $\text{Me}_3\text{NFPy}^+$ .....                                                                                                                                          | 9  |
| <b>Fig. S6.</b> Free energy profile of benzenium fluorination with $\text{BF}_4^-$ , $\text{PF}_6^-$ and $\text{OTf}^-$ anions. ....                                                                                                                                                                                                              | 9  |
| <b>Fig. S7.</b> RPESs of the counterpart of fluorinating reagent (a) $\text{Me}_3\text{NPy}$ and (b) $\text{PhSO}_2\text{N}(\text{Et})$ molecules moving away from the $\text{Co}(\text{salen})\text{-F}$ cluster.....                                                                                                                            | 10 |
| <b>Fig. S8.</b> Isosurfaces of HOMO (a) $\text{Me}_3\text{NPy}$ , (b) amidyl anion <b>15</b> and (c) $\text{PhSO}_2\text{N}(\text{Et})^-$ at 0.025 of isovalue. ....                                                                                                                                                                              | 10 |
| <b>Fig. S9.</b> The IRC paths of (a) $\text{Co}^{\text{II}}(\text{salen})\text{-H-SiR}_3$ and (b) $[\text{Co}^{\text{III}}(\text{salen})\text{-H-SiR}_3]^+$ corresponding to the intrinsic reaction potential surfaces of $\text{Co}^{\text{II}}(\text{salen})$ and $[\text{Co}^{\text{III}}(\text{salen})]^+$ directly reacting with silane..... | 10 |
| <b>Fig. S10.</b> a) Structure of the alkene coordinated to $\text{Co}^{\text{II}}(\text{salen})$ obtained from a constrained optimization fixing the $\text{Co-C1}$ bond length at 1.90 Å; b) Structure obtained after full unconstrained relaxation optimization of the entire molecule.....                                                     | 11 |
| <b>Fig. S11.</b> Optimized structure of benzenium ion <b>8</b> .....                                                                                                                                                                                                                                                                              | 11 |
| <b>Fig. S12.</b> Relative free energy diagram of the axial coordinated $\text{Co}(\text{salen})$ species by solvent 1,4-dioxane.....                                                                                                                                                                                                              | 11 |

|                                                                                                                                                                                                                                                                                                                                                                                                         |    |
|---------------------------------------------------------------------------------------------------------------------------------------------------------------------------------------------------------------------------------------------------------------------------------------------------------------------------------------------------------------------------------------------------------|----|
| <b>Fig. S13.</b> IRC path scan for the process of fluorine atom abstraction from $\text{Co}^{\text{IV}}(\text{salen})\text{-F}_2$ by benzyl radical <b>13</b> in the liquid phase. The results indicate a significantly low energy barrier at the saddle point for this reaction. ....                                                                                                                  | 12 |
| <b>Fig. S14.</b> 2D-RPES scan conducted on the red path segment shown in Fig. S13. The computational results indicate that although a transition state structure with a very small vibrational frequency may exist for this process, its thermodynamic and kinetic contributions can be considered negligible. ....                                                                                     | 12 |
| <b>Fig. S15.</b> Free energy profile for the ionic reaction pathway of $\text{Co}^{\text{II}}(\text{salen})$ -catalyzed fluorination of styrene <b>16</b> . ..                                                                                                                                                                                                                                          | 13 |
| <b>Fig. S16.</b> Free energy profile for the two fluorination reaction pathways of benzyl radical <b>17</b> . ....                                                                                                                                                                                                                                                                                      | 13 |
| <b>Table S1.</b> The relative free energies of $\text{Co}^{\text{II}}(\text{salen})$ , $[\text{Co}^{\text{IV}}(\text{salen})\text{-F}]^+$ , $[\text{Co}^{\text{IV}}(\text{salen})\text{-alkyl}]^+$ and $\text{Co}^{\text{IV}}(\text{salen})\text{-F}_2$ on each spin state. ....                                                                                                                        | 14 |
| <b>Table S2.</b> The relative free energies of $[\text{Co}^{\text{III}}(\text{salen})]^+$ , $\text{Co}^{\text{III}}(\text{salen})\text{-F}$ , $\text{Co}^{\text{III}}(\text{salen})\text{-H}$ and $\text{Co}^{\text{III}}(\text{salen})\text{-alkyl}$ on each spin state. ....                                                                                                                          | 14 |
| <b>Table S3.</b> Dissociation energies of fluorinating reagents $\text{Me}_3\text{NFPy}\text{-BF}_4$ , $\text{Me}_3\text{NFPy}\text{-OTf}$ and $\text{Me}_3\text{NFPy}\text{-PF}_6$ . ....                                                                                                                                                                                                              | 14 |
| <b>Table S4.</b> The NBO charges on the counterpart of two different fluorinating reagents and on the $\text{Co}(\text{salen})\text{-F}$ . ....                                                                                                                                                                                                                                                         | 14 |
| <b>Table S5.</b> The spin densities on the counterpart of two different fluorinating reagents and on the $\text{Co}(\text{salen})\text{-F}$ . ....                                                                                                                                                                                                                                                      | 14 |
| <b>Table S6.</b> Electronic populations and spin densities on d-orbital of Co atom in each $\text{Co}(\text{salen})$ species, and geometrical parameters as well. ....                                                                                                                                                                                                                                  | 15 |
| <b>Table S7.</b> Total charges and spin densities of selected atom and salen moiety in $\text{Co}^{\text{II}}(\text{salen})$ , $[\text{Co}^{\text{III}}(\text{salen})]^+$ , $\text{Co}^{\text{III}}(\text{salen})\text{-F}$ , and $[\text{Co}^{\text{IV}}(\text{salen})\text{-F}]^+$ .....                                                                                                              | 15 |
| <b>Table S8.</b> Electronic potential energies and correction to zero point energies, thermal energies, enthalpies, free energies (in Hartree) and imaginary frequencies ( $\text{cm}^{-1}$ ) of optimized structures calculated at the B3LYP-D3/Def2-TZVP (SMD-custom solvent-dielectric constant $\epsilon$ =9.2) // B3LYP-D3/Def2-SVP (SMD-custom solvent- dielectric constant $\epsilon$ =9.2)..... | 16 |
| <b>Table S9.</b> Electronic potential energies and correction to zero point energies, thermal energies, enthalpies, free energies (in Hartree) and imaginary frequencies ( $\text{cm}^{-1}$ ) of optimized structures calculated at the B3LYP-D3/Def2-TZVP (SMD-1,4-Dioxane) // B3LYP-D3/Def2-SVP (SMD-1,4-Dioxane).....                                                                                | 20 |
| <b>Table S10.</b> Electronic potential energies and correction to zero point energies, thermal energies, enthalpies, free energies (in Hartree) and imaginary frequencies ( $\text{cm}^{-1}$ ) of optimized structures calculated at the B3LYP-D3/Def2-TZVP (SMD-EthylEthanoate) // B3LYP-D3/Def2-SVP (SMD-EthylEthanoate). ....                                                                        | 22 |

### Cramer-Truhlar correction for vibrational entropy terms

In this study, structural optimization procedure inherently employs the SMD implicit solvation model including vibrational analysis. According to the report by Cramer and Truhlar et al. in *J. Phys. Chem. B*, **2011**, *115*, 14556, they assert that the free energy obtained through such a computational method is appropriate, as statement in the article: "When molecular free energies are defined to include free energy contributions from nuclear motion, it may sometimes be more consistent with parametrization history to determine these contributions from gas-phase partition functions, but it is not 'incorrect' to employ instead partition functions for structures that are stationary points in solution."

Nevertheless, following the recommended practice, we have scaled all vibrational frequencies lower than 100 cm<sup>-1</sup> raised to 100 cm<sup>-1</sup> for the initial reaction of Co<sup>II</sup>(salen) with Me<sub>3</sub>NFPy<sup>+</sup>. This correction addresses the well-known breakdown of the harmonic oscillator model in the free energy calculation for low-frequency vibrational modes. The partition functions were subsequently recalculated to obtain the corrected vibrational entropy terms.

$$S_{vib,i} = R \left[ \frac{x_i}{e^{x_i} - 1} - \ln(1 - e^{-x_i}) \right]; \text{ for frequency } v_i$$

$$\text{in which } x_i = \frac{hcv_i}{kT} \approx \frac{1.4388v_i}{T}; \frac{hc}{k} = 1.4388 \text{ (K}\cdot\text{cm)}; R = 1.987 \text{ cal}/(\text{mol}\cdot\text{K})$$

Based on the Cramer-Truhlar correction, the calculated relative free energies are in excellent agreement with original energy profile (Fig. S5). This are attributed to the fact that the number of vibrational modes below 100 cm<sup>-1</sup> in the structures of the bimolecular reactions (e.g., <sup>2</sup>TS1, <sup>2</sup>INT1) does not exhibit an unreasonable increase. Therefore, we conclude that the findings of this study are reliable.

| Intermediate                              | S <sub>vib</sub> in out file<br>(cal/mol • K) | Corrected S <sub>vib</sub><br>(cal/mol • K) | T Δ S(Kcal/mol) | Number of<br>freq. < 100 cm <sup>-1</sup> |
|-------------------------------------------|-----------------------------------------------|---------------------------------------------|-----------------|-------------------------------------------|
| Co <sup>II</sup> (salen)                  | 155.80                                        | 138.97                                      | 5.02            | 11                                        |
| Me <sub>3</sub> NFPy <sup>+</sup>         | 32.57                                         | 26.70                                       | 1.75            | 1                                         |
| <sup>2</sup> TS1                          | 207.56                                        | 182.88                                      | 7.36            | 16                                        |
| <sup>2</sup> INT1                         | 212.91                                        | 186.31                                      | 7.93            | 17                                        |
| Co <sup>III</sup> (salen)-F               | 161.72                                        | 144.38                                      | 5.16            | 11                                        |
| Me <sub>3</sub> NPy <sup>+</sup>          | 30.67                                         | 27.03                                       | 1.09            | 3                                         |
| [Co <sup>IV</sup> (salen)-F] <sup>+</sup> | 162.27                                        | 145.14                                      | 5.11            | 11                                        |
| Me <sub>3</sub> NPy                       | 29.79                                         | 24.72                                       | 1.51            | 3                                         |

### Analysis of Counterion Dissociation Behavior and Feasibility of Fluorine Transfer Reaction

The counterions PF<sub>6</sub><sup>-</sup> and OTf<sup>-</sup> were also examined to understand their behavior in solution. The computed results are summarized in Table S3. The results show that regardless of the counterion, Me<sub>3</sub>NFPy<sup>+</sup> tends to dissociate in solution.

On the other hand, according to the experimental condition screening reported by Hiroya et al. in *Org. Lett.*, **2013**, *15*, 5158, the use of Me<sub>3</sub>NFPy-OTf (i.e., **F2**) as a fluorinating reagent yielded 0% product. This experimental result indeed provides critical support for our study, further corroborating that the reaction likely proceeds via a benzenium fluorination pathway. In addition,

the process of fluorine transfer from  $\text{PF}_6^-$  or  $\text{OTf}^-$  anions to the benzenium ion was also computationally analyzed. The results show that the reaction with the  $\text{OTf}^-$  anion exhibits a high energy barrier of 26.6 kcal/mol, and the product formation free energy is 19.6 kcal/mol, indicating that are both kinetically and thermodynamically unfavorable (see Fig. S6). Although no experimental data are available for using  $\text{Me}_3\text{NPy}\cdot\text{PF}_6$  as reagent, we believe that the reaction should be accessible if the counterion is  $\text{PF}_6^-$ .

### Analyses of HOMO Eigenenergies, Orbital Configurations, and Electron Affinities of the fluorinating reagents at the Electronic Level

To further understand the electron affinity of the counterpart of different NF-type fluorinating reagents after fluorine transfer to  $\text{Co}^{\text{II}}(\text{salen})$ , the HOMO eigenenergies of  $\text{Me}_3\text{NPy}$ , N-tBu-amidyl anion (**15**) and  $\text{PhSO}_2\text{N}(\text{Et})^-$ , as well as the  $\beta$ -SOMO eigenenergies corresponding to single-electron loss, were examined. The HOMO and  $\beta$ -SOMO eigenenergies are -0.25128, -0.12151 and -0.16397 hartree and -0.23568, -0.12232 and -0.14521 hartree, respectively. According to Koopmans' theorem, the first ionization energy of a closed-shell molecule approximates the eigenenergy of its HOMO. Although DFT may introduce errors due to inaccuracies in the exchange–correlation functional, it is still evident that the electron affinity of  $\text{Me}_3\text{NPy}^+$  is significantly greater than that of **12** and  $\text{PhSO}_2\text{N}(\text{Et})$ . This is because the HOMO of  $\text{Me}_3\text{NPy}$  is a  $\pi$  orbital delocalized on the pyridine ring, analogous to that of benzene, whereas the HOMOs of the other two counterparts of neutral reagents are localized on the amide moiety and even exhibit  $\pi$ -antibonding character with the phenyl ring of the benzyl group (see Fig. S8). Consequently,  $\text{Me}_3\text{NPy}^+$  possesses the highest electron affinity. In addition, the electronic energy difference for each species upon gaining or losing an electron was also computationally analyzed, as listed below. Although the ligands and solvents differ in these  $\text{Co}(\text{salen})\text{-F}$  systems, the electron binding energy is approximately  $\sim 130$  kcal/mol, clearly indicating that  $\text{Me}_3\text{NPy}^+$  is more capable to oxidize  $\text{Co}^{\text{III}}(\text{salen})\text{-F}$ .

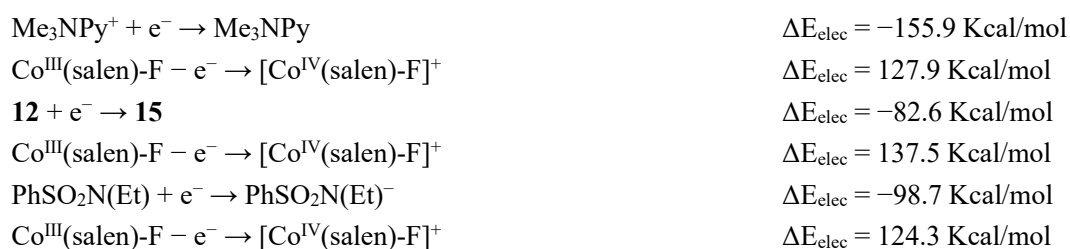

### The Non-innocent Behavior of the salen Ligand and Its Regulation of the Coordination Geometry of Cobalt Complexes

Due to the conjugation between the diimine moiety of the salen ligand and the phenolate groups, the structure is essentially slightly rigid. Consequently,  $\text{Co}^{\text{II}}(\text{salen})$  adopts a nearly square-planar coordination geometry (Table S6). To further understand how the salen ligand modulates charge distribution during fluorination and oxidation, a detailed analysis was performed on the cobalt d-orbital electron populations, spin densities, and several key geometric parameters for  $\text{Co}^{\text{II}}(\text{salen})$  versus  $[\text{Co}^{\text{III}}(\text{salen})]^+$ , as well as for  $\text{Co}^{\text{III}}(\text{salen})\text{-F}$  versus  $[\text{Co}^{\text{IV}}(\text{salen})\text{-F}]^+$ . According to the ligand-field theory, the d-orbitals in a square-planar coordination field should split as shown in Table S6. Because the  $d_{xy}$  orbital is sigma antibonding ( $\sigma^*$ ), it contains few electrons and lies at a higher energy, rendering  $\text{Co}^{\text{II}}(\text{salen})$  a low-spin doublet state. The  $dx^2-y^2$  orbital, located between all Co–

X (X = O, N) bonds, is non-bonding and therefore lowest in energy; it is always almost occupied by approximately two electrons from the cobalt  $d^7$  configuration. Since the ONNO coordination of salen is not equivalent, the symmetric  $dz^2$  and  $dxz$  orbitals form pi antibonding orbitals ( $\pi^*$ ) that are higher in energy than the  $dyz$   $\pi^*$  orbital, although all  $\pi^*$  orbitals lie close in energy. The electron populations and spin densities listed in Table S6 reveal that the spin densities on the  $dz^2$  and  $dxz$  orbitals increase and the total electron count decreases when CoII(salen) loses one electron to form  $[\text{Co}^{\text{III}}(\text{salen})]^+$ , while the square-planar coordination geometry remains largely unchanged. Combined with the data in Table S7, it can be seen that upon oxidation to  $[\text{Co}^{\text{III}}(\text{salen})]^+$ , the salen ligand itself carries only a small net positive charge but accommodates a portion of the spin density, which is primarily localized on the oxygen atoms and carbons (not listed in Table S7) of phenolic moieties. Because the antibonding  $\pi^*$  character formed by  $dxz$  orbital loses electron density, the Co–O bond lengths shorten slightly.

On the other hand, when an F atom coordinates at the axial position to form  $\text{Co}^{\text{III}}(\text{salen})\text{-F}$ , although the  $dz^2$  orbital becomes a sigma antibonding ( $\sigma^*$ ) orbital, the pi antibonding ( $\pi^*$ ) orbitals ( $dxz$ ,  $dyz$ ) remain close in energy to the  $dz^2$   $\sigma^*$  orbital due to the presence of the F atom with lone pairs electrons. Comparing the d-orbital electron populations and spin densities of  $\text{Co}^{\text{II}}(\text{salen})$  and  $\text{Co}^{\text{III}}(\text{salen})\text{-F}$ , it can be seen that the change in the  $dxz$  orbital is minimal, whereas the electron population in the  $dz^2$  orbital further decreases and its spin density increases. Furthermore, upon oxidation to  $[\text{Co}^{\text{IV}}(\text{salen})\text{-F}]^+$ , the electron loss clearly occurs from the  $dyz$  orbital resulting in quartet state. Furthermore, comparing the structures of  $\text{Co}^{\text{III}}(\text{salen})\text{-F}$  and  $[\text{Co}^{\text{IV}}(\text{salen})\text{-F}]^+$  with that of  $\text{Co}^{\text{II}}(\text{salen})$  reveals that the  $\angle(\text{N}2\text{-Co-O}1)$  angle decreases significantly, and the dihedral angle  $\text{D}(\text{O}1\text{-N}1\text{-N}2\text{-O}2)$  gradually increases. Upon the formation of  $[\text{Co}^{\text{IV}}(\text{salen})\text{-F}]^+$ , the bond lengths of  $d(\text{Co-O}2)$  and  $d(\text{Co-N}2)$  are further elongated. This indicates that the coordination geometry tends to shift toward a trigonal bipyramidal rather than a square pyramidal structure, although the inherent rigidity of the salen ligand prevents a more substantial distortion. Combining the analyses of charge distribution and spin density on the ligand reveal that in both  $\text{Co}^{\text{III}}(\text{salen})\text{-F}$  and  $[\text{Co}^{\text{IV}}(\text{salen})\text{-F}]^+$ , the spin density on the salen ligand is no longer close to zero. Similar to the case in  $[\text{Co}^{\text{III}}(\text{salen})]^+$ , a greater proportion of the unpaired electron density is delocalized onto the phenolic moieties. This disrupts the conjugation between the imine and phenolate groups, allowing rotation around the connecting C–C bond and thereby facilitating the adoption of a trigonal bipyramidal geometry. These results indicate that the salen ligand is a non-innocent ligand since the phenolate groups can accommodate spin density to adopt the trigonal bipyramidal geometry slightly.

### Possible competitive pathways for the fluorination reaction of benzyl radical **17**

A potential competitive pathway for the fluorination of benzyl radical **17**, namely the fluorination reaction pathway involving carbocation **19**, was also computationally analyzed (see Fig. S15 for details). The results show that although the dissociation of intermediate  $^4\text{INT11}$  to form  $[\text{Co}^{\text{II}}(\text{salen})\text{-F}]^-$  and the nitrogen cation  $\text{PhSO}_2\text{N}^+(\text{Et})$  is slightly lower in Gibbs free energy of formation (by approximately 0.7 kcal/mol, pink pathway) compared to the formation of  $[\text{Co}^{\text{III}}(\text{salen})\text{-F}]^+$  and  $\text{PhSO}_2\text{N}^+(\text{Et})$ , the transition state  $^1\text{TS25}$  for generating carbocation **19** in the subsequent reaction pathway has an energy barrier approximately 25.8 kcal/mol higher than that of transition state  $^2\text{TS22}$  for generating benzyl radical **17**. This indicates that, kinetically, the radical reaction pathway remains more favorable.

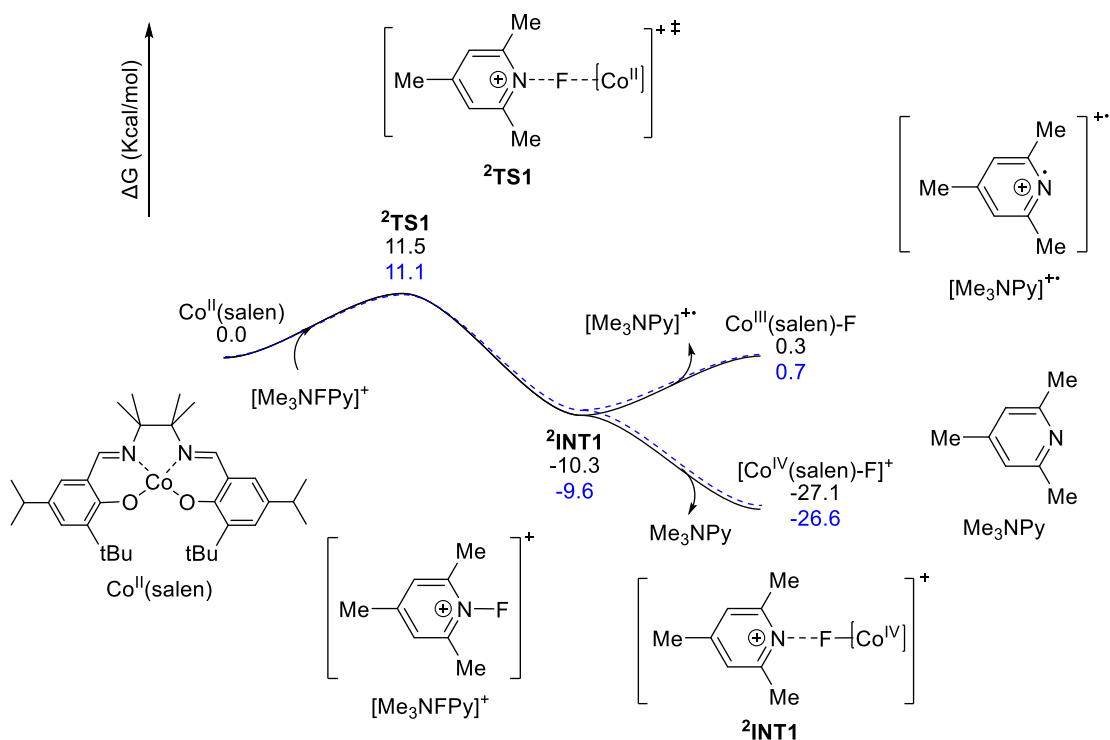

**Fig. S1.** Free energy profile of  $\text{Co}^{\text{II}}(\text{salen})$  reacting with the fluorinating reagent  $[\text{Me}_3\text{NFPy}]^+$  calculated by using B3LYP-D3 (black line) and M06 (blue dash line) functionals.

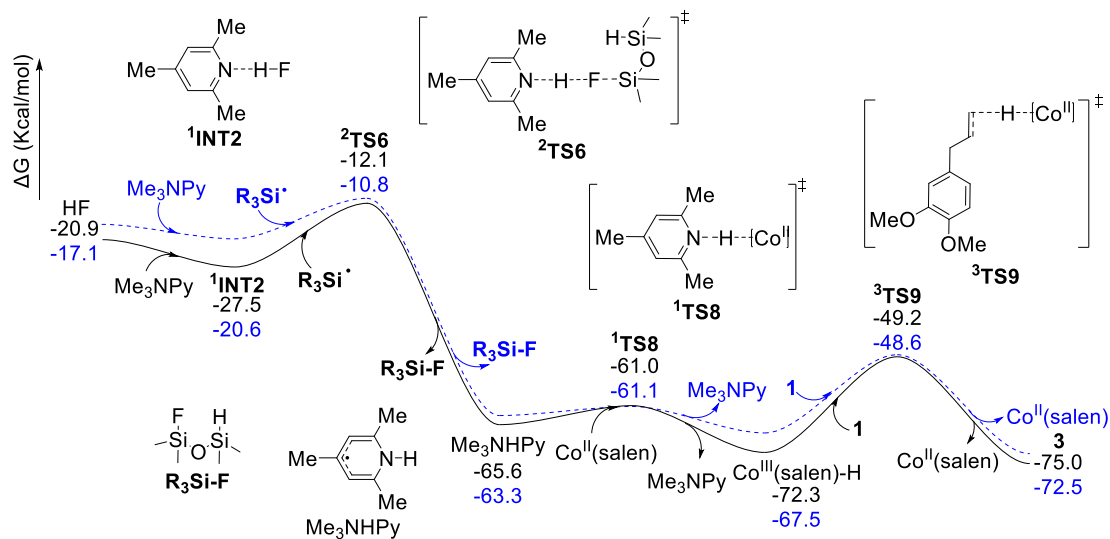

**Fig. S2.** Free energy profile of the formation pathway of alkyl radical **3** calculated by using B3LYP-D3 (black line) and M06 (blue dash line) functionals.

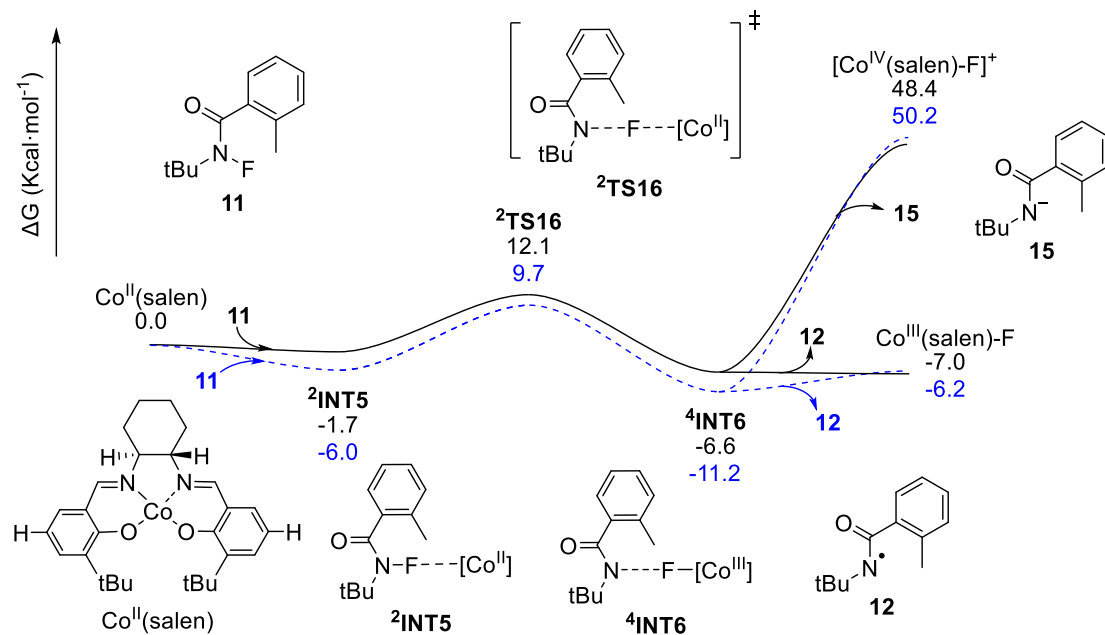

**Fig. S3.** Free energy profile of  $\text{Co}^{\text{II}}(\text{salen})$  reacting with the fluorinating reagent N-tert-butylfluoramide calculated by using B3LYP-D3 (black line) and M06 (blue dash line) functionals.

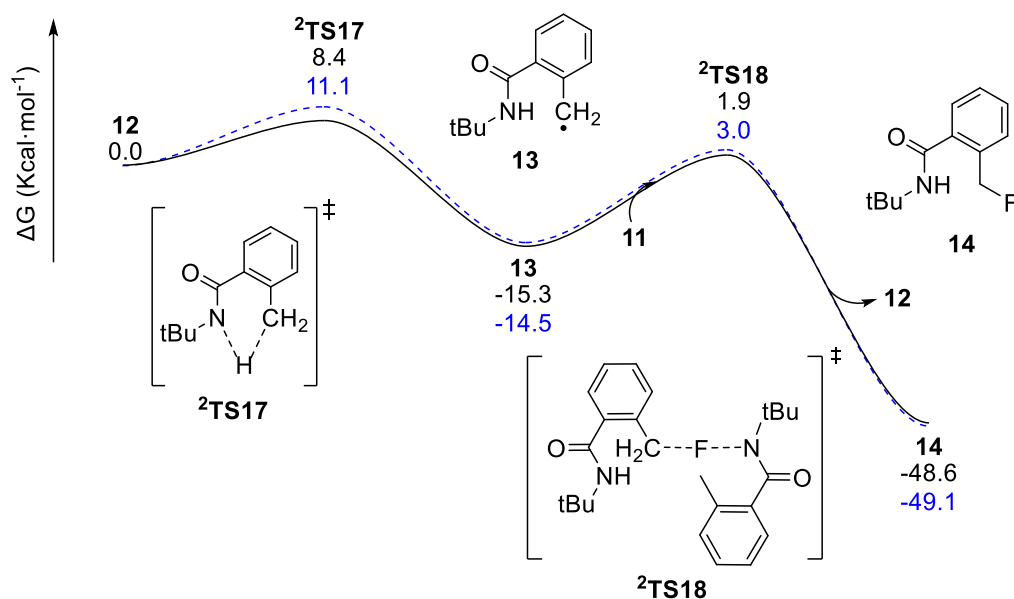

**Fig. S4.** Free energy profile of the formation pathway of benzyl radical **13** via 1,5-HAT and the subsequent fluorination reaction pathway calculated by using B3LYP-D3 (black line) and M06 (blue dash line) functionals.

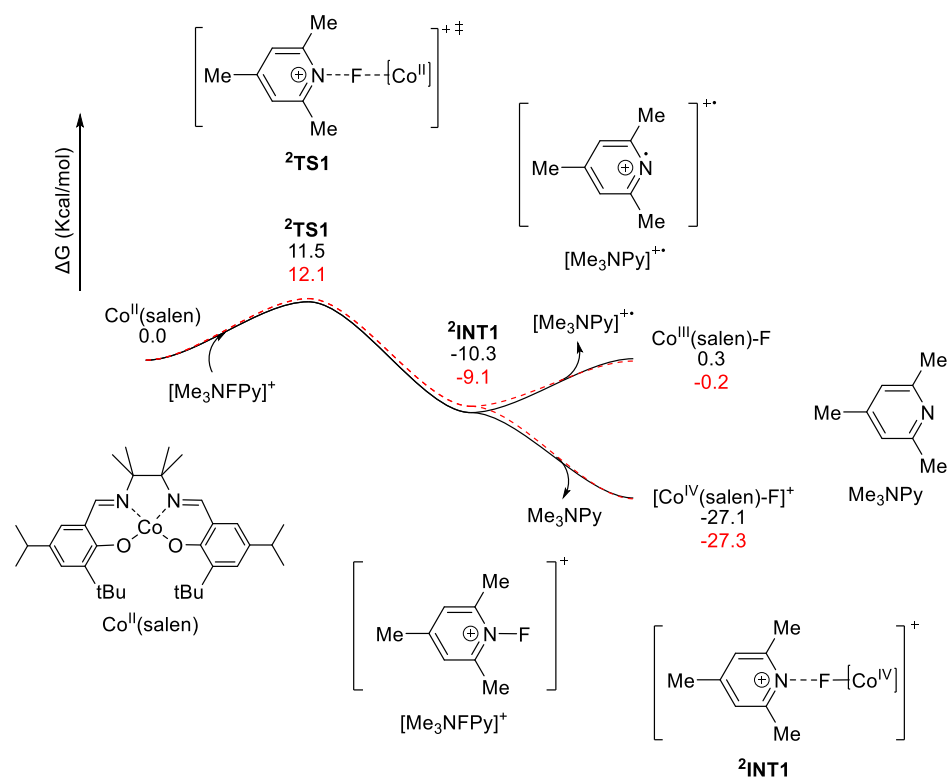

**Fig. S5.** Relative free energies calculated with Cramer-Truhlar correction (red dash line) for the initial reaction of  $\text{Co}^{\text{II}}(\text{salen})$  with  $\text{Me}_3\text{NFPy}^+$ .

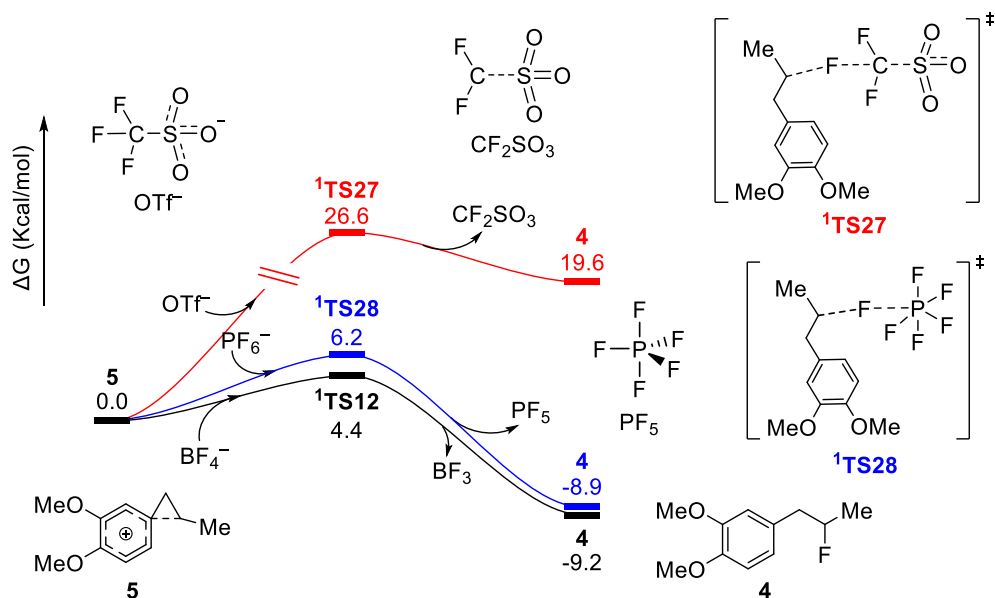

**Fig. S6.** Free energy profile of benzenium fluorination with  $\text{BF}_4^-$ ,  $\text{PF}_6^-$  and  $\text{OTf}^-$  anions.

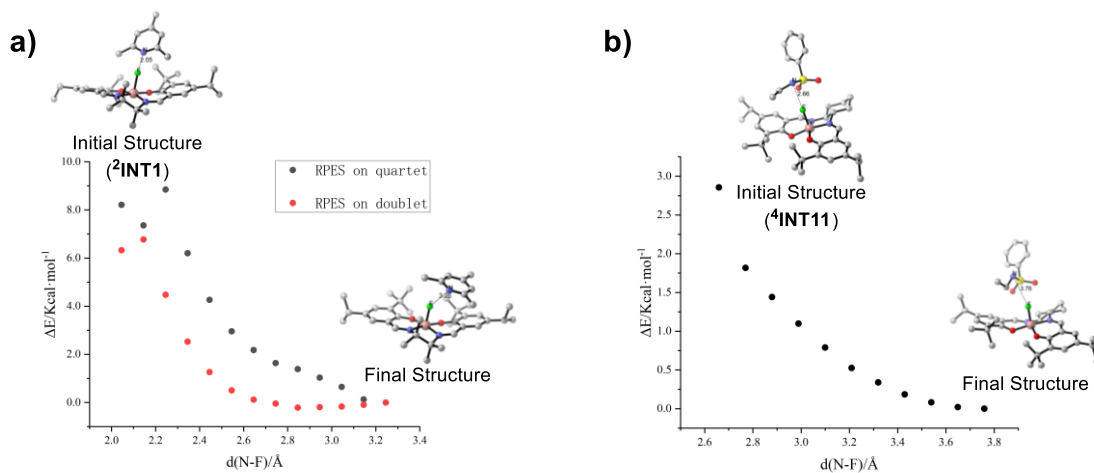

**Fig. S7.** RPESs of the counterpart of fluorinating reagent (a)  $\text{Me}_3\text{NPy}$  and (b)  $\text{PhSO}_2\text{N}(\text{Et})$  molecules moving away from the  $\text{Co}(\text{salen})\text{-F}$  cluster.

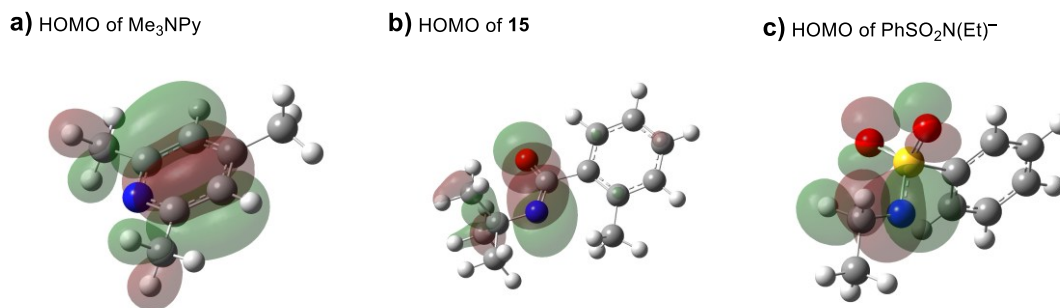

**Fig. S8.** Isosurfaces of HOMO (a)  $\text{Me}_3\text{NPy}$ , (b) amidyl anion **15** and (c)  $\text{PhSO}_2\text{N}(\text{Et})^-$  at 0.025 of isovalue.

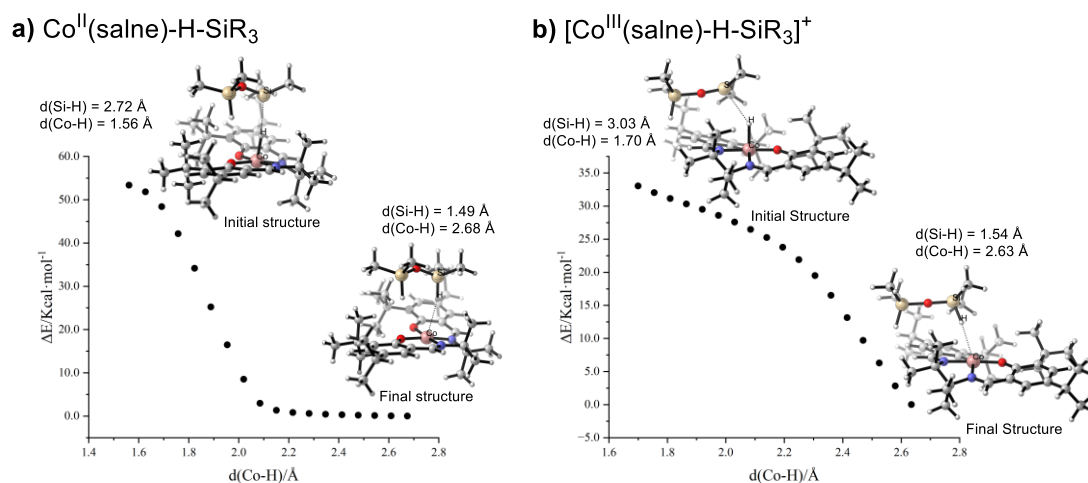

**Fig. S9.** The IRC paths of (a)  $\text{Co}^{\text{II}}(\text{salen})\text{-H-SiR}_3$  and (b)  $[\text{Co}^{\text{III}}(\text{salen})\text{-H-SiR}_3]^+$  corresponding to the intrinsic reaction potential surfaces of  $\text{Co}^{\text{II}}(\text{salen})$  and  $[\text{Co}^{\text{III}}(\text{salen})]^+$  directly reacting with silane.

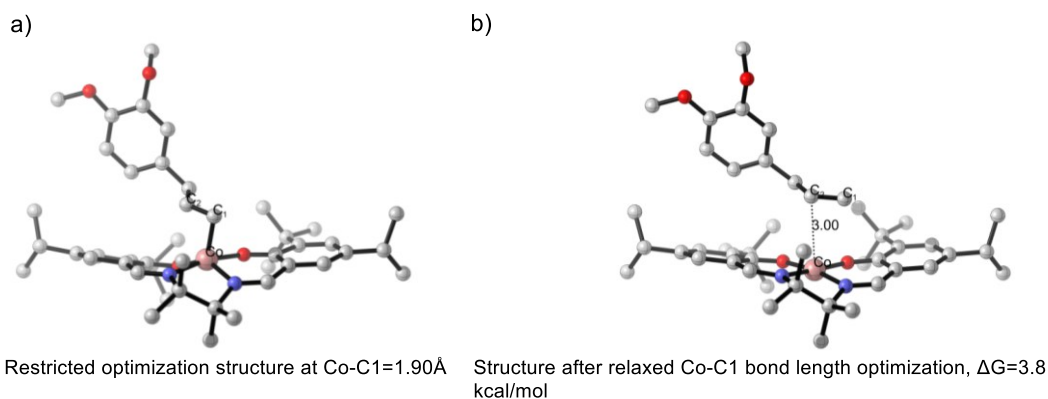

**Fig. S10.** a) Structure of the alkene coordinated to  $\text{Co}^{\text{II}}(\text{salen})$  obtained from a constrained optimization fixing the Co-C1 bond length at 1.90 Å; b) Structure obtained after full unconstrained relaxation optimization of the entire molecule.

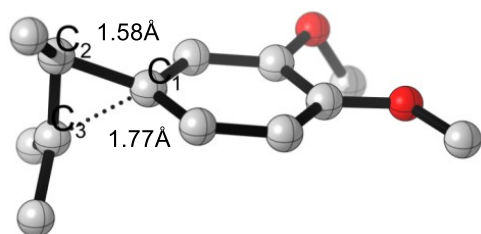

**Fig. S11.** Optimized structure of benzenium ion **8**.

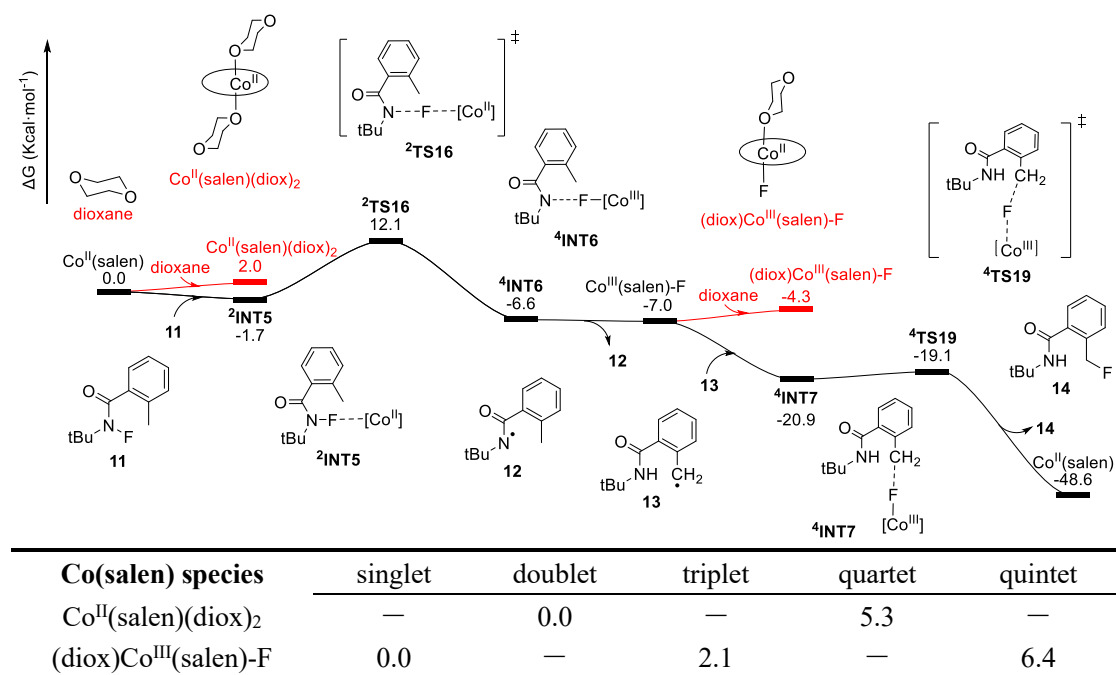

**Fig. S12.** Relative free energy diagram of the axial coordinated  $\text{Co}(\text{salen})$  species by solvent 1,4-dioxane.

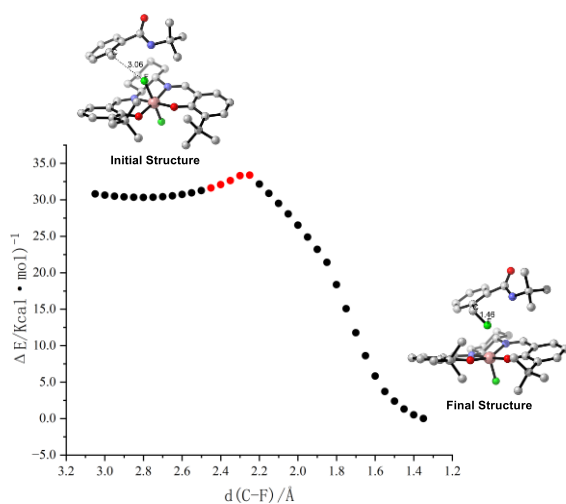

**Fig. S13.** IRC path scan for the process of fluorine atom abstraction from  $\text{Co}^{\text{IV}}(\text{salen})\text{-F}_2$  by benzyl radical **13** in the liquid phase. The results indicate a significantly low energy barrier at the saddle point for this reaction.

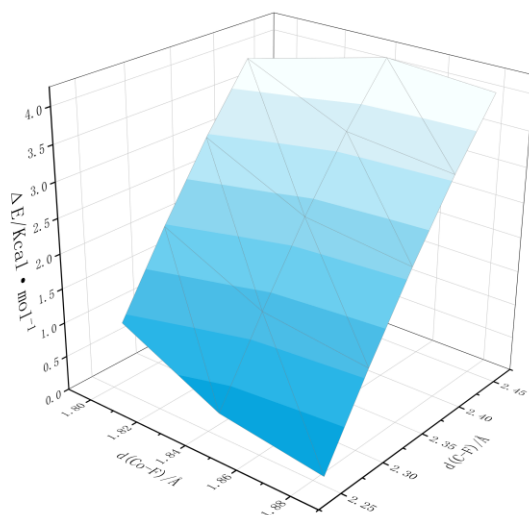

**Fig. S14.** 2D-RPES scan conducted on the red path segment shown in Fig. S13. The computational results indicate that although a transition state structure with a very small vibrational frequency may exist for this process, its thermodynamic and kinetic contributions can be considered negligible.

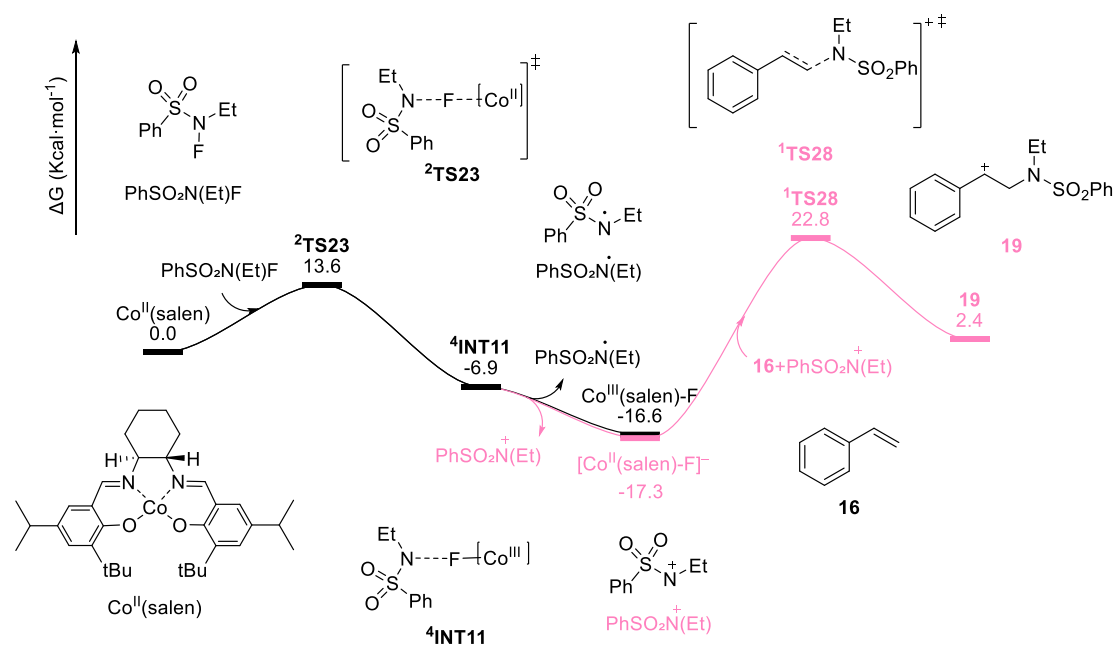

**Fig. S15.** Free energy profile for the ionic reaction pathway of Co<sup>II</sup>(salen)-catalyzed fluorination of styrene **16**.

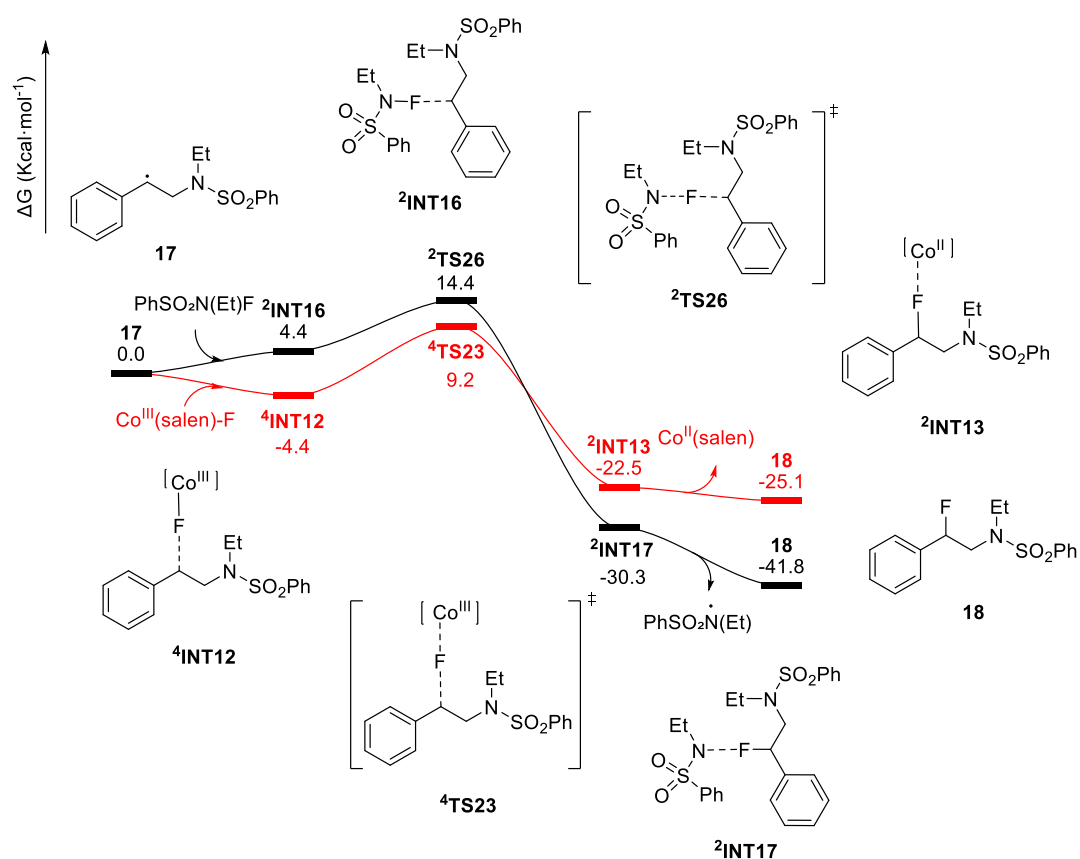

**Fig. S16.** Free energy profile for the two fluorination reaction pathways of benzyl radical **17**.

**Table S1.** The relative free energies of  $\text{Co}^{\text{II}}(\text{salen})$ ,  $[\text{Co}^{\text{IV}}(\text{salen})\text{-F}]^+$ ,  $[\text{Co}^{\text{IV}}(\text{salen})\text{-alkyl}]^+$  and  $\text{Co}^{\text{IV}}(\text{salen})\text{-F}_2$  on each spin state.

| <b>Co(salen) species</b>                               | <b>doublet</b> | <b>quartet</b> | <b>sextet</b> |
|--------------------------------------------------------|----------------|----------------|---------------|
| $\text{Co}^{\text{II}}(\text{salen})$                  | 0.0            | 4.1            | -             |
| $[\text{Co}^{\text{IV}}(\text{salen})\text{-F}]^+$     | 1.9            | 0.0            | 1.1           |
| $[\text{Co}^{\text{IV}}(\text{salen})\text{-alkyl}]^+$ | 0.0            | 7.6            | 18.9          |
| $\text{Co}^{\text{IV}}(\text{salen})\text{-F}_2$       | 0.0            | 15.9           | 14.3          |

**Table S2.** The relative free energies of  $[\text{Co}^{\text{III}}(\text{salen})]^+$ ,  $\text{Co}^{\text{III}}(\text{salen})\text{-F}$ ,  $\text{Co}^{\text{III}}(\text{salen})\text{-H}$  and  $\text{Co}^{\text{III}}(\text{salen})\text{-alkyl}$  on each spin state.

| <b>Co(salen) species</b>                            | <b>singlet</b> | <b>triplet</b> | <b>quintet</b> |
|-----------------------------------------------------|----------------|----------------|----------------|
| $[\text{Co}^{\text{III}}(\text{salen})]^+$          | 16.5           | 0.0            | 8.7            |
| $\text{Co}^{\text{III}}(\text{salen})\text{-F}$     | 7.4            | 0.0            | 2.0            |
| $\text{Co}^{\text{III}}(\text{salen})\text{-H}$     | 0.0            | 14.0           | 24.8           |
| $\text{Co}^{\text{III}}(\text{salen})\text{-alkyl}$ | 0.0            | 6.6            | 10.9           |

**Table S3.** Dissociation energies of fluorinating reagents  $\text{Me}_3\text{NFPy}\cdot\text{BF}_4$ ,  $\text{Me}_3\text{NFPy}\cdot\text{OTf}$  and  $\text{Me}_3\text{NFPy}\cdot\text{PF}_6$ .

|                                                                                               | $\Delta G / \text{Kcal}\cdot\text{mol}^{-1}$ |
|-----------------------------------------------------------------------------------------------|----------------------------------------------|
| $\text{Me}_3\text{NFPy}\cdot\text{BF}_4 \rightarrow \text{Me}_3\text{NFPy}^+ + \text{BF}_4^-$ | -0.9                                         |
| $\text{Me}_3\text{NFPy}\cdot\text{OTf} \rightarrow \text{Me}_3\text{NFPy}^+ + \text{OTf}^-$   | -3.3                                         |
| $\text{Me}_3\text{NFPy}\cdot\text{PF}_6 \rightarrow \text{Me}_3\text{NFPy}^+ + \text{PF}_6^-$ | -3.1                                         |

**Table S4.** The NBO charges on the counterpart of two different fluorinating reagents and on the  $\text{Co}(\text{salen})\text{-F}$ .

| <b>Intermediate</b>                                | <b><sup>2</sup>TS1</b>  | <b><sup>2</sup>INT1</b>  | <b>6<sup>th</sup> point</b> | <b>Final point at doublet/quartet</b> |
|----------------------------------------------------|-------------------------|--------------------------|-----------------------------|---------------------------------------|
| $\text{Me}_3\text{NPy}$                            | 1.01                    | 0.69                     | 0.01                        | 0.01 / 0.00                           |
| $[\text{Co}^{\text{IV}}(\text{salen})\text{-F}]^+$ | -0.01                   | 0.31                     | 0.99                        | 0.99 / 1.00                           |
|                                                    | <b><sup>2</sup>TS21</b> | <b><sup>4</sup>INT11</b> | <b>6<sup>th</sup> point</b> | <b>Final point</b>                    |
| $\text{PhSO}_2\text{N}(\text{Et})\cdot$            | 0.10                    | -0.01                    | -0.03                       | -0.02                                 |
| $\text{Co}^{\text{III}}(\text{salen})\text{-F}$    | -0.10                   | 0.01                     | 0.03                        | 0.02                                  |

**Table S5.** The spin densities on the counterpart of two different fluorinating reagents and on the  $\text{Co}(\text{salen})\text{-F}$ .

| <b>Intermediate</b>                     | <b><sup>2</sup>TS1</b> | <b>Final point of <sup>2,4</sup>INT1</b> | <b><sup>2</sup>TS21</b> | <b>Final point of <sup>4</sup>INT11</b> |
|-----------------------------------------|------------------------|------------------------------------------|-------------------------|-----------------------------------------|
| $\text{Me}_3\text{NPy}$                 | -0.16                  | 0.00 / 0.00                              | -                       | -                                       |
| $\text{PhSO}_2\text{N}(\text{Et})\cdot$ | -                      | -                                        | -0.32                   | 1.00                                    |
| $\text{Co}(\text{salen})\text{-F}$      | 1.16                   | 1.00 / 3.00                              | 1.32                    | 2.00                                    |

**Table S6.** Electronic populations and spin densities on d-orbital of Co atom in each Co(salen) species, and geometrical parameters as well.

| <b>Geometrical parameters</b> | Co <sup>II</sup> (salen) | [Co <sup>III</sup> (salen)] <sup>+</sup> | Co <sup>III</sup> (salen)-F | [Co <sup>IV</sup> (salen)-F] <sup>+</sup> |
|-------------------------------|--------------------------|------------------------------------------|-----------------------------|-------------------------------------------|
| d(Co–O1/Co–O2)                | 1.87/1.87                | 1.86/1.86                                | 1.87/1.87                   | 1.85/1.91                                 |
| d(Co–N1/Co–N2)                | 1.88/1.88                | 1.88/1.88                                | 1.92/1.93                   | 1.89/1.96                                 |
| d(Co–F)                       | –                        | –                                        | 1.87                        | 1.84                                      |
| ∠(N1–Co–O2)                   | 170.03                   | 173.46                                   | 173.36                      | 175.08                                    |
| ∠(N2–Co–O1)                   | 170.02                   | 173.46                                   | 149.36                      | 143.32                                    |
| D(O1–N1–N2–O2)                | 13.58                    | 8.92                                     | 16.35                       | 21.51                                     |

  

| <b>Electron populations / spin densities on d-orbital of Co</b> | Co <sup>II</sup> (salen) | [Co <sup>III</sup> (salen)] <sup>+</sup> | Co <sup>III</sup> (salen)-F | [Co <sup>IV</sup> (salen)-F] <sup>+</sup> |
|-----------------------------------------------------------------|--------------------------|------------------------------------------|-----------------------------|-------------------------------------------|
| <i>dxy</i>                                                      | 0.75/0.04                | 0.83/0.09                                | 0.96/0.17                   | 0.97/0.17                                 |
| <i>dz<sup>2</sup></i>                                           | 1.66/0.29                | 1.08/0.90                                | 1.23/0.71                   | 1.30/0.61                                 |
| <i>dxz</i>                                                      | 1.37/0.61                | 1.64/0.35                                | 1.36/0.62                   | 1.51/0.46                                 |
| <i>dyz</i>                                                      | 1.87/0.04                | 1.94/0.01                                | 1.83/0.12                   | 1.59/0.38                                 |
| <i>dx<sup>2</sup>-y<sup>2</sup></i>                             | 1.97/0.01                | 1.97/0.02                                | 1.91/0.07                   | 1.94/0.04                                 |

**Table S7.** Total charges and spin densities of selected atom and salen moiety in Co<sup>II</sup>(salen), [Co<sup>III</sup>(salen)]<sup>+</sup>, Co<sup>III</sup>(salen)-F, and [Co<sup>IV</sup>(salen)-F]<sup>+</sup>

| <b>Total charges / spin densities</b>     | Co                    | salen                  | F                      | O1                     | O2                     | N1                      | N2                     |
|-------------------------------------------|-----------------------|------------------------|------------------------|------------------------|------------------------|-------------------------|------------------------|
| Co <sup>II</sup> (salen)                  | <u>0.74 /</u><br>1.00 | <u>-0.74 /</u><br>0.00 | –                      | <u>-0.64 /</u><br>0.01 | <u>-0.64 /</u><br>0.01 | <u>-0.44 /</u><br>0.00  | <u>-0.44 /</u><br>0.00 |
| [Co <sup>III</sup> (salen)] <sup>+</sup>  | <u>0.96 /</u><br>1.40 | <u>0.04 /</u><br>0.60  | –                      | <u>-0.57 /</u><br>0.13 | <u>-0.57 /</u><br>0.13 | <u>-0.42 /</u><br>0.04  | <u>-0.42 /</u><br>0.04 |
| Co <sup>III</sup> (salen)-F               | <u>0.94 /</u><br>1.69 | <u>-0.30 /</u><br>0.13 | <u>-0.64 /</u><br>0.18 | <u>-0.60 /</u><br>0.09 | <u>-0.57 /</u><br>0.00 | <u>-0.38 /</u><br>-0.02 | <u>-0.43 /</u><br>0.03 |
| [Co <sup>IV</sup> (salen)-F] <sup>+</sup> | <u>0.94 /</u><br>1.66 | <u>0.65 /</u><br>1.14  | <u>-0.59 /</u><br>0.20 | <u>-0.56 /</u><br>0.15 | <u>-0.46 /</u><br>0.23 | <u>-0.36 /</u><br>-0.04 | <u>-0.39 /</u><br>0.10 |

**Table S8.** Electronic potential energies and correction to zero point energies, thermal energies, enthalpies, free energies (in Hartree) and imaginary frequencies ( $\text{cm}^{-1}$ ) of optimized structures calculated at the B3LYP-D3/Def2-TZVP (SMD-custom solvent-dielectric constant $\epsilon=9.2$ ) // B3LYP-D3/Def2-SVP (SMD-custom solvent-dielectric constant $\epsilon=9.2$ ).

| Structure                                          | $E_{0,\text{Def2-TZVP}}$ | $E_{0,\text{Def2-SVP}}$ | $c\text{ZPE}_{298}$ | $c\text{U}_{298}$ | $c\text{H}_{298}$ | $c\text{G}_{298}$ | G            | Imaginary Frequency |
|----------------------------------------------------|--------------------------|-------------------------|---------------------|-------------------|-------------------|-------------------|--------------|---------------------|
| $\text{Co}^{\text{II}}(\text{salen})$              | -2969.355771             | -2967.448958            | 0.775097            | 0.816557          | 0.817502          | 0.703364          | -2968.652407 |                     |
| $\text{R}_3\text{Si-H}$                            | -815.3897199             | -814.8970932            | 0.168236            | 0.181054          | 0.181999          | 0.128373          | -815.2613469 |                     |
| $\text{R}_3\text{Si}\cdot$                         | -814.7318677             | -814.2407919            | 0.159001            | 0.17174           | 0.172684          | 0.118596          | -814.6132717 |                     |
| $\text{Co}^{\text{III}}(\text{salen})\text{-H}$    | -2969.925553             | -2968.016821            | 0.784083            | 0.825458          | 0.826403          | 0.71384           | -2969.211713 |                     |
| $[\text{Me}_3\text{NFPy}]^{++}$                    | -466.0403106             | -465.5193171            | 0.1749              | 0.18526           | 0.186204          | 0.137308          | -465.9030026 |                     |
| $^2\text{TS1}$                                     | -3435.402013             | -3432.982817            | 0.950239            | 1.003332          | 1.004276          | 0.864855          | -3434.537158 | -1027.855           |
| $^2\text{INT1}$                                    | -3435.435383             | -3433.015859            | 0.950656            | 1.004609          | 1.005553          | 0.863597          | -3434.571786 |                     |
| $\text{Co}^{\text{III}}(\text{salen})\text{-F}$    | -3069.243091             | -3067.210232            | 0.777709            | 0.820603          | 0.821547          | 0.704169          | -3068.538922 |                     |
| $[\text{Me}_3\text{NPy}]^+$                        | -366.1474339             | -365.7493791            | 0.16861             | 0.178719          | 0.179663          | 0.131463          | -366.0159709 |                     |
| $[\text{Co}^{\text{IV}}(\text{salen})\text{-F}]^+$ | -3069.039208             | -3067.008004            | 0.778337            | 0.821361          | 0.822305          | 0.704395          | -3068.334813 |                     |
| $\text{Me}_3\text{NPy}$                            | -366.3971434             | -365.9957758            | 0.169846            | 0.179568          | 0.180512          | 0.133392          | -366.2637514 |                     |
| $^4\text{TS2}$                                     | -3884.416                | -3881.903041            | 0.944827            | 1.001741          | 1.002685          | 0.854235          | -3883.561765 | -1029.32            |
| $[\text{Co}^{\text{III}}(\text{salen})]^+$         | -2969.174484             | -2967.269191            | 0.776377            | 0.817808          | 0.818752          | 0.704201          | -2968.470283 |                     |
| HF                                                 | -100.4955729             | -100.3578482            | 0.009194            | 0.011555          | 0.012499          | -0.007224         | -100.5027969 |                     |
| $\text{R}_3\text{Si}^+$                            | -814.5849497             | -814.0951108            | 0.16035             | 0.173011          | 0.173955          | 0.121171          | -814.4637787 |                     |
| <b>1</b>                                           | -578.2462855             | -577.6031919            | 0.225743            | 0.239159          | 0.240104          | 0.184329          | -578.0619565 |                     |
| <b>2</b>                                           | -578.0365885             | -577.3968095            | 0.226578            | 0.239947          | 0.240891          | 0.185411          | -577.8511775 |                     |
| $^3\text{TS3}$                                     | -3548.14989              | -3545.607713            | 1.00511             | 1.062081          | 1.063025          | 0.913161          | -3547.236729 | -671.1828           |
| <b>3</b>                                           | -578.815709              | -578.1730367            | 0.233809            | 0.248274          | 0.249218          | 0.190164          | -578.625545  |                     |

|                                                   |              |              |          |          |          |           |              |                |
|---------------------------------------------------|--------------|--------------|----------|----------|----------|-----------|--------------|----------------|
| <b><sup>2</sup>TS4</b>                            | -1393.409248 | -1392.282047 | 0.394674 | 0.421354 | 0.422298 | 0.336346  | -1393.072902 | -653.9432      |
| <b><sup>4</sup>TS5</b>                            | -3648.065193 | -3645.40229  | 1.011468 | 1.070245 | 1.07119  | 0.918347  | -3647.146846 | -181.9567      |
| <b>4</b>                                          | -678.7708369 | -678.0040887 | 0.241682 | 0.256265 | 0.25721  | 0.19883   | -678.5720069 |                |
| <b><sup>1</sup>INT2</b>                           | -466.9196425 | -466.386344  | 0.182632 | 0.194419 | 0.195363 | 0.142662  | -466.7769805 |                |
| <b><sup>2</sup>TS6</b>                            | -1281.651613 | -1280.640047 | 0.343345 | 0.368157 | 0.369102 | 0.285867  | -1281.365746 | -110.8474      |
| <b>R<sub>3</sub>Si-F</b>                          | -914.7601416 | -914.1365615 | 0.163016 | 0.176706 | 0.177651 | 0.121402  | -914.6387396 |                |
| <b>Me<sub>3</sub>NHPy</b>                         | -366.954612  | -366.5546701 | 0.179052 | 0.189431 | 0.190375 | 0.14235   | -366.812262  |                |
| <b><sup>2</sup>TS7</b>                            | -945.1746391 | -944.1353108 | 0.401107 | 0.425699 | 0.426643 | 0.340752  | -944.8338871 | -<br>2186.2055 |
| <b><sup>1</sup>TS8</b>                            | -3336.329134 | -3334.027538 | 0.954152 | 1.005844 | 1.006788 | 0.871725  | -3335.457409 | -876.9353      |
| <b>5</b>                                          | -578.6539964 | -578.0137202 | 0.238554 | 0.251902 | 0.252846 | 0.199212  | -578.4547844 |                |
| <b>BF<sub>4</sub><sup>-</sup></b>                 | -424.8200414 | -424.2828807 | 0.014417 | 0.01876  | 0.019704 | -0.013172 | -424.8332134 |                |
| <b><sup>1</sup>INT3</b>                           | -1003.493094 | -1002.328227 | 0.254192 | 0.273796 | 0.27474  | 0.204748  | -1003.288346 |                |
| <b><sup>1</sup>TS12</b>                           | -1003.48464  | -1002.319426 | 0.253125 | 0.272186 | 0.27313  | 0.203705  | -1003.280935 | -168.1318      |
| <b><sup>1</sup>INT4</b>                           | -1003.496243 | -1002.33689  | 0.255244 | 0.274913 | 0.275857 | 0.203272  | -1003.292971 |                |
| <b>BF<sub>3</sub></b>                             | -324.7168659 | -324.316148  | 0.012329 | 0.015842 | 0.016787 | -0.01383  | -324.7306959 |                |
| <b><sup>3</sup>TS10</b>                           | -3548.188335 | -3545.649141 | 1.013328 | 1.068913 | 1.069857 | 0.926881  | -3547.261454 | -102.4296      |
| <b>Co<sup>III</sup>(salen)-alkyl</b>              | -3548.210627 | -3545.673227 | 1.017241 | 1.072178 | 1.073122 | 0.933807  | -3547.27682  |                |
| <b>[Co<sup>IV</sup>(salen)-alkyl]<sup>+</sup></b> | -3548.033926 | -3545.496585 | 1.017647 | 1.072893 | 1.073837 | 0.933289  | -3547.100637 |                |
| <b><sup>2</sup>TS11</b>                           | -3972.861931 | -3969.805261 | 1.030534 | 1.091944 | 1.092888 | 0.936922  | -3971.925009 | -128.7074      |
| <b><sup>1</sup>TS13</b>                           | -1003.475912 | -1002.31114  | 0.253401 | 0.27241  | 0.273354 | 0.204151  | -1003.271761 | -297.1565      |
| <b>6</b>                                          | -657.4746866 | -656.747797  | 0.290394 | 0.307199 | 0.308143 | 0.24561   | -657.2290766 |                |
| <b>7</b>                                          | -657.4746866 | -656.747797  | 0.290394 | 0.307199 | 0.308143 | 0.24561   | -657.2290766 |                |
| <b>8</b>                                          | -657.3208869 | -656.5964782 | 0.293532 | 0.310175 | 0.311119 | 0.250285  | -657.0706019 |                |
| <b><sup>1</sup>TS14</b>                           | -1082.147708 | -1080.900272 | 0.309116 | 0.330874 | 0.331818 | 0.257403  | -1081.890305 | -172.5981      |

|                                     |              |              |          |          |          |           |              |           |
|-------------------------------------|--------------|--------------|----------|----------|----------|-----------|--------------|-----------|
| <b>9</b>                            | -757.4302491 | -756.5794404 | 0.297907 | 0.314984 | 0.315928 | 0.253591  | -757.1766581 |           |
| <b><sup>1</sup>TS15</b>             | -1082.159901 | -1080.912003 | 0.308595 | 0.330358 | 0.331302 | 0.256887  | -1081.903014 | -101.3973 |
| <b>10</b>                           | -757.4367735 | -756.5855644 | 0.297393 | 0.314584 | 0.315529 | 0.252737  | -757.1840365 |           |
| <b>OTf<sup>-</sup></b>              | -961.9405676 | -961.0324882 | 0.027136 | 0.034336 | 0.03528  | -0.005538 | -961.9461056 |           |
| <b><sup>1</sup>TS27</b>             | -1540.571471 | -1539.038142 | 0.266237 | 0.288231 | 0.289175 | 0.212942  | -1540.358529 | -232.5095 |
| <b>CF<sub>2</sub>SO<sub>3</sub></b> | -861.7866824 | -861.0106925 | 0.022654 | 0.029874 | 0.030818 | -0.01092  | -861.7976024 |           |
| <b>PF<sub>6</sub><sup>-</sup></b>   | -941.1008284 | -940.1828738 | 0.01932  | 0.025444 | 0.026388 | -0.007914 | -941.1087424 |           |
| <b><sup>1</sup>TS28</b>             | -1519.760249 | -1518.215947 | 0.25816  | 0.279014 | 0.279959 | 0.206577  | -1519.553672 | -173.4015 |
| <b>PF<sub>5</sub></b>               | -840.9920903 | -840.1998001 | 0.01633  | 0.021926 | 0.02287  | -0.013587 | -841.0056773 |           |

Calculated by M06 functional at the same level of basis sets.

|                                               |              |              |          |          |          |           |              |           |
|-----------------------------------------------|--------------|--------------|----------|----------|----------|-----------|--------------|-----------|
| <b>Co<sup>II</sup>(salen)</b>                 | -2967.975825 | -2966.069115 | 0.769331 | 0.810999 | 0.811943 | 0.697512  | -2967.278313 |           |
| <b>R<sub>3</sub>Si-H</b>                      | -815.1294902 | -814.641064  | 0.167544 | 0.180298 | 0.181243 | 0.128757  | -815.0007332 |           |
| <b>R<sub>3</sub>Si<sup>·</sup></b>            | -814.4708732 | -813.9848705 | 0.158287 | 0.170926 | 0.17187  | 0.119083  | -814.3517902 |           |
| <b>Co<sup>III</sup>(salen)-H</b>              | -2968.539269 | -2966.630579 | 0.777718 | 0.819407 | 0.820352 | 0.70701   | -2967.832259 |           |
| <b>[Me<sub>3</sub>NPy]<sup>+</sup></b>        | -465.6997583 | -465.1815921 | 0.174389 | 0.184493 | 0.185437 | 0.139363  | -465.5603953 |           |
| <b><sup>2</sup>TS1</b>                        | -3433.679871 | -3431.262867 | 0.942827 | 0.995944 | 0.996888 | 0.858879  | -3432.820992 | -1157.744 |
| <b><sup>2</sup>INT1</b>                       | -3433.710663 | -3431.293358 | 0.94262  | 0.996651 | 0.997595 | 0.856708  | -3432.853955 |           |
| <b>Co<sup>III</sup>(salen)-F</b>              | -3067.827214 | -3065.801668 | 0.771887 | 0.815007 | 0.815951 | 0.697457  | -3067.129757 |           |
| <b>[Me<sub>3</sub>NPy]<sup>+</sup></b>        | -365.8394536 | -365.4405407 | 0.167737 | 0.177744 | 0.178688 | 0.131641  | -365.7078126 |           |
| <b>[Co<sup>IV</sup>(salen)-F]<sup>+</sup></b> | -3067.621989 | -3065.595926 | 0.772089 | 0.815284 | 0.816228 | 0.698594  | -3066.923395 |           |
| <b>Me<sub>3</sub>NPy</b>                      | -366.0909465 | -365.6924382 | 0.168952 | 0.178688 | 0.179632 | 0.13321   | -365.9577365 |           |
| <b>[Co<sup>III</sup>(salen)]<sup>+</sup></b>  | -2967.788357 | -2965.882652 | 0.769587 | 0.810544 | 0.811488 | 0.698112  | -2967.090245 |           |
| <b>HF</b>                                     | -100.4599744 | -100.3304276 | 0.009499 | 0.01186  | 0.012804 | -0.006905 | -100.4668794 |           |
| <b><sup>1</sup>INT2</b>                       | -466.5736609 | -466.0509059 | 0.182266 | 0.194023 | 0.194968 | 0.143431  | -466.4302299 |           |

|                           |              |              |          |          |          |          |              |           |
|---------------------------|--------------|--------------|----------|----------|----------|----------|--------------|-----------|
| <b><sup>2</sup>TS6</b>    | -1281.049723 | -1280.048821 | 0.338859 | 0.363724 | 0.364668 | 0.283323 | -1280.7664   | -652.5723 |
| <b>R<sub>3</sub>Si-F</b>  | -914.4676185 | -913.8551759 | 0.162441 | 0.176004 | 0.176949 | 0.122564 | -914.3450545 |           |
| <b>Me<sub>3</sub>NHPy</b> | -366.6455248 | -366.2481817 | 0.177838 | 0.188462 | 0.189406 | 0.140583 | -366.5049418 |           |
| <b><sup>1</sup>TS8</b>    | -3334.645372 | -3332.341905 | 0.946525 | 0.998227 | 0.999172 | 0.865503 | -3333.779869 | -460.5247 |
| <b>1</b>                  | -577.8072609 | -577.1708119 | 0.224554 | 0.238038 | 0.238982 | 0.183357 | -577.6239039 |           |
| <b><sup>3</sup>TS9</b>    | -3546.33425  | -3543.794575 | 0.996996 | 1.054021 | 1.054965 | 0.907765 | -3545.426485 | -573.9224 |
| <b>3</b>                  | -578.3757076 | -577.739827  | 0.232879 | 0.247309 | 0.248253 | 0.189911 | -578.1857966 |           |

**Table S9.** Electronic potential energies and correction to zero point energies, thermal energies, enthalpies, free energies (in Hartree) and imaginary frequencies (cm<sup>-1</sup>) of optimized structures calculated at the B3LYP-D3/Def2-TZVP (SMD-1,4-Dioxane) // B3LYP-D3/Def2-SVP (SMD-1,4-Dioxane).

| Structure                                 | E <sub>0,Def2-TZVP</sub> | E <sub>0,Def2-SVP</sub> | cZPE <sub>298</sub> | cU <sub>298</sub> | cH <sub>298</sub> | cG <sub>298</sub> | G            | Imaginary Frequency |
|-------------------------------------------|--------------------------|-------------------------|---------------------|-------------------|-------------------|-------------------|--------------|---------------------|
| Co <sup>II</sup> (salen)                  | -2732.159806             | -2730.5125              | 0.590773            | 0.621168          | 0.622113          | 0.531878          | -2731.6279   |                     |
| 11                                        | -696.9866456             | -696.20919              | 0.258095            | 0.273225          | 0.274169          | 0.216334          | -696.77031   |                     |
| <sup>2</sup> INT5                         | -3429.171972             | -3426.7572              | 0.850577            | 0.898041          | 0.898985          | 0.77105           | -3428.4009   |                     |
| <sup>2</sup> TS16                         | -3429.152362             | -3426.7386              | 0.849395            | 0.896021          | 0.896965          | 0.773427          | -3428.3789   | -818.7907           |
| <sup>4</sup> INT6                         | -3429.178047             | -3426.7614              | 0.848756            | 0.896396          | 0.897341          | 0.769272          | -3428.4088   |                     |
| Co <sup>III</sup> (salen)-F               | -2832.044091             | -2830.2692              | 0.592726            | 0.624785          | 0.625729          | 0.53128           | -2831.5128   |                     |
| 12                                        | -597.109084              | -596.4533               | 0.253767            | 0.267819          | 0.268764          | 0.212452          | -596.89663   |                     |
| [Co <sup>IV</sup> (salen)-F] <sup>+</sup> | -2831.8249               | -2830.0521              | 0.592577            | 0.624817          | 0.625761          | 0.530742          | -2831.2942   |                     |
| 15                                        | -597.2407079             | -596.5778               | 0.253691            | 0.267227          | 0.268171          | 0.213764          | -597.02694   |                     |
| <sup>2</sup> TS17                         | -597.0918202             | -596.43745              | 0.248651            | 0.262038          | 0.262982          | 0.208647          | -596.88317   | -1581.2896          |
| 13                                        | -597.1347618             | -596.47899              | 0.254306            | 0.268186          | 0.26913           | 0.21377           | -596.92099   |                     |
| <sup>2</sup> TS18                         | -1294.115629             | -1292.686775            | 0.51284             | 0.543277          | 0.544221          | 0.451721          | -1293.663908 | -653.8867           |
| 14                                        | -697.0676339             | -696.28874              | 0.261194            | 0.275867          | 0.276811          | 0.219855          | -696.84778   |                     |
| <sup>4</sup> INT7                         | -3429.198115             | -3426.7835              | 0.847641            | 0.895718          | 0.896662          | 0.766544          | -3428.4316   |                     |
| <sup>4</sup> TS19                         | -3429.195302             | -3426.7822              | 0.847014            | 0.894627          | 0.895571          | 0.766683          | -3428.4286   | -227.7637           |
| <sup>2</sup> INT8                         | -3429.250187             | -3426.8364              | 0.853869            | 0.900618          | 0.901563          | 0.776548          | -3428.4736   |                     |
| <sup>3</sup> INT9                         | -3529.057304             | -3526.5141              | 0.853172            | 0.902046          | 0.90299           | 0.771794          | -3528.2855   |                     |
| <sup>3</sup> TS20                         | -3529.01956              | -3526.4795              | 0.851691            | 0.89956           | 0.900504          | 0.774736          | -3528.2448   | -1017.3779          |
| <sup>3</sup> INT10                        | -3529.055441             | -3526.5136              | 0.851676            | 0.900139          | 0.901083          | 0.773053          | -3528.2824   |                     |
| Co <sup>IV</sup> (salen)-F <sub>2</sub>   | -2931.918199             | -2930.017               | 0.595911            | 0.628705          | 0.62965           | 0.535183          | -2931.383    |                     |

Calculated by M06 functional at the same level of basis sets.

|                          |              |              |          |          |          |          |              |  |
|--------------------------|--------------|--------------|----------|----------|----------|----------|--------------|--|
| Co <sup>II</sup> (salen) | -2730.995714 | -2729.350531 | 0.586602 | 0.617133 | 0.618077 | 0.527802 | -2730.467912 |  |
| 11                       | -696.4805526 | -695.7120544 | 0.256381 | 0.271721 | 0.272665 | 0.214318 | -696.2662346 |  |

|                                               |              |              |          |          |          |          |              |           |
|-----------------------------------------------|--------------|--------------|----------|----------|----------|----------|--------------|-----------|
| <b><sup>2</sup>INT5</b>                       | -3427.513044 | -3425.104474 | 0.84509  | 0.892008 | 0.892952 | 0.769344 | -3426.7437   |           |
| <b><sup>2</sup>TS16</b>                       | -3427.486995 | -3425.080039 | 0.842894 | 0.889424 | 0.890368 | 0.768249 | -3426.718746 | -800.9167 |
| <b><sup>4</sup>INT6</b>                       | -3427.517322 | -3425.109219 | 0.842549 | 0.889881 | 0.890826 | 0.765261 | -3426.752061 |           |
| <b>Co<sup>III</sup>(salen)-F</b>              | -2830.844561 | -2829.079085 | 0.588712 | 0.620744 | 0.621688 | 0.52809  | -2830.316471 |           |
| <b>12</b>                                     | -596.6386999 | -595.9867659 | 0.252143 | 0.266235 | 0.267179 | 0.211168 | -596.4275319 |           |
| <b>[Co<sup>IV</sup>(salen)-F]<sup>+</sup></b> | -2830.623664 | -2828.857333 | 0.588776 | 0.620863 | 0.621807 | 0.528038 | -2830.095626 |           |
| <b>15</b>                                     | -596.7707289 | -596.1151759 | 0.251995 | 0.265709 | 0.266653 | 0.212215 | -596.5585139 |           |
| <b><sup>2</sup>TS17</b>                       | -596.6165831 | -595.9670901 | 0.246766 | 0.260304 | 0.261249 | 0.206739 | -596.4098441 | -2075.836 |
| <b>13</b>                                     | -596.6618909 | -596.0115326 | 0.25207  | 0.266203 | 0.267147 | 0.211175 | -596.4507159 |           |
| <b><sup>2</sup>TS18</b>                       | -1293.138633 | -1291.721106 | 0.509319 | 0.539592 | 0.540536 | 0.449663 | -1292.68897  | -747.7865 |
| <b>14</b>                                     | -696.5629479 | -695.7948502 | 0.259754 | 0.274506 | 0.27545  | 0.21844  | -696.3445079 |           |

**Table S10.** Electronic potential energies and correction to zero point energies, thermal energies, enthalpies, free energies (in Hartree) and imaginary frequencies (cm<sup>-1</sup>) of optimized structures calculated at the B3LYP-D3/Def2-TZVP (SMD-EthylEthanoate) // B3LYP-D3/Def2-SVP (SMD-EthylEthanoate).

| Structure                                 | E <sub>0,Def2-TZVP</sub> | E <sub>0,Def2-SVP</sub> | cZPE <sub>298</sub> | cU <sub>298</sub> | cH <sub>298</sub> | cG <sub>298</sub> | G            | Imaginary Frequency |
|-------------------------------------------|--------------------------|-------------------------|---------------------|-------------------|-------------------|-------------------|--------------|---------------------|
| Co <sup>II</sup> (salen)                  | -2968.166499             | -2966.2636              | 0.757507            | 0.796733          | 0.797677          | 0.688119          | -2967.47838  |                     |
| PhSO <sub>2</sub> N(Et)F                  | -1014.319944             | -1013.4194              | 0.174622            | 0.187109          | 0.188053          | 0.13501           | -1014.184934 |                     |
| <sup>2</sup> TS21                         | -3982.486953             | -3979.6974              | 0.93184             | 0.985047          | 0.985991          | 0.845297          | -3981.641656 | -1230.6473          |
| <sup>4</sup> INT11                        | -3982.516738             | -3979.7237              | 0.931434            | 0.985575          | 0.986519          | 0.842483          | -3981.674255 |                     |
| Co <sup>III</sup> (salen)-F               | -3068.056275             | -3066.0246              | 0.759555            | 0.800428          | 0.801372          | 0.687742          | -3067.368533 |                     |
| PhSO <sub>2</sub> N·(Et)                  | -914.449467              | -913.67166              | 0.169173            | 0.181152          | 0.182096          | 0.128163          | -914.321304  |                     |
| [Co <sup>IV</sup> (salen)-F] <sup>+</sup> | -3067.858145             | -3065.8278              | 0.760453            | 0.801418          | 0.802363          | 0.688483          | -3067.169662 |                     |
| PhSO <sub>2</sub> N·(Et)                  | -914.6067209             | -913.8172               | 0.169836            | 0.181405          | 0.182349          | 0.13023           | -914.4764909 |                     |
| 16                                        | -309.7824519             | -309.44595              | 0.133345            | 0.140027          | 0.140971          | 0.102262          | -309.6801899 |                     |
| <sup>2</sup> TS22                         | -1224.23397              | -1223.1268              | 0.305388            | 0.32424           | 0.325184          | 0.25534           | -1223.97863  | -218.3675           |
| 17                                        | -1224.271627             | -1223.1697              | 0.308611            | 0.327142          | 0.328086          | 0.259188          | -1224.012439 |                     |
| <sup>4</sup> INT12                        | -4292.362046             | -4289.2442              | 1.070189            | 1.131249          | 1.132193          | 0.974114          | -4291.387932 |                     |
| <sup>4</sup> TS23                         | -4292.335815             | -4289.2196              | 1.067009            | 1.128343          | 1.129287          | 0.969593          | -4291.366222 | -284.7155           |
| <sup>2</sup> INT13                        | -4292.394608             | -4289.2805              | 1.073752            | 1.134184          | 1.135128          | 0.977878          | -4291.41673  |                     |
| 18                                        | -1324.206971             | -1322.9809              | 0.314632            | 0.333984          | 0.334928          | 0.26433           | -1323.942641 |                     |
| <sup>3</sup> INT14                        | -4082.399036             | -4079.4796              | 0.935968            | 0.99123           | 0.992174          | 0.846133          | -4081.552903 |                     |
| <sup>3</sup> TS24                         | -4082.36688              | -4079.4491              | 0.933932            | 0.988398          | 0.989342          | 0.847312          | -4081.519568 | -1067.0276          |
| <sup>3</sup> INT15                        | -4082.404537             | -4079.4843              | 0.933968            | 0.9889            | 0.989845          | 0.847482          | -4081.557055 |                     |
| Co <sup>IV</sup> (salen)-F <sub>2</sub>   | -3167.937074             | -3165.7785              | 0.762205            | 0.804066          | 0.80501           | 0.690608          | -3167.246466 |                     |
| [Co <sup>II</sup> (salen)-F] <sup>-</sup> | -3068.191823             | -3066.1559              | 0.755391            | 0.797244          | 0.798188          | 0.681608          | -3067.510215 |                     |

|                                          |              |            |          |          |          |          |              |           |
|------------------------------------------|--------------|------------|----------|----------|----------|----------|--------------|-----------|
| <b>PhSO<sub>2</sub>N<sup>+</sup>(Et)</b> | -914.3143504 | -913.54261 | 0.172232 | 0.183882 | 0.184826 | 0.133718 | -914.1806324 |           |
| <b><sup>1</sup>TS25</b>                  | -1224.055307 | -1222.953  | 0.306253 | 0.324992 | 0.325936 | 0.258434 | -1223.796873 | -268.187  |
| <b>19</b>                                | -1224.091251 | -1222.99   | 0.310598 | 0.328911 | 0.329855 | 0.261841 | -1223.82941  |           |
| <b><sup>2</sup>INT16</b>                 | -2238.605016 | -2236.6106 | 0.484655 | 0.517779 | 0.518723 | 0.41466  | -2238.190356 |           |
| <b><sup>2</sup>TS26</b>                  | -2238.587333 | -2236.5911 | 0.482974 | 0.515821 | 0.516765 | 0.412977 | -2238.174356 | -715.9695 |
| <b><sup>2</sup>INT17</b>                 | -2238.661552 | -2236.6677 | 0.485963 | 0.518904 | 0.519848 | 0.415851 | -2238.245701 |           |

**Cartesian Coordinates of optimized Structures**

**Structure S1. Co<sup>II</sup>(salen)**

-----  
27 0.000043 0.899119 0.000415  
8 -1.295777 -0.451937 0.099498  
8 1.295745 -0.452032 -0.098749  
7 -1.269198 2.274077 -0.225661  
7 1.269362 2.274048 0.226074  
6 -2.589105 -0.377307 0.046823  
6 -3.384380 -1.574716 0.203296  
6 -4.765495 -1.456399 0.116838  
1 -5.374318 -2.353989 0.225741  
6 -5.452511 -0.233836 -0.105887  
6 -4.688688 0.908875 -0.235050  
1 -5.176430 1.875685 -0.398612  
6 -3.271026 0.868713 -0.160041  
6 -2.558137 2.107961 -0.285474  
1 -3.191063 2.988263 -0.449565  
6 2.558335 2.107960 0.285128  
1 3.191364 2.988286 0.448686  
6 3.271141 0.868663 0.159584  
6 4.688836 0.908814 0.233920  
1 5.176675 1.875659 0.396979  
6 5.452579 -0.233955 0.104752  
6 4.765438 -1.456566 -0.117285  
1 5.374187 -2.354208 -0.226174  
6 3.384277 -1.574865 -0.203098  
6 2.589106 -0.377396 -0.046645  
6 -2.696070 -2.929109 0.464425  
6 -1.896627 -2.853908 1.787223  
1 -2.573027 -2.660211 2.636122  
1 -1.144555 -2.056819 1.747565  
1 -1.379797 -3.809640 1.974944  
6 -1.746468 -3.273177 -0.706987  
1 -0.964162 -2.514278 -0.815846  
1 -2.309507 -3.343708 -1.652470  
1 -1.260189 -4.246581 -0.528431  
6 -3.711917 -4.078908 0.597022  
1 -4.303047 -4.216707 -0.322445  
1 -4.410200 -3.922005 1.434580  
1 -3.173738 -5.020786 0.787979  
6 2.695785 -2.929282 -0.463607  
6 3.711482 -4.079226 -0.596155

1 4.302957 -4.216716 0.323137  
1 4.409454 -3.922721 -1.434045  
1 3.173145 -5.021130 -0.786539  
6 1.746465 -3.272943 0.708159  
1 0.964252 -2.513949 0.817054  
1 2.309771 -3.343273 1.653498  
1 1.260064 -4.246358 0.529995  
6 1.896013 -2.854339 -1.786218  
1 2.572249 -2.661100 -2.635352  
1 1.144159 -2.057038 -1.746642  
1 1.378882 -3.809996 -1.973485  
6 0.642865 3.606630 0.457258  
6 -0.642680 3.606686 -0.456718  
6 1.582802 4.774522 0.126520  
1 1.029743 5.723091 0.141519  
1 2.380561 4.864987 0.877671  
1 2.051339 4.663650 -0.861059  
6 0.258970 3.669290 1.949505  
1 1.153843 3.490799 2.563870  
1 -0.145599 4.656309 2.214655  
1 -0.487608 2.900756 2.197320  
6 -1.582636 4.774528 -0.125815  
1 -2.051449 4.663271 0.861589  
1 -1.029516 5.723070 -0.140295  
1 -2.380188 4.865352 -0.877134  
6 -0.258754 3.669530 -1.948934  
1 -1.153655 3.491351 -2.563352  
1 0.146045 4.656502 -2.213914  
1 0.487649 2.900855 -2.196842  
6 6.971465 -0.199945 0.192589  
6 7.633351 -0.656000 -1.118897  
6 7.493659 -1.017587 1.386435  
1 7.260486 0.852440 0.360563  
1 7.290200 -0.047628 -1.970642  
1 8.730862 -0.571792 -1.055771  
1 7.393747 -1.709343 -1.340789  
1 7.051088 -0.667835 2.332561  
1 7.245960 -2.086461 1.275224  
1 8.590225 -0.937693 1.468964  
6 -6.971357 -0.199825 -0.194399  
6 -7.633810 -0.655381 1.116976  
6 -7.493061 -1.017900 -1.388161  
1 -7.260282 0.852503 -0.362886  
1 -7.291030 -0.046681 1.968636

1 -8.731295 -0.571205 1.053343  
1 -7.394291 -1.708637 1.339372  
1 -7.050042 -0.668546 -2.334225  
1 -7.245484 -2.086747 -1.276425  
1 -8.589585 -0.937970 -1.471215

-----  
**Structure S2. R<sub>3</sub>Si-H**  
-----

8 -0.001767 -0.467554 0.067426  
14 -1.588815 -0.043556 0.372826  
1 -1.784068 0.015626 1.857044  
14 1.593123 -0.080037 0.379936  
1 1.808930 -0.133872 1.861401  
6 -1.955516 1.642158 -0.371186  
1 -3.006063 1.927795 -0.194497  
1 -1.311422 2.420795 0.068901  
1 -1.782129 1.630294 -1.460158  
6 -2.689370 -1.372214 -0.360229  
1 -2.453700 -2.360587 0.066568  
1 -3.751320 -1.154484 -0.157888  
1 -2.553229 -1.428505 -1.453013  
6 1.967141 1.653732 -0.240139  
1 1.772838 1.728042 -1.323080  
1 1.342069 2.403665 0.271556  
1 3.024423 1.912987 -0.062900  
6 2.670862 -1.359693 -0.465499  
1 3.737166 -1.169037 -0.258748  
1 2.428727 -2.375469 -0.113162  
1 2.522893 -1.330414 -1.557787

-----  
**Structure S3. R<sub>3</sub>Si·**  
-----

8 0.025930 -0.490578 -0.146968  
14 1.614192 -0.043154 -0.445112  
14 -1.578897 -0.081125 -0.390099  
1 -1.856401 -0.129440 -1.860388  
6 1.948057 1.648842 0.336417  
1 3.006244 1.931106 0.212236  
1 1.324359 2.437182 -0.113525  
1 1.723001 1.607055 1.417761  
6 2.715421 -1.365602 0.333719  
1 2.512763 -2.360763 -0.092422  
1 3.780069 -1.128775 0.176117  
1 2.525740 -1.410188 1.421615

6 -1.904604 1.655104 0.249164  
1 -1.656931 1.726447 1.321310  
1 -1.297937 2.399150 -0.292174  
1 -2.966733 1.924600 0.123790  
6 -2.631977 -1.352348 0.497766  
1 -3.704027 -1.152867 0.333110  
1 -2.412089 -2.369675 0.135509  
1 -2.441009 -1.325270 1.583366

-----  
**Structure S4. Co<sup>III</sup>(salen)-H**  
-----

27 0.015233 0.896376 -0.002968  
8 1.290640 -0.469940 0.194122  
8 -1.282491 -0.452505 0.127516  
7 1.286938 2.271078 0.242637  
7 -1.253065 2.281318 -0.177873  
6 2.579301 -0.392754 0.077869  
6 3.360269 -1.596045 -0.105264  
6 4.743929 -1.477794 -0.138012  
1 5.341200 -2.380137 -0.269431  
6 5.447248 -0.250147 -0.022251  
6 4.695017 0.900200 0.110048  
1 5.192904 1.872629 0.185732  
6 3.276739 0.859773 0.147002  
6 2.573329 2.101691 0.291367  
1 3.209275 2.977887 0.466366  
6 -2.534085 2.106866 -0.300657  
1 -3.163647 2.987131 -0.477988  
6 -3.247249 0.865027 -0.216408  
6 -4.659821 0.906260 -0.352380  
1 -5.137859 1.871093 -0.551889  
6 -5.430856 -0.232623 -0.233595  
6 -4.755257 -1.448402 0.049581  
1 -5.369903 -2.341755 0.159634  
6 -3.378928 -1.567757 0.194873  
6 -2.573135 -0.377380 0.031600  
6 2.653376 -2.949237 -0.313964  
6 1.784894 -2.858212 -1.591859  
1 2.420746 -2.687579 -2.476100  
1 1.060447 -2.038046 -1.517090  
1 1.229716 -3.797890 -1.746200  
6 1.769715 -3.296750 0.906356  
1 0.988351 -2.544066 1.054628  
1 2.382479 -3.359919 1.821056

1 1.284004 -4.275152 0.755488  
6 3.654355 -4.103342 -0.508108  
1 4.298642 -4.244289 0.374584  
1 4.302078 -3.949790 -1.385790  
1 3.101145 -5.042403 -0.667358  
6 -2.712509 -2.916319 0.531131  
6 -3.741812 -4.052434 0.676995  
1 -4.303332 -4.224556 -0.255100  
1 -4.465912 -3.856729 1.483933  
1 -3.217359 -4.989038 0.923793  
6 -1.729142 -3.311383 -0.593412  
1 -0.942489 -2.558918 -0.706122  
1 -2.260902 -3.418239 -1.553426  
1 -1.251118 -4.277306 -0.360259  
6 -1.954208 -2.794602 1.874430  
1 -2.653814 -2.558079 2.693137  
1 -1.191451 -2.008396 1.824750  
1 -1.455101 -3.747230 2.117567  
6 -0.638208 3.627681 -0.356778  
6 0.661663 3.592185 0.532037  
6 -1.585008 4.762997 0.063278  
1 -1.037915 5.713652 0.117393  
1 -2.385440 4.904317 -0.676953  
1 -2.049650 4.574823 1.040827  
6 -0.285180 3.791077 -1.848390  
1 -1.184767 3.616760 -2.457089  
1 0.076256 4.807765 -2.057755  
1 0.482646 3.067584 -2.153987  
6 1.595319 4.773224 0.232331  
1 2.050039 4.699509 -0.764998  
1 1.039892 5.718854 0.289329  
1 2.402643 4.838438 0.975761  
6 0.303049 3.594178 2.032818  
1 1.207599 3.390153 2.624469  
1 -0.097274 4.568790 2.345594  
1 -0.440370 2.816006 2.260562  
6 -6.944483 -0.199688 -0.385694  
6 -7.660903 -0.616745 0.910115  
6 -7.418247 -1.051439 -1.575795  
1 -7.223896 0.847648 -0.595992  
1 -7.351628 0.015587 1.757377  
1 -8.754645 -0.533021 0.799311  
1 -7.433224 -1.663528 1.171888  
1 -6.936168 -0.729923 -2.512558

1 -7.177632 -2.116807 -1.423156  
1 -8.510266 -0.973013 -1.705900  
6 6.968047 -0.216839 -0.061362  
6 7.518197 -0.712444 -1.409831  
6 7.588506 -1.000211 1.107997  
1 7.269532 0.839482 0.050591  
1 7.104804 -0.128439 -2.247292  
1 8.617127 -0.628794 -1.441105  
1 7.261075 -1.771276 -1.579846  
1 7.226534 -0.622301 2.077257  
1 7.333314 -2.071464 1.049100  
1 8.688045 -0.919839 1.096075  
1 0.168142 0.888796 -1.415555

---

**Structure S5. [Me<sub>3</sub>NFPy]<sup>+</sup>**

---

6 -0.374367 1.218618 -0.001711  
6 1.014626 1.206500 -0.010826  
6 1.736327 0.000463 -0.013545  
6 1.015126 -1.205904 -0.010842  
6 -0.373826 -1.218659 -0.001696  
1 1.532896 2.166083 -0.017389  
1 1.533873 -2.165230 -0.017435  
6 3.234284 0.000419 0.009577  
1 3.580444 -0.006509 1.057785  
1 3.644460 -0.893709 -0.479991  
1 3.644819 0.900350 -0.468778  
6 -1.242221 -2.431750 0.000179  
1 -1.896053 -2.437382 -0.885692  
1 -0.620720 -3.334165 -0.001850  
1 -1.891560 -2.437978 0.889256  
6 -1.243333 2.431299 0.000153  
1 -1.897997 2.436036 -0.885082  
1 -1.891769 2.437816 0.889899  
1 -0.622253 3.334005 -0.002975  
7 -0.970328 -0.000150 0.003072  
9 -2.324838 -0.000464 0.008113

---

**Structure S6. <sup>2</sup>TS1**

---

27 0.248001 1.215076 -0.476340  
8 -0.982616 0.107793 -1.340042  
8 1.540441 -0.074109 -0.863905  
7 -0.982249 2.636733 -0.294727

|   |           |           |           |   |           |           |           |
|---|-----------|-----------|-----------|---|-----------|-----------|-----------|
| 7 | 1.465694  | 2.337180  | 0.430078  | 1 | 3.104486  | -1.047331 | -3.950611 |
| 6 | -2.278398 | 0.170477  | -1.285910 | 1 | 1.576110  | -0.851924 | -3.045103 |
| 6 | -3.067755 | -1.014825 | -1.520769 | 1 | 1.882109  | -2.345807 | -3.967029 |
| 6 | -4.451486 | -0.885113 | -1.514788 | 6 | 0.822245  | 3.530680  | 1.057440  |
| 1 | -5.058597 | -1.773477 | -1.686830 | 6 | -0.325209 | 3.929278  | 0.054642  |
| 6 | -5.141857 | 0.332369  | -1.277644 | 6 | 1.811784  | 4.684048  | 1.279312  |
| 6 | -4.380898 | 1.453041  | -1.010105 | 1 | 1.268968  | 5.596944  | 1.557901  |
| 1 | -4.870038 | 2.406570  | -0.787708 | 1 | 2.498079  | 4.463348  | 2.109328  |
| 6 | -2.963423 | 1.392087  | -0.979499 | 1 | 2.410233  | 4.897921  | 0.383382  |
| 6 | -2.248676 | 2.567542  | -0.583572 | 6 | 0.246624  | 3.089707  | 2.418021  |
| 1 | -2.854051 | 3.477437  | -0.496911 | 1 | 1.045862  | 2.635531  | 3.022570  |
| 6 | 2.732746  | 2.088329  | 0.597221  | 1 | -0.151680 | 3.950400  | 2.972884  |
| 1 | 3.326000  | 2.798304  | 1.184689  | 1 | -0.547897 | 2.344699  | 2.288465  |
| 6 | 3.466943  | 0.973126  | 0.081521  | 6 | -1.302772 | 4.938604  | 0.671701  |
| 6 | 4.864073  | 0.924140  | 0.333167  | 1 | -1.896529 | 4.497569  | 1.484158  |
| 1 | 5.318686  | 1.724986  | 0.924710  | 1 | -0.752545 | 5.799216  | 1.074379  |
| 6 | 5.645852  | -0.101674 | -0.156946 | 1 | -1.993202 | 5.334944  | -0.086320 |
| 6 | 5.002636  | -1.098596 | -0.937067 | 6 | 0.255798  | 4.508831  | -1.250447 |
| 1 | 5.630075  | -1.895016 | -1.336135 | 1 | -0.546857 | 4.606834  | -1.995897 |
| 6 | 3.643140  | -1.119241 | -1.221891 | 1 | 0.689560  | 5.504438  | -1.083163 |
| 6 | 2.827759  | -0.060873 | -0.676704 | 1 | 1.031291  | 3.847649  | -1.663709 |
| 6 | -2.378014 | -2.383109 | -1.681093 | 6 | 7.142275  | -0.169380 | 0.109077  |
| 6 | -1.590658 | -2.688678 | -0.383162 | 6 | 7.959384  | -0.075960 | -1.190697 |
| 1 | -2.279401 | -2.773839 | 0.473781  | 6 | 7.521831  | -1.425203 | 0.912208  |
| 1 | -0.860482 | -1.898706 | -0.172870 | 1 | 7.399238  | 0.709185  | 0.726087  |
| 1 | -1.050881 | -3.644215 | -0.477608 | 1 | 7.714162  | 0.840300  | -1.750508 |
| 6 | -1.422004 | -2.373748 | -2.895656 | 1 | 9.039944  | -0.067767 | -0.973433 |
| 1 | -0.634958 | -1.621977 | -2.775989 | 1 | 7.760338  | -0.936799 | -1.850442 |
| 1 | -1.979621 | -2.159759 | -3.822156 | 1 | 6.965994  | -1.474375 | 1.861962  |
| 1 | -0.943810 | -3.360603 | -3.007628 | 1 | 7.299904  | -2.344062 | 0.344298  |
| 6 | -3.392342 | -3.522079 | -1.891814 | 1 | 8.599400  | -1.430757 | 1.144020  |
| 1 | -3.985823 | -3.381049 | -2.808970 | 6 | -6.662376 | 0.374203  | -1.271730 |
| 1 | -4.087619 | -3.623079 | -1.043362 | 6 | -7.243229 | -0.469411 | -0.123483 |
| 1 | -2.852278 | -4.476670 | -1.990205 | 6 | -7.257001 | -0.047072 | -2.625612 |
| 6 | 3.012498  | -2.218038 | -2.099686 | 1 | -6.954670 | 1.423421  | -1.092460 |
| 6 | 4.060674  | -3.228766 | -2.600695 | 1 | -6.844196 | -0.143080 | 0.850300  |
| 1 | 4.550315  | -3.763315 | -1.771161 | 1 | -8.341805 | -0.385838 | -0.090846 |
| 1 | 4.842053  | -2.748629 | -3.210658 | 1 | -6.994431 | -1.536505 | -0.248617 |
| 1 | 3.565740  | -3.982913 | -3.232228 | 1 | -6.865424 | 0.576877  | -3.444352 |
| 6 | 1.954030  | -2.999452 | -1.289447 | 1 | -7.016711 | -1.097687 | -2.858727 |
| 1 | 1.135154  | -2.343361 | -0.980402 | 1 | -8.355086 | 0.047106  | -2.616131 |
| 1 | 2.405990  | -3.454452 | -0.392734 | 6 | -2.205272 | -0.946702 | 2.798976  |
| 1 | 1.526505  | -3.809249 | -1.902828 | 6 | -2.489704 | -1.949422 | 3.726797  |
| 6 | 2.350895  | -1.570271 | -3.339481 | 6 | -1.478486 | -2.793509 | 4.215306  |

6 -0.165489 -2.596879 3.754998  
6 0.127055 -1.597471 2.827770  
1 -3.522616 -2.062931 4.059874  
1 0.652151 -3.225095 4.111206  
6 -1.797600 -3.898278 5.179310  
1 -0.935162 -4.139594 5.816298  
1 -2.657877 -3.643535 5.813959  
1 -2.059801 -4.810024 4.615351  
6 1.473628 -1.315615 2.247724  
1 1.755717 -0.266735 2.422155  
1 2.225896 -1.978780 2.689467  
1 1.444523 -1.458418 1.158464  
6 -3.215792 -0.028989 2.192067  
1 -2.846521 1.004914 2.170607  
1 -3.410819 -0.327112 1.150139  
1 -4.155162 -0.079997 2.754997  
7 -0.917451 -0.851243 2.438260  
9 -0.584345 0.185778 1.336624

-----  
**Structure S7. <sup>2</sup>INT1**  
-----

27 0.298207 1.251358 -0.245436  
8 -0.942363 0.234447 -1.183871  
8 1.574156 0.008094 -0.797542  
7 -0.836749 2.769881 -0.183793  
7 1.590238 2.380870 0.564916  
6 -2.237521 0.336848 -1.123533  
6 -3.060183 -0.798715 -1.458158  
6 -4.438177 -0.629523 -1.407395  
1 -5.074857 -1.482288 -1.639605  
6 -5.087409 0.583425 -1.057169  
6 -4.291369 1.667664 -0.743762  
1 -4.748424 2.620301 -0.460823  
6 -2.877844 1.564535 -0.750482  
6 -2.117253 2.722235 -0.394316  
1 -2.691659 3.650472 -0.298601  
6 2.838392 2.065924 0.741388  
1 3.465905 2.767292 1.302641  
6 3.521196 0.908695 0.249408  
6 4.903325 0.778190 0.540225  
1 5.379324 1.525245 1.182236  
6 5.645320 -0.265133 0.022812  
6 4.981925 -1.178800 -0.836636  
1 5.581058 -1.984907 -1.258445

6 3.634643 -1.110265 -1.172002  
6 2.858548 -0.052953 -0.577844  
6 -2.418061 -2.157940 -1.792702  
6 -1.632716 -2.650067 -0.554958  
1 -2.318559 -2.839634 0.285008  
1 -0.890900 -1.909740 -0.235718  
1 -1.108237 -3.590872 -0.784162  
6 -1.474393 -2.025485 -3.010657  
1 -0.650279 -1.333521 -2.807098  
1 -2.029375 -1.666119 -3.892596  
1 -1.043303 -3.008910 -3.258731  
6 -3.473555 -3.225801 -2.134257  
1 -4.069471 -2.949808 -3.018648  
1 -4.163412 -3.412639 -1.296275  
1 -2.966478 -4.176786 -2.359269  
6 2.983357 -2.119133 -2.137308  
6 4.005227 -3.133002 -2.684520  
1 4.450096 -3.746004 -1.884823  
1 4.820835 -2.642451 -3.238903  
1 3.497903 -3.818778 -3.380536  
6 1.878043 -2.910231 -1.403730  
1 1.085684 -2.245210 -1.049217  
1 2.294280 -3.455249 -0.541000  
1 1.423153 -3.646919 -2.085492  
6 2.378489 -1.362239 -3.343903  
1 3.165024 -0.823924 -3.897314  
1 1.618061 -0.639871 -3.022932  
1 1.903421 -2.076211 -4.035975  
6 1.014355 3.647939 1.114441  
6 -0.105347 4.042779 0.079516  
6 2.073314 4.751208 1.252141  
1 1.586176 5.711234 1.467543  
1 2.747719 4.547247 2.095799  
1 2.678362 4.867108 0.342776  
6 0.420670 3.328862 2.499488  
1 1.211278 2.915310 3.143143  
1 0.037290 4.241277 2.976380  
1 -0.375002 2.578491 2.422620  
6 -1.026156 5.146093 0.614913  
1 -1.637271 4.804124 1.461025  
1 -0.426547 6.003023 0.948441  
1 -1.695889 5.518140 -0.173485  
6 0.505946 4.491382 -1.263690  
1 -0.290045 4.571625 -2.017944

1 0.984962 5.475217 -1.166387  
 1 1.253399 3.770533 -1.626536  
 6 7.122589 -0.433372 0.342205  
 6 7.996309 -0.336831 -0.919825  
 6 7.389431 -1.742995 1.103751  
 1 7.404862 0.401358 1.006649  
 1 7.827785 0.613433 -1.450408  
 1 9.064861 -0.399830 -0.657903  
 1 7.778396 -1.158670 -1.621798  
 1 6.792381 -1.796247 2.027748  
 1 7.135926 -2.621258 0.487123  
 1 8.453950 -1.824664 1.376781  
 6 -6.604585 0.660663 -0.999853  
 6 -7.167273 -0.250215 0.105374  
 6 -7.250055 0.350519 -2.360532  
 1 -6.864118 1.700611 -0.737359  
 1 -6.727909 -0.004721 1.085253  
 1 -8.261296 -0.141979 0.181361  
 1 -6.951307 -1.310994 -0.104684  
 1 -6.867531 1.021137 -3.145884  
 1 -7.047191 -0.686797 -2.674135  
 1 -8.343952 0.472012 -2.307340  
 6 -2.358254 -1.214169 2.643078  
 6 -2.816141 -2.458761 3.106758  
 6 -1.917789 -3.517871 3.289528  
 6 -0.555995 -3.297376 3.010067  
 6 -0.120524 -2.047405 2.560908  
 1 -3.882330 -2.584347 3.306088  
 1 0.176093 -4.097473 3.137065  
 6 -2.382896 -4.870237 3.755212  
 1 -1.820506 -5.187618 4.647475  
 1 -3.454620 -4.875500 3.995723  
 1 -2.199013 -5.625363 2.973595  
 6 1.294535 -1.702337 2.213828  
 1 1.640366 -0.858440 2.829035  
 1 1.957634 -2.563551 2.361796  
 1 1.339956 -1.371316 1.168547  
 6 -3.255249 -0.050934 2.344907  
 1 -2.675035 0.877560 2.307789  
 1 -3.721504 -0.195648 1.357568  
 1 -4.058430 0.020335 3.091414  
 7 -1.055267 -1.108270 2.432757  
 9 -0.372932 0.558421 1.462892

**Structure S8. Co<sup>III</sup>(salen)-F**

-----  
 27 -0.032545 0.823376 0.122776  
 8 -1.280082 -0.520958 -0.249874  
 8 1.298749 -0.426069 -0.301842  
 7 -1.242191 2.213880 -0.440976  
 7 1.239428 2.247486 0.287558  
 6 -2.568379 -0.418022 -0.147660  
 6 -3.353023 -1.597302 0.122593  
 6 -4.735494 -1.468364 0.120539  
 1 -5.341064 -2.352135 0.321530  
 6 -5.427298 -0.249631 -0.112870  
 6 -4.668326 0.882802 -0.329584  
 1 -5.158401 1.847886 -0.492048  
 6 -3.249298 0.831127 -0.332127  
 6 -2.526600 2.047696 -0.547072  
 1 -3.141612 2.914507 -0.817533  
 6 2.520058 2.084177 0.367147  
 1 3.144662 2.971756 0.522416  
 6 3.246648 0.850633 0.235299  
 6 4.653602 0.886150 0.402196  
 1 5.126090 1.833557 0.680043  
 6 5.427426 -0.244991 0.221104  
 6 4.760749 -1.439333 -0.150316  
 1 5.375722 -2.328001 -0.290852  
 6 3.386660 -1.545679 -0.340529  
 6 2.589777 -0.364446 -0.134837  
 6 -2.646151 -2.926635 0.445032  
 6 -1.768607 -2.730559 1.707391  
 1 -2.407426 -2.546437 2.586893  
 1 -1.082517 -1.880624 1.602805  
 1 -1.176737 -3.639851 1.902489  
 6 -1.779522 -3.379039 -0.753971  
 1 -0.994411 -2.649273 -0.979141  
 1 -2.405445 -3.515003 -1.651609  
 1 -1.298015 -4.344478 -0.527529  
 6 -3.650647 -4.055470 0.742018  
 1 -4.292742 -4.276728 -0.125699  
 1 -4.299800 -3.819122 1.599961  
 1 -3.099976 -4.976598 0.989465  
 6 2.713593 -2.877615 -0.725432  
 6 3.741281 -4.009699 -0.909167  
 1 4.302331 -4.215098 0.016244  
 1 4.465288 -3.786184 -1.709031

1 3.215826 -4.936540 -1.187777  
6 1.737445 -3.300703 0.397507  
1 0.952220 -2.551496 0.547575  
1 2.278988 -3.440336 1.347430  
1 1.253125 -4.256488 0.138665  
6 1.946881 -2.719150 -2.060139  
1 2.638390 -2.445110 -2.874040  
1 1.171848 -1.947419 -1.982114  
1 1.463272 -3.671851 -2.332204  
6 0.582810 3.583962 0.363207  
6 -0.558196 3.503920 -0.727103  
6 1.556801 4.737245 0.091616  
1 1.005724 5.685255 0.037567  
1 2.278901 4.840885 0.914154  
1 2.115570 4.608798 -0.845659  
6 -0.001079 3.729383 1.782209  
1 0.819381 3.670280 2.512653  
1 -0.495498 4.703414 1.901989  
1 -0.697794 2.912450 2.004289  
6 -1.508191 4.705701 -0.667571  
1 -2.078732 4.740022 0.270541  
1 -0.938536 5.639550 -0.760408  
1 -2.218910 4.686054 -1.506295  
6 0.032907 3.386660 -2.146457  
1 -0.774984 3.169426 -2.860478  
1 0.517683 4.323821 -2.453361  
1 0.768232 2.570590 -2.202344  
6 6.937689 -0.221099 0.404883  
6 7.677262 -0.547736 -0.903710  
6 7.389826 -1.151874 1.542881  
1 7.210443 0.809517 0.691498  
1 7.382982 0.141712 -1.710752  
1 8.768390 -0.471419 -0.766644  
1 7.455965 -1.574018 -1.241052  
1 6.887788 -0.897106 2.489509  
1 7.157973 -2.205000 1.312335  
1 8.478489 -1.078344 1.699627  
6 -6.948024 -0.205715 -0.098362  
6 -7.517496 -0.582075 1.280210  
6 -7.555125 -1.083470 -1.205956  
1 -7.241451 0.838415 -0.304188  
1 -7.110960 0.068701 2.070308  
1 -8.615905 -0.489276 1.288626  
1 -7.270470 -1.624156 1.543004

1 -7.177195 -0.791386 -2.198458  
1 -7.308393 -2.147170 -1.051974  
1 -8.653935 -0.996022 -1.216613  
9 -0.316155 0.702944 1.963454

-----  
**Structure S9. [Me<sub>3</sub>MPy]<sup>+</sup>**  
-----

6 -0.706973 1.214048 0.001197  
6 0.700692 1.211742 -0.008817  
6 1.414863 0.001882 -0.012635  
6 0.703725 -1.209807 -0.009155  
6 -0.703864 -1.215750 0.001079  
1 1.208368 2.178794 -0.016228  
1 1.213987 -2.175498 -0.015878  
6 2.917677 0.003406 0.005758  
1 3.268768 -0.001110 1.051678  
1 3.326005 -0.889950 -0.486393  
1 3.324447 0.901747 -0.478453  
6 -1.576041 -2.436383 0.000064  
1 -2.220592 -2.438446 -0.891966  
1 -0.953231 -3.338352 0.000589  
1 -2.223457 -2.438354 0.889854  
6 -1.582235 2.432486 -0.000162  
1 -2.234657 2.427648 -0.886374  
1 -2.221736 2.438228 0.895387  
1 -0.961605 3.335906 -0.010137  
7 -1.219052 -0.001479 0.011992

-----  
**Structure S10. [Co<sup>IV</sup>(salen)-F]<sup>+</sup>**  
-----

27 0.005796 0.842430 0.165175  
8 -1.289040 -0.530227 -0.154145  
8 1.288335 -0.372255 -0.376199  
7 -1.210870 2.235614 -0.480841  
7 1.251107 2.254671 0.332282  
6 -2.549764 -0.425555 -0.105900  
6 -3.355282 -1.623788 0.139823  
6 -4.733664 -1.483032 0.110558  
1 -5.356561 -2.357079 0.290735  
6 -5.390655 -0.253015 -0.131261  
6 -4.605415 0.902548 -0.337696  
1 -5.104379 1.857294 -0.522239  
6 -3.218182 0.852037 -0.312508  
6 -2.487198 2.085648 -0.543037

|   |           |           |           |                                         |           |           |           |
|---|-----------|-----------|-----------|-----------------------------------------|-----------|-----------|-----------|
| 1 | -3.115466 | 2.951796  | -0.782785 | 1                                       | 0.744114  | 3.631296  | 2.559892  |
| 6 | 2.535816  | 2.092338  | 0.354359  | 1                                       | -0.519136 | 4.708550  | 1.918998  |
| 1 | 3.161379  | 2.981387  | 0.487318  | 1                                       | -0.777820 | 2.929368  | 1.991516  |
| 6 | 3.253288  | 0.860049  | 0.193705  | 6                                       | -1.461302 | 4.730031  | -0.707149 |
| 6 | 4.657728  | 0.876204  | 0.358595  | 1                                       | -2.042040 | 4.787397  | 0.223615  |
| 1 | 5.146259  | 1.813706  | 0.638660  | 1                                       | -0.885593 | 5.658327  | -0.812066 |
| 6 | 5.410056  | -0.271866 | 0.178200  | 1                                       | -2.159203 | 4.696250  | -1.556334 |
| 6 | 4.723327  | -1.459290 | -0.178641 | 6                                       | 0.123577  | 3.400387  | -2.132860 |
| 1 | 5.323058  | -2.359282 | -0.308480 | 1                                       | -0.662119 | 3.200566  | -2.875405 |
| 6 | 3.347135  | -1.547942 | -0.363779 | 1                                       | 0.629005  | 4.333850  | -2.414277 |
| 6 | 2.581108  | -0.345974 | -0.182497 | 1                                       | 0.850295  | 2.576339  | -2.170990 |
| 6 | -2.664099 | -2.949704 | 0.465669  | 6                                       | 6.919082  | -0.274004 | 0.361287  |
| 6 | -1.809951 | -2.767593 | 1.749928  | 6                                       | 7.648825  | -0.646776 | -0.940546 |
| 1 | -2.462976 | -2.575161 | 2.616018  | 6                                       | 7.346965  | -1.189616 | 1.521178  |
| 1 | -1.098669 | -1.936627 | 1.670329  | 1                                       | 7.212861  | 0.756472  | 0.624693  |
| 1 | -1.247406 | -3.693215 | 1.947219  | 1                                       | 7.367544  | 0.028255  | -1.763996 |
| 6 | -1.781452 | -3.389746 | -0.730380 | 1                                       | 8.740357  | -0.585675 | -0.803089 |
| 1 | -0.978149 | -2.675432 | -0.936660 | 1                                       | 7.410664  | -1.677227 | -1.251985 |
| 1 | -2.394007 | -3.508143 | -1.638437 | 1                                       | 6.849806  | -0.902538 | 2.460911  |
| 1 | -1.322071 | -4.363915 | -0.502561 | 1                                       | 7.094300  | -2.242429 | 1.313155  |
| 6 | -3.683584 | -4.072041 | 0.733621  | 1                                       | 8.436366  | -1.133702 | 1.676727  |
| 1 | -4.309811 | -4.281648 | -0.147639 | 6                                       | -6.899975 | -0.175564 | -0.157424 |
| 1 | -4.342599 | -3.840457 | 1.584681  | 6                                       | -7.501646 | -0.558940 | 1.208854  |
| 1 | -3.141137 | -4.996817 | 0.980371  | 6                                       | -7.482889 | -1.042192 | -1.290484 |
| 6 | 2.650367  | -2.876941 | -0.709687 | 1                                       | -7.171287 | 0.872861  | -0.361594 |
| 6 | 3.659174  | -4.030301 | -0.863176 | 1                                       | -7.098131 | 0.071051  | 2.016084  |
| 1 | 4.221843  | -4.215932 | 0.065089  | 1                                       | -8.594713 | -0.429373 | 1.183453  |
| 1 | 4.380272  | -3.844267 | -1.674767 | 1                                       | -7.294419 | -1.611640 | 1.458985  |
| 1 | 3.116188  | -4.955888 | -1.108767 | 1                                       | -7.071258 | -0.752774 | -2.269405 |
| 6 | 1.679631  | -3.246836 | 0.436900  | 1                                       | -7.268784 | -2.111021 | -1.130596 |
| 1 | 0.912548  | -2.478043 | 0.581009  | 1                                       | -8.576648 | -0.921263 | -1.326824 |
| 1 | 2.229971  | -3.372995 | 1.383038  | 9                                       | -0.361098 | 0.682484  | 1.959937  |
| 1 | 1.171487  | -4.197489 | 0.209933  | -----                                   |           |           |           |
| 6 | 1.880451  | -2.747479 | -2.045564 | <b>Structure S11. Me<sub>3</sub>MPy</b> |           |           |           |
| 1 | 2.573077  | -2.513121 | -2.870220 | -----                                   |           |           |           |
| 1 | 1.117825  | -1.960981 | -1.997384 | 6                                       | -0.704642 | 1.155926  | 0.000672  |
| 1 | 1.380478  | -3.700443 | -2.282823 | 6                                       | 0.697293  | 1.195908  | -0.010298 |
| 6 | 0.585806  | 3.592062  | 0.403228  | 6                                       | 1.428830  | 0.000984  | -0.013439 |
| 6 | -0.514253 | 3.528162  | -0.734596 | 6                                       | 0.698837  | -1.194917 | -0.010158 |
| 6 | 1.568495  | 4.746959  | 0.181229  | 6                                       | -0.703120 | -1.156755 | 0.000807  |
| 1 | 1.018159  | 5.695988  | 0.148306  | 1                                       | 1.215465  | 2.158355  | -0.018392 |
| 1 | 2.273335  | 4.821960  | 1.021420  | 1                                       | 1.218267  | -2.156692 | -0.018178 |
| 1 | 2.142123  | 4.648200  | -0.750093 | 6                                       | 2.935216  | 0.001718  | 0.008926  |
| 6 | -0.046779 | 3.724027  | 1.801847  | 1                                       | 3.302903  | -0.004549 | 1.049717  |

1 3.347417 -0.889185 -0.488422  
 1 3.346627 0.898815 -0.477744  
 6 -1.525491 -2.421611 0.002596  
 1 -2.177889 -2.453245 -0.885415  
 1 -0.898276 -3.324360 0.009577  
 1 -2.186771 -2.444678 0.884082  
 6 -1.528646 2.419712 0.002653  
 1 -2.183440 2.449100 -0.883644  
 1 -2.187606 2.443308 0.885882  
 1 -0.902589 3.323283 0.006695  
 7 -1.383397 -0.000849 0.006468

-----  
**Structure S12. <sup>4</sup>TS2**  
 -----

27 -0.268916 -1.232144 0.582679  
 8 -1.534644 -0.009457 1.156696  
 8 1.039344 -0.136486 1.392280  
 7 -1.553642 -2.587125 0.281154  
 7 1.004521 -2.528562 0.017695  
 6 -2.807065 0.022117 0.891796  
 6 -3.530838 1.260366 1.029851  
 6 -4.902644 1.224631 0.820047  
 1 -5.467599 2.150506 0.922513  
 6 -5.632815 0.058617 0.464811  
 6 -4.924377 -1.114111 0.294399  
 1 -5.442243 -2.031253 -0.000554  
 6 -3.518753 -1.153664 0.482029  
 6 -2.841422 -2.393851 0.280462  
 1 -3.489524 -3.259798 0.107796  
 6 2.276411 -2.305963 -0.048152  
 1 2.910830 -3.063152 -0.523194  
 6 2.980534 -1.152557 0.448263  
 6 4.375703 -1.101602 0.249564  
 1 4.858051 -1.894424 -0.328709  
 6 5.140266 -0.073674 0.780568  
 6 4.478392 0.913977 1.559884  
 1 5.094553 1.708115 1.977816  
 6 3.114720 0.934185 1.804536  
 6 2.313973 -0.121306 1.211847  
 6 -2.779307 2.567452 1.337324  
 6 -1.782058 2.839251 0.184342  
 1 -2.325439 3.008404 -0.758157  
 1 -1.093123 1.999735 0.030563  
 1 -1.187213 3.741148 0.399340

6 -2.040566 2.461468 2.692242  
 1 -1.291542 1.662234 2.684404  
 1 -2.757618 2.264986 3.506027  
 1 -1.527937 3.410903 2.914897  
 6 -3.734122 3.772613 1.423063  
 1 -4.468765 3.660872 2.236280  
 1 -4.281498 3.937256 0.481729  
 1 -3.150187 4.683359 1.627172  
 6 2.452990 2.038959 2.644394  
 6 3.490319 3.027505 3.207934  
 1 4.039675 3.552095 2.410621  
 1 4.220948 2.531412 3.866179  
 1 2.971518 3.792291 3.805579  
 6 1.472797 2.834496 1.752347  
 1 0.699591 2.186249 1.329015  
 1 2.011766 3.327702 0.928429  
 1 0.974412 3.616413 2.346351  
 6 1.697734 1.414940 3.842986  
 1 2.391093 0.851697 4.488367  
 1 0.899260 0.740445 3.512148  
 1 1.243252 2.214335 4.449654  
 6 0.384829 -3.733658 -0.614242  
 6 -0.950049 -3.951454 0.186613  
 6 1.310616 -4.955265 -0.541975  
 1 0.760539 -5.861246 -0.827884  
 1 2.145147 -4.861010 -1.250863  
 1 1.724037 -5.102280 0.465050  
 6 0.104445 -3.371141 -2.086271  
 1 1.047351 -3.087263 -2.575627  
 1 -0.310537 -4.233630 -2.624615  
 1 -0.582624 -2.518855 -2.160808  
 6 -1.880067 -4.955236 -0.506738  
 1 -2.268741 -4.573096 -1.460227  
 1 -1.338630 -5.889453 -0.704986  
 1 -2.730704 -5.216643 0.138257  
 6 -0.672898 -4.422459 1.629602  
 1 -1.609575 -4.405898 2.205643  
 1 -0.287767 -5.451229 1.636234  
 1 0.054531 -3.772584 2.139642  
 6 6.633788 0.014807 0.528925  
 6 7.440929 0.027504 1.838008  
 6 6.970275 1.233891 -0.349817  
 1 6.920857 -0.889931 -0.032850  
 1 7.210944 -0.852824 2.458131

|    |           |           |           |   |           |           |           |
|----|-----------|-----------|-----------|---|-----------|-----------|-----------|
| 1  | 8.520562  | 0.022308  | 1.620007  | 7 | 1.268863  | 2.283592  | 0.221786  |
| 1  | 7.228773  | 0.928960  | 2.435495  | 6 | -2.575519 | -0.373175 | -0.006988 |
| 1  | 6.429548  | 1.197607  | -1.308276 | 6 | -3.350223 | -1.581473 | 0.168181  |
| 1  | 6.701208  | 2.176313  | 0.154907  | 6 | -4.730956 | -1.466441 | 0.102628  |
| 1  | 8.050070  | 1.265509  | -0.565500 | 1 | -5.334474 | -2.364984 | 0.222718  |
| 6  | -7.138561 | 0.120522  | 0.264201  | 6 | -5.427281 | -0.245466 | -0.107148 |
| 6  | -7.520072 | 1.055897  | -0.895918 | 6 | -4.678805 | 0.911507  | -0.237898 |
| 6  | -7.866570 | 0.516283  | 1.560167  | 1 | -5.178517 | 1.873542  | -0.382003 |
| 1  | -7.469230 | -0.897001 | -0.006297 | 6 | -3.266527 | 0.877665  | -0.181460 |
| 1  | -7.022718 | 0.755147  | -1.831378 | 6 | -2.556466 | 2.114293  | -0.302878 |
| 1  | -8.608926 | 1.040356  | -1.064449 | 1 | -3.182945 | 2.994612  | -0.482104 |
| 1  | -7.232706 | 2.098318  | -0.680494 | 6 | 2.556438  | 2.114290  | 0.302921  |
| 1  | -7.622195 | -0.174431 | 2.382410  | 1 | 3.182904  | 2.994608  | 0.482196  |
| 1  | -7.587946 | 1.533912  | 1.880352  | 6 | 3.266509  | 0.877667  | 0.181526  |
| 1  | -8.958366 | 0.502133  | 1.411680  | 6 | 4.678784  | 0.911511  | 0.238070  |
| 9  | -0.145664 | -0.355593 | -1.182566 | 1 | 5.178482  | 1.873542  | 0.382253  |
| 8  | 1.062484  | 1.374889  | -3.583292 | 6 | 5.427271  | -0.245454 | 0.107324  |
| 14 | -0.294894 | 2.387338  | -3.564776 | 6 | 4.730964  | -1.466422 | -0.102559 |
| 1  | -0.114306 | 3.342959  | -2.431377 | 1 | 5.334494  | -2.364957 | -0.222645 |
| 14 | 2.196248  | 0.758372  | -2.551395 | 6 | 3.350237  | -1.581455 | -0.168220 |
| 1  | 1.242637  | 0.073671  | -1.441168 | 6 | 2.575517  | -0.373166 | 0.006948  |
| 6  | -0.310553 | 3.305567  | -5.196885 | 6 | -2.654224 | -2.926372 | 0.440848  |
| 1  | -1.169657 | 3.995511  | -5.239964 | 6 | -1.843513 | -2.817829 | 1.755160  |
| 1  | 0.611328  | 3.893908  | -5.330764 | 1 | -2.513735 | -2.614434 | 2.605872  |
| 1  | -0.396231 | 2.598607  | -6.038321 | 1 | -1.094497 | -2.018421 | 1.701977  |
| 6  | -1.828636 | 1.346475  | -3.306532 | 1 | -1.319048 | -3.766139 | 1.953223  |
| 1  | -1.724943 | 0.767941  | -2.376720 | 6 | -1.722767 | -3.290498 | -0.738331 |
| 1  | -2.725399 | 1.984127  | -3.238535 | 1 | -0.937117 | -2.540956 | -0.875242 |
| 1  | -1.965317 | 0.644263  | -4.145404 | 1 | -2.298423 | -3.375773 | -1.674231 |
| 6  | 3.225685  | 2.104231  | -1.765590 | 1 | -1.238624 | -4.261677 | -0.548022 |
| 1  | 3.852106  | 2.573129  | -2.543470 | 6 | -3.667743 | -4.073423 | 0.609392  |
| 1  | 2.577064  | 2.874160  | -1.322683 | 1 | -4.268341 | -4.231616 | -0.300201 |
| 1  | 3.881583  | 1.700648  | -0.981988 | 1 | -4.354319 | -3.901370 | 1.453124  |
| 6  | 3.153204  | -0.609966 | -3.387938 | 1 | -3.124056 | -5.008771 | 0.812389  |
| 1  | 3.861051  | -1.078308 | -2.687763 | 6 | 2.654261  | -2.926347 | -0.440979 |
| 1  | 2.471452  | -1.380205 | -3.779337 | 6 | 3.667795  | -4.073390 | -0.609488 |
| 1  | 3.725190  | -0.187690 | -4.231450 | 1 | 4.268326  | -4.231615 | 0.300143  |

-----  
**Structure S13.** [Co<sup>III</sup>(salen)]<sup>+</sup>  
 -----

|    |           |           |           |   |          |           |           |
|----|-----------|-----------|-----------|---|----------|-----------|-----------|
| 27 | -0.000006 | 0.912577  | -0.000041 | 1 | 4.354433 | -3.901303 | -1.453164 |
| 8  | -1.282651 | -0.432635 | -0.009317 | 1 | 3.124126 | -5.008732 | -0.812559 |
| 8  | 1.282649  | -0.432626 | 0.009172  | 6 | 1.722728 | -3.290501 | 0.738130  |
| 7  | -1.268887 | 2.283590  | -0.221828 | 1 | 0.937080 | -2.540952 | 0.875014  |
|    |           |           |           | 1 | 2.298324 | -3.375813 | 1.674063  |
|    |           |           |           | 1 | 1.238582 | -4.261667 | 0.547760  |
|    |           |           |           | 6 | 1.843631 | -2.817775 | -1.755340 |

1 2.513903 -2.614347 -2.606004  
 1 1.094600 -2.018380 -1.702181  
 1 1.319194 -3.766089 -1.953462  
 6 0.639105 3.618907 0.459770  
 6 -0.639126 3.618893 -0.459858  
 6 1.585627 4.780693 0.132309  
 1 1.033024 5.728994 0.145113  
 1 2.377777 4.871212 0.888779  
 1 2.056759 4.668736 -0.853619  
 6 0.254835 3.670879 1.952691  
 1 1.150625 3.498834 2.566852  
 1 -0.153932 4.655923 2.215983  
 1 -0.488969 2.900490 2.206391  
 6 -1.585642 4.780698 -0.132447  
 1 -2.056766 4.668797 0.853490  
 1 -1.033035 5.728996 -0.145307  
 1 -2.377797 4.871178 -0.888916  
 6 -0.254855 3.670806 -1.952782  
 1 -1.150645 3.498727 -2.566933  
 1 0.153903 4.655843 -2.216113  
 1 0.488956 2.900415 -2.206454  
 6 6.944651 -0.223962 0.170774  
 6 7.574060 -0.680762 -1.156939  
 6 7.472515 -1.055579 1.352890  
 1 7.245579 0.823993 0.339341  
 1 7.220526 -0.065819 -1.999277  
 1 8.671956 -0.601520 -1.109935  
 1 7.325890 -1.732005 -1.377498  
 1 7.045750 -0.709622 2.307281  
 1 7.220674 -2.122523 1.236307  
 1 8.569606 -0.978463 1.418434  
 6 -6.944665 -0.223974 -0.170490  
 6 -7.573982 -0.680850 1.157240  
 6 -7.472607 -1.055524 -1.352618  
 1 -7.245607 0.823990 -0.338977  
 1 -7.220389 -0.065957 1.999589  
 1 -8.671882 -0.601602 1.110316  
 1 -7.325800 -1.732107 1.377721  
 1 -7.045912 -0.709510 -2.307018  
 1 -7.220752 -2.122474 -1.236114  
 1 -8.569704 -0.978411 -1.418080

---

**Structure S14. HF**

---

9 0.000000 0.000000 0.092769  
 1 0.000000 0.000000 -0.834923

---

**Structure S15. R<sub>3</sub>Si<sup>+</sup>**

---

8 0.032529 -0.356475 -0.216825  
 14 1.575355 -0.046691 -0.011579  
 14 -1.658209 -0.041970 -0.418378  
 1 -1.843511 -0.056033 -1.892440  
 6 2.113993 1.703162 0.086690  
 1 3.210141 1.782519 0.065512  
 1 1.673555 2.275505 -0.745567  
 1 1.735872 2.136534 1.028926  
 6 2.713809 -1.473554 0.114160  
 1 2.162277 -2.423455 0.127697  
 1 3.400161 -1.452052 -0.750427  
 1 3.328513 -1.372505 1.024118  
 6 -2.008014 1.634760 0.321688  
 1 -1.769819 1.644469 1.397780  
 1 -1.422637 2.423586 -0.176796  
 1 -3.077030 1.879302 0.207430  
 6 -2.539036 -1.451341 0.423248  
 1 -3.628811 -1.345617 0.294476  
 1 -2.233430 -2.419127 -0.004585  
 1 -2.320082 -1.458214 1.503147

---

**Structure S16. 1**

---

6 1.308212 0.570092 -0.053265  
 6 0.291669 1.475139 0.284902  
 6 -1.025857 1.033427 0.451139  
 6 -1.367126 -0.315130 0.294323  
 6 -0.343100 -1.216413 -0.034931  
 6 0.977017 -0.798252 -0.209215  
 1 0.517455 2.534111 0.410984  
 1 -1.803119 1.760575 0.701124  
 1 -0.552870 -2.280770 -0.168266  
 8 1.919756 -1.719470 -0.579803  
 8 2.607733 0.904943 -0.261716  
 6 2.927414 -2.017433 0.382454  
 1 2.480406 -2.400741 1.317834  
 1 3.563488 -2.800035 -0.054725  
 1 3.545153 -1.134911 0.612738  
 6 3.003550 2.256325 -0.117152

1 2.824504 2.627663 0.907546  
 1 4.080755 2.289758 -0.326553  
 1 2.477856 2.913878 -0.831913  
 6 -2.803849 -0.778018 0.472103  
 1 -2.837503 -1.877181 0.378606  
 1 -3.153643 -0.534588 1.490286  
 6 -3.740004 -0.164681 -0.537809  
 6 -4.791013 0.608053 -0.245757  
 1 -3.501677 -0.375438 -1.588446  
 1 -5.428513 1.028957 -1.028884  
 1 -5.053690 0.846262 0.791068

---

**Structure S17. 2**

---

6 1.266238 0.549313 0.049851  
 6 0.220317 1.484169 0.206276  
 6 -1.077997 1.046836 0.362450  
 6 -1.412496 -0.350985 0.381832  
 6 -0.402988 -1.277190 0.223113  
 6 0.944774 -0.877059 0.053733  
 1 0.439091 2.550700 0.204461  
 1 -1.881122 1.778390 0.474251  
 1 -0.603296 -2.349600 0.227439  
 8 1.810353 -1.850722 -0.084871  
 8 2.533767 0.862568 -0.101094  
 6 3.235825 -1.735645 -0.267845  
 1 3.690194 -1.232698 0.595524  
 1 3.590006 -2.769001 -0.346247  
 1 3.457466 -1.176843 -1.186194  
 6 2.979574 2.230076 -0.114730  
 1 2.730465 2.717093 0.839368  
 1 4.065600 2.182908 -0.244886  
 1 2.518297 2.769267 -0.954971  
 6 -2.856734 -0.753405 0.552887  
 1 -2.923687 -1.850116 0.628999  
 1 -3.232920 -0.331475 1.500815  
 6 -3.702046 -0.255132 -0.596272  
 6 -4.683782 0.645245 -0.484424  
 1 -3.454091 -0.672626 -1.579416  
 1 -5.262304 0.966545 -1.354993  
 1 -4.950776 1.085352 0.482350

---

**Structure S18. <sup>3</sup>TS3**

---

27 1.402034 1.096566 -0.235218  
 8 2.309813 -0.579416 -0.113996  
 8 -0.140161 0.937681 0.970571  
 7 3.157656 2.126977 -0.344500  
 7 0.680131 2.854867 -0.893054  
 6 3.568601 -0.847028 0.061424  
 6 3.977751 -2.217943 0.272118  
 6 5.328376 -2.481689 0.466666  
 1 5.641890 -3.511858 0.636050  
 6 6.341410 -1.491060 0.459211  
 6 5.946028 -0.183986 0.246358  
 1 6.698357 0.611917 0.228763  
 6 4.586119 0.171606 0.051520  
 6 4.314827 1.575116 -0.175509  
 1 5.219319 2.201667 -0.204169  
 6 -0.569347 3.176830 -0.842750  
 1 -0.911454 4.085298 -1.359720  
 6 -1.608619 2.494601 -0.098481  
 6 -2.925047 2.998034 -0.236372  
 1 -3.107049 3.785421 -0.975992  
 6 -3.970293 2.544384 0.549152  
 6 -3.662738 1.577188 1.535641  
 1 -4.478913 1.245989 2.176086  
 6 -2.394862 1.037095 1.736285  
 6 -1.323957 1.462568 0.864757  
 6 2.922182 -3.343474 0.279867  
 6 2.217627 -3.399632 -1.096288  
 1 2.939999 -3.640938 -1.893115  
 1 1.748770 -2.436826 -1.329207  
 1 1.437249 -4.179227 -1.096723  
 6 1.879705 -3.088067 1.394615  
 1 1.369142 -2.129347 1.248236  
 1 2.366494 -3.077124 2.383707  
 1 1.122550 -3.890107 1.399143  
 6 3.549161 -4.726301 0.538769  
 1 4.048915 -4.776400 1.519230  
 1 4.282683 -5.001131 -0.235762  
 1 2.758316 -5.493010 0.531213  
 6 -2.119216 0.035649 2.879433  
 6 -3.386864 -0.263115 3.702275  
 1 -4.174356 -0.729054 3.089088  
 1 -3.804819 0.643107 4.168248  
 1 -3.140010 -0.967754 4.511813  
 6 -1.600190 -1.311304 2.327103

|   |           |           |           |                         |           |           |           |
|---|-----------|-----------|-----------|-------------------------|-----------|-----------|-----------|
| 1 | -0.653497 | -1.178489 | 1.791744  | 1                       | 9.106486  | -2.691135 | 2.225842  |
| 1 | -2.333519 | -1.760916 | 1.639579  | 1                       | 0.797708  | 0.710414  | -1.595546 |
| 1 | -1.431932 | -2.019680 | 3.155377  | 6                       | -5.254805 | -3.256132 | -1.234447 |
| 6 | -1.067652 | 0.640367  | 3.839868  | 6                       | -4.148263 | -3.997104 | -1.665763 |
| 1 | -1.437817 | 1.581764  | 4.278215  | 6                       | -2.873386 | -3.413828 | -1.694240 |
| 1 | -0.127550 | 0.845742  | 3.312100  | 6                       | -2.668617 | -2.092503 | -1.289241 |
| 1 | -0.858821 | -0.059861 | 4.666152  | 6                       | -3.782354 | -1.355203 | -0.847963 |
| 6 | 1.716028  | 3.697084  | -1.532727 | 6                       | -5.057097 | -1.914273 | -0.820044 |
| 6 | 2.982709  | 3.578497  | -0.569138 | 1                       | -4.267675 | -5.030798 | -1.990376 |
| 6 | 1.267197  | 5.153976  | -1.715130 | 1                       | -2.025327 | -4.011698 | -2.039073 |
| 1 | 2.100680  | 5.771077  | -2.075238 | 1                       | -3.671617 | -0.325611 | -0.500302 |
| 1 | 0.473224  | 5.224539  | -2.473114 | 8                       | -6.121974 | -1.144876 | -0.428892 |
| 1 | 0.888036  | 5.594349  | -0.782471 | 8                       | -6.530407 | -3.719097 | -1.181893 |
| 6 | 2.030829  | 3.095858  | -2.916597 | 6                       | -6.685851 | -1.459501 | 0.840339  |
| 1 | 1.107065  | 3.045329  | -3.511844 | 1                       | -5.939408 | -1.334298 | 1.644942  |
| 1 | 2.751746  | 3.720258  | -3.462646 | 1                       | -7.509288 | -0.752252 | 1.007987  |
| 1 | 2.439758  | 2.080526  | -2.824655 | 1                       | -7.077783 | -2.488800 | 0.863909  |
| 6 | 4.225125  | 4.249538  | -1.171971 | 6                       | -6.793163 | -5.054611 | -1.569744 |
| 1 | 4.585162  | 3.723943  | -2.067672 | 1                       | -6.248450 | -5.778575 | -0.937879 |
| 1 | 4.011075  | 5.291757  | -1.442955 | 1                       | -7.872598 | -5.210020 | -1.442873 |
| 1 | 5.046980  | 4.278509  | -0.441612 | 1                       | -6.526085 | -5.232417 | -2.626548 |
| 6 | 2.676727  | 4.207643  | 0.805210  | 6                       | -1.294466 | -1.463194 | -1.320681 |
| 1 | 3.508963  | 3.999944  | 1.494369  | 1                       | -1.076912 | -0.998531 | -0.340807 |
| 1 | 2.559909  | 5.298199  | 0.730641  | 1                       | -0.520730 | -2.233269 | -1.458442 |
| 1 | 1.759837  | 3.778815  | 1.234424  | 6                       | -1.120768 | -0.370731 | -2.331134 |
| 6 | -5.363782 | 3.147951  | 0.432690  | 6                       | 0.082236  | -0.066482 | -2.888008 |
| 6 | -5.586740 | 4.215576  | 1.519848  | 1                       | -1.968073 | 0.309260  | -2.476079 |
| 6 | -6.485985 | 2.100545  | 0.461449  | 1                       | 0.180302  | 0.760270  | -3.595305 |
| 1 | -5.409879 | 3.657526  | -0.546084 | 1                       | 0.908812  | -0.782132 | -2.852844 |
| 1 | -4.820919 | 5.005542  | 1.466897  | -----                   |           |           |           |
| 1 | -6.578027 | 4.687921  | 1.416161  | <b>Structure S19. 3</b> |           |           |           |
| 1 | -5.531690 | 3.761988  | 2.524038  | -----                   |           |           |           |
| 1 | -6.320880 | 1.301028  | -0.274942 | 6                       | 1.462498  | 0.529093  | -0.065900 |
| 1 | -6.560897 | 1.622862  | 1.452384  | 6                       | 0.593744  | 1.568910  | 0.293041  |
| 1 | -7.460287 | 2.573921  | 0.257222  | 6                       | -0.761654 | 1.310701  | 0.534344  |
| 6 | 7.800906  | -1.864568 | 0.674554  | 6                       | -1.286508 | 0.017572  | 0.432058  |
| 6 | 8.324251  | -2.795069 | -0.432990 | 6                       | -0.407510 | -1.020054 | 0.082374  |
| 6 | 8.036687  | -2.477740 | 2.065484  | 6                       | 0.945239  | -0.786232 | -0.166039 |
| 1 | 8.383878  | -0.928180 | 0.622702  | 1                       | 0.964316  | 2.590362  | 0.380785  |
| 1 | 8.192765  | -2.342195 | -1.428494 | 1                       | -1.419608 | 2.140916  | 0.805741  |
| 1 | 9.396178  | -3.011497 | -0.292085 | 1                       | -0.763769 | -2.049392 | -0.008679 |
| 1 | 7.787786  | -3.758645 | -0.429404 | 8                       | 1.739525  | -1.833406 | -0.550905 |
| 1 | 7.698217  | -1.797514 | 2.863012  | 8                       | 2.784255  | 0.680803  | -0.341510 |
| 1 | 7.487887  | -3.427509 | 2.179669  | 6                       | 2.740411  | -2.242775 | 0.376567  |

1 2.288380 -2.545660 1.338712  
 1 3.249360 -3.110613 -0.066238  
 1 3.477591 -1.444848 0.559580  
 6 3.360966 1.970716 -0.261194  
 1 3.283767 2.391221 0.757299  
 1 4.421509 1.855089 -0.520656  
 1 2.891211 2.672423 -0.973053  
 6 -2.761971 -0.246152 0.646579  
 1 -2.900841 -1.303470 0.962808  
 1 -3.131534 0.353446 1.500667  
 6 -3.607821 0.038329 -0.557748  
 1 -3.145322 -0.068436 -1.545157  
 6 -5.093140 0.098097 -0.450148  
 1 -5.559215 0.516145 -1.356408  
 1 -5.537008 -0.909944 -0.296273  
 1 -5.414601 0.704360 0.416590

-----  
**Structure S20. <sup>2</sup>TS4**  
 -----

6 -3.103185 -0.290854 -0.319292  
 6 -3.264097 0.851523 -1.120692  
 6 -2.652730 2.050387 -0.769045  
 6 -1.891672 2.155279 0.416312  
 6 -1.753152 1.022815 1.232138  
 6 -2.354717 -0.190453 0.901887  
 1 -3.843760 0.795781 -2.041001  
 1 -2.761376 2.919152 -1.421961  
 1 -1.180360 1.064785 2.160329  
 8 -2.118138 -1.231905 1.721474  
 8 -3.561351 -1.508353 -0.633884  
 6 -3.094531 -2.249966 1.979523  
 1 -3.051390 -3.042467 1.220917  
 1 -2.842502 -2.661060 2.965989  
 1 -4.109215 -1.825380 2.005949  
 6 -4.290402 -1.715666 -1.841165  
 1 -3.674803 -1.465608 -2.720446  
 1 -4.544342 -2.781921 -1.861982  
 1 -5.215146 -1.116555 -1.851746  
 6 -1.105430 3.419418 0.708826  
 1 -1.660853 4.322610 0.422778  
 1 -0.822828 3.481867 1.768837  
 6 0.069895 3.180749 -0.184475  
 6 1.196852 2.460672 0.195574  
 1 -0.036688 3.463957 -1.236727

1 2.058926 2.429818 -0.475208  
 1 1.403644 2.300184 1.258283  
 8 2.800876 -0.455990 -0.934267  
 14 4.456370 -0.395722 -0.608561  
 1 5.120146 -0.314441 -1.940168  
 14 1.292142 -0.610992 -0.289762  
 1 0.885923 0.915050 -0.011514  
 6 4.817501 1.141098 0.404854  
 1 5.892178 1.202741 0.643625  
 1 4.538256 2.057752 -0.139161  
 1 4.259136 1.117413 1.355682  
 6 4.961389 -1.961295 0.289369  
 1 4.680559 -2.855959 -0.289510  
 1 6.052963 -1.981639 0.444202  
 1 4.475472 -2.021906 1.276954  
 6 1.285140 -1.467883 1.367116  
 1 1.652572 -2.500758 1.242850  
 1 1.943035 -0.949566 2.081915  
 1 0.263273 -1.506098 1.774683  
 6 0.094974 -1.265158 -1.562790  
 1 -0.852192 -1.559253 -1.087820  
 1 -0.114230 -0.515603 -2.340883  
 1 0.538330 -2.152908 -2.043770

-----  
**Structure S21. <sup>4</sup>TS5**  
 -----

27 -1.104275 0.692549 -0.323958  
 8 -2.450012 -0.666035 -0.571612  
 8 0.158775 -0.332849 -1.342209  
 7 -2.544049 2.077433 -0.876184  
 7 0.073741 2.350838 -0.782755  
 6 -3.703210 -0.609514 -0.237403  
 6 -4.384470 -1.793430 0.220138  
 6 -5.745337 -1.695018 0.486886  
 1 -6.276310 -2.583083 0.830230  
 6 -6.501600 -0.503220 0.345132  
 6 -5.830282 0.635900 -0.060702  
 1 -6.374191 1.580110 -0.167774  
 6 -4.439201 0.617704 -0.333076  
 6 -3.813909 1.851266 -0.739168  
 1 -4.521153 2.666827 -0.944161  
 6 1.325817 2.282746 -1.098047  
 1 1.904329 3.210452 -1.211437  
 6 2.080535 1.077492 -1.348420

|   |           |           |           |   |           |           |           |
|---|-----------|-----------|-----------|---|-----------|-----------|-----------|
| 6 | 3.475470  | 1.195154  | -1.539733 | 1 | -3.361089 | 4.647730  | -0.252114 |
| 1 | 3.937565  | 2.182731  | -1.442600 | 1 | -2.545638 | 5.458484  | -1.613057 |
| 6 | 4.259815  | 0.095506  | -1.846971 | 1 | -3.896731 | 4.375607  | -1.928336 |
| 6 | 3.612715  | -1.158730 | -1.970304 | 6 | -1.773519 | 3.089910  | -2.933326 |
| 1 | 4.236007  | -2.017901 | -2.215099 | 1 | -2.714391 | 2.783638  | -3.414052 |
| 6 | 2.246549  | -1.352566 | -1.796411 | 1 | -1.409538 | 3.993909  | -3.441635 |
| 6 | 1.443319  | -0.200520 | -1.481981 | 1 | -1.041082 | 2.281847  | -3.071169 |
| 6 | -3.590761 | -3.096980 | 0.430711  | 6 | 5.750885  | 0.244383  | -2.113325 |
| 6 | -2.480111 | -2.850572 | 1.482601  | 6 | 6.034279  | 0.240853  | -3.626763 |
| 1 | -2.928410 | -2.628190 | 2.465063  | 6 | 6.604865  | -0.810193 | -1.395042 |
| 1 | -1.831452 | -2.009606 | 1.207412  | 1 | 6.047688  | 1.232811  | -1.720834 |
| 1 | -1.855759 | -3.752935 | 1.592416  | 1 | 5.470753  | 1.035373  | -4.140733 |
| 6 | -2.967009 | -3.565577 | -0.905474 | 1 | 7.107693  | 0.392855  | -3.827952 |
| 1 | -2.274184 | -2.817086 | -1.305704 | 1 | 5.739660  | -0.723488 | -4.074054 |
| 1 | -3.754363 | -3.754530 | -1.653875 | 1 | 6.394942  | -0.835437 | -0.317491 |
| 1 | -2.411378 | -4.505869 | -0.753113 | 1 | 6.424538  | -1.820009 | -1.798884 |
| 6 | -4.484869 | -4.237408 | 0.951738  | 1 | 7.676840  | -0.594412 | -1.531559 |
| 1 | -5.284140 | -4.495052 | 0.238431  | 6 | -7.993726 | -0.489803 | 0.643625  |
| 1 | -4.952394 | -3.989432 | 1.917856  | 6 | -8.286583 | -0.825170 | 2.116053  |
| 1 | -3.873230 | -5.140719 | 1.103524  | 6 | -8.773152 | -1.421222 | -0.300345 |
| 6 | 1.585445  | -2.739823 | -1.929718 | 1 | -8.349015 | 0.539503  | 0.461516  |
| 6 | 2.623777  | -3.842802 | -2.207308 | 1 | -7.757849 | -0.136966 | 2.794273  |
| 1 | 3.367170  | -3.922139 | -1.397840 | 1 | -9.366336 | -0.754764 | 2.327030  |
| 1 | 3.162714  | -3.678627 | -3.153752 | 1 | -7.966544 | -1.851278 | 2.362340  |
| 1 | 2.113402  | -4.815604 | -2.282475 | 1 | -8.595145 | -1.159249 | -1.355301 |
| 6 | 0.841319  | -3.115311 | -0.624655 | 1 | -8.472042 | -2.472769 | -0.160042 |
| 1 | 0.070214  | -2.379663 | -0.371077 | 1 | -9.856775 | -1.357583 | -0.107884 |
| 1 | 1.542473  | -3.193234 | 0.220651  | 9 | -0.798543 | 0.393087  | 1.453744  |
| 1 | 0.352549  | -4.096100 | -0.742031 | 6 | 4.733242  | -1.042465 | 1.991550  |
| 6 | 0.583075  | -2.725070 | -3.108871 | 6 | 3.427049  | -1.302049 | 1.557570  |
| 1 | 1.098110  | -2.485461 | -4.053656 | 6 | 2.399420  | -0.383892 | 1.787350  |
| 1 | -0.210115 | -1.985156 | -2.944195 | 6 | 2.649827  | 0.819440  | 2.459656  |
| 1 | 0.114333  | -3.717076 | -3.219244 | 6 | 3.962538  | 1.084739  | 2.873489  |
| 6 | -0.665398 | 3.628491  | -0.668809 | 6 | 5.003850  | 0.180905  | 2.646782  |
| 6 | -2.029562 | 3.353829  | -1.434591 | 1 | 3.204454  | -2.221983 | 1.021920  |
| 6 | 0.095890  | 4.825507  | -1.253495 | 1 | 1.387720  | -0.592877 | 1.433070  |
| 1 | -0.524873 | 5.729688  | -1.211940 | 1 | 4.210952  | 2.013658  | 3.393276  |
| 1 | 0.997678  | 5.036383  | -0.660106 | 8 | 6.251396  | 0.493408  | 3.120423  |
| 1 | 0.402143  | 4.664727  | -2.296518 | 8 | 5.782212  | -1.897369 | 1.826586  |
| 6 | -0.922777 | 3.884850  | 0.828463  | 6 | 7.295322  | 0.632032  | 2.162437  |
| 1 | 0.036323  | 3.979460  | 1.355724  | 1 | 6.988302  | 1.291772  | 1.330504  |
| 1 | -1.484247 | 4.817253  | 0.977402  | 1 | 8.146930  | 1.091175  | 2.684701  |
| 1 | -1.477400 | 3.056572  | 1.287696  | 1 | 7.603296  | -0.340574 | 1.748730  |
| 6 | -3.015246 | 4.521421  | -1.287531 | 6 | 5.549075  | -3.153781 | 1.217821  |

1 5.185658 -3.044028 0.181595  
1 6.514201 -3.676686 1.202072  
1 4.820232 -3.753851 1.790500  
6 1.521349 1.789071 2.722374  
1 1.921287 2.769148 3.050636  
1 0.999386 1.986115 1.767893  
6 0.500863 1.299231 3.697201  
1 0.557927 0.260951 4.036932  
6 -0.694335 2.107808 4.053403  
1 -1.037872 1.910934 5.083158  
1 -0.509809 3.190123 3.945754  
1 -1.535927 1.853102 3.378569

-----  
**Structure S22. 4**  
-----

6 1.733607 0.517400 -0.028150  
6 0.812073 1.485552 0.394767  
6 -0.519858 1.137427 0.648391  
6 -0.969233 -0.179212 0.492441  
6 -0.038010 -1.145398 0.077625  
6 1.293535 -0.820538 -0.181371  
1 1.123378 2.522392 0.522502  
1 -1.223643 1.911358 0.960973  
1 -0.333506 -2.189101 -0.057427  
8 2.140399 -1.799722 -0.627957  
8 3.037530 0.761077 -0.319166  
6 3.182459 -2.189296 0.262037  
1 2.768939 -2.559545 1.217906  
1 3.731391 -3.005744 -0.228210  
1 3.875938 -1.358132 0.466612  
6 3.538777 2.078286 -0.186772  
1 3.457971 2.444407 0.852162  
1 4.598611 2.038626 -0.470571  
1 3.013590 2.783310 -0.855153  
6 -2.418300 -0.540989 0.720974  
1 -2.522774 -1.629551 0.853359  
1 -2.792787 -0.066725 1.644344  
6 -4.789923 -0.517286 -0.217080  
1 -5.411791 -0.129702 -1.037902  
1 -4.887436 -1.613438 -0.192886  
1 -5.169895 -0.110560 0.733556  
6 -3.341671 -0.117032 -0.421736  
1 -2.959210 -0.522879 -1.375529  
9 -3.288104 1.282329 -0.535945

-----  
**Structure S23. <sup>1</sup>INT2**  
-----

6 -0.201580 1.168555 0.036240  
6 1.196255 1.198618 0.006640  
6 1.923314 0.000028 -0.009787  
6 1.196253 -1.198586 0.006664  
6 -0.201559 -1.168541 0.036245  
1 1.714860 2.160290 -0.006428  
1 1.714865 -2.160258 -0.006371  
6 3.427103 -0.000035 -0.079542  
1 3.853731 -0.894084 0.398749  
1 3.757335 -0.001036 -1.132665  
1 3.853775 0.894849 0.397140  
6 -1.032347 -2.424553 0.073211  
1 -2.065744 -2.201251 -0.224878  
1 -0.615790 -3.201871 -0.584457  
1 -1.056586 -2.836931 1.096466  
6 -1.032339 2.424585 0.073216  
1 -2.065747 2.201301 -0.224849  
1 -1.056543 2.836953 1.096477  
1 -0.615766 3.201892 -0.584452  
7 -0.866098 0.000016 0.049993  
1 -2.418066 -0.000014 -0.038149  
9 -3.398693 -0.000042 -0.154873

-----  
**Structure S24. <sup>2</sup>TS6**  
-----

6 1.998449 -1.157677 0.166588  
6 3.326301 -1.420610 0.479679  
6 4.337404 -0.504076 0.136082  
6 3.960225 0.672009 -0.522584  
6 2.618366 0.913795 -0.820960  
1 3.576679 -2.349408 0.995408  
1 4.707979 1.414303 -0.807727  
6 5.771903 -0.793828 0.477159  
1 6.446543 -0.002892 0.122319  
1 5.892875 -0.893171 1.568184  
1 6.087636 -1.751140 0.032003  
6 2.136930 2.160209 -1.504361  
1 1.056766 2.099536 -1.686887  
1 2.342974 3.038284 -0.871332  
1 2.671133 2.307475 -2.455453  
6 0.863272 -2.079240 0.489380

1 0.080938 -1.548819 1.055972  
1 0.385922 -2.438979 -0.435431  
1 1.210856 -2.943172 1.069660  
7 1.694594 -0.002290 -0.471119  
1 0.632485 0.239242 -0.710664  
9 -0.625473 0.695526 -0.988006  
8 -2.413395 -0.320528 0.711655  
14 -1.461379 1.054619 1.034680  
14 -2.932690 -1.119213 -0.655425  
1 -1.851973 -2.009274 -1.186892  
6 -2.352033 2.599774 0.380270  
1 -1.870583 3.516769 0.761269  
1 -2.346972 2.634522 -0.718188  
1 -3.400699 2.602586 0.730066  
6 -1.669897 1.159770 2.950998  
1 -1.252993 0.270607 3.453133  
1 -1.155838 2.049337 3.353922  
1 -2.742286 1.229087 3.217871  
6 -3.487056 0.053138 -2.015519  
1 -4.278874 0.731248 -1.656253  
1 -2.619663 0.655028 -2.322593  
1 -3.875054 -0.501968 -2.886183  
6 -4.359129 -2.227888 -0.118959  
1 -4.721003 -2.838787 -0.963530  
1 -4.048852 -2.911918 0.688375  
1 -5.205185 -1.625921 0.253392

-----  
**Structure S25. R<sub>3</sub>Si-F**  
-----

9 -1.901887 -0.642321 1.465076  
8 0.184069 -0.439691 -0.148340  
14 -1.416527 -0.060805 0.005518  
14 1.732445 -0.008704 0.336464  
1 1.725803 0.155745 1.823318  
6 -1.681329 1.783323 0.046128  
1 -2.749680 2.026729 0.163870  
1 -1.131556 2.238644 0.886060  
1 -1.324845 2.247701 -0.887695  
6 -2.384587 -0.960688 -1.302150  
1 -2.192761 -2.044471 -1.250218  
1 -3.466310 -0.792542 -1.176412  
1 -2.096904 -0.609276 -2.306345  
6 2.204210 1.616086 -0.475776  
1 2.182345 1.520294 -1.574072

1 1.508560 2.420772 -0.187383  
1 3.221600 1.920703 -0.178519  
6 2.887798 -1.397856 -0.155220  
1 3.920197 -1.175628 0.162098  
1 2.581841 -2.348765 0.310106  
1 2.886727 -1.533552 -1.249409

-----  
**Structure S26. Me<sub>3</sub>NHPy**  
-----

6 -0.615793 1.240369 -0.001524  
6 0.753610 1.193010 -0.010785  
6 1.475130 -0.045362 -0.022562  
6 0.689286 -1.235150 -0.009002  
6 -0.684348 -1.209588 -0.000627  
1 1.300536 2.140162 -0.012585  
1 1.182849 -2.211354 -0.008506  
6 2.977147 -0.071593 0.016851  
1 3.381952 0.187935 1.016236  
1 3.370751 -1.068772 -0.238213  
1 3.420223 0.651901 -0.691303  
6 -1.577025 -2.409970 0.006347  
1 -2.231952 -2.431416 -0.885017  
1 -0.989663 -3.338303 0.023473  
1 -2.245658 -2.410083 0.888069  
6 -1.440372 2.489573 0.007306  
1 -2.094740 2.544329 -0.882450  
1 -2.104953 2.524615 0.890830  
1 -0.802858 3.384040 0.022347  
7 -1.331016 0.036337 -0.020975  
1 -2.335186 0.064852 0.107923

-----  
**Structure S27. <sup>2</sup>TS7**  
-----

6 -4.800240 -0.357653 -0.070748  
6 -4.041983 -1.342379 -0.722026  
6 -2.652458 -1.388720 -0.563424  
6 -1.979148 -0.467137 0.248466  
6 -2.743507 0.521525 0.886278  
6 -4.130644 0.589821 0.740062  
1 -4.530993 -2.085648 -1.352113  
1 -2.081744 -2.161350 -1.085836  
1 -2.269558 1.269248 1.527598  
8 -4.822745 1.550529 1.429804  
8 -6.152911 -0.242977 -0.145733

|   |           |           |           |   |           |           |           |
|---|-----------|-----------|-----------|---|-----------|-----------|-----------|
| 6 | -5.433059 | 2.572830  | 0.648145  | 7 | 1.395764  | 2.391103  | 0.170250  |
| 1 | -6.207824 | 2.166554  | -0.021594 | 6 | -2.485731 | -0.094168 | -0.786907 |
| 1 | -5.897438 | 3.278208  | 1.351885  | 6 | -3.323990 | -1.261428 | -0.984421 |
| 1 | -4.680549 | 3.112907  | 0.044839  | 6 | -4.692037 | -1.072433 | -1.136885 |
| 6 | -6.877959 | -1.156320 | -0.947015 | 1 | -5.327859 | -1.946748 | -1.277379 |
| 1 | -6.755135 | -2.195879 | -0.594607 | 6 | -5.330856 | 0.194711  | -1.132217 |
| 1 | -7.935688 | -0.873839 | -0.863277 | 6 | -4.527047 | 1.306329  | -0.967990 |
| 1 | -6.574367 | -1.101877 | -2.007751 | 1 | -4.975975 | 2.305754  | -0.963686 |
| 6 | -0.468118 | -0.526901 | 0.403652  | 6 | -3.124996 | 1.195244  | -0.785773 |
| 1 | -0.167344 | 0.216858  | 1.167647  | 6 | -2.381021 | 2.408486  | -0.589935 |
| 1 | -0.177712 | -1.511823 | 0.811234  | 1 | -2.962991 | 3.329710  | -0.719104 |
| 6 | 0.267222  | -0.289654 | -0.885233 | 6 | 2.682946  | 2.255824  | 0.030909  |
| 6 | 1.355124  | -1.073881 | -1.319882 | 1 | 3.331971  | 3.112719  | 0.244719  |
| 1 | 0.030921  | 0.642729  | -1.411950 | 6 | 3.379830  | 1.058319  | -0.356676 |
| 1 | 1.684852  | -0.964129 | -2.362086 | 6 | 4.794349  | 1.119857  | -0.437056 |
| 1 | 1.411404  | -2.109520 | -0.953402 | 1 | 5.286800  | 2.077284  | -0.233694 |
| 6 | 4.128258  | -0.739065 | 0.862960  | 6 | 5.556797  | 0.011330  | -0.753062 |
| 6 | 5.510881  | -0.668567 | 0.969414  | 6 | 4.864463  | -1.201785 | -1.000143 |
| 6 | 6.253525  | 0.234662  | 0.181826  | 1 | 5.467258  | -2.075310 | -1.249524 |
| 6 | 5.522887  | 1.058390  | -0.696794 | 6 | 3.482818  | -1.339325 | -0.945151 |
| 6 | 4.139804  | 0.960420  | -0.784247 | 6 | 2.686124  | -0.175270 | -0.612003 |
| 1 | 6.019678  | -1.310441 | 1.693512  | 6 | -2.694508 | -2.667355 | -1.049663 |
| 1 | 6.040653  | 1.801496  | -1.309140 | 6 | -1.947692 | -2.981040 | 0.265908  |
| 6 | 7.754215  | 0.298377  | 0.260472  | 1 | -2.653895 | -3.015342 | 1.110221  |
| 1 | 8.220016  | -0.420031 | -0.438646 | 1 | -1.189291 | -2.220998 | 0.481869  |
| 1 | 8.130934  | 1.298364  | -0.005312 | 1 | -1.449842 | -3.963132 | 0.199717  |
| 1 | 8.116830  | 0.046284  | 1.269431  | 6 | -1.710173 | -2.724024 | -2.238986 |
| 6 | 3.312201  | 1.804420  | -1.709479 | 1 | -0.924875 | -1.969470 | -2.127176 |
| 1 | 2.452138  | 2.240359  | -1.173984 | 1 | -2.240562 | -2.546291 | -3.189212 |
| 1 | 3.906113  | 2.610466  | -2.161525 | 1 | -1.231580 | -3.716056 | -2.296200 |
| 1 | 2.892393  | 1.187805  | -2.522778 | 6 | -3.746923 | -3.772143 | -1.259297 |
| 6 | 3.285901  | -1.670316 | 1.686610  | 1 | -4.297677 | -3.647754 | -2.205193 |
| 1 | 2.513167  | -1.111992 | 2.240471  | 1 | -4.479812 | -3.807800 | -0.437253 |
| 1 | 2.752406  | -2.384612 | 1.036686  | 1 | -3.244070 | -4.751726 | -1.296660 |
| 1 | 3.894445  | -2.239933 | 2.401917  | 6 | 2.792567  | -2.681302 | -1.256087 |
| 7 | 3.449758  | 0.064212  | -0.013410 | 6 | 3.801166  | -3.806418 | -1.553572 |
| 1 | 2.451930  | -0.469232 | -0.594151 | 1 | 4.468690  | -3.999717 | -0.698428 |

---

**Structure S28. <sup>1</sup>TS8**

---

|    |           |           |           |
|----|-----------|-----------|-----------|
| 27 | 0.104225  | 1.087599  | -0.205587 |
| 8  | -1.208680 | -0.221556 | -0.631378 |
| 8  | 1.398869  | -0.268123 | -0.525330 |
| 7  | -1.122360 | 2.505994  | -0.263072 |

|   |          |           |           |
|---|----------|-----------|-----------|
| 1 | 3.254634 | -4.739367 | -1.765139 |
| 6 | 1.931519 | -3.135348 | -0.053777 |
| 1 | 1.192676 | -2.372118 | 0.212830  |
| 1 | 2.568607 | -3.330875 | 0.825074  |
| 1 | 1.398489 | -4.069906 | -0.296529 |
| 6 | 1.905370 | -2.501342 | -2.508935 |



|   |           |           |           |   |           |           |           |
|---|-----------|-----------|-----------|---|-----------|-----------|-----------|
| 6 | -2.394862 | 1.037095  | 1.736285  | 1 | 2.559909  | 5.298199  | 0.730641  |
| 6 | -1.323957 | 1.462568  | 0.864757  | 1 | 1.759837  | 3.778815  | 1.234424  |
| 6 | 2.922182  | -3.343474 | 0.279867  | 6 | -5.363782 | 3.147951  | 0.432690  |
| 6 | 2.217627  | -3.399632 | -1.096288 | 6 | -5.586740 | 4.215576  | 1.519848  |
| 1 | 2.939999  | -3.640938 | -1.893115 | 6 | -6.485985 | 2.100545  | 0.461449  |
| 1 | 1.748770  | -2.436826 | -1.329207 | 1 | -5.409879 | 3.657526  | -0.546084 |
| 1 | 1.437249  | -4.179227 | -1.096723 | 1 | -4.820919 | 5.005542  | 1.466897  |
| 6 | 1.879705  | -3.088067 | 1.394615  | 1 | -6.578027 | 4.687921  | 1.416161  |
| 1 | 1.369142  | -2.129347 | 1.248236  | 1 | -5.531690 | 3.761988  | 2.524038  |
| 1 | 2.366494  | -3.077124 | 2.383707  | 1 | -6.320880 | 1.301028  | -0.274942 |
| 1 | 1.122550  | -3.890107 | 1.399143  | 1 | -6.560897 | 1.622862  | 1.452384  |
| 6 | 3.549161  | -4.726301 | 0.538769  | 1 | -7.460287 | 2.573921  | 0.257222  |
| 1 | 4.048915  | -4.776400 | 1.519230  | 6 | 7.800906  | -1.864568 | 0.674554  |
| 1 | 4.282683  | -5.001131 | -0.235762 | 6 | 8.324251  | -2.795069 | -0.432990 |
| 1 | 2.758316  | -5.493010 | 0.531213  | 6 | 8.036687  | -2.477740 | 2.065484  |
| 6 | -2.119216 | 0.035649  | 2.879433  | 1 | 8.383878  | -0.928180 | 0.622702  |
| 6 | -3.386864 | -0.263115 | 3.702275  | 1 | 8.192765  | -2.342195 | -1.428494 |
| 1 | -4.174356 | -0.729054 | 3.089088  | 1 | 9.396178  | -3.011497 | -0.292085 |
| 1 | -3.804819 | 0.643107  | 4.168248  | 1 | 7.787786  | -3.758645 | -0.429404 |
| 1 | -3.140010 | -0.967754 | 4.511813  | 1 | 7.698217  | -1.797514 | 2.863012  |
| 6 | -1.600190 | -1.311304 | 2.327103  | 1 | 7.487887  | -3.427509 | 2.179669  |
| 1 | -0.653497 | -1.178489 | 1.791744  | 1 | 9.106486  | -2.691135 | 2.225842  |
| 1 | -2.333519 | -1.760916 | 1.639579  | 1 | 0.797708  | 0.710414  | -1.595546 |
| 1 | -1.431932 | -2.019680 | 3.155377  | 6 | -5.254805 | -3.256132 | -1.234447 |
| 6 | -1.067652 | 0.640367  | 3.839868  | 6 | -4.148263 | -3.997104 | -1.665763 |
| 1 | -1.437817 | 1.581764  | 4.278215  | 6 | -2.873386 | -3.413828 | -1.694240 |
| 1 | -0.127550 | 0.845742  | 3.312100  | 6 | -2.668617 | -2.092503 | -1.289241 |
| 1 | -0.858821 | -0.059861 | 4.666152  | 6 | -3.782354 | -1.355203 | -0.847963 |
| 6 | 1.716028  | 3.697084  | -1.532727 | 6 | -5.057097 | -1.914273 | -0.820044 |
| 6 | 2.982709  | 3.578497  | -0.569138 | 1 | -4.267675 | -5.030798 | -1.990376 |
| 6 | 1.267197  | 5.153976  | -1.715130 | 1 | -2.025327 | -4.011698 | -2.039073 |
| 1 | 2.100680  | 5.771077  | -2.075238 | 1 | -3.671617 | -0.325611 | -0.500302 |
| 1 | 0.473224  | 5.224539  | -2.473114 | 8 | -6.121974 | -1.144876 | -0.428892 |
| 1 | 0.888036  | 5.594349  | -0.782471 | 8 | -6.530407 | -3.719097 | -1.181893 |
| 6 | 2.030829  | 3.095858  | -2.916597 | 6 | -6.685851 | -1.459501 | 0.840339  |
| 1 | 1.107065  | 3.045329  | -3.511844 | 1 | -5.939408 | -1.334298 | 1.644942  |
| 1 | 2.751746  | 3.720258  | -3.462646 | 1 | -7.509288 | -0.752252 | 1.007987  |
| 1 | 2.439758  | 2.080526  | -2.824655 | 1 | -7.077783 | -2.488800 | 0.863909  |
| 6 | 4.225125  | 4.249538  | -1.171971 | 6 | -6.793163 | -5.054611 | -1.569744 |
| 1 | 4.585162  | 3.723943  | -2.067672 | 1 | -6.248450 | -5.778575 | -0.937879 |
| 1 | 4.011075  | 5.291757  | -1.442955 | 1 | -7.872598 | -5.210020 | -1.442873 |
| 1 | 5.046980  | 4.278509  | -0.441612 | 1 | -6.526085 | -5.232417 | -2.626548 |
| 6 | 2.676727  | 4.207643  | 0.805210  | 6 | -1.294466 | -1.463194 | -1.320681 |
| 1 | 3.508963  | 3.999944  | 1.494369  | 1 | -1.076912 | -0.998531 | -0.340807 |

1 -0.520730 -2.233269 -1.458442  
6 -1.120768 -0.370731 -2.331134  
6 0.082236 -0.066482 -2.888008  
1 -1.968073 0.309260 -2.476079  
1 0.180302 0.760270 -3.595305  
1 0.908812 -0.782132 -2.852844

---

**Structure S30. 5**

6 -1.186658 -0.563648 -0.014054  
6 -0.217274 -1.520618 0.389319  
6 1.094198 -1.146183 0.549493  
6 1.514468 0.205079 0.317425  
6 0.508978 1.166023 -0.054912  
6 -0.804967 0.809641 -0.225477  
1 -0.508178 -2.555468 0.562161  
1 1.828317 -1.893308 0.854145  
1 0.785014 2.208053 -0.228438  
8 -1.710438 1.718785 -0.653267  
8 -2.450430 -0.840680 -0.233029  
6 -2.729758 2.120829 0.271936  
1 -2.278168 2.553954 1.180434  
1 -3.324052 2.888567 -0.239470  
1 -3.381546 1.278252 0.547806  
6 -2.970890 -2.170344 -0.073804  
1 -2.857492 -2.505901 0.967742  
1 -4.033545 -2.103405 -0.330304  
1 -2.463484 -2.866007 -0.758569  
6 2.818323 0.728422 1.037878  
1 2.735789 1.763167 1.377362  
1 3.216553 0.026659 1.775294  
6 2.994250 0.438948 -0.367785  
1 2.924714 1.287083 -1.055173  
6 3.762471 -0.739876 -0.900852  
1 3.312227 -1.127119 -1.826240  
1 4.781368 -0.393627 -1.140547  
1 3.850581 -1.555390 -0.170838

---

**Structure S31. BF<sub>4</sub><sup>-</sup>**

5 -0.000120 0.000083 0.000231  
9 -1.074255 0.824353 0.377388  
9 1.198710 0.530266 0.507853  
9 -0.196881 -1.292383 0.516657

9 0.072493 -0.062282 -1.402027

---

**Structure S32. <sup>1</sup>INT3**

6 -2.697415 -0.034433 -0.050831  
6 -2.583976 -1.404102 0.303055  
6 -1.342241 -1.960286 0.505817  
6 -0.152934 -1.179450 0.369347  
6 -0.285648 0.209301 0.029827  
6 -1.519598 0.774590 -0.185392  
1 -3.475662 -2.019721 0.409949  
1 -1.267087 -3.014527 0.775986  
1 0.608455 0.823582 -0.077318  
8 -1.624666 2.069944 -0.576695  
8 -3.841207 0.577539 -0.287779  
6 -2.115139 2.996142 0.397488  
1 -1.455933 3.015935 1.282252  
1 -2.108736 3.984556 -0.080098  
1 -3.142547 2.749334 0.708891  
6 -5.091278 -0.116212 -0.191649  
1 -5.252045 -0.488398 0.831804  
1 -5.861190 0.622024 -0.441982  
1 -5.129361 -0.950228 -0.908949  
6 1.155408 -1.638460 1.140176  
1 1.727166 -0.790851 1.521461  
1 0.965542 -2.456942 1.839705  
6 1.195206 -1.923029 -0.269886  
1 1.711400 -1.186706 -0.890768  
6 1.062480 -3.297911 -0.861332  
1 0.521996 -3.277272 -1.818774  
1 2.082660 -3.666374 -1.061131  
1 0.576470 -4.012786 -0.183314  
5 3.372538 0.856356 -0.052047  
9 2.557381 0.826675 -1.211158  
9 4.376642 1.808371 -0.200388  
9 2.551307 1.188855 1.054116  
9 3.916222 -0.418366 0.151718

---

**Structure S33. <sup>1</sup>TS12**

6 -3.003311 -0.254023 -0.003170  
6 -2.551448 -1.506293 0.451225  
6 -1.206283 -1.702973 0.756260  
6 -0.287644 -0.646625 0.644623

|   |           |           |           |
|---|-----------|-----------|-----------|
| 6 | -0.739376 | 0.608684  | 0.181202  |
| 6 | -2.074331 | 0.819540  | -0.133768 |
| 1 | -3.248202 | -2.336614 | 0.559625  |
| 1 | -0.872371 | -2.685256 | 1.097588  |
| 1 | -0.040782 | 1.439652  | 0.060287  |
| 8 | -2.461921 | 2.029601  | -0.620304 |
| 8 | -4.269419 | 0.018551  | -0.352485 |
| 6 | -3.316427 | 2.818166  | 0.210334  |
| 1 | -2.831245 | 3.031977  | 1.178892  |
| 1 | -3.485656 | 3.763393  | -0.322676 |
| 1 | -4.282843 | 2.321213  | 0.386840  |
| 6 | -5.263910 | -0.995286 | -0.269955 |
| 1 | -5.385233 | -1.354172 | 0.765734  |
| 1 | -6.200266 | -0.533184 | -0.605654 |
| 1 | -5.021459 | -1.846995 | -0.927176 |
| 6 | 1.195938  | -0.837143 | 0.979498  |
| 1 | 1.655127  | 0.086245  | 1.346791  |
| 1 | 1.367354  | -1.675060 | 1.665593  |
| 6 | 1.524092  | -1.135754 | -0.409619 |
| 1 | 1.550216  | -0.284315 | -1.091660 |
| 6 | 1.550242  | -2.485073 | -0.999934 |
| 1 | 0.750600  | -2.583430 | -1.752584 |
| 1 | 2.499340  | -2.568318 | -1.555359 |
| 1 | 1.478650  | -3.287915 | -0.255616 |
| 5 | 3.947098  | 0.622698  | -0.020837 |
| 9 | 2.911173  | 1.396515  | -0.567763 |
| 9 | 5.168428  | 0.954795  | -0.573068 |
| 9 | 3.947950  | 0.740683  | 1.365919  |
| 9 | 3.663198  | -0.768131 | -0.347789 |

-----  
**Structure S34. <sup>1</sup>INT4**  
 -----

|   |           |           |           |
|---|-----------|-----------|-----------|
| 6 | -3.093260 | -0.277251 | 0.024107  |
| 6 | -2.594009 | -1.484600 | 0.529501  |
| 6 | -1.224734 | -1.636042 | 0.786061  |
| 6 | -0.325037 | -0.592054 | 0.553286  |
| 6 | -0.833560 | 0.621735  | 0.058248  |
| 6 | -2.190316 | 0.793007  | -0.207335 |
| 1 | -3.265441 | -2.321558 | 0.720576  |
| 1 | -0.860837 | -2.590501 | 1.175188  |
| 1 | -0.170782 | 1.469517  | -0.134135 |
| 8 | -2.618637 | 1.980307  | -0.733388 |
| 8 | -4.393841 | -0.042268 | -0.279175 |
| 6 | -3.442001 | 2.787365  | 0.105258  |

|   |           |           |           |
|---|-----------|-----------|-----------|
| 1 | -2.915727 | 3.048540  | 1.041209  |
| 1 | -3.655837 | 3.709651  | -0.452783 |
| 1 | -4.390214 | 2.283871  | 0.351416  |
| 6 | -5.349144 | -1.065894 | -0.065204 |
| 1 | -5.403086 | -1.357517 | 0.998550  |
| 1 | -6.319339 | -0.655565 | -0.373998 |
| 1 | -5.127572 | -1.961891 | -0.671260 |
| 6 | 1.161323  | -0.753003 | 0.779423  |
| 1 | 1.576628  | 0.163832  | 1.223113  |
| 1 | 1.366371  | -1.578926 | 1.478537  |
| 6 | 1.904610  | -1.017841 | -0.525710 |
| 1 | 1.715635  | -0.209255 | -1.246167 |
| 6 | 1.691333  | -2.376774 | -1.143194 |
| 1 | 0.631503  | -2.489038 | -1.415547 |
| 1 | 2.300537  | -2.490335 | -2.051348 |
| 1 | 1.954362  | -3.171657 | -0.428550 |
| 5 | 4.153854  | 0.851519  | 0.121389  |
| 9 | 3.272293  | 1.573830  | -0.570267 |
| 9 | 5.325307  | 0.564609  | -0.432961 |
| 9 | 4.041576  | 0.822726  | 1.446542  |
| 9 | 3.323395  | -0.917052 | -0.230856 |

-----  
**Structure S35. BF<sub>3</sub>**  
 -----

|   |           |           |           |
|---|-----------|-----------|-----------|
| 5 | 0.000000  | 0.000433  | 0.000091  |
| 9 | -1.139194 | 0.656956  | -0.000017 |
| 9 | 1.138892  | 0.657479  | -0.000017 |
| 9 | 0.000302  | -1.314676 | -0.000017 |

-----  
**Structure S36. <sup>3</sup>TS10**  
 -----

|    |           |           |           |
|----|-----------|-----------|-----------|
| 27 | -0.861762 | 0.834171  | -0.267587 |
| 8  | -2.172895 | -0.514303 | -0.112391 |
| 8  | 0.386391  | -0.551439 | -0.604698 |
| 7  | -2.137176 | 2.163591  | -0.757287 |
| 7  | 0.424571  | 2.202280  | -0.499196 |
| 6  | -3.461333 | -0.428713 | -0.117237 |
| 6  | -4.264274 | -1.599458 | 0.170900  |
| 6  | -5.644439 | -1.456346 | 0.176988  |
| 1  | -6.257510 | -2.329098 | 0.401237  |
| 6  | -6.329844 | -0.240369 | -0.090666 |
| 6  | -5.562425 | 0.868119  | -0.380427 |
| 1  | -6.046460 | 1.825226  | -0.601146 |
| 6  | -4.142705 | 0.806606  | -0.398700 |

|   |           |           |           |   |           |           |           |
|---|-----------|-----------|-----------|---|-----------|-----------|-----------|
| 6 | -3.429027 | 2.000280  | -0.738701 | 6 | -0.425473 | 4.006052  | 0.937904  |
| 1 | -4.064822 | 2.846673  | -1.026509 | 1 | 0.514350  | 3.960315  | 1.505671  |
| 6 | 1.684955  | 2.005522  | -0.748463 | 1 | -0.796704 | 5.039096  | 0.980818  |
| 1 | 2.329862  | 2.881766  | -0.875086 | 1 | -1.155350 | 3.345199  | 1.418835  |
| 6 | 2.351197  | 0.750673  | -0.951829 | 6 | -2.428662 | 4.634548  | -1.159905 |
| 6 | 3.717665  | 0.790794  | -1.325100 | 1 | -2.828112 | 4.735589  | -0.141380 |
| 1 | 4.214184  | 1.765002  | -1.378027 | 1 | -1.872382 | 5.548888  | -1.405582 |
| 6 | 4.413785  | -0.355139 | -1.656886 | 1 | -3.275991 | 4.586593  | -1.858837 |
| 6 | 3.706730  | -1.583272 | -1.597905 | 6 | -1.256519 | 3.138072  | -2.801451 |
| 1 | 4.257466  | -2.485116 | -1.865774 | 1 | -2.198772 | 2.852858  | -3.292328 |
| 6 | 2.364768  | -1.698765 | -1.252862 | 1 | -0.868311 | 4.034805  | -3.304512 |
| 6 | 1.645721  | -0.493771 | -0.910120 | 1 | -0.539328 | 2.314686  | -2.931609 |
| 6 | -3.587033 | -2.953035 | 0.463895  | 6 | 5.854679  | -0.299127 | -2.146258 |
| 6 | -2.686571 | -2.834229 | 1.715961  | 6 | 5.956263  | -0.704105 | -3.627572 |
| 1 | -3.278834 | -2.533390 | 2.595723  | 6 | 6.811764  | -1.132666 | -1.280933 |
| 1 | -1.893361 | -2.094880 | 1.560301  | 1 | 6.177068  | 0.754712  | -2.071256 |
| 1 | -2.215430 | -3.806189 | 1.937688  | 1 | 5.304195  | -0.078652 | -4.257645 |
| 6 | -2.733032 | -3.380469 | -0.751525 | 1 | 6.991110  | -0.602829 | -3.994775 |
| 1 | -1.947427 | -2.645686 | -0.955960 | 1 | 5.652624  | -1.754666 | -3.770644 |
| 1 | -3.362793 | -3.488811 | -1.650059 | 1 | 6.776317  | -0.807180 | -0.232626 |
| 1 | -2.251118 | -4.352616 | -0.555451 | 1 | 6.547758  | -2.202691 | -1.311028 |
| 6 | -4.615557 | -4.067394 | 0.732983  | 1 | 7.848673  | -1.038426 | -1.643396 |
| 1 | -5.279964 | -4.234548 | -0.129706 | 6 | -7.849848 | -0.181552 | -0.057253 |
| 1 | -5.241669 | -3.851132 | 1.613305  | 6 | -8.403723 | -0.500154 | 1.342103  |
| 1 | -4.085411 | -5.012562 | 0.929447  | 6 | -8.483270 | -1.093627 | -1.121749 |
| 6 | 1.623802  | -3.049998 | -1.308809 | 1 | -8.136796 | 0.857086  | -0.298167 |
| 6 | 2.573914  | -4.217695 | -1.633739 | 1 | -7.981368 | 0.177262  | 2.101092  |
| 1 | 3.368083  | -4.322072 | -0.876629 | 1 | -9.501423 | -0.399289 | 1.363209  |
| 1 | 3.052217  | -4.106196 | -2.619564 | 1 | -8.159580 | -1.533152 | 1.641330  |
| 1 | 2.003792  | -5.160037 | -1.649983 | 1 | -8.117592 | -0.842317 | -2.129914 |
| 6 | 0.938188  | -3.372681 | 0.039370  | 1 | -8.243669 | -2.153289 | -0.932383 |
| 1 | 0.233912  | -2.584077 | 0.324915  | 1 | -9.581498 | -0.996491 | -1.119736 |
| 1 | 1.687829  | -3.485011 | 0.837718  | 6 | 4.332085  | -0.501663 | 2.125493  |
| 1 | 0.385175  | -4.323015 | -0.039639 | 6 | 3.196214  | -1.318680 | 2.156965  |
| 6 | 0.560306  | -2.976094 | -2.431016 | 6 | 1.928797  | -0.786721 | 2.401867  |
| 1 | 1.042542  | -2.806795 | -3.407750 | 6 | 1.751663  | 0.583876  | 2.610048  |
| 1 | -0.148192 | -2.159906 | -2.242725 | 6 | 2.887099  | 1.403674  | 2.538838  |
| 1 | -0.006117 | -3.920398 | -2.487635 | 6 | 4.167457  | 0.892911  | 2.304454  |
| 6 | -0.164441 | 3.574574  | -0.513786 | 1 | 3.295775  | -2.390724 | 1.997163  |
| 6 | -1.521008 | 3.404258  | -1.305560 | 1 | 1.073953  | -1.463203 | 2.420591  |
| 6 | 0.750108  | 4.617398  | -1.173070 | 1 | 2.803689  | 2.484950  | 2.675601  |
| 1 | 0.212437  | 5.568422  | -1.284416 | 8 | 5.202867  | 1.785074  | 2.329526  |
| 1 | 1.626848  | 4.823384  | -0.541962 | 8 | 5.600959  | -0.971946 | 1.954607  |
| 1 | 1.105174  | 4.307056  | -2.164914 | 6 | 6.239019  | 1.704075  | 1.356433  |

|   |           |           |          |   |           |           |           |
|---|-----------|-----------|----------|---|-----------|-----------|-----------|
| 1 | 5.843972  | 1.404418  | 0.373851 | 6 | 3.542637  | -2.997060 | -0.366396 |
| 1 | 6.674177  | 2.711508  | 1.277652 | 6 | 2.572227  | -2.892534 | -1.566574 |
| 1 | 7.021553  | 0.989349  | 1.651342 | 1 | 3.116402  | -2.613387 | -2.483711 |
| 6 | 5.794601  | -2.366700 | 1.817899 | 1 | 1.796772  | -2.142111 | -1.377064 |
| 1 | 5.274897  | -2.765081 | 0.929479 | 1 | 2.079565  | -3.862855 | -1.743165 |
| 1 | 6.874460  | -2.521365 | 1.695817 | 6 | 2.761330  | -3.403693 | 0.902639  |
| 1 | 5.449121  | -2.913333 | 2.713277 | 1 | 1.995077  | -2.660045 | 1.142596  |
| 6 | 0.401426  | 1.166475  | 2.965753 | 1 | 3.443579  | -3.503555 | 1.763125  |
| 1 | 0.237979  | 0.992608  | 4.055481 | 1 | 2.262270  | -4.375001 | 0.749641  |
| 1 | 0.436971  | 2.263246  | 2.874983 | 6 | 4.552131  | -4.117666 | -0.678088 |
| 6 | -0.796839 | 0.619360  | 2.240174 | 1 | 5.261894  | -4.277845 | 0.149085  |
| 1 | -0.752832 | -0.445303 | 1.998387 | 1 | 5.130231  | -3.913452 | -1.593446 |
| 6 | -2.136274 | 1.094452  | 2.723359 | 1 | 4.009246  | -5.063189 | -0.834247 |
| 1 | -2.346477 | 0.707340  | 3.743353 | 6 | -1.597509 | -3.013012 | 1.350061  |
| 1 | -2.186945 | 2.194087  | 2.797815 | 6 | -2.533730 | -4.172286 | 1.739533  |
| 1 | -2.958157 | 0.758825  | 2.077372 | 1 | -3.329973 | -4.324401 | 0.992792  |

-----  
**Structure S37. Co<sup>III</sup>(salen)-alkyl**  
 -----

|    |           |           |           |   |           |           |           |
|----|-----------|-----------|-----------|---|-----------|-----------|-----------|
| 27 | 0.853036  | 0.847040  | 0.207603  | 1 | -1.952826 | -5.106097 | 1.801198  |
| 8  | 2.161461  | -0.536634 | 0.252385  | 6 | -0.917982 | -3.395028 | 0.015745  |
| 8  | -0.403788 | -0.535239 | 0.487255  | 1 | -0.205236 | -2.625711 | -0.296573 |
| 7  | 2.154827  | 2.194048  | 0.565121  | 1 | -1.669490 | -3.526907 | -0.778202 |
| 7  | -0.418552 | 2.235176  | 0.491297  | 1 | -0.375821 | -4.348062 | 0.129992  |
| 6  | 3.447711  | -0.455672 | 0.140711  | 6 | -0.527588 | -2.873679 | 2.459682  |
| 6  | 4.234009  | -1.638529 | -0.138934 | 1 | -1.004956 | -2.657545 | 3.429498  |
| 6  | 5.614443  | -1.502494 | -0.212280 | 1 | 0.173554  | -2.063304 | 2.223849  |
| 1  | 6.214173  | -2.387167 | -0.425608 | 1 | 0.047646  | -3.808627 | 2.561141  |
| 6  | 6.313735  | -0.280628 | -0.030164 | 6 | 0.155885  | 3.614427  | 0.549470  |
| 6  | 5.560081  | 0.846778  | 0.227942  | 6 | 1.577806  | 3.419257  | 1.198889  |
| 1  | 6.054393  | 1.812991  | 0.373834  | 6 | -0.708743 | 4.578942  | 1.380221  |
| 6  | 4.144258  | 0.791539  | 0.301433  | 1 | -0.156869 | 5.509927  | 1.567926  |
| 6  | 3.440383  | 2.003536  | 0.603604  | 1 | -1.620689 | 4.859035  | 0.833438  |
| 1  | 4.079448  | 2.835813  | 0.923750  | 1 | -1.005698 | 4.154900  | 2.348647  |
| 6  | -1.680913 | 2.032058  | 0.732736  | 6 | 0.277071  | 4.193884  | -0.868954 |
| 1  | -2.327652 | 2.905654  | 0.872590  | 1 | -0.702725 | 4.162788  | -1.366046 |
| 6  | -2.346830 | 0.776638  | 0.920387  | 1 | 0.597478  | 5.243843  | -0.831842 |
| 6  | -3.715966 | 0.812218  | 1.288610  | 1 | 0.997787  | 3.630764  | -1.471540 |
| 1  | -4.217751 | 1.784350  | 1.331300  | 6 | 2.468615  | 4.657172  | 1.005961  |
| 6  | -4.408789 | -0.335270 | 1.618138  | 1 | 2.802726  | 4.763575  | -0.035036 |
| 6  | -3.688578 | -1.557335 | 1.590119  | 1 | 1.923583  | 5.567236  | 1.290761  |
| 1  | -4.230782 | -2.457129 | 1.880511  | 1 | 3.358147  | 4.612492  | 1.649969  |
| 6  | -2.349248 | -1.671311 | 1.241438  | 6 | 1.454431  | 3.111601  | 2.707157  |
| 6  | -1.643363 | -0.469378 | 0.852596  | 1 | 2.437311  | 2.814010  | 3.100859  |
|    |           |           |           | 1 | 1.116722  | 3.993016  | 3.269759  |
|    |           |           |           | 1 | 0.750219  | 2.284881  | 2.885232  |

6 -5.863923 -0.296464 2.063121  
 6 -6.007601 -0.665424 3.550182  
 6 -6.769564 -1.177083 1.187467  
 1 -6.207409 0.747142 1.949148  
 1 -5.395898 -0.005333 4.185369  
 1 -7.057274 -0.584215 3.878359  
 1 -5.680290 -1.702806 3.732142  
 1 -6.689746 -0.894514 0.128796  
 1 -6.493332 -2.241167 1.272815  
 1 -7.823666 -1.084732 1.497068  
 6 7.831612 -0.230769 -0.122368  
 6 8.333208 -0.619188 -1.523811  
 6 8.500620 -1.093648 0.961191  
 1 8.130483 0.816887 0.057322  
 1 7.885256 0.022569 -2.298939  
 1 9.429695 -0.524425 -1.589676  
 1 8.075443 -1.664344 -1.763354  
 1 8.172850 -0.792407 1.968739  
 1 8.250394 -2.159861 0.831816  
 1 9.598390 -1.002402 0.914705  
 6 -4.318339 -0.555038 -2.188518  
 6 -3.163485 -1.346939 -2.177618  
 6 -1.893691 -0.773695 -2.281004  
 6 -1.735077 0.610744 -2.373751  
 6 -2.895203 1.398994 -2.374983  
 6 -4.175842 0.849146 -2.291626  
 1 -3.248090 -2.428935 -2.089395  
 1 -1.021274 -1.426416 -2.257831  
 1 -2.828095 2.488076 -2.438467  
 8 -5.234538 1.712498 -2.373813  
 8 -5.586466 -1.052617 -2.123025  
 6 -6.290914 1.621328 -1.423809  
 1 -5.904355 1.399764 -0.416704  
 1 -6.786288 2.603466 -1.409569  
 1 -7.022355 0.846502 -1.697394  
 6 -5.764476 -2.451299 -2.006586  
 1 -5.287177 -2.848228 -1.093754  
 1 -6.846973 -2.623732 -1.945160  
 1 -5.362277 -2.986771 -2.884845  
 6 -0.383009 1.261161 -2.543347  
 1 -0.121012 1.169784 -3.618718  
 1 -0.481680 2.339013 -2.378771  
 6 0.822693 0.707703 -1.784641  
 1 0.811812 -0.389419 -1.825116

6 2.113954 1.215634 -2.407051  
 1 2.167200 0.898277 -3.465874  
 1 2.177412 2.314777 -2.400160  
 1 3.009060 0.825711 -1.912189

---

**Structure S38.** [Co<sup>IV</sup>(salen)-alkyl]<sup>+</sup>

---

27 0.844961 0.867528 0.226707  
 8 2.126403 -0.497447 0.222845  
 8 -0.391958 -0.472607 0.480878  
 7 2.124298 2.185425 0.601727  
 7 -0.424036 2.243528 0.456194  
 6 3.420024 -0.442007 0.137108  
 6 4.187686 -1.633790 -0.138622  
 6 5.567473 -1.501821 -0.196030  
 1 6.163301 -2.388331 -0.408184  
 6 6.276704 -0.284780 0.001861  
 6 5.538932 0.849253 0.264214  
 1 6.039055 1.808832 0.422885  
 6 4.120881 0.800287 0.322108  
 6 3.418625 2.001067 0.620079  
 1 4.048988 2.847584 0.911441  
 6 -1.695864 2.048300 0.668828  
 1 -2.336917 2.929529 0.768100  
 6 -2.361267 0.802348 0.876051  
 6 -3.728668 0.834516 1.242672  
 1 -4.242242 1.799472 1.268020  
 6 -4.398138 -0.320090 1.598286  
 6 -3.664137 -1.533622 1.584644  
 1 -4.194635 -2.434482 1.889417  
 6 -2.322945 -1.641105 1.236876  
 6 -1.646347 -0.433633 0.838292  
 6 3.495863 -2.990541 -0.365001  
 6 2.531183 -2.893978 -1.569868  
 1 3.072591 -2.597897 -2.482595  
 1 1.735281 -2.165170 -1.383330  
 1 2.057388 -3.871209 -1.753539  
 6 2.717932 -3.387415 0.908722  
 1 1.954629 -2.642970 1.154081  
 1 3.402887 -3.487189 1.766187  
 1 2.214860 -4.356273 0.760177  
 6 4.508833 -4.110006 -0.669459  
 1 5.216067 -4.265506 0.160187  
 1 5.086675 -3.909916 -1.585586



|   |           |           |           |   |           |           |           |
|---|-----------|-----------|-----------|---|-----------|-----------|-----------|
| 6 | 3.295951  | 0.283592  | 0.739297  | 1 | 0.093148  | -0.904868 | 2.833447  |
| 6 | 4.140797  | -0.816086 | 1.150343  | 1 | -0.101089 | -2.366422 | 3.829974  |
| 6 | 5.487602  | -0.745918 | 0.827872  | 6 | -0.124672 | 3.886893  | -0.791824 |
| 1 | 6.130788  | -1.580695 | 1.103870  | 6 | 1.259355  | 4.132126  | -0.083733 |
| 6 | 6.106707  | 0.351998  | 0.167789  | 6 | -1.062487 | 5.094306  | -0.651640 |
| 6 | 5.315045  | 1.436307  | -0.139876 | 1 | -0.555276 | 6.005608  | -0.994891 |
| 1 | 5.753131  | 2.322877  | -0.608643 | 1 | -1.955152 | 4.974949  | -1.282341 |
| 6 | 3.920007  | 1.431357  | 0.136555  | 1 | -1.390291 | 5.252014  | 0.384600  |
| 6 | 3.180550  | 2.628504  | -0.122784 | 6 | 0.077224  | 3.589169  | -2.288300 |
| 1 | 3.786761  | 3.491664  | -0.418881 | 1 | -0.865726 | 3.230570  | -2.725352 |
| 6 | -1.932705 | 2.520862  | 0.109830  | 1 | 0.371696  | 4.495567  | -2.834351 |
| 1 | -2.609116 | 3.327022  | -0.193807 | 1 | 0.856738  | 2.829630  | -2.439899 |
| 6 | -2.568829 | 1.429556  | 0.779352  | 6 | 2.119180  | 5.160798  | -0.830310 |
| 6 | -3.951809 | 1.560373  | 1.063869  | 1 | 2.461274  | 4.794438  | -1.807835 |
| 1 | -4.475810 | 2.454060  | 0.713315  | 1 | 1.545675  | 6.083153  | -0.991331 |
| 6 | -4.632747 | 0.594670  | 1.774075  | 1 | 3.002272  | 5.440084  | -0.237941 |
| 6 | -3.895552 | -0.540721 | 2.196932  | 6 | 1.063376  | 4.599296  | 1.373354  |
| 1 | -4.436886 | -1.295962 | 2.766097  | 1 | 2.031476  | 4.581522  | 1.895038  |
| 6 | -2.541435 | -0.741663 | 1.948938  | 1 | 0.674794  | 5.626578  | 1.409250  |
| 6 | -1.839888 | 0.269894  | 1.195821  | 1 | 0.370716  | 3.936406  | 1.911742  |
| 6 | 3.560434  | -1.990635 | 1.959407  | 6 | -6.105709 | 0.752277  | 2.122407  |
| 6 | 2.407526  | -2.672105 | 1.193486  | 6 | -6.334305 | 0.779316  | 3.643048  |
| 1 | 2.728841  | -3.011387 | 0.199828  | 6 | -6.974366 | -0.319773 | 1.446974  |
| 1 | 1.559571  | -1.993520 | 1.068112  | 1 | -6.423036 | 1.731639  | 1.723307  |
| 1 | 2.051909  | -3.552739 | 1.752896  | 1 | -5.737629 | 1.571008  | 4.123565  |
| 6 | 3.050095  | -1.439501 | 3.311653  | 1 | -7.396689 | 0.959770  | 3.876116  |
| 1 | 2.292112  | -0.660642 | 3.160948  | 1 | -6.052727 | -0.181095 | 4.106117  |
| 1 | 3.880809  | -1.013940 | 3.898253  | 1 | -6.826044 | -0.308492 | 0.358584  |
| 1 | 2.591931  | -2.248664 | 3.903560  | 1 | -6.711088 | -1.327673 | 1.809422  |
| 6 | 4.623147  | -3.064941 | 2.256135  | 1 | -8.042456 | -0.155887 | 1.666344  |
| 1 | 5.469414  | -2.670110 | 2.840566  | 6 | 7.592905  | 0.323660  | -0.152841 |
| 1 | 5.018941  | -3.514387 | 1.331495  | 6 | 7.937675  | -0.807782 | -1.136310 |
| 1 | 4.164962  | -3.873353 | 2.846830  | 6 | 8.452744  | 0.233106  | 1.119464  |
| 6 | -1.794198 | -1.970684 | 2.504546  | 1 | 7.833316  | 1.280289  | -0.648470 |
| 6 | -2.710143 | -2.866945 | 3.359111  | 1 | 7.349358  | -0.723274 | -2.063572 |
| 1 | -3.554080 | -3.271332 | 2.777627  | 1 | 9.006875  | -0.781662 | -1.402872 |
| 1 | -3.117497 | -2.333012 | 4.232552  | 1 | 7.728843  | -1.796574 | -0.695330 |
| 1 | -2.130163 | -3.724562 | 3.734729  | 1 | 8.230424  | 1.061202  | 1.810850  |
| 6 | -1.245778 | -2.833436 | 1.349415  | 1 | 8.272841  | -0.712362 | 1.657462  |
| 1 | -0.614631 | -2.252560 | 0.671743  | 1 | 9.525368  | 0.272539  | 0.868854  |
| 1 | -2.069663 | -3.261503 | 0.760338  | 6 | -4.309261 | -1.223894 | -1.640415 |
| 1 | -0.640363 | -3.664069 | 1.745670  | 6 | -3.261548 | -2.149242 | -1.565852 |
| 6 | -0.629280 | -1.497254 | 3.405122  | 6 | -1.952109 | -1.777544 | -1.880694 |
| 1 | -1.007949 | -0.887004 | 4.242087  | 6 | -1.658499 | -0.470029 | -2.277207 |

6 -2.712056 0.452457 -2.366959  
6 -4.021512 0.100482 -2.048789  
1 -3.455123 -3.173749 -1.251060  
1 -1.158408 -2.518045 -1.805237  
1 -2.534939 1.486684 -2.668307  
8 -4.990896 1.067343 -2.071409  
8 -5.601417 -1.502059 -1.336425  
6 -6.000727 0.931021 -3.067661  
1 -6.579152 0.003084 -2.936161  
1 -6.672353 1.794353 -2.959611  
1 -5.560054 0.943294 -4.081088  
6 -5.925951 -2.778582 -0.814859  
1 -5.371910 -2.984303 0.117273  
1 -7.000800 -2.759612 -0.595135  
1 -5.718892 -3.580818 -1.544088  
6 -0.265734 -0.063793 -2.680528  
1 -0.047463 -0.386656 -3.719158  
1 -0.164916 1.033138 -2.747521  
6 0.883505 -0.545780 -1.902087  
1 0.723641 -1.121526 -0.985586  
6 2.256557 -0.296674 -2.326923  
1 2.808823 -1.250315 -2.283975  
1 2.330243 0.169399 -3.317438  
1 2.761394 0.341460 -1.577261  
5 1.338272 -3.703913 -2.345501  
9 0.629910 -3.795696 -1.143813  
9 1.186095 -4.852637 -3.107640  
9 0.811669 -2.583753 -3.077536  
9 2.697668 -3.448263 -2.095835

-----  
**Structure S40. <sup>1</sup>TS13**  
-----

6 3.078875 -0.326086 -0.024937  
6 2.457776 -1.544432 -0.353794  
6 1.086003 -1.704841 -0.182064  
6 0.298209 -0.660614 0.341846  
6 0.922355 0.577302 0.633576  
6 2.286175 0.753623 0.470157  
1 3.046175 -2.376787 -0.737655  
1 0.630154 -2.661732 -0.439899  
1 0.341259 1.418511 1.017344  
8 2.857393 1.931345 0.838648  
8 4.390938 -0.087925 -0.130128  
6 3.386404 2.749586 -0.207595

1 2.597159 3.015608 -0.932424  
1 3.758974 3.665515 0.270094  
1 4.214378 2.250480 -0.734220  
6 5.265105 -1.102075 -0.615983  
1 5.002828 -1.394221 -1.646192  
1 6.271615 -0.666935 -0.606165  
1 5.244344 -1.990624 0.036081  
6 -1.383967 -0.409916 -0.784226  
1 -1.341614 0.647448 -1.041282  
1 -1.276967 -1.138070 -1.590240  
6 -1.217615 -0.827872 0.596195  
1 -1.551662 -0.052504 1.295655  
6 -1.731089 -2.201998 0.991714  
1 -1.298643 -2.509016 1.955005  
1 -2.822876 -2.138550 1.090817  
1 -1.496971 -2.969645 0.239545  
5 -4.082371 0.528923 -0.190470  
9 -4.225619 -0.135498 1.022005  
9 -5.297651 0.841352 -0.761959  
9 -3.264741 1.648557 -0.048365  
9 -3.387805 -0.388579 -1.109637

-----  
**Structure S41. 6**  
-----

6 1.746541 -0.516891 0.038650  
6 0.827403 -1.552025 -0.179851  
6 -0.548555 -1.318699 -0.063855  
6 -1.048187 -0.053489 0.269839  
6 -0.119743 0.981482 0.470398  
6 1.254732 0.771799 0.364500  
1 1.175902 -2.553581 -0.431973  
1 -1.233155 -2.153205 -0.233704  
1 -0.453213 1.990131 0.726965  
8 2.105303 1.810463 0.630337  
8 3.095513 -0.650931 -0.022206  
6 2.853458 2.316197 -0.472175  
1 2.182572 2.673324 -1.274608  
1 3.440822 3.165186 -0.095037  
1 3.536860 1.556761 -0.883978  
6 3.649965 -1.913159 -0.345239  
1 3.333106 -2.254336 -1.346715  
1 4.740270 -1.785271 -0.339029  
1 3.373466 -2.681487 0.398119  
6 -3.172113 0.147589 -1.016837

1 -2.679578 0.856334 -1.703928  
1 -3.089129 -0.869487 -1.439477  
6 -2.541002 0.213117 0.374481  
1 -2.676246 1.249454 0.727714  
6 -3.266034 -0.721180 1.352815  
1 -2.847116 -0.629212 2.366411  
1 -4.336841 -0.471442 1.391984  
1 -3.178140 -1.774889 1.042071  
9 -4.523879 0.475223 -0.947358

-----  
**Structure S42. 7**  
-----

6 -1.917589 -0.592120 -0.090184  
6 -0.968849 -1.590981 0.169932  
6 0.394322 -1.280069 0.214821  
6 0.863650 0.025147 0.008202  
6 -0.097122 1.018396 -0.240266  
6 -1.462568 0.731780 -0.292811  
1 -1.283879 -2.622484 0.328889  
1 1.110088 -2.082646 0.409906  
1 0.180652 2.058672 -0.409822  
8 -2.336276 1.743953 -0.594253  
8 -3.257986 -0.795788 -0.179984  
6 -3.213407 2.151954 0.451059  
1 -2.644439 2.497330 1.333655  
1 -3.807358 2.990423 0.060416  
1 -3.891431 1.338529 0.755122  
6 -3.769951 -2.100489 0.016265  
1 -3.537266 -2.484183 1.025615  
1 -4.859729 -2.028497 -0.096338  
1 -3.377384 -2.809959 -0.733643  
6 2.371267 0.315858 0.105807  
6 3.128461 -0.693986 -0.732408  
1 2.702403 -0.922269 -1.715091  
6 4.535326 -1.098196 -0.446499  
1 4.919280 -1.792593 -1.208864  
1 5.223751 -0.227084 -0.419013  
1 4.640286 -1.588778 0.538989  
6 2.786435 0.239286 1.596140  
1 2.609508 -0.765726 2.009037  
1 3.853116 0.480721 1.726337  
1 2.201255 0.959061 2.189302  
6 2.724148 1.731079 -0.419010  
1 2.394196 1.866916 -1.460298

1 2.262215 2.520051 0.196646  
1 3.814093 1.881241 -0.383240

-----  
**Structure S43. 8**  
-----

6 -1.726290 -0.578984 -0.037075  
6 -0.794801 -1.607346 0.239818  
6 0.557031 -1.379663 0.091474  
6 1.057016 -0.112357 -0.328932  
6 0.097424 0.914947 -0.605592  
6 -1.255353 0.707584 -0.467397  
1 -1.139358 -2.590509 0.556623  
1 1.242308 -2.200366 0.296060  
1 0.413722 1.896932 -0.956879  
8 -2.128778 1.684976 -0.810192  
8 -3.035244 -0.711754 0.051952  
6 -2.875999 2.296764 0.248368  
1 -2.197013 2.756436 0.986679  
1 -3.487928 3.079852 -0.217339  
1 -3.532992 1.571612 0.752024  
6 -3.631067 -1.952841 0.450828  
1 -3.311313 -2.228703 1.467294  
1 -4.713044 -1.781622 0.436389  
1 -3.371593 -2.752672 -0.259213  
6 2.534193 0.415487 0.486867  
6 2.521974 0.028569 -0.912068  
1 2.536187 0.874581 -1.607610  
6 3.212994 -1.193531 -1.476077  
1 2.725997 -1.506509 -2.410704  
1 4.257738 -0.930053 -1.703349  
1 3.227431 -2.048368 -0.788955  
6 3.023339 -0.499268 1.581843  
1 3.037576 -1.560512 1.314978  
1 4.061737 -0.202392 1.806441  
1 2.433938 -0.364734 2.500102  
6 2.523785 1.872794 0.879194  
1 2.236914 2.544611 0.062011  
1 1.872804 2.050373 1.747277  
1 3.553589 2.133321 1.176597

-----  
**Structure S44. <sup>1</sup>TS14**  
-----

6 -3.244945 -0.245771 -0.299958  
6 -2.695123 -1.526143 -0.115005

6 -1.379352 -1.678944 0.316061  
6 -0.573228 -0.562456 0.603632  
6 -1.131349 0.721515 0.409385  
6 -2.438734 0.893349 -0.026971  
1 -3.291793 -2.415297 -0.315348  
1 -0.991250 -2.690121 0.431719  
1 -0.558319 1.628687 0.598083  
8 -2.905323 2.155463 -0.238196  
8 -4.490546 -0.002958 -0.736770  
6 -3.931844 2.618466 0.640925  
1 -3.586140 2.601764 1.689646  
1 -4.148832 3.655486 0.351335  
1 -4.848260 2.015234 0.548828  
6 -5.362502 -1.087800 -1.030081  
1 -5.544714 -1.708395 -0.136688  
1 -6.308028 -0.640141 -1.359755  
1 -4.957474 -1.719548 -1.838072  
6 0.901029 -0.721198 1.093180  
6 1.395544 -0.599271 -0.290889  
1 1.442400 0.424440 -0.672926  
6 1.528477 -1.666508 -1.302752  
1 0.675730 -1.600946 -1.999391  
1 2.427835 -1.438769 -1.893787  
1 1.584549 -2.676223 -0.880886  
5 4.064098 0.651151 -0.554878  
9 4.065898 0.308165 -1.903978  
9 5.337404 0.824133 -0.055420  
9 3.258228 1.770395 -0.333853  
9 3.448927 -0.466298 0.166796  
6 1.353086 0.440175 1.993524  
1 0.685325 0.518994 2.863629  
1 2.377068 0.247143 2.337564  
1 1.373786 1.400823 1.463745  
6 1.193038 -2.058539 1.780047  
1 2.273131 -2.126971 1.971774  
1 0.657753 -2.105593 2.739331  
1 0.905009 -2.935163 1.186804

-----  
**Structure S45. 9**  
-----

6 -2.162712 -0.493220 -0.069737  
6 -1.391118 -1.607865 0.274351  
6 -0.008265 -1.488661 0.477113  
6 0.650695 -0.261087 0.349632

6 -0.142411 0.856625 0.019936  
6 -1.514859 0.761745 -0.192470  
1 -1.855678 -2.588261 0.380144  
1 0.544285 -2.391684 0.735191  
1 0.291873 1.852117 -0.089114  
8 -2.206178 1.883766 -0.563195  
8 -3.497771 -0.512259 -0.311261  
6 -3.132906 2.398725 0.389151  
1 -2.623870 2.659294 1.334947  
1 -3.563417 3.311184 -0.046837  
1 -3.941710 1.681148 0.599965  
6 -4.200030 -1.736712 -0.199276  
1 -4.136854 -2.151719 0.822229  
1 -5.250013 -1.516404 -0.432106  
1 -3.822974 -2.489049 -0.914312  
6 2.164255 -0.095454 0.549916  
6 2.782902 0.432027 -0.775786  
1 2.362326 1.429871 -0.988416  
6 2.622056 -0.454675 -1.996221  
1 1.557711 -0.605278 -2.226317  
1 3.103663 0.021278 -2.863371  
1 3.090233 -1.437475 -1.839523  
9 4.159070 0.632619 -0.567215  
6 2.435972 0.950065 1.656205  
1 2.005997 0.615492 2.612762  
1 3.518869 1.090533 1.787671  
1 1.998089 1.929613 1.411526  
6 2.860093 -1.406507 0.954494  
1 3.943471 -1.236728 1.028426  
1 2.499730 -1.753357 1.934635  
1 2.696219 -2.216250 0.229232

-----  
**Structure S46. 1TS15**  
-----

6 -3.509841 -0.423897 0.006827  
6 -2.713485 -1.555135 0.235973  
6 -1.345829 -1.532040 -0.053133  
6 -0.741156 -0.388452 -0.588992  
6 -1.539667 0.751676 -0.799984  
6 -2.901598 0.749885 -0.518752  
1 -3.154350 -2.469222 0.632153  
1 -0.765170 -2.437462 0.131067  
1 -1.116602 1.668195 -1.216024  
8 -3.638193 1.857831 -0.814005

8 -4.837173 -0.358315 0.229624  
 6 -4.194113 2.575471 0.288217  
 1 -3.399086 2.917116 0.974806  
 1 -4.704276 3.452380 -0.132983  
 1 -4.920277 1.964860 0.846656  
 6 -5.517653 -1.490970 0.750001  
 1 -5.128795 -1.774240 1.743106  
 1 -6.571556 -1.200896 0.844196  
 1 -5.438653 -2.355488 0.069066  
 6 1.350445 -0.064609 0.427523  
 6 0.763728 -0.335133 -0.914614  
 1 0.932124 0.564706 -1.522058  
 6 1.319754 -1.555173 -1.647076  
 1 0.851169 -1.631016 -2.638569  
 1 2.405721 -1.441207 -1.767849  
 1 1.129100 -2.495889 -1.111873  
 6 1.877977 -1.169921 1.249802  
 1 2.722303 -1.636966 0.718483  
 1 2.207118 -0.839182 2.240282  
 1 1.102900 -1.948097 1.343591  
 6 1.211447 1.261674 1.055716  
 1 0.864005 2.042907 0.370845  
 1 0.512106 1.165739 1.906073  
 1 2.191137 1.518462 1.488868  
 5 4.518813 0.292000 0.078382  
 9 5.528935 1.034679 -0.505042  
 9 4.344899 0.633684 1.425598  
 9 3.278085 0.584451 -0.603187  
 9 4.751403 -1.081824 -0.049119

-----  
**Structure S47. 10**  
 -----

6 -2.184323 -0.526953 -0.037859  
 6 -1.306041 -1.594892 0.186596  
 6 0.064327 -1.457549 -0.070205  
 6 0.602227 -0.257807 -0.551835  
 6 -0.288421 0.808379 -0.768153  
 6 -1.655450 0.695279 -0.522281  
 1 -1.682631 -2.549763 0.553330  
 1 0.712036 -2.317214 0.110740  
 1 0.071471 1.768518 -1.145376  
 8 -2.470952 1.757655 -0.805721  
 8 -3.526866 -0.569963 0.155492  
 6 -3.072637 2.406848 0.310798

1 -2.304147 2.794264 1.004410  
 1 -3.652185 3.252060 -0.086461  
 1 -3.747354 1.731150 0.860226  
 6 -4.116012 -1.763748 0.637789  
 1 -3.723640 -2.040215 1.632512  
 1 -5.193296 -1.568826 0.719454  
 1 -3.954564 -2.606949 -0.056788  
 6 2.889204 0.299061 0.466557  
 6 2.089779 -0.074684 -0.816348  
 1 2.197085 0.812107 -1.462894  
 6 2.720839 -1.253277 -1.571771  
 1 2.216623 -1.396620 -2.539469  
 1 3.785923 -1.055657 -1.757601  
 1 2.646759 -2.199902 -1.016016  
 6 2.986393 -0.813908 1.502330  
 1 3.412353 -1.728301 1.065974  
 1 3.639823 -0.490822 2.326526  
 1 1.995401 -1.048888 1.915096  
 6 2.402174 1.601491 1.090546  
 1 2.380231 2.405688 0.339441  
 1 1.391097 1.485327 1.505257  
 1 3.083641 1.899571 1.901408  
 9 4.212840 0.549278 0.021676

-----  
**Structure S48. Co<sup>II</sup>(salen)**  
 -----

27 -0.649678 0.000057 -0.000014  
 8 0.684544 1.309226 -0.053179  
 8 0.684302 -1.309359 0.053138  
 7 -2.019662 1.262437 0.295468  
 7 -2.019900 -1.262070 -0.295479  
 6 0.609697 2.599673 0.032758  
 6 1.807791 3.394850 -0.123029  
 6 1.692730 4.774421 0.000562  
 1 2.581666 5.396725 -0.105381  
 6 0.468460 5.432508 0.258480  
 6 -0.682044 4.687220 0.386935  
 1 -1.643600 5.174560 0.575760  
 6 -0.639585 3.273252 0.273420  
 6 -1.872123 2.551392 0.390235  
 1 -2.760961 3.167381 0.578093  
 6 -3.319159 0.598124 0.484068  
 1 -3.306926 0.174895 1.506913  
 6 -3.319271 -0.597512 -0.484079

1 -3.306954 -0.174284 -1.506924  
6 -4.575544 -1.454468 -0.326061  
1 -4.565770 -1.932235 0.669666  
1 -4.586121 -2.263032 -1.073650  
6 -5.835309 -0.592446 -0.484165  
1 -5.888748 -0.216173 -1.521627  
1 -6.732309 -1.213747 -0.330403  
6 -5.835199 0.593536 0.484138  
1 -5.888718 0.217272 1.521599  
1 -6.732080 1.215008 0.330369  
6 -4.575269 1.455318 0.326043  
1 -4.585699 2.263881 1.073634  
1 -4.565396 1.933085 -0.669683  
6 -1.872607 -2.551055 -0.390213  
1 -2.761564 -3.166880 -0.578045  
6 -0.640204 -3.273146 -0.273389  
6 -0.682932 -4.687109 -0.386852  
1 -1.644583 -5.174274 -0.575649  
6 0.467432 -5.432612 -0.258380  
6 1.691828 -4.774747 -0.000496  
1 2.580647 -5.397215 0.105462  
6 1.807152 -3.395192 0.123036  
6 0.609208 -2.599795 -0.032766  
6 3.154742 2.708268 -0.423945  
6 3.053479 1.937718 -1.761297  
1 2.840003 2.629721 -2.593077  
1 2.259891 1.181435 -1.727325  
1 4.006157 1.428870 -1.983750  
6 3.519245 1.735463 0.721179  
1 2.762684 0.951205 0.832880  
1 3.606425 2.276554 1.678181  
1 4.489874 1.253352 0.518155  
6 4.302870 3.724732 -0.557636  
1 4.463656 4.297053 0.370235  
1 4.134335 4.440442 -1.378465  
1 5.241177 3.191302 -0.778643  
6 3.154227 -2.708843 0.423923  
6 4.302125 -3.725524 0.557965  
1 4.462869 -4.298106 -0.369753  
1 4.133363 -4.440996 1.378953  
1 5.240527 -3.192243 0.778924  
6 3.519061 -1.736379 -0.721384  
1 2.762683 -0.951982 -0.833341  
1 3.606222 -2.277707 -1.678253

1 4.489775 -1.254433 -0.518369  
6 3.052985 -1.937960 1.761083  
1 2.839263 -2.629721 2.593001  
1 2.259562 -1.181512 1.726842  
1 4.005747 -1.429264 1.983524  
1 0.443210 -6.521090 -0.347312  
1 0.444446 6.520988 0.347452

---

### Structure S49. 11

---

6 3.388858 -1.347258 -0.470826  
6 3.997348 -0.094406 -0.360219  
6 2.029946 -1.470167 -0.188075  
6 1.263253 -0.350776 0.174574  
6 1.871490 0.919757 0.308886  
6 3.245684 1.013737 0.035942  
1 3.970036 -2.223920 -0.767025  
1 5.063966 0.020395 -0.571085  
1 1.539061 -2.443954 -0.247868  
6 -0.175821 -0.639425 0.495219  
6 1.119797 2.152566 0.747457  
1 3.737867 1.984273 0.145302  
8 -0.507411 -1.588725 1.185550  
7 -1.127051 0.247521 0.000195  
9 -0.667251 0.873431 -1.175262  
6 -2.587479 -0.027950 -0.112363  
1 0.363753 1.926261 1.513487  
1 0.585070 2.609758 -0.100035  
1 1.809974 2.904555 1.157968  
6 -3.140999 -0.240684 1.306096  
6 -2.821376 -1.256104 -1.003928  
6 -3.244937 1.221505 -0.719083  
1 -2.735644 -1.146228 1.770477  
1 -4.236788 -0.331278 1.248575  
1 -2.901130 0.620621 1.949067  
1 -3.011931 2.118584 -0.124626  
1 -4.336519 1.084098 -0.722058  
1 -2.919424 1.395906 -1.753225  
1 -2.380022 -2.155964 -0.551682  
1 -2.369142 -1.101309 -1.996134  
1 -3.899808 -1.430283 -1.141630

---

### Structure S50. <sup>2</sup>INT5

---

|    |           |           |           |   |           |           |           |
|----|-----------|-----------|-----------|---|-----------|-----------|-----------|
| 9  | 0.815954  | -0.347355 | 1.164778  | 1 | 1.290104  | -1.630287 | -3.295723 |
| 7  | 1.006114  | -0.570415 | 2.552814  | 6 | 3.297250  | -1.558172 | -2.503167 |
| 6  | -0.187957 | -1.270394 | 3.105193  | 1 | 3.796492  | -1.249348 | -1.570276 |
| 6  | -0.140441 | -1.156747 | 4.637063  | 1 | 3.663029  | -0.894611 | -3.302370 |
| 1  | 0.686683  | -1.731668 | 5.067658  | 6 | 3.662233  | -3.010323 | -2.836494 |
| 1  | -0.035070 | -0.104859 | 4.944883  | 1 | 3.259406  | -3.270829 | -3.832054 |
| 1  | -1.090449 | -1.537095 | 5.043126  | 1 | 4.757706  | -3.108255 | -2.907364 |
| 6  | -0.186153 | -2.734440 | 2.644621  | 6 | 3.106864  | -3.986983 | -1.796394 |
| 1  | 0.698165  | -3.264823 | 3.027600  | 1 | 3.587012  | -3.792087 | -0.820633 |
| 1  | -1.087682 | -3.250388 | 3.008060  | 1 | 3.358542  | -5.024576 | -2.069096 |
| 1  | -0.189237 | -2.786067 | 1.546614  | 6 | 1.586706  | -3.844324 | -1.644861 |
| 6  | -1.430335 | -0.531507 | 2.585955  | 1 | 1.227873  | -4.526410 | -0.858078 |
| 1  | -2.330177 | -1.012284 | 2.995909  | 1 | 1.082749  | -4.136843 | -2.583236 |
| 1  | -1.421963 | 0.521396  | 2.904651  | 6 | 1.995581  | 1.002275  | -2.051450 |
| 1  | -1.498665 | -0.557413 | 1.493544  | 1 | 2.999400  | 0.925204  | -2.486883 |
| 6  | 2.336555  | -0.893117 | 2.799493  | 6 | 1.595540  | 2.325220  | -1.665222 |
| 8  | 2.651639  | -1.560299 | 3.769883  | 6 | 2.530957  | 3.377583  | -1.832555 |
| 6  | 3.355853  | -0.350015 | 1.836799  | 1 | 3.491315  | 3.160314  | -2.309931 |
| 6  | 3.388719  | 0.990627  | 1.383111  | 6 | 2.240800  | 4.649811  | -1.389694 |
| 6  | 4.363220  | -1.254078 | 1.462031  | 6 | 1.006821  | 4.890132  | -0.742983 |
| 6  | 4.442482  | 1.359268  | 0.530452  | 1 | 0.821667  | 5.900536  | -0.377178 |
| 6  | 5.391430  | -0.866193 | 0.604018  | 6 | 0.043343  | 3.907428  | -0.550261 |
| 6  | 5.426342  | 0.450034  | 0.135235  | 6 | 0.317067  | 2.580354  | -1.056653 |
| 1  | 4.486763  | 2.391289  | 0.174221  | 6 | -5.029589 | 0.210421  | -0.200687 |
| 1  | 6.161213  | -1.583321 | 0.308924  | 6 | -4.866315 | 0.942478  | -1.553019 |
| 1  | 6.227632  | 0.774606  | -0.534073 | 1 | -5.412935 | 0.412740  | -2.351048 |
| 27 | -0.453969 | -0.199926 | -1.194494 | 1 | -3.811533 | 1.014198  | -1.844019 |
| 8  | -2.283228 | -0.340119 | -0.780460 | 1 | -5.275415 | 1.964421  | -1.486305 |
| 8  | -0.576816 | 1.654234  | -0.924087 | 6 | -4.313392 | 1.004570  | 0.916601  |
| 7  | -0.200253 | -2.071064 | -1.158472 | 1 | -3.245607 | 1.116145  | 0.702764  |
| 7  | 1.296431  | -0.082195 | -1.906581 | 1 | -4.426907 | 0.498303  | 1.889404  |
| 6  | -3.030735 | -1.383575 | -0.600531 | 1 | -4.753880 | 2.010950  | 1.009908  |
| 6  | -4.433562 | -1.208353 | -0.299478 | 6 | -6.531540 | 0.182249  | 0.134953  |
| 6  | -5.203622 | -2.349040 | -0.101586 | 1 | -6.732738 | -0.292154 | 1.109113  |
| 1  | -6.263830 | -2.245122 | 0.130416  | 1 | -7.122076 | -0.343515 | -0.632660 |
| 6  | -4.683844 | -3.660478 | -0.181991 | 1 | -6.914199 | 1.213930  | 0.190008  |
| 6  | -3.348606 | -3.838491 | -0.469955 | 6 | -1.262713 | 4.175440  | 0.222607  |
| 1  | -2.922412 | -4.844352 | -0.535141 | 6 | -1.355566 | 5.631509  | 0.711722  |
| 6  | -2.502514 | -2.720058 | -0.681288 | 1 | -1.359349 | 6.352490  | -0.121873 |
| 6  | -1.115350 | -2.970345 | -0.953601 | 1 | -0.530101 | 5.896931  | 1.391824  |
| 1  | -0.821378 | -4.027912 | -0.958467 | 1 | -2.295028 | 5.771999  | 1.269869  |
| 6  | 1.225756  | -2.400315 | -1.301994 | 6 | -2.487237 | 3.901935  | -0.680840 |
| 1  | 1.693819  | -2.140359 | -0.334427 | 1 | -2.511505 | 2.858172  | -1.012524 |
| 6  | 1.786344  | -1.403532 | -2.332176 | 1 | -2.466243 | 4.551226  | -1.572034 |

1 -3.420464 4.114421 -0.133296  
 6 -1.308442 3.258274 1.469117  
 1 -0.477480 3.491831 2.155211  
 1 -1.238301 2.201864 1.186881  
 1 -2.251918 3.405659 2.020478  
 1 -5.340252 -4.517339 -0.014587  
 1 2.956020 5.465341 -1.518315  
 6 2.363789 2.020907 1.783698  
 1 1.427064 1.872863 1.231077  
 1 2.116045 1.959174 2.853936  
 1 2.720428 3.036765 1.564484  
 1 4.328020 -2.271684 1.857630

-----  
**Structure S51. <sup>2</sup>TS16**  
 -----

9 0.412629 -0.427109 1.017969  
 7 0.706692 -0.546480 2.722858  
 6 -0.484296 -1.227249 3.239938  
 6 -0.389679 -1.178430 4.782916  
 1 0.449189 -1.781452 5.150718  
 1 -0.261642 -0.142106 5.132621  
 1 -1.328734 -1.569560 5.205923  
 6 -0.588318 -2.673878 2.735264  
 1 0.266328 -3.274300 3.076451  
 1 -1.515501 -3.141857 3.100605  
 1 -0.613898 -2.678399 1.637481  
 6 -1.710117 -0.414820 2.793456  
 1 -2.621437 -0.847073 3.233699  
 1 -1.627044 0.632701 3.120451  
 1 -1.806899 -0.423833 1.702821  
 6 1.988585 -1.036509 2.811490  
 8 2.294133 -1.908286 3.622428  
 6 3.036088 -0.406447 1.934384  
 6 3.067218 0.958711 1.553501  
 6 4.086515 -1.263721 1.561961  
 6 4.164987 1.394531 0.791012  
 6 5.159565 -0.809252 0.797784  
 6 5.195868 0.533051 0.409992  
 1 4.207207 2.445833 0.495482  
 1 5.961977 -1.494253 0.512642  
 1 6.030791 0.913737 -0.184734  
 27 -0.222469 -0.184229 -0.969980  
 8 -2.065071 -0.420007 -0.776506  
 8 -0.486853 1.655027 -0.787832

7 0.088157 -2.045455 -1.120110  
 7 1.454831 0.043007 -1.824982  
 6 -2.788776 -1.500305 -0.709456  
 6 -4.216321 -1.383212 -0.546166  
 6 -4.952039 -2.560102 -0.436267  
 1 -6.031599 -2.504170 -0.296424  
 6 -4.373156 -3.845487 -0.498031  
 6 -3.013197 -3.964507 -0.689669  
 1 -2.543172 -4.950334 -0.754819  
 6 -2.203633 -2.807591 -0.799991  
 6 -0.794158 -2.987240 -1.016538  
 1 -0.457032 -4.028841 -1.090007  
 6 1.524673 -2.290912 -1.294808  
 1 1.994073 -2.024133 -0.330974  
 6 1.994287 -1.238576 -2.314989  
 1 1.471456 -1.458810 -3.265218  
 6 3.502956 -1.304249 -2.548649  
 1 4.018460 -0.988517 -1.627840  
 1 3.798238 -0.605970 -3.347664  
 6 3.933144 -2.727557 -2.926865  
 1 3.505699 -2.991767 -3.911153  
 1 5.028537 -2.761539 -3.042772  
 6 3.474981 -3.752525 -1.885805  
 1 3.975537 -3.544940 -0.923542  
 1 3.777212 -4.768481 -2.186698  
 6 1.955111 -3.703367 -1.682372  
 1 1.659466 -4.419613 -0.899507  
 1 1.441719 -4.004594 -2.612992  
 6 2.089594 1.170408 -1.959061  
 1 3.078826 1.155935 -2.432006  
 6 1.632326 2.458157 -1.538891  
 6 2.508177 3.563046 -1.699354  
 1 3.488470 3.398839 -2.156317  
 6 2.130413 4.816724 -1.275613  
 6 0.859808 4.993299 -0.677681  
 1 0.600513 5.998255 -0.344167  
 6 -0.049826 3.960040 -0.495989  
 6 0.335210 2.639999 -0.944500  
 6 -4.884618 0.006474 -0.515203  
 6 -4.612647 0.735108 -1.852260  
 1 -5.049032 0.176723 -2.696999  
 1 -3.536953 0.851352 -2.033241  
 1 -5.068538 1.738891 -1.839669  
 6 -4.333228 0.846009 0.660061

|   |           |           |           |    |           |           |           |
|---|-----------|-----------|-----------|----|-----------|-----------|-----------|
| 1 | -3.258007 | 1.021158  | 0.556919  | 1  | -1.251506 | 0.233953  | 2.072923  |
| 1 | -4.515097 | 0.341460  | 1.622677  | 6  | 1.989479  | -1.192170 | 2.908911  |
| 1 | -4.839301 | 1.824786  | 0.693730  | 8  | 2.186470  | -2.378136 | 3.195343  |
| 6 | -6.410888 | -0.094067 | -0.340762 | 6  | 2.993907  | -0.418108 | 2.092659  |
| 1 | -6.691111 | -0.573389 | 0.611218  | 6  | 2.924085  | 0.964338  | 1.780169  |
| 1 | -6.891338 | -0.650995 | -1.161347 | 6  | 4.065236  | -1.185993 | 1.601703  |
| 1 | -6.845674 | 0.918067  | -0.336382 | 6  | 3.949952  | 1.506132  | 0.985343  |
| 6 | -1.413376 | 4.171778  | 0.189873  | 6  | 5.069682  | -0.626624 | 0.814385  |
| 6 | -1.622457 | 5.636949  | 0.611748  | 6  | 5.008903  | 0.734594  | 0.503814  |
| 1 | -1.610488 | 6.325676  | -0.248610 | 1  | 3.904674  | 2.568505  | 0.732884  |
| 1 | -0.862984 | 5.976090  | 1.334669  | 1  | 5.892915  | -1.246683 | 0.449845  |
| 1 | -2.604798 | 5.741748  | 1.099086  | 1  | 5.784980  | 1.198288  | -0.111910 |
| 6 | -2.553551 | 3.793524  | -0.783394 | 27 | -0.207341 | -0.203644 | -0.998604 |
| 1 | -2.496387 | 2.739251  | -1.075082 | 8  | -2.055112 | -0.447622 | -0.946029 |
| 1 | -2.509115 | 4.411105  | -1.695944 | 8  | -0.506996 | 1.641277  | -0.904421 |
| 1 | -3.533320 | 3.966768  | -0.308607 | 7  | 0.099945  | -2.078044 | -1.208721 |
| 6 | -1.494332 | 3.298959  | 1.465779  | 7  | 1.443694  | 0.013187  | -1.965737 |
| 1 | -0.716310 | 3.592168  | 2.189468  | 6  | -2.772976 | -1.530058 | -0.806664 |
| 1 | -1.365818 | 2.235748  | 1.235267  | 6  | -4.191197 | -1.406558 | -0.601125 |
| 1 | -2.474653 | 3.427686  | 1.954016  | 6  | -4.924115 | -2.582108 | -0.446329 |
| 1 | -5.004377 | -4.731673 | -0.402223 | 1  | -5.998726 | -2.521062 | -0.274783 |
| 1 | 2.799135  | 5.672465  | -1.391370 | 6  | -4.347493 | -3.867097 | -0.493920 |
| 6 | 2.004093  | 1.955858  | 1.935106  | 6  | -2.989260 | -3.990402 | -0.702893 |
| 1 | 1.067807  | 1.736694  | 1.409291  | 1  | -2.517726 | -4.976408 | -0.743684 |
| 1 | 1.771075  | 1.912440  | 3.009267  | 6  | -2.186517 | -2.836067 | -0.857906 |
| 1 | 2.317806  | 2.978184  | 1.681071  | 6  | -0.777242 | -3.015503 | -1.081180 |
| 1 | 4.048384  | -2.302123 | 1.897667  | 1  | -0.434391 | -4.056200 | -1.140217 |

---

**Structure S52. <sup>4</sup>INT6**

---

|   |           |           |          |   |          |           |           |
|---|-----------|-----------|----------|---|----------|-----------|-----------|
| 9 | 0.482364  | -0.390218 | 0.731706 | 1 | 1.986350 | -1.994100 | -0.399913 |
| 7 | 0.928583  | -0.542765 | 3.466478 | 6 | 2.001625 | -1.275187 | -2.415469 |
| 6 | -0.422013 | -1.077729 | 3.589672 | 1 | 1.492555 | -1.531173 | -3.363919 |
| 6 | -0.628386 | -1.374166 | 5.091955 | 6 | 3.514735 | -1.324499 | -2.625876 |
| 1 | 0.065889  | -2.159538 | 5.427711 | 1 | 4.011058 | -0.979424 | -1.703767 |
| 1 | -0.452599 | -0.472434 | 5.698456 | 1 | 3.812248 | -0.642796 | -3.438377 |
| 1 | -1.659973 | -1.721065 | 5.266446 | 6 | 3.967801 | -2.752249 | -2.958772 |
| 6 | -0.714904 | -2.332425 | 2.748540 | 1 | 3.553699 | -3.050487 | -3.939077 |
| 1 | -0.112921 | -3.188129 | 3.080158 | 1 | 5.064548 | -2.773324 | -3.063225 |
| 1 | -1.781863 | -2.592514 | 2.837081 | 6 | 3.514377 | -3.751974 | -1.891422 |
| 1 | -0.491242 | -2.125250 | 1.694821 | 1 | 4.002030 | -3.509053 | -0.931162 |
| 6 | -1.372812 | 0.058655  | 3.148178 | 1 | 3.832563 | -4.772129 | -2.159501 |
| 1 | -2.414315 | -0.236886 | 3.349271 | 6 | 1.992184 | -3.718802 | -1.702190 |
| 1 | -1.163791 | 0.991752  | 3.692448 | 1 | 1.700285 | -4.410852 | -0.896772 |
|   |           |           |          | 1 | 1.490855 | -4.056542 | -2.627018 |
|   |           |           |          | 6 | 2.089556 | 1.136135  | -2.049454 |

|   |           |           |           |    |           |                     |
|---|-----------|-----------|-----------|----|-----------|---------------------|
| 1 | 3.086741  | 1.123566  | -2.505847 |    |           |                     |
| 6 | 1.646279  | 2.418416  | -1.597313 | 27 | -0.576547 | -0.098976 0.200929  |
| 6 | 2.546150  | 3.507871  | -1.724687 | 8  | 0.461670  | 1.403875 -0.214274  |
| 1 | 3.532358  | 3.330744  | -2.163036 | 8  | 0.943231  | -1.137057 -0.094864 |
| 6 | 2.183660  | 4.762253  | -1.290875 | 7  | -2.158677 | 0.967425 0.320543   |
| 6 | 0.904455  | 4.952816  | -0.720424 | 7  | -1.756851 | -1.453004 -0.541551 |
| 1 | 0.654392  | 5.957978  | -0.381391 | 6  | 0.203635  | 2.677289 -0.115237  |
| 6 | -0.028552 | 3.933865  | -0.568369 | 6  | 1.276260  | 3.622958 -0.280108  |
| 6 | 0.344736  | 2.612319  | -1.018852 | 6  | 0.961402  | 4.977281 -0.190753  |
| 6 | -4.849897 | -0.014542 | -0.535438 | 1  | 1.753686  | 5.717402 -0.305139  |
| 6 | -4.632776 | 0.731120  | -1.872543 | 6  | -0.343349 | 5.455337 0.049397   |
| 1 | -5.105571 | 0.184308  | -2.705221 | 6  | -1.373288 | 4.552562 0.216253   |
| 1 | -3.566233 | 0.850256  | -2.098182 | 1  | -2.392937 | 4.898496 0.409767   |
| 1 | -5.088138 | 1.734040  | -1.826782 | 6  | -1.119350 | 3.162307 0.145192   |
| 6 | -4.237583 | 0.796538  | 0.630235  | 6  | -2.224158 | 2.256215 0.309849   |
| 1 | -3.161582 | 0.946229  | 0.494113  | 1  | -3.208820 | 2.726756 0.428667   |
| 1 | -4.397158 | 0.279982  | 1.590653  | 6  | -3.309595 | 0.072875 0.463487   |
| 1 | -4.717381 | 1.786563  | 0.696843  | 1  | -3.150400 | -0.447325 1.424521  |
| 6 | -6.367563 | -0.107325 | -0.295787 | 6  | -3.147550 | -0.982155 -0.651481 |
| 1 | -6.610371 | -0.595671 | 0.661687  | 1  | -3.236803 | -0.447179 -1.616051 |
| 1 | -6.886466 | -0.650843 | -1.101961 | 6  | -4.237605 | -2.052255 -0.568386 |
| 1 | -6.794030 | 0.907657  | -0.260528 | 1  | -4.093565 | -2.633425 0.359318  |
| 6 | -1.403142 | 4.174184  | 0.086458  | 1  | -4.153279 | -2.756492 -1.410823 |
| 6 | -1.600109 | 5.647811  | 0.484973  | 6  | -5.630737 | -1.409005 -0.572139 |
| 1 | -1.560112 | 6.325195  | -0.383565 | 1  | -5.804672 | -0.923226 -1.549226 |
| 1 | -0.853607 | 5.986303  | 1.221364  | 1  | -6.398614 | -2.192917 -0.471958 |
| 1 | -2.591446 | 5.771200  | 0.948991  | 6  | -5.777834 | -0.370455 0.543353  |
| 6 | -2.532650 | 3.800937  | -0.901005 | 1  | -5.701390 | -0.872458 1.524069  |
| 1 | -2.496371 | 2.740045  | -1.170913 | 1  | -6.775063 | 0.096306 0.504874   |
| 1 | -2.457931 | 4.398493  | -1.824838 | 6  | -4.695567 | 0.712626 0.446710   |
| 1 | -3.516186 | 4.007084  | -0.447687 | 1  | -4.794551 | 1.423509 1.282399   |
| 6 | -1.515970 | 3.319620  | 1.370218  | 1  | -4.827154 | 1.284798 -0.489063  |
| 1 | -0.754025 | 3.618252  | 2.107718  | 6  | -1.400544 | -2.683315 -0.756197 |
| 1 | -1.383982 | 2.254809  | 1.155048  | 1  | -2.167374 | -3.396113 -1.087340 |
| 1 | -2.506792 | 3.453880  | 1.834805  | 6  | -0.092284 | -3.236902 -0.586158 |
| 1 | -4.975429 | -4.751028 | -0.363724 | 6  | 0.071798  | -4.632755 -0.784803 |
| 1 | 2.871099  | 5.606292  | -1.378115 | 1  | -0.794633 | -5.230848 -1.082196 |
| 6 | 1.800311  | 1.867719  | 2.210911  | 6  | 1.300428  | -5.222636 -0.592597 |
| 1 | 0.871034  | 1.533313  | 1.732567  | 6  | 2.394556  | -4.427301 -0.180055 |
| 1 | 1.637641  | 1.831192  | 3.297853  | 1  | 3.346042  | -4.932725 -0.012507 |
| 1 | 1.997930  | 2.908173  | 1.914326  | 6  | 2.306993  | -3.056502 0.028779  |
| 1 | 4.090979  | -2.245511 | 1.862786  | 6  | 1.031429  | -2.422872 -0.207240 |
|   |           |           |           | 6  | 2.716052  | 3.124400 -0.512055  |
|   |           |           |           | 6  | 2.786571  | 2.302828 -1.820535  |

-----  
**Structure S53.** Co<sup>III</sup>(salen)-F

1 2. 529586 2. 932351 -2. 688909  
 1 2. 098864 1. 449142 -1. 796652  
 1 3. 807979 1. 917069 -1. 974480  
 6 3. 159046 2. 256417 0. 690257  
 1 2. 520154 1. 374169 0. 812391  
 1 3. 124387 2. 841293 1. 624255  
 1 4. 196336 1. 911427 0. 548849  
 6 3. 713429 4. 289771 -0. 640368  
 1 3. 755180 4. 906720 0. 271746  
 1 3. 479246 4. 948793 -1. 492016  
 1 4. 725417 3. 888092 -0. 807987  
 6 3. 499467 -2. 212137 0. 516563  
 6 4. 753518 -3. 072939 0. 751080  
 1 5. 107090 -3. 556254 -0. 174238  
 1 4. 588293 -3. 857352 1. 507210  
 1 5. 572274 -2. 434451 1. 119354  
 6 3. 858861 -1. 144733 -0. 543190  
 1 3. 024193 -0. 459513 -0. 723006  
 1 4. 130946 -1. 621408 -1. 499864  
 1 4. 725206 -0. 552055 -0. 206479  
 6 3. 134755 -1. 536306 1. 861968  
 1 2. 998274 -2. 296199 2. 649265  
 1 2. 207967 -0. 952167 1. 798812  
 1 3. 948071 -0. 863786 2. 181928  
 9 -0. 689888 -0. 465659 2. 004235  
 1 -0. 527421 6. 530313 0. 106986  
 1 1. 434711 -6. 296541 -0. 739039

-----  
**Structure S54. 12**  
 -----

6 3. 518200 -1. 086115 0. 063093  
 6 3. 914163 0. 254001 0. 091202  
 6 2. 163434 -1. 392098 -0. 028883  
 6 1. 189097 -0. 380110 -0. 104461  
 6 1. 581384 0. 982178 -0. 066096  
 6 2. 953844 1. 265296 0. 031046  
 1 4. 261042 -1. 886161 0. 111389  
 1 4. 973411 0. 515096 0. 163722  
 1 1. 826184 -2. 429994 -0. 050154  
 6 -0. 231381 -0. 853562 -0. 195494  
 6 0. 602095 2. 128009 -0. 108675  
 1 3. 274408 2. 310211 0. 062761  
 8 -0. 532580 -2. 041959 -0. 060130  
 7 -1. 200220 0. 040807 -0. 572583

6 -2. 517858 0. 115780 0. 044648  
 1 -0. 125548 2. 069685 0. 716395  
 1 0. 023317 2. 131545 -1. 045261  
 1 1. 124062 3. 092875 -0. 021182  
 6 -2. 489823 -0. 169376 1. 555759  
 6 -3. 408370 -0. 922845 -0. 685735  
 6 -3. 064014 1. 528841 -0. 228637  
 1 -2. 124213 -1. 185185 1. 760796  
 1 -3. 500466 -0. 073831 1. 982450  
 1 -1. 833476 0. 547931 2. 074565  
 1 -2. 462591 2. 294255 0. 284924  
 1 -4. 100030 1. 609490 0. 135501  
 1 -3. 053223 1. 749995 -1. 306714  
 1 -3. 031535 -1. 938038 -0. 506094  
 1 -3. 412506 -0. 736506 -1. 770441  
 1 -4. 441274 -0. 841344 -0. 310143

-----  
**Structure S55. [Co<sup>IV</sup>(salen)-F]<sup>+</sup>**  
 -----

27 -0. 593374 -0. 106837 0. 238537  
 8 0. 383520 1. 399468 -0. 207040  
 8 0. 988133 -1. 107140 -0. 047755  
 7 -2. 197750 0. 866762 0. 379868  
 7 -1. 717458 -1. 510674 -0. 586524  
 6 0. 097981 2. 665815 -0. 078465  
 6 1. 142168 3. 640002 -0. 257299  
 6 0. 784679 4. 980749 -0. 130501  
 1 1. 546874 5. 749380 -0. 253943  
 6 -0. 526770 5. 408796 0. 159182  
 6 -1. 531282 4. 476042 0. 336064  
 1 -2. 552377 4. 791988 0. 564641  
 6 -1. 238031 3. 099843 0. 226973  
 6 -2. 306919 2. 155690 0. 387257  
 1 -3. 307827 2. 584723 0. 515109  
 6 -3. 325822 -0. 071117 0. 464146  
 1 -3. 176576 -0. 626725 1. 406086  
 6 -3. 117773 -1. 072357 -0. 699279  
 1 -3. 179721 -0. 487962 -1. 635455  
 6 -4. 183478 -2. 164820 -0. 704684  
 1 -4. 062295 -2. 787846 0. 198753  
 1 -4. 052021 -2. 820051 -1. 580451  
 6 -5. 587779 -1. 545913 -0. 720747  
 1 -5. 741137 -1. 013272 -1. 676066  
 1 -6. 341071 -2. 348307 -0. 685475

6 -5.785820 -0.573343 0.444471  
1 -5.727404 -1.123655 1.399893  
1 -6.789234 -0.122293 0.401702  
6 -4.726916 0.536578 0.433105  
1 -4.865730 1.204001 1.297833  
1 -4.842858 1.146520 -0.480238  
6 -1.340441 -2.738053 -0.676436  
1 -2.079814 -3.510769 -0.924489  
6 0.007346 -3.236201 -0.474631  
6 0.225351 -4.603498 -0.620127  
1 -0.608025 -5.261064 -0.879306  
6 1.507740 -5.141231 -0.439362  
6 2.593186 -4.314671 -0.108610  
1 3.565275 -4.784989 0.031495  
6 2.463384 -2.936781 0.047191  
6 1.130519 -2.365546 -0.148166  
6 2.587091 3.197787 -0.549572  
6 2.637818 2.398295 -1.872922  
1 2.322281 3.028286 -2.720620  
1 1.990904 1.513184 -1.844249  
1 3.668642 2.062716 -2.070554  
6 3.103804 2.335734 0.627181  
1 2.505900 1.428155 0.766528  
1 3.085649 2.910527 1.567243  
1 4.146299 2.032946 0.440984  
6 3.534389 4.401706 -0.698738  
1 3.588170 5.007612 0.219588  
1 3.245605 5.060369 -1.533304  
1 4.552557 4.038913 -0.908092  
6 3.636302 -2.034007 0.436327  
6 4.936435 -2.837250 0.614775  
1 5.249055 -3.337095 -0.315910  
1 4.855653 -3.596411 1.408713  
1 5.747154 -2.151589 0.903518  
6 3.876901 -0.987561 -0.681541  
1 3.022782 -0.316038 -0.810105  
1 4.084297 -1.483096 -1.643798  
1 4.755928 -0.376332 -0.425489  
6 3.321603 -1.333134 1.784543  
1 3.241420 -2.073312 2.596549  
1 2.386778 -0.760288 1.756206  
1 4.141453 -0.643214 2.038307  
9 -0.704448 -0.687890 1.958486  
1 -0.740566 6.475963 0.245501

1 1.664375 -6.215910 -0.553814

---

**Structure S56. 15**

---

6 3.426460 -1.259001 -0.188873  
6 3.985455 0.021140 -0.171718  
6 2.044118 -1.400371 -0.067971  
6 1.176680 -0.299217 0.051710  
6 1.745596 1.003324 0.076787  
6 3.143751 1.127356 -0.032781  
1 4.064239 -2.142964 -0.290960  
1 5.067526 0.161462 -0.258378  
1 1.573727 -2.385474 -0.050645  
6 -0.319541 -0.645068 0.159003  
6 0.930607 2.263713 0.229503  
1 3.583932 2.130047 -0.005736  
8 -0.590213 -1.840346 0.470551  
7 -1.140031 0.349769 -0.129324  
6 -2.579520 0.104046 -0.102866  
1 0.265177 2.202647 1.102948  
1 0.246545 2.394998 -0.620427  
1 1.585797 3.146419 0.328503  
6 -3.064621 -0.313491 1.304285  
6 -2.999336 -0.972867 -1.130296  
6 -3.258430 1.434254 -0.481635  
1 -2.581380 -1.256412 1.594375  
1 -4.162546 -0.439680 1.340176  
1 -2.784158 0.458011 2.041891  
1 -2.977834 2.224472 0.234943  
1 -4.360453 1.350429 -0.492875  
1 -2.923527 1.763665 -1.479657  
1 -2.527572 -1.931303 -0.873088  
1 -2.658150 -0.680830 -2.138398  
1 -4.096721 -1.104010 -1.162700

---

**Structure S57. <sup>2</sup>TS17**

---

6 3.583771 -1.005253 -0.054804  
6 3.927810 0.352398 -0.054435  
6 2.240631 -1.378513 -0.034426  
6 1.234990 -0.402880 -0.010186  
6 1.576801 0.967407 0.023561  
6 2.931916 1.330814 -0.019707  
1 4.364700 -1.769437 -0.080669

1 4.979510 0.650297 -0.078172  
 1 1.942961 -2.429062 -0.047997  
 6 -0.201783 -0.855408 -0.043043  
 6 0.483868 1.975795 0.119193  
 1 3.203697 2.389874 -0.009416  
 8 -0.518720 -2.023889 0.171724  
 7 -1.104408 0.105515 -0.414575  
 6 -2.524243 0.117904 -0.032661  
 1 0.182901 2.234837 1.145560  
 1 -0.490317 1.279547 -0.314905  
 1 0.592349 2.867198 -0.514565  
 6 -2.707998 -0.149745 1.470337  
 6 -3.247842 -0.960587 -0.867794  
 6 -3.077402 1.503916 -0.400032  
 1 -2.305876 -1.135318 1.743576  
 1 -3.775940 -0.124769 1.739211  
 1 -2.188014 0.616803 2.067810  
 1 -2.588238 2.297472 0.188154  
 1 -4.157867 1.549323 -0.195488  
 1 -2.915994 1.719110 -1.467971  
 1 -2.858811 -1.957678 -0.624688  
 1 -3.098732 -0.779973 -1.943622  
 1 -4.328824 -0.930798 -0.654603

**Structure S58. 13**

6 3.388079 -1.263472 -0.384036  
 6 3.960020 0.020009 -0.401911  
 6 2.025480 -1.405787 -0.103052  
 6 1.208397 -0.300642 0.144702  
 6 1.785284 1.020977 0.184416  
 6 3.181356 1.130107 -0.120496  
 1 3.999549 -2.144836 -0.591496  
 1 5.022988 0.143474 -0.625569  
 1 1.567858 -2.397188 -0.082369  
 6 -0.253806 -0.608909 0.375669  
 6 1.079507 2.181808 0.560539  
 1 3.636651 2.124124 -0.103891  
 8 -0.591481 -1.586534 1.035751  
 7 -1.137142 0.227228 -0.237878  
 6 -2.610182 0.095942 -0.218335  
 1 0.044749 2.152682 0.900348  
 1 -0.750840 0.924146 -0.864416  
 1 1.592402 3.146659 0.577904

6 -3.122869 0.180036 1.228918  
 6 -3.031588 -1.235158 -0.864896  
 6 -3.162529 1.272718 -1.033416  
 1 -2.710490 -0.638072 1.834031  
 1 -4.222222 0.113212 1.248145  
 1 -2.828565 1.136620 1.690035  
 1 -2.857100 2.238268 -0.597495  
 1 -4.262362 1.242498 -1.049579  
 1 -2.810452 1.236669 -2.078174  
 1 -2.623413 -2.083510 -0.299168  
 1 -2.660138 -1.296913 -1.900677  
 1 -4.129668 -1.321933 -0.887099

**Structure S59. <sup>2</sup>TS18**

6 4.044881 -2.258354 -0.118997  
 6 3.190752 -3.187617 -0.731299  
 6 3.744865 -0.895487 -0.176367  
 6 2.607919 -0.421879 -0.836627  
 6 1.764408 -1.353529 -1.528092  
 6 2.073476 -2.740701 -1.420795  
 1 4.935186 -2.598065 0.415897  
 1 3.409044 -4.257002 -0.677197  
 1 4.391235 -0.164618 0.312005  
 6 2.382035 1.075361 -0.744278  
 6 0.670372 -0.975895 -2.352147  
 1 1.422654 -3.459274 -1.925967  
 8 3.346480 1.830744 -0.648828  
 7 1.089682 1.488232 -0.739508  
 6 0.643829 2.892904 -0.616207  
 1 0.115771 -1.752514 -2.880141  
 1 0.560906 0.043731 -2.713870  
 6 1.296433 3.762502 -1.703576  
 6 0.991532 3.427747 0.783397  
 6 -0.876703 2.882251 -0.824031  
 1 2.385708 3.801110 -1.579662  
 1 0.896527 4.787682 -1.651772  
 1 1.075537 3.359603 -2.705483  
 1 -1.130568 2.540055 -1.839613  
 1 -1.285221 3.895825 -0.692926  
 1 -1.380492 2.211333 -0.112740  
 1 2.078076 3.391032 0.946338  
 1 0.503825 2.819945 1.560334  
 1 0.654928 4.471011 0.895166

1 0.364069 0.780459 -0.638297  
 6 1.297728 -1.648672 2.127185  
 6 1.584914 -0.598851 3.002378  
 6 0.063250 -1.685858 1.477685  
 6 -0.891175 -0.691841 1.717900  
 6 -0.626899 0.360096 2.619378  
 6 0.630178 0.393023 3.241143  
 1 2.038889 -2.425045 1.930809  
 1 2.556779 -0.549033 3.500076  
 1 -0.158417 -2.485144 0.768337  
 6 -2.255884 -0.789258 1.089502  
 6 -1.672347 1.405658 2.914315  
 1 0.860590 1.210883 3.929389  
 8 -3.220046 -1.190343 1.728134  
 7 -2.402940 -0.268684 -0.177817  
 6 -3.476959 -0.616831 -1.118894  
 1 -1.280249 2.195910 3.570771  
 1 -2.547533 0.952469 3.406932  
 6 -4.800253 -0.079823 -0.522458  
 6 -3.544300 -2.133462 -1.345304  
 6 -3.214500 0.123750 -2.440199  
 1 -5.074562 -0.615822 0.392785  
 1 -5.599380 -0.205027 -1.270394  
 1 -4.713030 0.992782 -0.288875  
 1 -3.123606 1.206768 -2.268671  
 1 -4.055420 -0.048144 -3.129169  
 1 -2.293023 -0.228971 -2.920478  
 1 -3.758647 -2.661464 -0.404706  
 1 -2.584660 -2.497961 -1.742111  
 1 -4.336546 -2.381087 -2.068811  
 1 -2.043236 1.882566 1.993152  
 9 -0.941014 -0.593939 -1.031772

**Structure S60. 14**

6 3.402690 -1.440905 -0.409112  
 6 3.961244 -0.170313 -0.248637  
 6 2.031190 -1.620784 -0.232407  
 6 1.190667 -0.542183 0.081502  
 6 1.755042 0.743265 0.264443  
 6 3.139283 0.904400 0.092921  
 1 4.036059 -2.293948 -0.665620  
 1 5.035378 -0.016889 -0.379347  
 1 1.582896 -2.611243 -0.330401

6 -0.277162 -0.886932 0.256077  
 6 0.943993 1.947614 0.663210  
 1 3.579055 1.894743 0.240645  
 8 -0.600899 -1.957423 0.762560  
 7 -1.162660 0.033604 -0.202276  
 6 -2.635476 -0.073563 -0.136491  
 1 1.595626 2.747911 1.045046  
 1 0.189991 1.703948 1.426656  
 6 -3.088592 -0.206719 1.327070  
 6 -3.114803 -1.280948 -0.959315  
 6 -3.184095 1.228513 -0.736055  
 1 -2.672687 -1.115455 1.782364  
 1 -4.187642 -0.257872 1.381707  
 1 -2.757517 0.663047 1.917589  
 1 -2.810619 2.107023 -0.184919  
 1 -4.283648 1.237001 -0.694253  
 1 -2.886439 1.337355 -1.792337  
 1 -2.702317 -2.212968 -0.549185  
 1 -2.789539 -1.188958 -2.008233  
 1 -4.214586 -1.345077 -0.943856  
 1 -0.792843 0.838085 -0.697469  
 9 0.253417 2.480976 -0.445797

**Structure S61. 4INT7**

27 -0.479724 0.275719 -0.749916  
 8 -2.261612 -0.328359 -0.900205  
 8 -0.801496 2.136194 -0.885871  
 7 0.078417 -1.652860 -1.330954  
 7 1.285235 0.653047 -1.807174  
 6 -2.854603 -1.486459 -0.909486  
 6 -4.239466 -1.578480 -0.535303  
 6 -4.846495 -2.828639 -0.633547  
 1 -5.898438 -2.936032 -0.368780  
 6 -4.160641 -3.986642 -1.054429  
 6 -2.816403 -3.909547 -1.362752  
 1 -2.259152 -4.803821 -1.656559  
 6 -2.138105 -2.672498 -1.278251  
 6 -0.714065 -2.659578 -1.505442  
 1 -0.293045 -3.626772 -1.814198  
 6 1.522826 -1.732030 -1.549533  
 1 1.984561 -1.543135 -0.563960  
 6 1.886425 -0.525754 -2.445131  
 1 1.349258 -0.673884 -3.401666

|   |           |           |           |                                        |           |           |           |
|---|-----------|-----------|-----------|----------------------------------------|-----------|-----------|-----------|
| 6 | 3.389465  | -0.454439 | -2.725016 | 6                                      | -1.846034 | 3.231649  | 1.755990  |
| 1 | 3.912740  | -0.205435 | -1.788155 | 1                                      | -1.153850 | 3.451840  | 2.585563  |
| 1 | 3.603367  | 0.351434  | -3.445255 | 1                                      | -1.578955 | 2.243872  | 1.360414  |
| 6 | 3.922504  | -1.784972 | -3.268467 | 1                                      | -2.863958 | 3.175003  | 2.175797  |
| 1 | 3.485395  | -1.980093 | -4.264621 | 9                                      | -0.146620 | 0.296291  | 1.066558  |
| 1 | 5.012332  | -1.710164 | -3.414373 | 1                                      | -4.691414 | -4.939330 | -1.114110 |
| 6 | 3.585768  | -2.945941 | -2.330296 | 1                                      | 2.519227  | 6.117969  | -0.301978 |
| 1 | 4.091117  | -2.793897 | -1.361130 | 6                                      | 5.346344  | -0.085073 | 0.415221  |
| 1 | 3.963935  | -3.896592 | -2.739154 | 6                                      | 4.969453  | 1.267940  | 0.484782  |
| 6 | 2.074134  | -3.045963 | -2.101555 | 6                                      | 4.539478  | -1.052636 | 1.021576  |
| 1 | 1.850746  | -3.866009 | -1.400584 | 6                                      | 3.362694  | -0.718252 | 1.699315  |
| 1 | 1.574400  | -3.285058 | -3.057517 | 6                                      | 3.003788  | 0.671390  | 1.849370  |
| 6 | 1.886891  | 1.798768  | -1.762179 | 6                                      | 3.830639  | 1.634045  | 1.182354  |
| 1 | 2.894050  | 1.886883  | -2.191316 | 1                                      | 6.253014  | -0.382264 | -0.117255 |
| 6 | 1.384004  | 3.010969  | -1.166528 | 1                                      | 5.581013  | 2.034359  | 0.000465  |
| 6 | 2.263949  | 4.110873  | -1.040610 | 1                                      | 4.812782  | -2.108736 | 0.972982  |
| 1 | 3.281852  | 4.026259  | -1.432280 | 6                                      | 2.570794  | -1.897391 | 2.233208  |
| 6 | 1.845046  | 5.265404  | -0.409247 | 6                                      | 1.944345  | 1.139051  | 2.648240  |
| 6 | 0.539993  | 5.333042  | 0.123457  | 1                                      | 3.554509  | 2.688557  | 1.259478  |
| 1 | 0.257238  | 6.247141  | 0.646035  | 8                                      | 3.165314  | -2.894005 | 2.646587  |
| 6 | -0.380669 | 4.293027  | 0.019071  | 7                                      | 1.221763  | -1.800936 | 2.148557  |
| 6 | 0.037238  | 3.110620  | -0.684613 | 6                                      | 0.262416  | -2.831084 | 2.601151  |
| 6 | -4.978106 | -0.333946 | -0.007529 | 1                                      | 1.335889  | 0.477982  | 3.260925  |
| 6 | -5.008218 | 0.773986  | -1.085418 | 1                                      | 0.806351  | -0.966757 | 1.718690  |
| 1 | -5.542310 | 0.428401  | -1.986111 | 1                                      | 1.707665  | 2.205093  | 2.665450  |
| 1 | -3.996551 | 1.078153  | -1.378790 | 6                                      | 0.458566  | -3.115312 | 4.099972  |
| 1 | -5.535954 | 1.662351  | -0.700618 | 6                                      | 0.449417  | -4.122163 | 1.784354  |
| 6 | -4.257198 | 0.181979  | 1.262038  | 6                                      | -1.145267 | -2.262917 | 2.362705  |
| 1 | -3.219794 | 0.471060  | 1.056423  | 1                                      | 1.466884  | -3.504518 | 4.294550  |
| 1 | -4.248728 | -0.591091 | 2.047852  | 1                                      | -0.279151 | -3.856015 | 4.448523  |
| 1 | -4.783575 | 1.064092  | 1.662510  | 1                                      | 0.320582  | -2.193228 | 4.687230  |
| 6 | -6.433774 | -0.653742 | 0.376138  | 1                                      | -1.310414 | -1.345905 | 2.948008  |
| 1 | -6.498116 | -1.410916 | 1.174018  | 1                                      | -1.906027 | -3.004030 | 2.650996  |
| 1 | -7.023554 | -1.007587 | -0.484841 | 1                                      | -1.298860 | -2.005061 | 1.307133  |
| 1 | -6.922330 | 0.258882  | 0.752526  | 1                                      | 1.469202  | -4.511777 | 1.907311  |
| 6 | -1.771307 | 4.342690  | 0.679613  | 1                                      | 0.272529  | -3.927604 | 0.715353  |
| 6 | -2.027881 | 5.691856  | 1.374760  | 1                                      | -0.266761 | -4.893283 | 2.110479  |
| 1 | -2.013555 | 6.534195  | 0.664144  | -----                                  |           |           |           |
| 1 | -1.295077 | 5.899392  | 2.170802  | <b>Structure S62. <sup>4</sup>TS19</b> |           |           |           |
| 1 | -3.023028 | 5.677092  | 1.846854  | -----                                  |           |           |           |
| 6 | -2.887114 | 4.140047  | -0.371331 | 27                                     | 0.437384  | -0.272984 | -0.731832 |
| 1 | -2.816453 | 3.157483  | -0.851204 | 8                                      | 2.276502  | 0.241002  | -0.779118 |
| 1 | -2.833977 | 4.914450  | -1.154681 | 8                                      | 0.704368  | -2.166048 | -0.920073 |
| 1 | -3.876010 | 4.217364  | 0.110346  | 7                                      | -0.012978 | 1.651368  | -1.356583 |

|   |           |           |           |   |           |           |           |
|---|-----------|-----------|-----------|---|-----------|-----------|-----------|
| 7 | -1.358621 | -0.594123 | -1.783974 | 1 | 4.289587  | 0.598254  | 2.120072  |
| 6 | 2.916967  | 1.365930  | -0.881174 | 1 | 4.767471  | -1.094793 | 1.839938  |
| 6 | 4.310008  | 1.426742  | -0.521259 | 6 | 6.470782  | 0.469399  | 0.440039  |
| 6 | 4.973282  | 2.636092  | -0.711165 | 1 | 6.572966  | 1.275499  | 1.184465  |
| 1 | 6.031566  | 2.711662  | -0.460203 | 1 | 7.070744  | 0.739465  | -0.444079 |
| 6 | 4.340335  | 3.794172  | -1.210606 | 1 | 6.922994  | -0.436139 | 0.874845  |
| 6 | 2.993544  | 3.754883  | -1.507041 | 6 | 1.590838  | -4.406360 | 0.643550  |
| 1 | 2.475704  | 4.650215  | -1.864360 | 6 | 1.791172  | -5.756563 | 1.354787  |
| 6 | 2.256587  | 2.558238  | -1.334964 | 1 | 1.741215  | -6.606341 | 0.654721  |
| 6 | 0.834028  | 2.609103  | -1.559411 | 1 | 1.050315  | -5.924377 | 2.153036  |
| 1 | 0.463237  | 3.588114  | -1.895365 | 1 | 2.786420  | -5.778427 | 1.826558  |
| 6 | -1.455099 | 1.806112  | -1.545245 | 6 | 2.709048  | -4.265779 | -0.415175 |
| 1 | -1.901852 | 1.656110  | -0.545817 | 1 | 2.669788  | -3.290030 | -0.911977 |
| 6 | -1.913904 | 0.610942  | -2.412794 | 1 | 2.622675  | -5.051534 | -1.184207 |
| 1 | -1.405507 | 0.722101  | -3.390225 | 1 | 3.697273  | -4.371322 | 0.062706  |
| 6 | -3.429170 | 0.620451  | -2.637581 | 6 | 1.723183  | -3.287118 | 1.705961  |
| 1 | -3.927065 | 0.399050  | -1.680104 | 1 | 1.020579  | -3.460077 | 2.538414  |
| 1 | -3.714033 | -0.175063 | -3.344335 | 1 | 1.512797  | -2.292873 | 1.294368  |
| 6 | -3.914447 | 1.973867  | -3.168740 | 1 | 2.742651  | -3.279120 | 2.126063  |
| 1 | -3.510609 | 2.138751  | -4.184131 | 9 | -0.028896 | -0.387973 | 1.083675  |
| 1 | -5.012060 | 1.956394  | -3.268350 | 1 | 4.914372  | 4.714200  | -1.341040 |
| 6 | -3.476402 | 3.122663  | -2.257845 | 1 | -2.748663 | -6.038945 | -0.372081 |
| 1 | -3.946991 | 3.005777  | -1.265696 | 6 | -5.330847 | 0.148612  | 0.542850  |
| 1 | -3.821906 | 4.088781  | -2.659420 | 6 | -4.925552 | -1.195993 | 0.561056  |
| 6 | -1.953178 | 3.142326  | -2.094017 | 6 | -4.518877 | 1.126206  | 1.127962  |
| 1 | -1.657034 | 3.956802  | -1.413823 | 6 | -3.305890 | 0.803782  | 1.740953  |
| 1 | -1.480563 | 3.343083  | -3.072289 | 6 | -2.913449 | -0.579731 | 1.833868  |
| 6 | -1.982068 | -1.726414 | -1.790402 | 6 | -3.742855 | -1.550602 | 1.189920  |
| 1 | -2.980725 | -1.786950 | -2.246353 | 1 | -6.268400 | 0.436013  | 0.060789  |
| 6 | -1.513127 | -2.961912 | -1.211020 | 1 | -5.544065 | -1.963963 | 0.089317  |
| 6 | -2.424749 | -4.036783 | -1.099046 | 1 | -4.814930 | 2.176875  | 1.108030  |
| 1 | -3.436336 | -3.920138 | -1.499779 | 6 | -2.495242 | 1.985658  | 2.244499  |
| 6 | -2.048229 | -5.206300 | -0.467905 | 6 | -1.794321 | -1.036894 | 2.555444  |
| 6 | -0.750300 | -5.315027 | 0.078090  | 1 | -3.436634 | -2.598377 | 1.226831  |
| 1 | -0.501082 | -6.239582 | 0.599653  | 8 | -3.072631 | 2.988708  | 2.663273  |
| 6 | 0.202411  | -4.304712 | -0.016237 | 7 | -1.151655 | 1.869501  | 2.126324  |
| 6 | -0.167149 | -3.103993 | -0.724634 | 6 | -0.157330 | 2.882495  | 2.537391  |
| 6 | 5.000577  | 0.187915  | 0.082795  | 1 | -1.235526 | -0.395734 | 3.232187  |
| 6 | 4.977283  | -0.984888 | -0.924096 | 1 | -0.767214 | 1.025142  | 1.688401  |
| 1 | 5.521264  | -0.719412 | -1.845794 | 1 | -1.522140 | -2.093143 | 2.523659  |
| 1 | 3.950877  | -1.259793 | -1.194395 | 6 | -0.319447 | 3.210355  | 4.030825  |
| 1 | 5.468279  | -1.870876 | -0.487846 | 6 | -0.322247 | 4.155641  | 1.689251  |
| 6 | 4.269482  | -0.222648 | 1.384230  | 6 | 1.223430  | 2.256591  | 2.288178  |
| 1 | 3.223023  | -0.490214 | 1.194517  | 1 | -1.309406 | 3.640981  | 4.232199  |

1 0.451111 3.931364 4.347485  
 1 -0.204777 2.299056 4.639637  
 1 1.372083 1.359240 2.907989  
 1 2.019673 2.978325 2.523847  
 1 1.339640 1.951503 1.240107  
 1 -1.333990 4.568124 1.807675  
 1 -0.152713 3.932583 0.625100  
 1 0.408994 4.920833 1.994667

---

**Structure S63. <sup>2</sup>INT18**

---

27 -0.166234 0.226737 -1.127789  
 8 -1.830422 -0.606029 -0.777873  
 8 -0.975379 1.905314 -0.789567  
 7 0.669631 -1.435337 -1.507839  
 7 1.488429 1.028512 -1.628872  
 6 -2.222501 -1.811219 -1.023277  
 6 -3.576898 -2.203076 -0.692246  
 6 -3.983338 -3.489800 -1.022901  
 1 -5.003720 -3.801670 -0.798217  
 6 -3.133945 -4.443201 -1.630542  
 6 -1.824627 -4.104749 -1.889549  
 1 -1.134746 -4.837584 -2.319698  
 6 -1.342857 -2.805058 -1.587855  
 6 0.059441 -2.554973 -1.754763  
 1 0.654907 -3.415591 -2.084565  
 6 2.127790 -1.286958 -1.569384  
 1 2.461874 -1.159651 -0.524552  
 6 2.388656 0.055958 -2.273383  
 1 2.034714 -0.060300 -3.316289  
 6 3.879392 0.398677 -2.295080  
 1 4.211170 0.599105 -1.263029  
 1 4.055589 1.316641 -2.877282  
 6 4.695080 -0.753127 -2.897385  
 1 4.437904 -0.861580 -3.966636  
 1 5.768173 -0.504937 -2.858882  
 6 4.427109 -2.078350 -2.178297  
 1 4.774993 -2.006716 -1.132281  
 1 5.003659 -2.892977 -2.645206  
 6 2.933515 -2.427813 -2.185433  
 1 2.764698 -3.357794 -1.619794  
 1 2.594200 -2.606399 -3.221456  
 6 1.791982 2.284737 -1.515540  
 1 2.782012 2.618586 -1.851166

6 0.953193 3.310249 -0.963374  
 6 1.524730 4.591262 -0.762684  
 1 2.563357 4.758832 -1.064198  
 6 0.793246 5.603049 -0.179462  
 6 -0.544995 5.351327 0.200220  
 1 -1.097357 6.171887 0.659067  
 6 -1.176982 4.127876 0.009169  
 6 -0.414872 3.052264 -0.593009  
 6 -4.497640 -1.218260 0.053632  
 6 -4.679821 0.081793 -0.761893  
 1 -5.116369 -0.136269 -1.751115  
 1 -3.722798 0.592284 -0.908972  
 1 -5.365932 0.767347 -0.237332  
 6 -3.868884 -0.895159 1.431072  
 1 -2.860298 -0.476734 1.328514  
 1 -3.806856 -1.806325 2.049255  
 1 -4.491057 -0.163596 1.973598  
 6 -5.895223 -1.811795 0.305443  
 1 -5.859421 -2.725164 0.920835  
 1 -6.420924 -2.050387 -0.633468  
 1 -6.512655 -1.078325 0.848389  
 6 -2.647917 3.896282 0.405686  
 6 -3.271431 5.135189 1.073354  
 1 -3.283399 6.011570 0.405528  
 1 -2.746850 5.417880 2.000690  
 1 -4.317461 4.918168 1.343047  
 6 -3.471350 3.584165 -0.865455  
 1 -3.078531 2.703721 -1.387410  
 1 -3.448523 4.439357 -1.561325  
 1 -4.524823 3.388752 -0.605074  
 6 -2.751920 2.722532 1.407947  
 1 -2.215836 2.965541 2.341575  
 1 -2.334161 1.800233 0.991425  
 1 -3.806367 2.540265 1.673004  
 9 -0.434848 0.215873 1.540876  
 1 -3.513670 -5.439882 -1.866089  
 1 1.231516 6.589471 -0.012213  
 6 4.422984 1.549170 1.362298  
 6 3.501309 2.588061 1.500544  
 6 4.021863 0.233920 1.598222  
 6 2.702479 -0.075997 1.962015  
 6 1.769259 0.981098 2.119071  
 6 2.189860 2.297885 1.878240  
 1 5.456150 1.760601 1.074975

|   |           |           |          |    |           |           |           |
|---|-----------|-----------|----------|----|-----------|-----------|-----------|
| 1 | 3.794334  | 3.623861  | 1.314973 | 1  | 2.903256  | 3.082396  | 1.561486  |
| 1 | 4.735265  | -0.587770 | 1.516302 | 6  | 0.038471  | -0.904209 | 4.811408  |
| 6 | 2.441730  | -1.551765 | 2.223648 | 6  | -0.109328 | -2.613289 | 2.937770  |
| 6 | 0.351203  | 0.780338  | 2.575374 | 6  | -1.348213 | -0.411255 | 2.788400  |
| 1 | 1.471523  | 3.113283  | 1.986365 | 1  | 0.901874  | -1.431298 | 5.233111  |
| 8 | 3.362707  | -2.266657 | 2.612364 | 1  | -0.877586 | -1.279823 | 5.292999  |
| 7 | 1.185270  | -2.007989 | 1.991701 | 1  | 0.131289  | 0.168072  | 5.043089  |
| 6 | 0.702340  | -3.378581 | 2.275039 | 1  | -1.329329 | 0.657007  | 3.048480  |
| 1 | 0.278453  | 0.092345  | 3.430422 | 1  | -2.226464 | -0.868258 | 3.266999  |
| 1 | 0.530661  | -1.398194 | 1.512150 | 1  | -1.464227 | -0.495525 | 1.702767  |
| 1 | -0.122375 | 1.737436  | 2.831054 | 1  | 0.781803  | -3.125033 | 3.328731  |
| 6 | 0.987354  | -3.750992 | 3.739122 | 1  | -0.146280 | -2.742327 | 1.847045  |
| 6 | 1.378855  | -4.377420 | 1.321235 | 1  | -1.003460 | -3.092783 | 3.364239  |
| 6 | -0.813657 | -3.356022 | 2.039408 | 27 | -0.546430 | -0.201133 | -1.303602 |
| 1 | 2.065461  | -3.774676 | 3.942360 | 8  | -0.510322 | 1.592496  | -0.763830 |
| 1 | 0.563239  | -4.742792 | 3.961564 | 8  | -2.250572 | -0.320381 | -0.545781 |
| 1 | 0.521057  | -3.020246 | 4.419757 | 7  | 1.261053  | -0.114544 | -1.908108 |
| 1 | -1.308928 | -2.640670 | 2.714507 | 7  | -0.144662 | -2.049458 | -0.876487 |
| 1 | -1.243602 | -4.352597 | 2.219334 | 6  | 0.368872  | 2.532100  | -0.962921 |
| 1 | -1.056960 | -3.073647 | 1.005627 | 6  | 0.098788  | 3.858114  | -0.469575 |
| 1 | 2.471053  | -4.341040 | 1.440431 | 6  | 1.053662  | 4.843392  | -0.707959 |
| 1 | 1.127295  | -4.141043 | 0.275969 | 1  | 0.871775  | 5.858917  | -0.355777 |
| 1 | 1.036666  | -5.403770 | 1.528262 | 6  | 2.264553  | 4.599018  | -1.388601 |

---

**Structure S64. <sup>3</sup>INT9**

---

|   |           |           |           |   |          |           |           |
|---|-----------|-----------|-----------|---|----------|-----------|-----------|
| 6 | 5.333951  | -0.934204 | 0.439498  | 6 | 1.609559 | 2.278573  | -1.631514 |
| 6 | 5.405440  | 0.382718  | -0.023310 | 6 | 1.984136 | 0.946879  | -2.024553 |
| 6 | 4.340010  | -1.279197 | 1.354362  | 1 | 2.996641 | 0.842858  | -2.433018 |
| 6 | 3.400990  | -0.330935 | 1.791849  | 6 | 1.701862 | -1.462908 | -2.278526 |
| 6 | 3.472441  | 1.009863  | 1.345027  | 1 | 1.077045 | -1.746156 | -3.143767 |
| 6 | 4.491367  | 1.334699  | 0.434116  | 6 | 1.273036 | -2.363035 | -1.101049 |
| 1 | 6.050037  | -1.684762 | 0.096455  | 1 | 1.819389 | -2.003543 | -0.210514 |
| 1 | 6.182212  | 0.674324  | -0.735270 | 6 | 1.622248 | -3.829492 | -1.347181 |
| 1 | 4.280545  | -2.296688 | 1.747036  | 1 | 1.014425 | -4.209745 | -2.187037 |
| 6 | 2.418712  | -0.827580 | 2.816402  | 1 | 1.372969 | -4.435227 | -0.461393 |
| 6 | 2.523637  | 2.082876  | 1.814784  | 6 | 3.113439 | -3.976208 | -1.676379 |
| 1 | 4.566319  | 2.366602  | 0.083007  | 1 | 3.711001 | -3.681829 | -0.795229 |
| 8 | 2.766618  | -1.496360 | 3.775100  | 1 | 3.345703 | -5.034472 | -1.876569 |
| 7 | 1.088868  | -0.465479 | 2.644688  | 6 | 3.511079 | -3.104845 | -2.871106 |
| 9 | 0.816312  | -0.222115 | 1.279352  | 1 | 2.977385 | -3.453851 | -3.772991 |
| 6 | -0.083932 | -1.120120 | 3.294329  | 1 | 4.587506 | -3.210927 | -3.081730 |
| 1 | 2.358898  | 2.037014  | 2.901921  | 6 | 3.179615 | -1.628326 | -2.621580 |
| 1 | 1.540588  | 1.970044  | 1.339644  | 1 | 3.429009 | -1.029620 | -3.512121 |
|   |           |           |           | 1 | 3.790676 | -1.249832 | -1.785663 |

|   |           |           |           |    |           |           |           |
|---|-----------|-----------|-----------|----|-----------|-----------|-----------|
| 6 | -1.047272 | -2.939408 | -0.603905 | 6  | 4.242112  | -1.101228 | 1.347981  |
| 1 | -0.733949 | -3.987812 | -0.514084 | 6  | 3.219452  | -0.221617 | 1.747561  |
| 6 | -2.442024 | -2.699883 | -0.381378 | 6  | 3.260133  | 1.139342  | 1.349035  |
| 6 | -3.279033 | -3.817435 | -0.131179 | 6  | 4.337784  | 1.543926  | 0.541794  |
| 1 | -2.840211 | -4.819418 | -0.131139 | 1  | 6.074985  | -1.378309 | 0.238001  |
| 6 | -4.623810 | -3.639990 | 0.105709  | 1  | 6.158579  | 1.019703  | -0.493943 |
| 6 | -5.163571 | -2.333793 | 0.091471  | 1  | 4.197791  | -2.135243 | 1.695880  |
| 1 | -6.234117 | -2.232123 | 0.271216  | 6  | 2.203765  | -0.823589 | 2.674240  |
| 6 | -4.402049 | -1.195189 | -0.144849 | 6  | 2.239669  | 2.168012  | 1.761789  |
| 6 | -2.990177 | -1.371556 | -0.381731 | 1  | 4.387132  | 2.589730  | 0.229701  |
| 6 | -1.201893 | 4.142215  | 0.305430  | 8  | 2.510414  | -1.744960 | 3.428044  |
| 6 | -1.249713 | 3.250832  | 1.569219  | 7  | 0.956084  | -0.236766 | 2.737915  |
| 1 | -0.415478 | 3.490899  | 2.249372  | 9  | 0.507164  | -0.199724 | 0.934645  |
| 1 | -1.188205 | 2.189252  | 1.306877  | 6  | -0.212351 | -0.837625 | 3.367572  |
| 1 | -2.190856 | 3.415959  | 2.119304  | 1  | 2.125774  | 2.206758  | 2.855719  |
| 6 | -2.425213 | 3.853377  | -0.595789 | 1  | 1.252681  | 1.918129  | 1.358963  |
| 1 | -2.454375 | 2.805202  | -0.914028 | 1  | 2.526524  | 3.166173  | 1.402145  |
| 1 | -2.403257 | 4.488150  | -1.496986 | 6  | 0.069027  | -0.790848 | 4.895354  |
| 1 | -3.358185 | 4.074352  | -0.051804 | 6  | -0.485001 | -2.271586 | 2.897864  |
| 6 | -1.290414 | 5.608395  | 0.763880  | 6  | -1.416712 | 0.066416  | 3.065695  |
| 1 | -1.297873 | 6.312178  | -0.084083 | 1  | 0.885702  | -1.469027 | 5.169908  |
| 1 | -0.461699 | 5.886557  | 1.434980  | 1  | -0.850584 | -1.094131 | 5.420178  |
| 1 | -2.227349 | 5.761126  | 1.322697  | 1  | 0.327968  | 0.229843  | 5.215876  |
| 6 | -5.009352 | 0.220096  | -0.171055 | 1  | -1.224651 | 1.096742  | 3.398852  |
| 6 | -6.528676 | 0.196816  | 0.073285  | 1  | -2.306098 | -0.312659 | 3.591706  |
| 1 | -6.786281 | -0.209102 | 1.065157  | 1  | -1.619216 | 0.073967  | 1.989821  |
| 1 | -7.065263 | -0.390140 | -0.689446 | 1  | 0.365152  | -2.932477 | 3.114178  |
| 1 | -6.922370 | 1.224747  | 0.028903  | 1  | -0.672498 | -2.264418 | 1.817985  |
| 6 | -4.370194 | 1.084374  | 0.941558  | 1  | -1.378731 | -2.672303 | 3.400068  |
| 1 | -3.290992 | 1.195694  | 0.794345  | 27 | -0.340920 | -0.309873 | -0.898004 |
| 1 | -4.543627 | 0.634150  | 1.933277  | 8  | -0.551428 | 1.556105  | -0.828357 |
| 1 | -4.821549 | 2.090096  | 0.947064  | 8  | -2.052155 | -0.476293 | -0.157325 |
| 6 | -4.766546 | 0.862714  | -1.558725 | 7  | 1.384201  | -0.190522 | -1.685720 |
| 1 | -5.309532 | 0.306551  | -2.340635 | 7  | -0.012065 | -2.188876 | -0.774524 |
| 1 | -3.703704 | 0.872983  | -1.830223 | 6  | 0.312609  | 2.495976  | -1.041379 |
| 1 | -5.136620 | 1.901375  | -1.566094 | 6  | -0.013363 | 3.855227  | -0.664830 |
| 9 | -1.111204 | -0.417337 | -3.047827 | 6  | 0.912945  | 4.847185  | -0.962212 |
| 1 | 2.973499  | 5.414221  | -1.548675 | 1  | 0.690016  | 5.880825  | -0.698049 |
| 1 | -5.275810 | -4.495166 | 0.296147  | 6  | 2.151663  | 4.591548  | -1.591180 |

-----  
**Structure S65. <sup>3</sup>TS20**  
 -----

|   |          |           |          |   |          |          |           |
|---|----------|-----------|----------|---|----------|----------|-----------|
| 6 | 5.295600 | -0.675604 | 0.542616 | 6 | 2.487628 | 3.295819 | -1.916847 |
| 6 | 5.339676 | 0.660609  | 0.135403 | 1 | 3.449752 | 3.069662 | -2.384526 |
|   |          |           |          | 6 | 1.593678 | 2.234237 | -1.637970 |
|   |          |           |          | 6 | 2.023293 | 0.902306 | -1.942088 |
|   |          |           |          | 1 | 2.999425 | 0.822862 | -2.435429 |

6 1.841507 -1.519770 -2.104314  
 1 1.231214 -1.779452 -2.987526  
 6 1.408062 -2.471938 -0.972263  
 1 1.922080 -2.133875 -0.056156  
 6 1.786818 -3.922372 -1.260381  
 1 1.212668 -4.284531 -2.131406  
 1 1.522032 -4.560941 -0.402604  
 6 3.288542 -4.027521 -1.554350  
 1 3.857910 -3.744507 -0.651305  
 1 3.549584 -5.074432 -1.777324  
 6 3.691685 -3.115599 -2.716451  
 1 3.184228 -3.452751 -3.638004  
 1 4.774082 -3.192963 -2.908134  
 6 3.326118 -1.652222 -2.438275  
 1 3.574074 -1.034243 -3.315537  
 1 3.918137 -1.274273 -1.590006  
 6 -0.931394 -3.085622 -0.639297  
 1 -0.634412 -4.142006 -0.658422  
 6 -2.329054 -2.834748 -0.447947  
 6 -3.207678 -3.944033 -0.412648  
 1 -2.795974 -4.951976 -0.516464  
 6 -4.563655 -3.749875 -0.259484  
 6 -5.071507 -2.434016 -0.185613  
 1 -6.153389 -2.317634 -0.121053  
 6 -4.265475 -1.301554 -0.217231  
 6 -2.837164 -1.499471 -0.281676  
 6 -1.331302 4.163476 0.067895  
 6 -1.372722 3.365886 1.392376  
 1 -0.556975 3.678853 2.064436  
 1 -1.275446 2.290465 1.213006  
 1 -2.327275 3.540591 1.915398  
 6 -2.530734 3.775703 -0.824605  
 1 -2.520259 2.708435 -1.064187  
 1 -2.513827 4.343569 -1.769599  
 1 -3.478004 4.006451 -0.310312  
 6 -1.465169 5.656992 0.412849  
 1 -1.483283 6.293655 -0.486414  
 1 -0.653783 6.010122 1.069617  
 1 -2.413579 5.823280 0.947791  
 6 -4.847856 0.121588 -0.290015  
 6 -6.386418 0.113664 -0.244539  
 1 -6.772590 -0.293856 0.704219  
 1 -6.828744 -0.461756 -1.073202  
 1 -6.759677 1.146306 -0.332363

6 -4.354754 0.997614 0.884025  
 1 -3.273155 1.151930 0.845702  
 1 -4.607297 0.534787 1.852396  
 1 -4.844506 1.984379 0.846631  
 6 -4.414761 0.735870 -1.644613  
 1 -4.865519 0.174632 -2.479433  
 1 -3.325103 0.712314 -1.779597  
 1 -4.755854 1.781322 -1.718213  
 9 -1.084619 -0.557885 -2.577753  
 1 2.834345 5.417262 -1.803051  
 1 -5.249827 -4.598957 -0.227498

---

**Structure S66. <sup>3</sup>INT10**

---

6 5.264279 -0.465276 0.650145  
 6 5.278053 0.924712 0.508934  
 6 4.192788 -1.068359 1.306369  
 6 3.131207 -0.314664 1.836963  
 6 3.142055 1.097169 1.705151  
 6 4.228257 1.682356 1.031641  
 1 6.081358 -1.074748 0.255491  
 1 6.106309 1.421679 -0.004046  
 1 4.157826 -2.152153 1.428361  
 6 2.046295 -1.122328 2.502791  
 6 2.033127 1.981905 2.203649  
 1 4.240123 2.768492 0.910648  
 8 2.027780 -2.355511 2.399970  
 7 1.216848 -0.508128 3.390374  
 9 0.439032 0.010667 0.619217  
 6 -0.180126 -0.824161 3.650849  
 1 1.878507 1.861285 3.286690  
 1 1.098828 1.697347 1.702112  
 1 2.246777 3.040448 1.994158  
 6 -0.247924 -1.298038 5.117848  
 6 -0.815858 -1.862161 2.712302  
 6 -0.946173 0.512269 3.495645  
 1 0.316760 -2.234704 5.245700  
 1 -1.295449 -1.482369 5.406401  
 1 0.177991 -0.542654 5.796017  
 1 -0.509241 1.303596 4.122817  
 1 -1.995133 0.365886 3.797063  
 1 -0.918185 0.822293 2.445035  
 1 -0.334292 -2.842953 2.811437  
 1 -0.718536 -1.518245 1.678195



1 -2.709029 3.117501 0.758776  
 6 -3.244471 0.527219 0.568408  
 1 -3.172581 -0.032600 1.517313  
 6 -3.244787 -0.525420 -0.567890  
 1 -3.173309 0.034333 -1.516871  
 6 -4.508000 -1.383859 -0.550718  
 1 -4.510649 -2.003605 0.363520  
 1 -4.513645 -2.070659 -1.412249  
 6 -5.761813 -0.501222 -0.576665  
 1 -5.804727 0.044003 -1.536488  
 1 -6.661570 -1.135816 -0.535069  
 6 -5.761377 0.503501 0.578762  
 1 -5.803689 -0.041697 1.538625  
 1 -6.661096 1.138190 0.537764  
 6 -4.507458 1.385947 0.551903  
 1 -4.512337 2.072876 1.413340  
 1 -4.510633 2.005541 -0.362443  
 6 -1.827764 -2.500568 -0.543394  
 1 -2.710221 -3.115253 -0.761942  
 6 -0.590915 -3.222658 -0.398402  
 6 -0.630947 -4.627356 -0.438940  
 1 -1.587330 -5.130503 -0.606912  
 6 0.526407 -5.367321 -0.253360  
 6 1.746495 -4.709846 0.015336  
 1 2.621597 -5.331197 0.205154  
 6 1.863050 -3.327633 0.064851  
 6 0.673330 -2.538071 -0.217005  
 6 3.165108 2.616904 -0.468320  
 6 2.889808 1.797038 -1.755492  
 1 2.664100 2.473135 -2.596569  
 1 2.039391 1.111694 -1.644025  
 1 3.781998 1.209750 -2.027119  
 6 3.656704 1.697953 0.674043  
 1 2.932204 0.909887 0.897774  
 1 3.831048 2.281439 1.593332  
 1 4.610530 1.224464 0.390941  
 6 4.292861 3.617038 -0.778756  
 1 4.571995 4.217597 0.102349  
 1 4.029801 4.304902 -1.598190  
 1 5.192125 3.065036 -1.094753  
 6 3.163086 -2.618957 0.469584  
 6 4.289958 -3.619965 0.780361  
 1 4.569650 -4.219974 -0.100946  
 1 4.025676 -4.308346 1.598969

1 5.189228 -3.068714 1.097652  
 6 3.656174 -1.699495 -0.671687  
 1 2.932054 -0.911173 -0.895662  
 1 3.831310 -2.282434 -1.591178  
 1 4.609825 -1.226409 -0.387315  
 6 2.887191 -1.799676 1.756978  
 1 2.660163 -2.476043 2.597488  
 1 2.037404 -1.113611 1.645108  
 1 3.779570 -1.213226 2.029818  
 9 -0.629087 -0.610668 1.727836  
 1 0.498706 6.458602 0.279906  
 1 0.495662 -6.458676 -0.285404  
 9 -0.627736 0.611542 -1.727022

---

**Structure S68. Co<sup>II</sup>(salen)**

---

27 0.000005 0.788728 0.000015  
 8 -1.307254 -0.553547 0.081346  
 8 1.307257 -0.553557 -0.081292  
 7 -1.272977 2.160343 -0.254193  
 7 1.272996 2.160340 0.254207  
 6 -2.600726 -0.470596 0.034242  
 6 -3.400842 -1.662762 0.207113  
 6 -4.781908 -1.541762 0.119931  
 1 -5.394460 -2.435370 0.239995  
 6 -5.464904 -0.319591 -0.116914  
 6 -4.697778 0.820116 -0.255745  
 1 -5.181733 1.787527 -0.426956  
 6 -3.280293 0.776726 -0.180090  
 6 -2.563239 2.013636 -0.312974  
 1 -3.185030 2.902024 -0.481801  
 6 -0.613824 3.460665 -0.463218  
 1 -0.226933 3.448715 -1.500163  
 6 0.613848 3.460664 0.463225  
 1 0.226957 3.448720 1.500170  
 6 1.465589 4.715847 0.274592  
 1 1.906141 4.704876 -0.738050  
 1 2.299941 4.724902 0.992999  
 6 0.609658 5.975537 0.463175  
 1 0.269405 6.027458 1.513110  
 1 1.225810 6.872197 0.287011  
 6 -0.609626 5.975537 -0.463176  
 1 -0.269373 6.027453 -1.513111  
 1 -1.225775 6.872200 -0.287016

6 -1.465561 4.715851 -0.274589  
1 -2.299913 4.724907 -0.992997  
1 -1.906113 4.704884 0.738053  
6 2.563258 2.013630 0.312969  
1 3.185054 2.902017 0.481782  
6 3.280305 0.776716 0.180084  
6 4.697792 0.820099 0.255716  
1 5.181755 1.787510 0.426912  
6 5.464910 -0.319614 0.116888  
6 4.781905 -1.541781 -0.119944  
1 5.394451 -2.435394 -0.240009  
6 3.400837 -1.662772 -0.207110  
6 2.600730 -0.470605 -0.034223  
6 -2.717560 -3.016917 0.486478  
6 -1.910511 -2.924849 1.803091  
1 -2.579412 -2.710063 2.653398  
1 -1.151467 -2.134524 1.749508  
1 -1.401975 -3.881697 2.008717  
6 -1.776394 -3.385874 -0.683591  
1 -0.991037 -2.632448 -0.811771  
1 -2.342022 -3.467280 -1.627047  
1 -1.296370 -4.360622 -0.494777  
6 -3.738698 -4.158094 0.645000  
1 -4.337333 -4.311295 -0.267346  
1 -4.431515 -3.983586 1.483874  
1 -3.206292 -5.100617 0.850449  
6 2.717530 -3.016914 -0.486468  
6 3.738638 -4.158120 -0.644993  
1 4.337300 -4.311311 0.267337  
1 4.431432 -3.983652 -1.483895  
1 3.206204 -5.100636 -0.850399  
6 1.776353 -3.385843 0.683600  
1 0.991033 -2.632382 0.811792  
1 2.341980 -3.467286 1.627053  
1 1.296283 -4.360567 0.494778  
6 1.910480 -2.924814 -1.803077  
1 2.579388 -2.710067 -2.653387  
1 1.151476 -2.134450 -1.749495  
1 1.401895 -3.881638 -2.008693  
6 6.984322 -0.283372 0.204216  
6 7.645550 -0.721413 -1.113107  
6 7.509235 -1.117420 1.384222  
1 7.271457 0.766972 0.387154  
1 7.304252 -0.102680 -1.958856

1 8.743695 -0.637647 -1.050847  
1 7.407716 -1.772128 -1.350251  
1 7.072182 -0.781497 2.338440  
1 7.262065 -2.185263 1.260502  
1 8.606498 -1.039351 1.465656  
6 -6.984314 -0.283342 -0.204258  
6 -7.645558 -0.721347 1.113069  
6 -7.509220 -1.117415 -1.384250  
1 -7.271440 0.767000 -0.387224  
1 -7.304271 -0.102592 1.958806  
1 -8.743703 -0.637583 1.050793  
1 -7.407728 -1.772056 1.350244  
1 -7.072149 -0.781522 -2.338470  
1 -7.262066 -2.185257 -1.260497  
1 -8.606482 -1.039334 -1.465702

-----  
**Structure S69. PhSO<sub>2</sub>N(Et)F**  
-----

16 -0.572181 -1.043987 -0.247160  
8 -0.886534 -1.190107 -1.673728  
8 -0.728769 -2.168106 0.672241  
6 1.042346 -0.308348 -0.060965  
6 1.697326 0.192752 -1.189576  
6 1.615486 -0.272696 1.215381  
6 2.966411 0.754597 -1.027895  
1 1.221739 0.138469 -2.170218  
6 2.882201 0.295005 1.358866  
1 1.080269 -0.683034 2.073551  
6 3.553780 0.806697 0.241042  
1 3.497220 1.150529 -1.896853  
1 3.348934 0.334371 2.345846  
1 4.546374 1.248169 0.360884  
7 -1.536096 0.270220 0.478822  
9 -2.783663 -0.355284 0.756882  
6 -1.827073 1.364415 -0.452283  
6 -2.621670 2.459607 0.243068  
1 -2.350325 0.976926 -1.343673  
1 -0.842298 1.741719 -0.773409  
1 -2.795805 3.292293 -0.455826  
1 -3.598673 2.080087 0.576843  
1 -2.077315 2.843804 1.119795

-----  
**Structure S70. <sup>2</sup>TS21**  
-----

|    |           |           |           |    |           |           |           |
|----|-----------|-----------|-----------|----|-----------|-----------|-----------|
| 27 | -0.730245 | -0.113845 | 0.967537  | 1  | -0.577880 | -3.052688 | -1.177569 |
| 8  | 0.060365  | -1.791594 | 0.648719  | 1  | -0.785133 | -4.739358 | -1.712023 |
| 8  | -2.224059 | -0.731463 | 0.018584  | 6  | -0.304528 | -4.771357 | 1.001410  |
| 7  | 0.669208  | 0.413759  | 2.133679  | 1  | -0.833867 | -3.856962 | 1.297964  |
| 7  | -1.585174 | 1.506329  | 1.445422  | 1  | 0.209152  | -5.178965 | 1.888063  |
| 6  | 1.294409  | -2.150580 | 0.809540  | 1  | -1.054020 | -5.511958 | 0.675926  |
| 6  | 1.732919  | -3.451709 | 0.353409  | 6  | 1.372857  | -5.831708 | -0.504251 |
| 6  | 3.092573  | -3.731652 | 0.409167  | 1  | 1.906250  | -6.280764 | 0.348967  |
| 1  | 3.444964  | -4.691752 | 0.032282  | 1  | 2.086272  | -5.726908 | -1.337500 |
| 6  | 4.071416  | -2.849392 | 0.939107  | 1  | 0.600484  | -6.549383 | -0.824004 |
| 6  | 3.627296  | -1.659480 | 1.482977  | 6  | -4.070874 | -2.284399 | -1.524447 |
| 1  | 4.337815  | -0.968839 | 1.947886  | 6  | -5.280200 | -2.903334 | -2.249241 |
| 6  | 2.257578  | -1.296939 | 1.447352  | 1  | -5.678566 | -2.244483 | -3.037536 |
| 6  | 1.862762  | -0.088903 | 2.118495  | 1  | -6.102230 | -3.143050 | -1.555449 |
| 1  | 2.653762  | 0.412618  | 2.686131  | 1  | -4.973814 | -3.844411 | -2.733746 |
| 6  | 0.305997  | 1.594630  | 2.932840  | 6  | -2.971622 | -2.025101 | -2.582437 |
| 1  | -0.305594 | 1.215991  | 3.774172  | 1  | -2.079991 | -1.572679 | -2.131143 |
| 6  | -0.623459 | 2.440537  | 2.046178  | 1  | -3.343429 | -1.345227 | -3.367155 |
| 1  | -0.013806 | 2.808167  | 1.205695  | 1  | -2.672576 | -2.969244 | -3.067413 |
| 6  | -1.183540 | 3.643151  | 2.803096  | 6  | -3.575725 | -3.312382 | -0.480058 |
| 1  | -1.834429 | 3.295568  | 3.625519  | 1  | -4.359847 | -3.511367 | 0.269842  |
| 1  | -1.802563 | 4.261545  | 2.134336  | 1  | -2.680572 | -2.951490 | 0.038359  |
| 6  | -0.029929 | 4.488342  | 3.360949  | 1  | -3.332146 | -4.268756 | -0.971554 |
| 1  | 0.543513  | 4.909748  | 2.516710  | 6  | -7.502979 | 1.345925  | -0.427891 |
| 1  | -0.434052 | 5.341484  | 3.929823  | 6  | -8.530397 | 0.385750  | 0.193296  |
| 6  | 0.907103  | 3.655599  | 4.240366  | 6  | -7.859091 | 1.661688  | -1.889969 |
| 1  | 0.358362  | 3.314420  | 5.136932  | 1  | -7.549878 | 2.293120  | 0.137634  |
| 1  | 1.744989  | 4.274295  | 4.600931  | 1  | -8.298891 | 0.180205  | 1.251013  |
| 6  | 1.455650  | 2.434998  | 3.489475  | 1  | -9.547528 | 0.809540  | 0.142916  |
| 1  | 2.078167  | 1.831408  | 4.168986  | 1  | -8.548618 | -0.580268 | -0.338994 |
| 1  | 2.095666  | 2.755192  | 2.650633  | 1  | -7.149313 | 2.382054  | -2.327855 |
| 6  | -2.824325 | 1.815518  | 1.222858  | 1  | -7.837192 | 0.750712  | -2.511614 |
| 1  | -3.193030 | 2.783660  | 1.584290  | 1  | -8.872363 | 2.091009  | -1.966693 |
| 6  | -3.783815 | 1.015686  | 0.513656  | 6  | 5.546402  | -3.222533 | 0.922577  |
| 6  | -5.107078 | 1.513672  | 0.396025  | 6  | 6.086890  | -3.321580 | -0.513858 |
| 1  | -5.347711 | 2.472356  | 0.867290  | 6  | 5.827412  | -4.514314 | 1.706885  |
| 6  | -6.080950 | 0.819540  | -0.295554 | 1  | 6.090124  | -2.404031 | 1.425817  |
| 6  | -5.703700 | -0.408824 | -0.897955 | 1  | 5.931496  | -2.380117 | -1.065539 |
| 1  | -6.473754 | -0.944672 | -1.453115 | 1  | 7.167531  | -3.542884 | -0.514966 |
| 6  | -4.428610 | -0.956887 | -0.827051 | 1  | 5.582500  | -4.125795 | -1.075860 |
| 6  | -3.419547 | -0.235314 | -0.085870 | 1  | 5.465857  | -4.438786 | 2.745216  |
| 6  | 0.705752  | -4.493459 | -0.137420 | 1  | 5.331899  | -5.383362 | 1.242414  |
| 6  | -0.048010 | -3.986922 | -1.386489 | 1  | 6.908891  | -4.728667 | 1.736779  |
| 1  | 0.648018  | -3.817963 | -2.223370 | 16 | 2.322076  | 2.605792  | -0.697348 |

|   |          |           |           |   |           |           |           |
|---|----------|-----------|-----------|---|-----------|-----------|-----------|
| 8 | 3.120466 | 2.004840  | 0.385716  | 6 | 0.730997  | -4.093310 | 1.861661  |
| 8 | 1.333068 | 3.642611  | -0.383993 | 1 | 1.474152  | -4.080258 | 2.679516  |
| 6 | 3.429634 | 3.223024  | -1.956716 | 1 | 1.177154  | -4.644522 | 1.018633  |
| 6 | 4.779861 | 2.861378  | -1.917145 | 6 | -0.549439 | -4.796300 | 2.333012  |
| 6 | 2.907922 | 4.050801  | -2.958419 | 1 | -1.250135 | -4.869801 | 1.483690  |
| 6 | 5.629947 | 3.345709  | -2.914632 | 1 | -0.313016 | -5.824943 | 2.650175  |
| 1 | 5.151626 | 2.219409  | -1.116780 | 6 | -1.217878 | -4.024077 | 3.474262  |
| 6 | 3.770552 | 4.523120  | -3.948444 | 1 | -0.545587 | -4.012098 | 4.351387  |
| 1 | 1.849588 | 4.317800  | -2.956808 | 1 | -2.142247 | -4.532959 | 3.792450  |
| 6 | 5.126341 | 4.171068  | -3.926547 | 6 | -1.547174 | -2.583960 | 3.060595  |
| 1 | 6.689313 | 3.078691  | -2.899270 | 1 | -1.977438 | -2.036199 | 3.914355  |
| 1 | 3.383863 | 5.170553  | -4.739037 | 1 | -2.297649 | -2.586615 | 2.255028  |
| 1 | 5.796203 | 4.545185  | -4.704907 | 6 | 2.721514  | -2.261175 | 0.778175  |
| 7 | 1.506274 | 1.415631  | -1.650807 | 1 | 2.931313  | -3.316762 | 0.991815  |
| 9 | 0.266061 | 0.980004  | -0.557682 | 6 | 3.823791  | -1.500172 | 0.265209  |
| 6 | 2.223728 | 0.163178  | -1.796206 | 6 | 5.085097  | -2.141938 | 0.167406  |
| 6 | 1.351217 | -0.876271 | -2.480323 | 1 | 5.171096  | -3.180173 | 0.503068  |
| 1 | 2.598965 | -0.202831 | -0.825398 | 6 | 6.187875  | -1.483886 | -0.340326 |
| 1 | 3.109008 | 0.398584  | -2.418898 | 6 | 6.005292  | -0.146847 | -0.777902 |
| 1 | 1.939752 | -1.786530 | -2.666083 | 1 | 6.875615  | 0.359291  | -1.194710 |
| 1 | 0.505092 | -1.133152 | -1.830709 | 6 | 4.800689  | 0.543853  | -0.716251 |
| 1 | 0.964610 | -0.501695 | -3.441020 | 6 | 3.658088  | -0.141866 | -0.161185 |

---

**Structure S71. <sup>4</sup>INT11**

---

|    |           |           |           |   |           |          |           |
|----|-----------|-----------|-----------|---|-----------|----------|-----------|
| 27 | 0.906743  | -0.041530 | 0.749942  | 6 | 0.032570  | 4.439701 | -0.084825 |
| 8  | 0.447752  | 1.766044  | 0.890903  | 6 | 0.689759  | 3.746449 | -1.299863 |
| 8  | 2.517098  | 0.479295  | -0.072625 | 1 | -0.045507 | 3.596515 | -2.106521 |
| 7  | -0.487722 | -0.524720 | 1.995945  | 1 | 1.104604  | 2.770429 | -1.027566 |
| 7  | 1.522714  | -1.823040 | 0.996394  | 1 | 1.503962  | 4.373082 | -1.699144 |
| 6  | -0.773368 | 2.223110  | 0.976675  | 6 | 1.087708  | 4.709392 | 1.013237  |
| 6  | -1.079632 | 3.544984  | 0.494075  | 1 | 1.525395  | 3.775432 | 1.386883  |
| 6  | -2.404412 | 3.967793  | 0.558946  | 1 | 0.633387  | 5.244438 | 1.863950  |
| 1  | -2.658111 | 4.951142  | 0.163839  | 1 | 1.902705  | 5.337236 | 0.616566  |
| 6  | -3.462803 | 3.198550  | 1.101976  | 6 | -0.505309 | 5.802753 | -0.556600 |
| 6  | -3.146459 | 1.955470  | 1.619018  | 1 | -0.963756 | 6.378314 | 0.263635  |
| 1  | -3.927315 | 1.324226  | 2.052456  | 1 | -1.250116 | 5.700850 | -1.362304 |
| 6  | -1.825416 | 1.454206  | 1.566318  | 1 | 0.326821  | 6.404892 | -0.955225 |
| 6  | -1.579521 | 0.151273  | 2.121761  | 6 | 4.660386  | 1.982576 | -1.250553 |
| 1  | -2.400935 | -0.278776 | 2.703281  | 6 | 5.999594  | 2.541906 | -1.764668 |
| 6  | -0.292044 | -1.870244 | 2.556155  | 1 | 6.404031  | 1.953649 | -2.603754 |
| 1  | 0.432639  | -1.770270 | 3.385900  | 1 | 6.764569  | 2.581851 | -0.972460 |
| 6  | 0.404192  | -2.665314 | 1.436574  | 1 | 5.849635  | 3.570492 | -2.129942 |
| 1  | -0.294552 | -2.687983 | 0.584867  | 6 | 3.666497  | 1.981363 | -2.436195 |
|    |           |           |           | 1 | 2.683762  | 1.594856 | -2.139332 |
|    |           |           |           | 1 | 4.049948  | 1.356045 | -3.259349 |
|    |           |           |           | 1 | 3.531415  | 3.004319 | -2.824844 |

|    |           |           |           |                                                 |           |           |           |
|----|-----------|-----------|-----------|-------------------------------------------------|-----------|-----------|-----------|
| 6  | 4.160352  | 2.923218  | -0.129837 | 1                                               | -2.049161 | 2.185996  | -2.777240 |
| 1  | 4.878582  | 2.945329  | 0.707070  | 1                                               | -0.751203 | 0.982435  | -2.501179 |
| 1  | 3.186172  | 2.603977  | 0.255145  | 1                                               | -1.907492 | 0.767748  | -3.857378 |
| 1  | 4.062404  | 3.952129  | -0.513347 | -----                                           |           |           |           |
| 6  | 7.547153  | -2.159099 | -0.452260 | <b>Structure S72. Co<sup>III</sup>(salen)-F</b> |           |           |           |
| 6  | 8.626157  | -1.416521 | 0.352513  | -----                                           |           |           |           |
| 6  | 7.974771  | -2.330122 | -1.919264 | 27                                              | -0.016061 | 0.720084  | 0.192167  |
| 1  | 7.442989  | -3.167964 | -0.016292 | 8                                               | 1.304276  | -0.536716 | -0.230764 |
| 1  | 8.337320  | -1.311766 | 1.410835  | 8                                               | -1.275220 | -0.625162 | -0.102407 |
| 1  | 9.586319  | -1.957693 | 0.313324  | 7                                               | 1.274617  | 2.126715  | 0.309177  |
| 1  | 8.800929  | -0.404273 | -0.049211 | 7                                               | -1.210502 | 2.094742  | -0.464610 |
| 1  | 7.223208  | -2.897676 | -2.491475 | 6                                               | 2.605102  | -0.466353 | -0.145217 |
| 1  | 8.103859  | -1.352662 | -2.413996 | 6                                               | 3.387219  | -1.659389 | -0.332005 |
| 1  | 8.935084  | -2.867960 | -1.990055 | 6                                               | 4.772106  | -1.546244 | -0.245076 |
| 6  | -4.892062 | 3.719726  | 1.092287  | 1                                               | 5.378504  | -2.442398 | -0.375277 |
| 6  | -5.423526 | 3.872611  | -0.342703 | 6                                               | 5.459897  | -0.334370 | 0.009985  |
| 6  | -5.037685 | 5.032763  | 1.877381  | 6                                               | 4.697672  | 0.806312  | 0.187866  |
| 1  | -5.513438 | 2.959535  | 1.596992  | 1                                               | 5.184468  | 1.765989  | 0.388308  |
| 1  | -5.355926 | 2.922284  | -0.896939 | 6                                               | 3.283702  | 0.763581  | 0.121248  |
| 1  | -6.479101 | 4.192511  | -0.340910 | 6                                               | 2.558734  | 1.995481  | 0.291722  |
| 1  | -4.847902 | 4.628539  | -0.903302 | 1                                               | 3.175336  | 2.895852  | 0.407417  |
| 1  | -4.684363 | 4.921055  | 2.915214  | 6                                               | 0.572164  | 3.406314  | 0.453414  |
| 1  | -4.456815 | 5.846494  | 1.411635  | 1                                               | 0.063457  | 3.351521  | 1.432157  |
| 1  | -6.091629 | 5.355994  | 1.908604  | 6                                               | -0.529753 | 3.391470  | -0.625198 |
| 16 | -3.063369 | -2.039808 | -0.728309 | 1                                               | -0.019531 | 3.370092  | -1.606175 |
| 8  | -3.445618 | -1.256917 | 0.464439  | 6                                               | -1.412394 | 4.637137  | -0.544768 |
| 8  | -2.148549 | -3.181901 | -0.577298 | 1                                               | -1.979859 | 4.609541  | 0.401988  |
| 6  | -4.564502 | -2.618719 | -1.514692 | 1                                               | -2.145197 | 4.641971  | -1.366770 |
| 6  | -5.775030 | -1.979467 | -1.226634 | 6                                               | -0.556500 | 5.909152  | -0.604932 |
| 6  | -4.484828 | -3.687516 | -2.415395 | 1                                               | -0.077393 | 5.978827  | -1.598031 |
| 6  | -6.936265 | -2.427885 | -1.860445 | 1                                               | -1.205997 | 6.793647  | -0.505718 |
| 1  | -5.801691 | -1.155009 | -0.512000 | 6                                               | 0.524050  | 5.914913  | 0.479990  |
| 6  | -5.654186 | -4.123302 | -3.040941 | 1                                               | 0.044309  | 5.940613  | 1.474467  |
| 1  | -3.524549 | -4.167692 | -2.612400 | 1                                               | 1.141904  | 6.823971  | 0.402500  |
| 6  | -6.874993 | -3.494486 | -2.765224 | 6                                               | 1.420675  | 4.673563  | 0.385739  |
| 1  | -7.892118 | -1.944144 | -1.645164 | 1                                               | 2.160161  | 4.678111  | 1.202111  |
| 1  | -5.613074 | -4.957390 | -3.745659 | 1                                               | 1.979788  | 4.688684  | -0.566789 |
| 1  | -7.786634 | -3.840199 | -3.259238 | 6                                               | -2.490570 | 1.936180  | -0.618578 |
| 7  | -2.480564 | -1.083249 | -2.008383 | 1                                               | -3.089877 | 2.806843  | -0.914589 |
| 9  | -0.241715 | -0.480085 | -0.705911 | 6                                               | -3.226549 | 0.723917  | -0.417379 |
| 6  | -2.691807 | 0.333993  | -1.869936 | 6                                               | -4.642398 | 0.774449  | -0.518293 |
| 6  | -1.794204 | 1.115683  | -2.818116 | 1                                               | -5.115378 | 1.730051  | -0.765831 |
| 1  | -2.551531 | 0.658449  | -0.826547 | 6                                               | -5.418967 | -0.345147 | -0.295704 |
| 1  | -3.764894 | 0.519135  | -2.106678 | 6                                               | -4.751447 | -1.548940 | 0.055892  |

1 -5.374879 -2.419391 0.261105  
 6 -3.373152 -1.675446 0.167493  
 6 -2.566569 -0.512843 -0.112149  
 6 2.690089 -3.011538 -0.583863  
 6 1.850411 -2.940768 -1.880988  
 1 2.498065 -2.744860 -2.752051  
 1 1.093812 -2.148653 -1.825130  
 1 1.335416 -3.900548 -2.053337  
 6 1.780320 -3.353425 0.620262  
 1 1.000232 -2.596748 0.764961  
 1 2.373145 -3.422931 1.547465  
 1 1.289860 -4.327928 0.461852  
 6 3.703414 -4.158865 -0.747599  
 1 4.319743 -4.302756 0.154248  
 1 4.379099 -3.997550 -1.602957  
 1 3.162951 -5.101507 -0.929041  
 6 -2.694618 -2.986638 0.607707  
 6 -3.721785 -4.093178 0.907606  
 1 -4.309100 -4.368640 0.016607  
 1 -4.423280 -3.805364 1.706998  
 1 -3.194420 -4.999784 1.245095  
 6 -1.764439 -3.505041 -0.513538  
 1 -0.966397 -2.788179 -0.734973  
 1 -2.337140 -3.687128 -1.438492  
 1 -1.300902 -4.458936 -0.212128  
 6 -1.887099 -2.730680 1.905198  
 1 -2.569021 -2.495051 2.739322  
 1 -1.183699 -1.894799 1.800025  
 1 -1.316768 -3.632885 2.182679  
 6 -6.936893 -0.304957 -0.399033  
 6 -7.611548 -0.621230 0.945849  
 6 -7.455676 -1.238060 -1.505497  
 1 -7.214166 0.727292 -0.675676  
 1 -7.271407 0.066063 1.737138  
 1 -8.708005 -0.533150 0.865532  
 1 -7.385868 -1.649241 1.275644  
 1 -7.007258 -0.992805 -2.481758  
 1 -7.217873 -2.292087 -1.283741  
 1 -8.551303 -1.160194 -1.604661  
 6 6.979686 -0.304781 0.089741  
 6 7.630865 -0.724856 -1.238152  
 6 7.505622 -1.159774 1.254143  
 1 7.271168 0.741399 0.287884  
 1 7.287957 -0.091643 -2.072431

1 8.729407 -0.646143 -1.179831  
 1 7.387872 -1.770974 -1.489741  
 1 7.073508 -0.838185 2.215380  
 1 7.254975 -2.224640 1.113586  
 1 8.603267 -1.085628 1.331863  
 9 -0.306617 0.805905 2.027595

-----  
**Structure S73. PhSO<sub>2</sub>N(Et)**  
 -----

16 0.683615 -0.752451 -0.261487  
 8 0.930406 -1.839022 0.699279  
 8 0.953908 -0.961257 -1.693984  
 6 -0.992933 -0.172055 -0.063023  
 6 -1.641215 -0.383266 1.157384  
 6 -1.613064 0.481217 -1.132122  
 6 -2.949027 0.083974 1.308637  
 1 -1.131297 -0.909068 1.966558  
 6 -2.920901 0.942087 -0.964979  
 1 -1.082067 0.616410 -2.076015  
 6 -3.585110 0.745179 0.251563  
 1 -3.473863 -0.072929 2.254099  
 1 -3.424094 1.452825 -1.789470  
 1 -4.609164 1.106708 0.375205  
 7 1.571037 0.616078 0.207992  
 6 2.992806 0.373127 0.276199  
 6 3.762292 1.669520 0.480620  
 1 3.334649 -0.160528 -0.634413  
 1 3.179281 -0.338718 1.108480  
 1 4.841515 1.463012 0.555319  
 1 3.598903 2.357047 -0.364033  
 1 3.439423 2.175449 1.404075

-----  
**Structure S74. [Co<sup>IV</sup>(salen)-F]<sup>+</sup>**  
 -----

27 0.014941 0.742034 0.212403  
 8 1.287023 -0.507508 -0.253458  
 8 -1.288660 -0.626380 -0.056077  
 7 1.277296 2.133164 0.339814  
 7 -1.192437 2.122087 -0.515269  
 6 2.591960 -0.460591 -0.149976  
 6 3.353143 -1.665106 -0.329184  
 6 4.738255 -1.564443 -0.231831  
 1 5.336963 -2.465312 -0.360650  
 6 5.436896 -0.360325 0.031139

|   |           |           |           |                                                         |           |           |           |
|---|-----------|-----------|-----------|---------------------------------------------------------|-----------|-----------|-----------|
| 6 | 4.690055  | 0.792349  | 0.206449  | 6                                                       | -2.692729 | -3.028815 | 0.550724  |
| 1 | 5.186927  | 1.744055  | 0.415080  | 6                                                       | -3.726177 | -4.141048 | 0.800658  |
| 6 | 3.278677  | 0.763762  | 0.127852  | 1                                                       | -4.312365 | -4.374124 | -0.102318 |
| 6 | 2.563070  | 1.996006  | 0.303277  | 1                                                       | -4.423420 | -3.885237 | 1.613655  |
| 1 | 3.180031  | 2.896320  | 0.407797  | 1                                                       | -3.200161 | -5.061000 | 1.097852  |
| 6 | 0.575121  | 3.419546  | 0.459787  | 6                                                       | -1.756678 | -3.500130 | -0.589823 |
| 1 | 0.045415  | 3.380365  | 1.427106  | 1                                                       | -0.939541 | -2.794660 | -0.770858 |
| 6 | -0.500725 | 3.415059  | -0.651288 | 1                                                       | -2.321741 | -3.632682 | -1.526814 |
| 1 | 0.036144  | 3.374541  | -1.616183 | 1                                                       | -1.316428 | -4.473275 | -0.321944 |
| 6 | -1.373089 | 4.666416  | -0.599060 | 6                                                       | -1.894609 | -2.819035 | 1.864696  |
| 1 | -1.957521 | 4.654874  | 0.337717  | 1                                                       | -2.578216 | -2.578151 | 2.694908  |
| 1 | -2.089646 | 4.667912  | -1.435871 | 1                                                       | -1.156576 | -2.010882 | 1.788289  |
| 6 | -0.499528 | 5.926458  | -0.654164 | 1                                                       | -1.364619 | -3.749127 | 2.123915  |
| 1 | 0.001503  | 5.979424  | -1.636999 | 6                                                       | -6.891146 | -0.276825 | -0.347943 |
| 1 | -1.140473 | 6.818758  | -0.577483 | 6                                                       | -7.555254 | -0.631415 | 0.995603  |
| 6 | 0.555128  | 5.928307  | 0.455559  | 6                                                       | -7.419116 | -1.174065 | -1.482946 |
| 1 | 0.054226  | 5.971582  | 1.438652  | 1                                                       | -7.151964 | 0.766276  | -0.590700 |
| 1 | 1.188082  | 6.826616  | 0.382250  | 1                                                       | -7.194452 | 0.018186  | 1.808478  |
| 6 | 1.439471  | 4.676368  | 0.394822  | 1                                                       | -8.647045 | -0.507083 | 0.917437  |
| 1 | 2.159539  | 4.679528  | 1.228125  | 1                                                       | -7.356612 | -1.677547 | 1.279790  |
| 1 | 2.018050  | 4.672176  | -0.545770 | 1                                                       | -6.969297 | -0.906885 | -2.452052 |
| 6 | -2.469017 | 1.982913  | -0.591014 | 1                                                       | -7.204270 | -2.237193 | -1.287752 |
| 1 | -3.089826 | 2.855774  | -0.829649 | 1                                                       | -8.511573 | -1.063082 | -1.570830 |
| 6 | -3.206680 | 0.749633  | -0.374949 | 6                                                       | 6.954494  | -0.350332 | 0.122650  |
| 6 | -4.591450 | 0.796995  | -0.462616 | 6                                                       | 7.606150  | -0.777227 | -1.202781 |
| 1 | -5.082082 | 1.745815  | -0.695864 | 6                                                       | 7.455763  | -1.216680 | 1.289576  |
| 6 | -5.384771 | -0.351722 | -0.251708 | 1                                                       | 7.257297  | 0.691115  | 0.325634  |
| 6 | -4.742316 | -1.573711 | 0.060522  | 1                                                       | 7.276969  | -0.138344 | -2.038151 |
| 1 | -5.377598 | -2.439118 | 0.241488  | 1                                                       | 8.704479  | -0.710631 | -1.135217 |
| 6 | -3.366981 | -1.711074 | 0.157580  | 1                                                       | 7.353463  | -1.820389 | -1.456274 |
| 6 | -2.550642 | -0.519521 | -0.086995 | 1                                                       | 7.020848  | -0.891088 | 2.248085  |
| 6 | 2.646846  | -3.009177 | -0.591325 | 1                                                       | 7.192663  | -2.277596 | 1.143196  |
| 6 | 1.821481  | -2.927944 | -1.896999 | 1                                                       | 8.553166  | -1.156346 | 1.375221  |
| 1 | 2.478957  | -2.726589 | -2.758909 | 9                                                       | -0.448282 | 0.841501  | 1.985136  |
| 1 | 1.061716  | -2.138118 | -1.850297 | -----                                                   |           |           |           |
| 1 | 1.310622  | -3.887288 | -2.080741 | <b>Structure S75. PhSO<sub>2</sub>N<sup>-</sup>(Et)</b> |           |           |           |
| 6 | 1.728940  | -3.346141 | 0.607615  | -----                                                   |           |           |           |
| 1 | 0.952095  | -2.586713 | 0.753904  | 16                                                      | -0.733145 | -0.743890 | 0.230306  |
| 1 | 2.316953  | -3.423295 | 1.536797  | 8                                                       | -0.791406 | -2.005097 | -0.577017 |
| 1 | 1.232575  | -4.316034 | 0.443285  | 8                                                       | -0.872224 | -0.999862 | 1.700123  |
| 6 | 3.653995  | -4.162379 | -0.750575 | 6                                                       | 0.946272  | -0.091422 | 0.010548  |
| 1 | 4.262080  | -4.313160 | 0.155355  | 6                                                       | 1.920887  | -0.904279 | -0.571849 |
| 1 | 4.335970  | -4.003176 | -1.600933 | 6                                                       | 1.279888  | 1.175358  | 0.505290  |
| 1 | 3.107700  | -5.099916 | -0.938402 | 6                                                       | 3.240435  | -0.446061 | -0.667307 |

1 1.624835 -1.885314 -0.949092  
6 2.596833 1.630210 0.405098  
1 0.498695 1.796369 0.948323  
6 3.580301 0.820026 -0.179771  
1 4.004239 -1.079909 -1.127146  
1 2.859776 2.622159 0.783802  
1 4.610739 1.178456 -0.255755  
7 -1.585272 0.466962 -0.325744  
6 -3.020725 0.327421 -0.151391  
6 -3.718079 1.596706 -0.634371  
1 -3.309071 0.147504 0.909942  
1 -3.442921 -0.538806 -0.713972  
1 -4.814011 1.531739 -0.518653  
1 -3.359249 2.471985 -0.065946  
1 -3.491633 1.781230 -1.698509

---

**Structure S76. 16**

---

6 -1.786535 -1.045916 0.000005  
6 -0.409847 -1.286937 0.000003  
6 0.516752 -0.225320 -0.000013  
6 0.013041 1.092505 -0.000006  
6 -1.360469 1.333991 0.000000  
6 -2.268371 0.266383 0.000001  
1 -2.485376 -1.886835 0.000015  
1 -0.040805 -2.316762 0.000009  
1 0.703211 1.939196 -0.000002  
1 -1.728343 2.363718 0.000005  
1 -3.344411 0.459525 0.000003  
6 1.959150 -0.534177 -0.000008  
6 2.978712 0.338744 0.000011  
1 2.196694 -1.605065 -0.000022  
1 4.014549 -0.012449 0.000013  
1 2.829888 1.423040 0.000024

---

**Structure S77. <sup>2</sup>TS22**

---

6 4.670228 -0.928497 -1.336776  
6 3.329121 -1.139229 -1.023251  
6 2.850728 -0.929809 0.292059  
6 3.775696 -0.510537 1.275337  
6 5.117784 -0.301071 0.959163  
6 5.571425 -0.506997 -0.349120  
1 5.019057 -1.094063 -2.359588

1 2.643928 -1.470558 -1.806221  
1 3.424347 -0.341050 2.297008  
1 5.814202 0.027311 1.735144  
1 6.622514 -0.341625 -0.599569  
6 1.453791 -1.108918 0.666810  
6 0.417815 -1.408804 -0.171958  
1 1.212382 -0.916236 1.716578  
1 0.573800 -1.669839 -1.219721  
1 -0.564050 -1.646555 0.237816  
7 -0.359562 0.642896 -0.854560  
16 -1.424070 1.156931 0.331672  
6 0.752727 1.537509 -1.158267  
8 -1.887662 2.504595 -0.061107  
8 -0.913871 0.966275 1.702841  
6 -2.780565 0.007854 0.081243  
6 1.416042 2.316532 -0.022835  
1 0.377194 2.247332 -1.922418  
1 1.497469 0.911957 -1.677623  
6 -3.432928 -0.012894 -1.156431  
6 -3.187987 -0.804073 1.141148  
1 2.273156 2.883452 -0.420035  
1 0.715016 3.030390 0.433542  
1 1.783339 1.644668 0.764609  
6 -4.509255 -0.883219 -1.334348  
1 -3.096948 0.636992 -1.966685  
6 -4.271033 -1.669208 0.951113  
1 -2.659814 -0.755860 2.094889  
6 -4.927424 -1.709871 -0.282696  
1 -5.026288 -0.916083 -2.296554  
1 -4.600504 -2.312040 1.771160  
1 -5.771470 -2.388946 -0.428180

---

**Structure S78. 17**

---

6 -4.779001 1.248467 -1.283486  
6 -3.426957 1.022923 -1.050533  
6 -2.960936 0.586279 0.228978  
6 -3.948576 0.393629 1.246927  
6 -5.295955 0.622053 1.001267  
6 -5.726187 1.052850 -0.265395  
1 -5.106218 1.581207 -2.272609  
1 -2.714567 1.180628 -1.862613  
1 -3.622628 0.057710 2.235366  
1 -6.026197 0.465022 1.800060

|    |           |           |           |    |           |           |           |
|----|-----------|-----------|-----------|----|-----------|-----------|-----------|
| 1  | -6.787048 | 1.232565  | -0.456941 | 1  | 0.122925  | 5.061230  | -0.653706 |
| 6  | -1.598903 | 0.334150  | 0.525479  | 1  | 0.320904  | 2.862757  | -2.633142 |
| 6  | -0.439821 | 0.474435  | -0.412787 | 1  | -0.226628 | 2.158316  | -1.142269 |
| 1  | -1.344535 | -0.019608 | 1.528417  | 7  | -1.538460 | 3.580907  | -2.022764 |
| 1  | -0.751185 | 0.806770  | -1.413526 | 16 | -2.815636 | 3.095377  | -1.081008 |
| 1  | 0.249468  | 1.254762  | -0.041769 | 6  | -1.802127 | 4.094921  | -3.370191 |
| 7  | 0.352859  | -0.755230 | -0.600569 | 8  | -3.906508 | 4.061515  | -1.267996 |
| 16 | 1.544075  | -1.059392 | 0.538032  | 8  | -2.265681 | 2.863344  | 0.263927  |
| 6  | -0.251938 | -1.904342 | -1.294413 | 6  | -3.378344 | 1.514098  | -1.728346 |
| 8  | 2.101417  | -2.380869 | 0.215504  | 6  | -1.172447 | 5.464742  | -3.597367 |
| 8  | 1.056439  | -0.790993 | 1.902247  | 1  | -2.890775 | 4.162895  | -3.503086 |
| 6  | 2.776945  | 0.191611  | 0.158679  | 1  | -1.428119 | 3.367328  | -4.113789 |
| 6  | -1.127837 | -2.811285 | -0.432655 | 6  | -2.532519 | 0.399437  | -1.658256 |
| 1  | 0.561415  | -2.490593 | -1.746165 | 6  | -4.654623 | 1.433470  | -2.295405 |
| 1  | -0.837542 | -1.474719 | -2.123155 | 1  | -1.385635 | 5.816560  | -4.619969 |
| 6  | 3.437325  | 0.131027  | -1.073992 | 1  | -1.579815 | 6.197245  | -2.882391 |
| 6  | 3.074881  | 1.173428  | 1.105624  | 1  | -0.078186 | 5.432117  | -3.472596 |
| 1  | -1.521543 | -3.642341 | -1.040967 | 6  | -2.985566 | -0.813522 | -2.180938 |
| 1  | -0.540361 | -3.243805 | 0.391933  | 1  | -1.533963 | 0.445787  | -1.215758 |
| 1  | -1.982463 | -2.266647 | -0.004404 | 6  | -5.093763 | 0.208329  | -2.806051 |
| 6  | 4.412743  | 1.086327  | -1.361468 | 1  | -5.290545 | 2.319276  | -2.328102 |
| 1  | 3.189971  | -0.650180 | -1.795592 | 6  | -4.260593 | -0.914034 | -2.748155 |
| 6  | 4.055284  | 2.125167  | 0.804666  | 1  | -2.335230 | -1.687038 | -2.125737 |
| 1  | 2.544480  | 1.185735  | 2.059030  | 1  | -6.091130 | 0.132506  | -3.246177 |
| 6  | 4.720582  | 2.082051  | -0.424143 | 1  | -4.608310 | -1.873170 | -3.140289 |
| 1  | 4.937366  | 1.053998  | -2.319528 | 27 | 0.510332  | -0.662475 | 0.958381  |
| 1  | 4.297975  | 2.901063  | 1.534865  | 8  | -0.817704 | -1.973564 | 0.888282  |
| 1  | 5.485662  | 2.827594  | -0.655433 | 8  | 1.708015  | -1.963116 | 0.348491  |

-----  
**Structure S79. <sup>4</sup>INT12**  
 -----

|   |           |          |           |   |           |           |          |
|---|-----------|----------|-----------|---|-----------|-----------|----------|
| 6 | 3.976946  | 2.523055 | -0.421872 | 7 | -0.676327 | 0.599869  | 1.759125 |
| 6 | 2.637561  | 2.672626 | -0.767966 | 7 | 1.899037  | 0.291435  | 1.888740 |
| 6 | 1.955933  | 3.905836 | -0.523182 | 6 | -2.112438 | -1.880187 | 1.043165 |
| 6 | 2.689567  | 4.944766 | 0.129232  | 6 | -2.940610 | -3.020113 | 0.755793 |
| 6 | 4.022618  | 4.774102 | 0.481239  | 6 | -4.319254 | -2.860282 | 0.872004 |
| 6 | 4.683099  | 3.565393 | 0.198990  | 1 | -4.965114 | -3.703225 | 0.626919 |
| 1 | 4.476293  | 1.572396 | -0.622354 | 6 | -4.952308 | -1.662533 | 1.283584 |
| 1 | 2.092746  | 1.821139 | -1.181087 | 6 | -4.140430 | -0.589528 | 1.605718 |
| 1 | 2.184477  | 5.891187 | 0.342308  | 1 | -4.582449 | 0.354858  | 1.937223 |
| 1 | 4.560624  | 5.586936 | 0.977156  | 6 | -2.733228 | -0.676383 | 1.496672 |
| 1 | 5.734294  | 3.435158 | 0.469065  | 6 | -1.956221 | 0.474656  | 1.871441 |
| 6 | 0.608894  | 4.115942 | -0.909403 | 1 | -2.521205 | 1.314283  | 2.287163 |
| 6 | -0.190467 | 3.117403 | -1.685509 | 6 | 0.061239  | 1.810770  | 2.140996 |
|   |           |          |           | 1 | 0.336105  | 2.301488  | 1.192945 |
|   |           |          |           | 6 | 1.358952  | 1.318200  | 2.799600 |
|   |           |          |           | 1 | 1.074466  | 0.798945  | 3.734110 |



|    |           |           |           |   |           |           |           |
|----|-----------|-----------|-----------|---|-----------|-----------|-----------|
| 7  | -1.497786 | 4.036887  | -1.482798 | 6 | 0.729160  | 2.493243  | 5.287831  |
| 16 | -2.592194 | 3.400157  | -0.374949 | 1 | 0.441219  | 1.777542  | 6.079317  |
| 6  | -1.953511 | 5.111936  | -2.379992 | 1 | 1.300070  | 3.295951  | 5.782967  |
| 8  | -3.559502 | 4.460857  | -0.065991 | 6 | -0.534908 | 3.057218  | 4.633996  |
| 8  | -1.800032 | 2.800078  | 0.706184  | 1 | -0.254281 | 3.840264  | 3.906647  |
| 6  | -3.453542 | 2.066092  | -1.206699 | 1 | -1.175590 | 3.542307  | 5.388441  |
| 6  | -0.942836 | 6.251864  | -2.437211 | 6 | -1.321017 | 1.960779  | 3.907877  |
| 1  | -2.908190 | 5.491692  | -1.996388 | 1 | -2.187515 | 2.397652  | 3.388566  |
| 1  | -2.144819 | 4.702487  | -3.389465 | 1 | -1.702598 | 1.226604  | 4.640262  |
| 6  | -2.854617 | 0.801485  | -1.268177 | 6 | 2.879266  | -0.160921 | 2.488909  |
| 6  | -4.691702 | 2.328082  | -1.805926 | 1 | 3.432346  | 0.221766  | 3.359803  |
| 1  | -1.304700 | 7.044978  | -3.111635 | 6 | 3.706205  | -0.773824 | 1.479494  |
| 1  | -0.796493 | 6.683676  | -1.434452 | 6 | 5.111780  | -0.639611 | 1.605079  |
| 1  | 0.037738  | 5.915488  | -2.811332 | 1 | 5.512992  | -0.149676 | 2.498666  |
| 6  | -3.515412 | -0.215403 | -1.962588 | 6 | 5.971319  | -1.073668 | 0.611741  |
| 1  | -1.890958 | 0.615487  | -0.791087 | 6 | 5.394592  | -1.649441 | -0.550797 |
| 6  | -5.340305 | 1.296734  | -2.488943 | 1 | 6.076391  | -1.944877 | -1.348671 |
| 1  | -5.141043 | 3.319092  | -1.722267 | 6 | 4.030348  | -1.843202 | -0.728530 |
| 6  | -4.750711 | 0.028638  | -2.569915 | 6 | 3.146669  | -1.442852 | 0.338212  |
| 1  | -3.062576 | -1.205961 | -2.009516 | 6 | -2.030027 | -4.228708 | -0.888066 |
| 1  | -6.311963 | 1.482025  | -2.953766 | 6 | -1.037249 | -5.001414 | 0.012271  |
| 1  | -5.262857 | -0.777568 | -3.100450 | 1 | -1.573334 | -5.547838 | 0.806403  |
| 27 | 0.383217  | -0.615842 | 0.852267  | 1 | -0.317412 | -4.320794 | 0.483441  |
| 8  | -0.837499 | -2.107185 | 0.608507  | 1 | -0.477083 | -5.740235 | -0.585413 |
| 8  | 1.880631  | -1.694549 | 0.258876  | 6 | -1.253108 | -3.490196 | -2.005106 |
| 7  | -1.031279 | 0.168315  | 2.120638  | 1 | -0.598053 | -2.711015 | -1.596289 |
| 7  | 1.596119  | 0.015635  | 2.431502  | 1 | -1.948444 | -3.025975 | -2.723967 |
| 6  | -2.132213 | -2.169624 | 0.669460  | 1 | -0.626701 | -4.203091 | -2.566840 |
| 6  | -2.828331 | -3.214560 | -0.041888 | 6 | -2.948296 | -5.262462 | -1.564957 |
| 6  | -4.215954 | -3.253774 | 0.050876  | 1 | -3.671638 | -4.791762 | -2.250209 |
| 1  | -4.757271 | -4.031536 | -0.488007 | 1 | -3.511637 | -5.861925 | -0.831764 |
| 6  | -4.987252 | -2.332992 | 0.802901  | 1 | -2.338900 | -5.959680 | -2.162123 |
| 6  | -4.309707 | -1.335155 | 1.483886  | 6 | 3.432297  | -2.418267 | -2.027252 |
| 1  | -4.869580 | -0.597842 | 2.068463  | 6 | 4.521018  | -2.728264 | -3.070300 |
| 6  | -2.901568 | -1.225972 | 1.431817  | 1 | 5.231775  | -3.493079 | -2.717312 |
| 6  | -2.282672 | -0.139330 | 2.158901  | 1 | 5.093958  | -1.829256 | -3.349271 |
| 1  | -2.969952 | 0.457530  | 2.775944  | 1 | 4.051138  | -3.115202 | -3.988847 |
| 6  | -0.433191 | 1.253999  | 2.887187  | 6 | 2.671323  | -3.732664 | -1.733484 |
| 1  | -0.116682 | 1.999606  | 2.138626  | 1 | 1.836380  | -3.564498 | -1.042596 |
| 6  | 0.858694  | 0.685513  | 3.516999  | 1 | 3.346201  | -4.483918 | -1.289493 |
| 1  | 0.552694  | -0.097285 | 4.237242  | 1 | 2.269234  | -4.155825 | -2.669714 |
| 6  | 1.625753  | 1.781108  | 4.267519  | 6 | 2.471526  | -1.375603 | -2.651290 |
| 1  | 2.006995  | 2.509256  | 3.529151  | 1 | 3.026486  | -0.473871 | -2.954308 |
| 1  | 2.500937  | 1.356743  | 4.783159  | 1 | 1.683875  | -1.061959 | -1.954499 |

|   |           |           |           |    |           |           |           |
|---|-----------|-----------|-----------|----|-----------|-----------|-----------|
| 1 | 1.990676  | -1.795230 | -3.551560 | 8  | -4.813503 | 1.720053  | -2.749070 |
| 6 | 7.478285  | -0.891415 | 0.721268  | 8  | -3.520229 | 1.094008  | -0.645286 |
| 6 | 8.003628  | 0.100426  | -0.330819 | 6  | -4.645893 | -0.831625 | -2.050003 |
| 6 | 8.231572  | -2.228664 | 0.641045  | 6  | -1.520959 | 1.836231  | -4.900279 |
| 1 | 7.678879  | -0.456514 | 1.716034  | 1  | -3.563377 | 1.206328  | -4.643790 |
| 1 | 7.499410  | 1.076814  | -0.247663 | 1  | -2.430871 | -0.142909 | -4.856299 |
| 1 | 9.087488  | 0.267363  | -0.211952 | 6  | -4.346543 | -1.726297 | -1.016889 |
| 1 | 7.836880  | -0.278697 | -1.353158 | 6  | -5.463949 | -1.195430 | -3.126450 |
| 1 | 7.877176  | -2.934981 | 1.409069  | 1  | -1.585281 | 1.904704  | -5.998446 |
| 1 | 8.095074  | -2.708523 | -0.342696 | 1  | -1.691543 | 2.836214  | -4.473259 |
| 1 | 9.314462  | -2.079914 | 0.788345  | 1  | -0.495925 | 1.528569  | -4.640729 |
| 6 | -6.505857 | -2.433643 | 0.839441  | 6  | -4.874557 | -3.019443 | -1.075112 |
| 6 | -6.984993 | -3.786623 | 1.389683  | 1  | -3.729780 | -1.409859 | -0.174795 |
| 6 | -7.126877 | -2.148097 | -0.538324 | 6  | -5.984227 | -2.490683 | -3.169006 |
| 1 | -6.863033 | -1.650270 | 1.530404  | 1  | -5.699845 | -0.470431 | -3.907434 |
| 1 | -6.564965 | -3.985627 | 2.388857  | 6  | -5.687547 | -3.401460 | -2.147430 |
| 1 | -8.084636 | -3.808426 | 1.472211  | 1  | -4.652421 | -3.728132 | -0.274462 |
| 1 | -6.687619 | -4.618468 | 0.729351  | 1  | -6.628877 | -2.787611 | -3.999917 |
| 1 | -6.838524 | -1.151051 | -0.905779 | 1  | -6.098095 | -4.413602 | -2.184925 |
| 1 | -6.797245 | -2.889828 | -1.285628 | 27 | 1.445143  | 0.391763  | 1.428813  |
| 1 | -8.228282 | -2.189858 | -0.491066 | 8  | 0.023999  | -0.782282 | 1.863237  |
| 9 | 0.239186  | 0.547704  | -0.587644 | 8  | 2.465654  | -1.116596 | 0.893928  |

-----  
**Structure S81. <sup>2</sup>INT13**  
 -----

|    |           |           |           |   |           |           |          |
|----|-----------|-----------|-----------|---|-----------|-----------|----------|
| 6  | 1.696508  | 3.417899  | -2.393374 | 7 | 0.400072  | 1.941748  | 1.781672 |
| 6  | 1.222633  | 2.142071  | -2.068708 | 7 | 2.923426  | 1.573355  | 1.257318 |
| 6  | -0.088863 | 1.973870  | -1.604237 | 6 | -1.209291 | -0.526405 | 2.161118 |
| 6  | -0.922016 | 3.094431  | -1.464457 | 6 | -2.147217 | -1.613726 | 2.339945 |
| 6  | -0.447536 | 4.367129  | -1.792665 | 6 | -3.476471 | -1.299700 | 2.600176 |
| 6  | 0.862764  | 4.533102  | -2.258715 | 1 | -4.195041 | -2.112995 | 2.703369 |
| 1  | 2.724322  | 3.540056  | -2.745390 | 6 | -3.975630 | 0.022706  | 2.719945 |
| 1  | 1.879229  | 1.274161  | -2.151840 | 6 | -3.069595 | 1.055366  | 2.586676 |
| 1  | -1.939193 | 2.961631  | -1.092289 | 1 | -3.412143 | 2.092743  | 2.657817 |
| 1  | -1.101428 | 5.235449  | -1.676504 | 6 | -1.700066 | 0.816388  | 2.312103 |
| 1  | 1.233960  | 5.530487  | -2.508577 | 6 | -0.851089 | 1.960320  | 2.129399 |
| 6  | -0.607192 | 0.605215  | -1.248872 | 1 | -1.341048 | 2.931802  | 2.270165 |
| 6  | -1.409757 | -0.092617 | -2.356652 | 6 | 1.147412  | 3.177354  | 1.492708 |
| 1  | -1.199196 | 0.650566  | -0.327319 | 1 | 1.106589  | 3.309996  | 0.399139 |
| 1  | -0.708740 | -0.313154 | -3.173385 | 6 | 2.615674  | 2.890200  | 1.840307 |
| 1  | -1.761297 | -1.064935 | -1.966736 | 1 | 2.668664  | 2.762466  | 2.938850 |
| 7  | -2.499164 | 0.701223  | -2.918698 | 6 | 3.517760  | 4.058383  | 1.440325 |
| 16 | -3.917495 | 0.806009  | -2.032818 | 1 | 3.508504  | 4.155787  | 0.340400 |
| 6  | -2.559694 | 0.847858  | -4.383229 | 1 | 4.558512  | 3.865552  | 1.743039 |
|    |           |           |           | 6 | 3.027058  | 5.359470  | 2.089323 |
|    |           |           |           | 1 | 3.144230  | 5.282382  | 3.185415 |
|    |           |           |           | 1 | 3.662690  | 6.199037  | 1.763628 |

6 1. 559285 5. 640981 1. 756619  
1 1. 460610 5. 822525 0. 671561  
1 1. 219483 6. 558812 2. 263576  
6 0. 651686 4. 466819 2. 146886  
1 -0. 380286 4. 684092 1. 831209  
1 0. 639177 4. 339024 3. 244077  
6 4. 095991 1. 273795 0. 790233  
1 4. 867476 2. 054384 0. 764514  
6 4. 504509 -0. 010733 0. 291245  
6 5. 809791 -0. 117804 -0. 256807  
1 6. 441927 0. 776708 -0. 273664  
6 6. 289903 -1. 309851 -0. 762620  
6 5. 416095 -2. 428463 -0. 727995  
1 5. 792964 -3. 361963 -1. 146215  
6 4. 127264 -2. 402061 -0. 211097  
6 3. 638990 -1. 159522 0. 354418  
6 -1. 664805 -3. 071783 2. 205441  
6 -0. 548781 -3. 355091 3. 237949  
1 -0. 926375 -3. 218416 4. 265311  
1 0. 306733 -2. 685528 3. 089116  
1 -0. 196187 -4. 396098 3. 144925  
6 -1. 128211 -3. 305741 0. 774201  
1 -0. 310960 -2. 613392 0. 544413  
1 -1. 929805 -3. 163250 0. 030256  
1 -0. 753743 -4. 337532 0. 668314  
6 -2. 795985 -4. 084275 2. 458385  
1 -3. 620589 -3. 978072 1. 736180  
1 -3. 218304 -3. 993043 3. 472159  
1 -2. 401954 -5. 108167 2. 355199  
6 3. 201103 -3. 633038 -0. 280875  
6 3. 908300 -4. 859946 -0. 885851  
1 4. 777150 -5. 177235 -0. 286461  
1 4. 251410 -4. 680022 -1. 917307  
1 3. 205060 -5. 707692 -0. 920289  
6 2. 705681 -4. 029224 1. 128859  
1 2. 124080 -3. 220569 1. 584665  
1 3. 557578 -4. 264127 1. 789385  
1 2. 070951 -4. 929338 1. 069479  
6 1. 995502 -3. 289351 -1. 187524  
1 2. 334402 -3. 083336 -2. 217006  
1 1. 457890 -2. 407221 -0. 821289  
1 1. 289225 -4. 135683 -1. 228539  
6 7. 690502 -1. 434412 -1. 345473  
6 7. 662710 -1. 826276 -2. 832101

6 8. 559611 -2. 412531 -0. 538002  
1 8. 159915 -0. 437271 -1. 274669  
1 7. 068635 -1. 111412 -3. 424353  
1 8. 681974 -1. 853636 -3. 253139  
1 7. 220014 -2. 826571 -2. 974638  
1 8. 615358 -2. 116853 0. 522156  
1 8. 150612 -3. 436342 -0. 578160  
1 9. 587908 -2. 451093 -0. 935851  
6 -5. 464173 0. 289516 2. 890265  
6 -6. 072276 -0. 442723 4. 095402  
6 -6. 227433 -0. 039935 1. 595210  
1 -5. 575928 1. 373339 3. 069870  
1 -5. 541713 -0. 191281 5. 028237  
1 -7. 133893 -0. 172490 4. 224310  
1 -6. 027487 -1. 537650 3. 969219  
1 -5. 793299 0. 495162 0. 736862  
1 -6. 179463 -1. 119077 1. 371380  
1 -7. 292678 0. 235903 1. 679107  
9 0. 476777 -0. 252569 -0. 999254

---

**Structure S82. 18**

---

6 -3. 974023 -2. 291852 -0. 513763  
6 -2. 946462 -1. 376484 -0. 754981  
6 -2. 967109 -0. 110803 -0. 147987  
6 -4. 030620 0. 228903 0. 698388  
6 -5. 061689 -0. 687009 0. 935048  
6 -5. 035390 -1. 948763 0. 332630  
1 -3. 950827 -3. 273745 -0. 993997  
1 -2. 122442 -1. 640351 -1. 424377  
1 -4. 052271 1. 216990 1. 162091  
1 -5. 890676 -0. 411671 1. 592739  
1 -5. 842294 -2. 662796 0. 517590  
6 -0. 604962 0. 495241 0. 481514  
1 -0. 862031 0. 680053 1. 535829  
1 -0. 410824 -0. 585675 0. 392032  
7 0. 588982 1. 271529 0. 156472  
16 1. 600241 0. 659056 -1. 022528  
6 1. 111061 2. 252482 1. 119037  
8 2. 527969 1. 728977 -1. 403843  
8 0. 734597 0. 015304 -2. 021662  
6 2. 552932 -0. 641291 -0. 229239  
6 0. 345830 3. 569215 1. 077830  
1 2. 167078 2. 434937 0. 879707

1 1.080954 1.809859 2.130774  
 6 3.729277 -0.305543 0.451851  
 6 2.080044 -1.958145 -0.267435  
 1 0.776727 4.281325 1.800818  
 1 0.406114 4.010143 0.070361  
 1 -0.716431 3.423126 1.320581  
 6 4.432989 -1.310137 1.120077  
 1 4.094462 0.722767 0.442560  
 6 2.794725 -2.952884 0.406125  
 1 1.178042 -2.198863 -0.832082  
 6 3.965257 -2.629741 1.100960  
 1 5.355151 -1.062493 1.651667  
 1 2.438485 -3.985623 0.380290  
 1 4.521623 -3.412012 1.623505  
 6 -1.819529 0.843368 -0.382156  
 1 -1.514366 0.831263 -1.439014  
 9 -2.213080 2.151507 -0.078809

-----  
**Structure S83. <sup>3</sup>INT14**  
 -----

27 0.074149 -0.328289 -1.642078  
 8 1.202525 0.975263 -0.903619  
 8 -1.362462 0.834721 -1.339087  
 7 1.520101 -1.563707 -1.796357  
 7 -0.951957 -1.881421 -1.127495  
 6 2.499638 1.007897 -0.750773  
 6 3.120502 2.201052 -0.240023  
 6 4.502039 2.188712 -0.061395  
 1 4.985916 3.082856 0.330791  
 6 5.333792 1.081990 -0.355375  
 6 4.726939 -0.054336 -0.860775  
 1 5.328382 -0.937230 -1.099323  
 6 3.329135 -0.110969 -1.066685  
 6 2.763439 -1.348519 -1.537025  
 1 3.470956 -2.177253 -1.664874  
 6 0.963955 -2.858041 -2.196439  
 1 0.499692 -2.682425 -3.182442  
 6 -0.166819 -3.129019 -1.191734  
 1 0.294126 -3.266229 -0.201492  
 6 -0.946899 -4.390395 -1.564701  
 1 -1.475279 -4.214289 -2.518336  
 1 -1.708441 -4.611660 -0.802009  
 6 0.007851 -5.585378 -1.694095  
 1 0.432174 -5.813675 -0.699853

1 -0.557742 -6.477569 -2.008226  
 6 1.149620 -5.304506 -2.676514  
 1 0.736857 -5.178274 -3.693208  
 1 1.838961 -6.163283 -2.718499  
 6 1.925773 -4.038084 -2.288911  
 1 2.715479 -3.829699 -3.028348  
 1 2.415730 -4.188924 -1.311035  
 6 -2.175824 -1.857839 -0.690259  
 1 -2.619257 -2.801569 -0.351819  
 6 -3.035548 -0.716131 -0.621348  
 6 -4.358344 -0.899230 -0.139021  
 1 -4.652198 -1.892535 0.214300  
 6 -5.261124 0.144265 -0.105419  
 6 -4.842476 1.393183 -0.639560  
 1 -5.580048 2.195790 -0.660941  
 6 -3.570181 1.644338 -1.134715  
 6 -2.599148 0.580354 -1.050942  
 6 2.268223 3.447047 0.071188  
 6 1.194753 3.103651 1.129437  
 1 1.663789 2.772387 2.071270  
 1 0.533910 2.306290 0.775805  
 1 0.579630 3.990895 1.354551  
 6 1.593904 3.936931 -1.232236  
 1 0.962846 3.157822 -1.677692  
 1 2.355160 4.231971 -1.973266  
 1 0.962809 4.817631 -1.028291  
 6 3.116475 4.606002 0.624519  
 1 3.886891 4.938497 -0.089343  
 1 3.616278 4.340841 1.570256  
 1 2.464396 5.470347 0.828354  
 6 -3.177553 2.990976 -1.774547  
 6 -4.380888 3.944697 -1.885572  
 1 -4.792493 4.214206 -0.899593  
 1 -5.195684 3.516315 -2.491268  
 1 -4.063009 4.880194 -2.372924  
 6 -2.092477 3.696432 -0.929455  
 1 -1.210990 3.059503 -0.800389  
 1 -2.484833 3.967265 0.064962  
 1 -1.773490 4.629253 -1.423317  
 6 -2.646577 2.737560 -3.207725  
 1 -3.435187 2.293566 -3.838053  
 1 -1.782906 2.059596 -3.217089  
 1 -2.342956 3.690722 -3.672331  
 6 -6.660905 -0.024518 0.466316

|    |           |           |           |
|----|-----------|-----------|-----------|
| 6  | -7.752532 | 0.228661  | -0.585413 |
| 6  | -6.868438 | 0.863676  | 1.704238  |
| 1  | -6.750496 | -1.075637 | 0.791556  |
| 1  | -7.623723 | -0.427707 | -1.461183 |
| 1  | -8.754764 | 0.042939  | -0.164195 |
| 1  | -7.733082 | 1.272014  | -0.942679 |
| 1  | -6.104319 | 0.663050  | 2.472713  |
| 1  | -6.806568 | 1.933403  | 1.441670  |
| 1  | -7.860447 | 0.689913  | 2.154020  |
| 6  | 6.832001  | 1.140887  | -0.095200 |
| 6  | 7.135412  | 1.262807  | 1.407380  |
| 6  | 7.514202  | 2.265674  | -0.889473 |
| 1  | 7.256995  | 0.183322  | -0.443032 |
| 1  | 6.684074  | 0.433057  | 1.974999  |
| 1  | 8.222581  | 1.252015  | 1.593211  |
| 1  | 6.736884  | 2.205492  | 1.819110  |
| 1  | 7.317433  | 2.169977  | -1.969465 |
| 1  | 7.154874  | 3.258419  | -0.570393 |
| 1  | 8.606435  | 2.246570  | -0.738169 |
| 9  | -0.003545 | -0.184948 | -3.491048 |
| 16 | -0.133860 | -2.113594 | 2.859745  |
| 8  | 0.144219  | -2.737858 | 4.158801  |
| 8  | -0.801168 | -2.892201 | 1.815290  |
| 6  | -0.954456 | -0.551870 | 3.104808  |
| 6  | -1.465274 | -0.267731 | 4.375859  |
| 6  | -1.131346 | 0.309783  | 2.017080  |
| 6  | -2.185086 | 0.915665  | 4.554133  |
| 1  | -1.299486 | -0.960828 | 5.202069  |
| 6  | -1.845423 | 1.491179  | 2.217095  |
| 1  | -0.708710 | 0.081999  | 1.040115  |
| 6  | -2.375109 | 1.789902  | 3.477437  |
| 1  | -2.596270 | 1.154835  | 5.537674  |
| 1  | -1.986022 | 2.175323  | 1.381248  |
| 1  | -2.938053 | 2.715357  | 3.621835  |
| 7  | 1.369793  | -1.498242 | 2.111812  |
| 9  | 1.923892  | -2.641441 | 1.461544  |
| 6  | 2.351102  | -1.080541 | 3.120217  |
| 6  | 3.615711  | -0.539044 | 2.475817  |
| 1  | 2.563939  | -1.916971 | 3.807897  |
| 1  | 1.840456  | -0.290839 | 3.695909  |
| 1  | 4.308142  | -0.206079 | 3.264033  |
| 1  | 4.118248  | -1.315204 | 1.882357  |
| 1  | 3.396344  | 0.314233  | 1.820099  |

**Structure S84. <sup>3</sup>TS24**

|    |           |           |           |
|----|-----------|-----------|-----------|
| 27 | -0.088511 | 0.447177  | -1.046242 |
| 8  | -1.272874 | -1.004374 | -1.131773 |
| 8  | 1.233201  | -0.736071 | -0.463199 |
| 7  | -1.417823 | 1.698637  | -1.598461 |
| 7  | 1.031114  | 1.966658  | -0.760345 |
| 6  | -2.561164 | -0.949068 | -1.003521 |
| 6  | -3.268724 | -2.067476 | -0.429083 |
| 6  | -4.657222 | -2.027962 | -0.440130 |
| 1  | -5.207832 | -2.868674 | -0.018831 |
| 6  | -5.421760 | -0.943473 | -0.943560 |
| 6  | -4.734956 | 0.162253  | -1.410151 |
| 1  | -5.284506 | 1.046222  | -1.748762 |
| 6  | -3.319078 | 0.197618  | -1.416498 |
| 6  | -2.676185 | 1.438508  | -1.741909 |
| 1  | -3.336697 | 2.238080  | -2.100392 |
| 6  | -0.805108 | 3.001151  | -1.876383 |
| 1  | -0.249639 | 2.886042  | -2.823611 |
| 6  | 0.243606  | 3.197616  | -0.760121 |
| 1  | -0.289653 | 3.212362  | 0.203817  |
| 6  | 1.015350  | 4.504685  | -0.920301 |
| 1  | 1.622641  | 4.461832  | -1.841526 |
| 1  | 1.706091  | 4.638039  | -0.073158 |
| 6  | 0.041703  | 5.687192  | -0.997768 |
| 1  | -0.493697 | 5.780823  | -0.035987 |
| 1  | 0.606430  | 6.622938  | -1.138382 |
| 6  | -0.973018 | 5.500338  | -2.129257 |
| 1  | -0.442691 | 5.491562  | -3.098242 |
| 1  | -1.675811 | 6.348542  | -2.160852 |
| 6  | -1.758347 | 4.191874  | -1.972611 |
| 1  | -2.444793 | 4.062752  | -2.823792 |
| 1  | -2.373406 | 4.234163  | -1.056233 |
| 6  | 2.320403  | 1.913900  | -0.729446 |
| 1  | 2.882900  | 2.853835  | -0.664344 |
| 6  | 3.107751  | 0.715451  | -0.768438 |
| 6  | 4.515387  | 0.845503  | -0.835066 |
| 1  | 4.947966  | 1.850504  | -0.858984 |
| 6  | 5.338310  | -0.265323 | -0.874555 |
| 6  | 4.717352  | -1.541352 | -0.892512 |
| 1  | 5.370874  | -2.408891 | -0.979656 |
| 6  | 3.345142  | -1.743986 | -0.827303 |
| 6  | 2.500442  | -0.582182 | -0.687920 |
| 6  | -2.484036 | -3.216060 | 0.232258  |



|   |           |           |           |    |           |           |           |
|---|-----------|-----------|-----------|----|-----------|-----------|-----------|
| 1 | -0.174766 | 2.648773  | -3.097412 | 1  | 1.213481  | -2.763047 | 0.729036  |
| 6 | 0.359819  | 3.062616  | -1.061290 | 1  | 2.655192  | -3.371412 | 1.580960  |
| 1 | -0.157155 | 3.103133  | -0.086664 | 1  | 1.613437  | -4.498410 | 0.679188  |
| 6 | 1.114121  | 4.366870  | -1.300468 | 6  | 2.035549  | -3.449258 | -1.872003 |
| 1 | 1.701428  | 4.286409  | -2.232407 | 1  | 2.671237  | -3.400587 | -2.771613 |
| 1 | 1.824052  | 4.547556  | -0.478013 | 1  | 1.264782  | -2.673427 | -1.961620 |
| 6 | 0.126822  | 5.535455  | -1.407659 | 1  | 1.540377  | -4.433486 | -1.860863 |
| 1 | -0.387171 | 5.664481  | -0.438673 | 6  | 6.974741  | -0.205332 | -0.646892 |
| 1 | 0.677730  | 6.469689  | -1.602784 | 6  | 7.689248  | -0.999899 | -1.752853 |
| 6 | -0.910832 | 5.287237  | -2.505920 | 6  | 7.508709  | -0.588482 | 0.745550  |
| 1 | -0.402333 | 5.241564  | -3.485644 | 1  | 7.193233  | 0.863651  | -0.807913 |
| 1 | -1.623993 | 6.125663  | -2.558559 | 1  | 7.319122  | -0.720597 | -2.752152 |
| 6 | -1.677411 | 3.979003  | -2.273863 | 1  | 8.773408  | -0.803269 | -1.723867 |
| 1 | -2.379682 | 3.807557  | -3.104426 | 1  | 7.546726  | -2.086059 | -1.630063 |
| 1 | -2.272272 | 4.054247  | -1.346592 | 1  | 7.027975  | 0.006968  | 1.538353  |
| 6 | 2.437615  | 1.806822  | -0.944931 | 1  | 7.323652  | -1.653393 | 0.963660  |
| 1 | 3.000716  | 2.748522  | -0.944262 | 1  | 8.596204  | -0.417886 | 0.802271  |
| 6 | 3.236725  | 0.606425  | -0.840439 | 6  | -6.811826 | -1.205391 | -0.995758 |
| 6 | 4.628011  | 0.740529  | -0.839966 | 6  | -7.382984 | -1.181572 | 0.432585  |
| 1 | 5.063282  | 1.739194  | -0.937997 | 6  | -7.327503 | -2.425665 | -1.775678 |
| 6 | 5.468687  | -0.367347 | -0.704246 | 1  | -7.175034 | -0.300951 | -1.514005 |
| 6 | 4.876850  | -1.654815 | -0.608675 | 1  | -7.041885 | -0.292420 | 0.986339  |
| 1 | 5.550337  | -2.508055 | -0.543983 | 1  | -8.485630 | -1.169766 | 0.413373  |
| 6 | 3.510537  | -1.873204 | -0.604178 | 1  | -7.071093 | -2.071231 | 1.004825  |
| 6 | 2.635833  | -0.704695 | -0.659279 | 1  | -6.950581 | -2.428114 | -2.811152 |
| 6 | -2.349441 | -3.234391 | 0.455140  | 1  | -7.009933 | -3.368868 | -1.300343 |
| 6 | -1.525074 | -2.502425 | 1.546772  | 1  | -8.429722 | -2.428326 | -1.813329 |
| 1 | -2.197537 | -2.014093 | 2.270607  | 9  | 0.620252  | 0.018583  | -2.817264 |
| 1 | -0.874004 | -1.725035 | 1.128045  | 16 | -0.678048 | 2.103526  | 3.126935  |
| 1 | -0.902172 | -3.225879 | 2.098799  | 8  | -0.920817 | 2.415105  | 4.549437  |
| 6 | -1.419005 | -4.032800 | -0.485005 | 8  | -0.511754 | 3.245775  | 2.206797  |
| 1 | -0.682968 | -3.379443 | -0.963221 | 6  | 0.750549  | 1.033296  | 3.008819  |
| 1 | -2.003488 | -4.536388 | -1.273333 | 6  | 0.688725  | -0.275804 | 3.495313  |
| 1 | -0.881551 | -4.810335 | 0.082420  | 6  | 1.931029  | 1.573276  | 2.497063  |
| 6 | -3.277598 | -4.239031 | 1.160866  | 6  | 1.841316  | -1.062409 | 3.449649  |
| 1 | -3.876982 | -4.826366 | 0.446361  | 1  | -0.248463 | -0.679114 | 3.880249  |
| 1 | -3.967112 | -3.745902 | 1.864705  | 6  | 3.081444  | 0.780935  | 2.476293  |
| 1 | -2.669952 | -4.950879 | 1.742239  | 1  | 1.941487  | 2.593894  | 2.112836  |
| 6 | 2.896782  | -3.279531 | -0.594264 | 6  | 3.036373  | -0.535971 | 2.945075  |
| 6 | 3.975994  | -4.376488 | -0.606633 | 1  | 1.802430  | -2.094509 | 3.805005  |
| 1 | 4.611329  | -4.346205 | 0.293329  | 1  | 4.012653  | 1.188772  | 2.078369  |
| 1 | 4.627950  | -4.312348 | -1.492369 | 1  | 3.935003  | -1.156553 | 2.909694  |
| 1 | 3.488102  | -5.363524 | -0.629783 | 7  | -1.964266 | 1.072003  | 2.742744  |
| 6 | 2.036998  | -3.481436 | 0.675749  | 9  | -0.578631 | 0.679795  | 0.594529  |

6 -2.988717 1.671572 1.927950  
6 -4.272542 0.857758 1.967962  
1 -2.567525 1.693728 0.903568  
1 -3.163779 2.730027 2.205573  
1 -5.032024 1.321863 1.320436  
1 -4.095224 -0.165597 1.606291  
1 -4.676247 0.803863 2.991633

-----  
**Structure S86. Co<sup>IV</sup>(salen)-F<sub>2</sub>**  
-----

27 0.000010 0.733755 0.000165  
8 1.276383 -0.640308 0.297949  
8 -1.276429 -0.640274 -0.297878  
7 1.236857 2.110773 0.408477  
7 -1.236810 2.110865 -0.408030  
6 2.543757 -0.535657 0.180345  
6 3.335759 -1.719740 -0.114411  
6 4.715451 -1.596992 -0.093767  
1 5.326711 -2.475240 -0.299435  
6 5.398627 -0.378558 0.161801  
6 4.636169 0.768062 0.360662  
1 5.134486 1.729188 0.520009  
6 3.231051 0.726709 0.346776  
6 2.512283 1.966591 0.501831  
1 3.130662 2.848939 0.708320  
6 0.539550 3.386897 0.555032  
1 0.001708 3.325136 1.517068  
6 -0.539376 3.386889 -0.554738  
1 -0.001533 3.324916 -1.516756  
6 -1.399767 4.647846 -0.512902  
1 -1.993064 4.646884 0.418473  
1 -2.109556 4.651705 -1.355289  
6 -0.518548 5.902075 -0.563047  
1 -0.000566 5.944542 -1.537797  
1 -1.153066 6.800876 -0.502103  
6 0.518924 5.902078 0.563092  
1 0.000946 5.944661 1.537840  
1 1.153515 6.800822 0.502080  
6 1.400046 4.647777 0.513042  
1 2.109868 4.651658 1.355402  
1 1.993302 4.646683 -0.418359  
6 -2.512197 1.966711 -0.501827  
1 -3.130496 2.849049 -0.708607  
6 -3.231025 0.726842 -0.346811

6 -4.636109 0.768193 -0.360956  
1 -5.134411 1.729305 -0.520417  
6 -5.398622 -0.378439 -0.162185  
6 -4.715529 -1.596870 0.093586  
1 -5.326851 -2.475092 0.299180  
6 -3.335849 -1.719638 0.114489  
6 -2.543775 -0.535571 -0.180261  
6 2.628785 -3.026900 -0.503915  
6 1.784123 -2.760157 -1.776427  
1 2.443341 -2.524676 -2.628418  
1 1.090801 -1.918895 -1.646535  
1 1.202207 -3.658486 -2.039583  
6 1.730714 -3.523919 0.652609  
1 0.940847 -2.803743 0.885922  
1 2.329904 -3.692685 1.562946  
1 1.259602 -4.481603 0.377779  
6 3.631884 -4.147851 -0.829511  
1 4.250241 -4.417628 0.041937  
1 4.304130 -3.879613 -1.660008  
1 3.081151 -5.052083 -1.133673  
6 -2.628961 -3.026776 0.504195  
6 -3.632165 -4.147610 0.829855  
1 -4.250441 -4.417472 -0.041625  
1 -4.304484 -3.879207 1.660239  
1 -3.081525 -5.051837 1.134196  
6 -1.730796 -3.523990 -0.652163  
1 -0.940865 -2.803890 -0.885465  
1 -2.329870 -3.692839 -1.562564  
1 -1.259779 -4.481664 -0.377146  
6 -1.784355 -2.759932 1.776734  
1 -2.443582 -2.524230 2.628658  
1 -1.090898 -1.918795 1.646767  
1 -1.202597 -3.658315 2.040052  
6 -6.916114 -0.333783 -0.179841  
6 -7.510791 -0.708610 1.188852  
6 -7.495256 -1.221406 -1.294695  
1 -7.206662 0.708385 -0.396640  
1 -7.123524 -0.055714 1.987339  
1 -8.609248 -0.614767 1.173349  
1 -7.270507 -1.750280 1.459230  
1 -7.099754 -0.936333 -2.282703  
1 -7.252185 -2.283999 -1.128295  
1 -8.593792 -1.133401 -1.328493  
6 6.916132 -0.333925 0.179113

6 7. 510484 -0. 708790 -1. 189701  
6 7. 495529 -1. 221511 1. 293863  
1 7. 206738 0. 708248 0. 395816  
1 7. 123038 -0. 055905 -1. 988110  
1 8. 608949 -0. 614975 -1. 174470  
1 7. 270119 -1. 750461 -1. 460009  
1 7. 100251 -0. 936394 2. 281949  
1 7. 252409 -2. 284109 1. 127557  
1 8. 594074 -1. 133517 1. 327409  
9 -0. 578801 0. 754714 1. 746154  
9 0. 578785 0. 755105 -1. 745874

---

**Structure S87.** [Co<sup>II</sup>(salen)-F]<sup>-</sup>

---

27 0. 019706 0. 777266 0. 974132  
8 1. 321307 -0. 590530 0. 289817  
8 -1. 565232 -0. 457434 0. 956653  
7 1. 531759 2. 166092 0. 347643  
7 -1. 098073 2. 172799 -0. 075035  
6 2. 576320 -0. 581988 -0. 005143  
6 3. 280386 -1. 836763 -0. 199890  
6 4. 631035 -1. 806693 -0. 533936  
1 5. 158712 -2. 750524 -0. 677460  
6 5. 379572 -0. 617269 -0. 702663  
6 4. 707770 0. 581411 -0. 515887  
1 5. 248937 1. 527459 -0. 637019  
6 3. 338124 0. 634411 -0. 170290  
6 2. 743274 1. 953677 -0. 009734  
1 3. 423280 2. 798619 -0. 223372  
6 0. 907573 3. 464001 0. 487085  
1 0. 587106 3. 494728 1. 545051  
6 -0. 398174 3. 435511 -0. 351996  
1 -0. 099513 3. 440016 -1. 419545  
6 -1. 224313 4. 698512 -0. 065691  
1 -1. 539769 4. 668188 0. 992273  
1 -2. 142702 4. 704061 -0. 673571  
6 -0. 409703 5. 968487 -0. 340435  
1 -0. 190484 6. 028529 -1. 422485  
1 -1. 009851 6. 860066 -0. 091814  
6 0. 909314 5. 978675 0. 440734  
1 0. 688948 6. 037593 1. 521760  
1 1. 497924 6. 876802 0. 188275  
6 1. 732622 4. 712445 0. 171781  
1 2. 650669 4. 720466 0. 781956

1 2. 049952 4. 690498 -0. 886851  
6 -2. 258736 1. 945342 -0. 599215  
1 -2. 710145 2. 720736 -1. 243456  
6 -3. 072944 0. 758591 -0. 459192  
6 -4. 318103 0. 765484 -1. 141090  
1 -4. 585313 1. 657150 -1. 719954  
6 -5. 192347 -0. 304186 -1. 098800  
6 -4. 796646 -1. 434120 -0. 335909  
1 -5. 487159 -2. 277883 -0. 304284  
6 -3. 597725 -1. 523351 0. 357424  
6 -2. 677202 -0. 396453 0. 319535  
6 2. 515931 -3. 167137 -0. 035367  
6 1. 371101 -3. 240048 -1. 073094  
1 1. 776880 -3. 220153 -2. 098982  
1 0. 682131 -2. 395176 -0. 954885  
1 0. 801234 -4. 177591 -0. 954488  
6 1. 937294 -3. 268789 1. 396061  
1 1. 270798 -2. 425339 1. 613122  
1 2. 749730 -3. 271572 2. 142544  
1 1. 366418 -4. 205629 1. 515618  
6 3. 421024 -4. 393166 -0. 256883  
1 4. 254116 -4. 431997 0. 463714  
1 3. 847727 -4. 419596 -1. 272806  
1 2. 830945 -5. 315139 -0. 126303  
6 -3. 216014 -2. 783205 1. 162191  
6 -4. 296118 -3. 877467 1. 078968  
1 -4. 464472 -4. 218586 0. 044420  
1 -5. 262898 -3. 543058 1. 489288  
1 -3. 977710 -4. 754968 1. 665272  
6 -1. 900331 -3. 377238 0. 606517  
1 -1. 081548 -2. 652962 0. 681815  
1 -2. 017751 -3. 661442 -0. 452595  
1 -1. 619117 -4. 284465 1. 168755  
6 -3. 032168 -2. 419019 2. 654248  
1 -3. 972442 -2. 029572 3. 080228  
1 -2. 252612 -1. 656930 2. 779891  
1 -2. 744796 -3. 312489 3. 235404  
6 -6. 526444 -0. 282847 -1. 832162  
6 -7. 718970 -0. 367167 -0. 864279  
6 -6. 615627 -1. 382343 -2. 903882  
1 -6. 592151 0. 689753 -2. 351475  
1 -7. 686318 0. 442316 -0. 117135  
1 -8. 677107 -0. 292297 -1. 406763  
1 -7. 722851 -1. 324855 -0. 316539

1 -5.789903 -1.303000 -3.629504  
 1 -6.565040 -2.387270 -2.451727  
 1 -7.566331 -1.317639 -3.460470  
 6 6.855319 -0.664664 -1.074534  
 6 7.080777 -1.298325 -2.457662  
 6 7.698231 -1.378040 -0.004597  
 1 7.208154 0.380786 -1.128721  
 1 6.513777 -0.765266 -3.238203  
 1 8.148351 -1.278152 -2.736917  
 1 6.754609 -2.352172 -2.471137  
 1 7.574114 -0.904557 0.982870  
 1 7.404971 -2.436864 0.095162  
 1 8.771297 -1.355258 -0.261630  
 9 0.208458 1.448036 2.745312

-----  
**Structure S88. PhSO<sub>2</sub>N<sup>+</sup>(Et)**  
 -----

16 -0.653826 -1.010360 -0.274943  
 8 -1.139549 -0.950519 -1.645788  
 8 -0.772402 -2.185765 0.568851  
 6 0.924445 -0.242137 -0.098284  
 6 1.363273 0.626834 -1.105725  
 6 1.681347 -0.531186 1.045110  
 6 2.610481 1.231002 -0.949298  
 1 0.752563 0.814666 -1.990426  
 6 2.923361 0.089772 1.179720  
 1 1.315415 -1.228864 1.800453  
 6 3.382880 0.965735 0.188649  
 1 2.982996 1.907141 -1.721776  
 1 3.536682 -0.117759 2.059169  
 1 4.358374 1.444751 0.302065  
 7 -1.724046 0.215295 0.589871  
 6 -2.619853 0.918011 -0.006205  
 6 -3.519232 1.863830 0.667420  
 1 -2.697302 0.779454 -1.094522  
 1 -1.595418 0.278632 1.608965  
 1 -3.402974 2.850714 0.184590  
 1 -4.558973 1.552324 0.459118  
 1 -3.346434 1.936737 1.749534

-----  
**Structure S89. <sup>1</sup>TS25**  
 -----

6 3.633071 -1.667574 -0.410357  
 6 2.371114 -1.500278 0.364508

6 2.053576 -0.109805 0.844263  
 6 2.919961 0.954655 0.435350  
 6 4.040188 0.713527 -0.316124  
 6 4.415577 -0.614755 -0.739647  
 1 3.893322 -2.682407 -0.723617  
 1 2.356380 -2.220789 1.203660  
 1 2.674109 1.973582 0.743327  
 1 4.679958 1.552666 -0.603869  
 1 5.328746 -0.750119 -1.323161  
 6 0.924030 0.173604 1.607504  
 6 0.017368 -0.795209 2.074281  
 1 0.700143 1.223332 1.809654  
 1 0.352911 -1.826795 2.200555  
 1 -0.764011 -0.475926 2.767006  
 7 -1.295093 -1.386252 0.682913  
 16 -1.405774 -0.571637 -0.885171  
 6 -1.907362 -2.487248 0.923598  
 8 -2.748114 -0.808436 -1.419996  
 8 -0.213806 -0.986306 -1.629064  
 6 -1.267252 1.133436 -0.405997  
 6 -2.808062 -3.295827 0.057766  
 1 -1.732881 -2.879498 1.939940  
 1 1.532420 -1.831662 -0.281419  
 6 -2.249357 1.680068 0.427103  
 6 -0.216732 1.890645 -0.929388  
 1 -2.796769 -4.338866 0.402848  
 1 -3.838198 -2.913825 0.179464  
 1 -2.558005 -3.234675 -1.008143  
 6 -2.148187 3.028755 0.770477  
 1 -3.072091 1.068453 0.803551  
 6 -0.142400 3.243092 -0.588909  
 1 0.531396 1.428245 -1.574181  
 6 -1.098498 3.806310 0.263258  
 1 -2.895943 3.477146 1.428460  
 1 0.669852 3.855327 -0.987149  
 1 -1.030148 4.863329 0.531782

-----  
**Structure S90. 19**  
 -----

6 4.676755 -1.652226 -1.111182  
 6 3.398444 -1.133950 -1.060391  
 6 3.016178 -0.283177 0.029388  
 6 3.978076 0.023756 1.049251  
 6 5.255414 -0.502730 0.982752

|    |           |           |           |    |           |           |           |
|----|-----------|-----------|-----------|----|-----------|-----------|-----------|
| 6  | 5.601279  | -1.336676 | -0.093953 | 1  | 0.798237  | 5.061868  | -0.969603 |
| 1  | 4.977872  | -2.300280 | -1.936388 | 1  | -0.756848 | 6.474046  | 0.340455  |
| 1  | 2.682335  | -1.370749 | -1.848559 | 1  | -2.091638 | 5.482839  | 2.210013  |
| 1  | 3.683747  | 0.674719  | 1.875981  | 6  | 1.272477  | 2.454571  | -0.652739 |
| 1  | 5.990615  | -0.273936 | 1.756197  | 6  | 1.541983  | 0.992142  | -0.511865 |
| 1  | 6.612635  | -1.748504 | -0.147749 | 1  | 1.834163  | 2.962613  | -1.443334 |
| 6  | 1.736925  | 0.251784  | 0.156902  | 1  | 0.939410  | 0.528339  | 0.285427  |
| 6  | 0.569539  | 0.014146  | -0.734004 | 1  | 1.265050  | 0.484954  | -1.448160 |
| 1  | 1.542916  | 0.885839  | 1.027462  | 7  | 2.978208  | 0.745718  | -0.295722 |
| 1  | 0.875724  | -0.064677 | -1.790188 | 16 | 3.614283  | -0.682880 | -0.894754 |
| 1  | 0.193433  | -1.001102 | -0.486041 | 6  | 3.592627  | 1.280593  | 0.934272  |
| 7  | -0.491484 | 0.994668  | -0.628511 | 8  | 5.072895  | -0.589004 | -0.747840 |
| 16 | -1.496602 | 0.891166  | 0.723792  | 8  | 3.006983  | -0.909814 | -2.211488 |
| 6  | -0.354837 | 2.273289  | -1.346076 | 6  | 3.033095  | -1.972013 | 0.214754  |
| 8  | -2.189426 | 2.177286  | 0.834250  | 6  | 4.624633  | 2.360673  | 0.639813  |
| 8  | -0.690541 | 0.366690  | 1.840718  | 1  | 4.051423  | 0.461821  | 1.513280  |
| 6  | -2.679303 | -0.374037 | 0.276893  | 1  | 2.778517  | 1.678121  | 1.559866  |
| 6  | 0.662107  | 3.231996  | -0.737539 | 6  | 3.891537  | -2.462699 | 1.204728  |
| 1  | -1.346521 | 2.743272  | -1.379354 | 6  | 1.707519  | -2.411307 | 0.109250  |
| 1  | -0.085956 | 2.020703  | -2.384884 | 1  | 5.073229  | 2.735186  | 1.574932  |
| 6  | -3.771628 | -0.016520 | -0.522272 | 1  | 5.424050  | 1.950843  | 0.004859  |
| 6  | -2.486071 | -1.685195 | 0.723251  | 1  | 4.161897  | 3.210579  | 0.113218  |
| 1  | 0.697099  | 4.167211  | -1.319508 | 6  | 3.406005  | -3.408610 | 2.112280  |
| 1  | 0.387357  | 3.482676  | 0.298793  | 1  | 4.924024  | -2.112859 | 1.250227  |
| 1  | 1.681805  | 2.809175  | -0.739848 | 6  | 1.233542  | -3.349502 | 1.029000  |
| 6  | -4.681548 | -1.007059 | -0.893614 | 1  | 1.053669  | -2.033168 | -0.677104 |
| 1  | -3.910408 | 1.019783  | -0.835813 | 6  | 2.079567  | -3.846153 | 2.027549  |
| 6  | -3.405433 | -2.666436 | 0.339384  | 1  | 4.067828  | -3.804114 | 2.887008  |
| 1  | -1.641814 | -1.925807 | 1.371244  | 1  | 0.196348  | -3.679397 | 0.955497  |
| 6  | -4.496814 | -2.328875 | -0.467186 | 1  | 1.702511  | -4.581793 | 2.742862  |
| 1  | -5.543206 | -0.745473 | -1.512380 | 16 | -1.968574 | -1.383086 | -0.108846 |
| 1  | -3.271814 | -3.695613 | 0.681113  | 8  | -1.211661 | -0.616565 | 0.891479  |
| 1  | -5.214553 | -3.098900 | -0.760543 | 8  | -1.615543 | -2.773531 | -0.396573 |

---

**Structure S91. <sup>2</sup>INT16**

---

|   |           |          |           |
|---|-----------|----------|-----------|
| 6 | -1.262623 | 3.493907 | 1.935007  |
| 6 | -0.391406 | 2.689944 | 1.208569  |
| 6 | 0.383244  | 3.228902 | 0.132222  |
| 6 | 0.219500  | 4.621738 | -0.152586 |
| 6 | -0.654037 | 5.412500 | 0.582364  |
| 6 | -1.404988 | 4.858202 | 1.633182  |
| 1 | -1.842323 | 3.054137 | 2.751787  |
| 1 | -0.314661 | 1.630583 | 1.455286  |

|    |           |           |           |
|----|-----------|-----------|-----------|
| 1  | 0.798237  | 5.061868  | -0.969603 |
| 1  | -0.756848 | 6.474046  | 0.340455  |
| 1  | -2.091638 | 5.482839  | 2.210013  |
| 6  | 1.272477  | 2.454571  | -0.652739 |
| 6  | 1.541983  | 0.992142  | -0.511865 |
| 1  | 1.834163  | 2.962613  | -1.443334 |
| 1  | 0.939410  | 0.528339  | 0.285427  |
| 1  | 1.265050  | 0.484954  | -1.448160 |
| 7  | 2.978208  | 0.745718  | -0.295722 |
| 16 | 3.614283  | -0.682880 | -0.894754 |
| 6  | 3.592627  | 1.280593  | 0.934272  |
| 8  | 5.072895  | -0.589004 | -0.747840 |
| 8  | 3.006983  | -0.909814 | -2.211488 |
| 6  | 3.033095  | -1.972013 | 0.214754  |
| 6  | 4.624633  | 2.360673  | 0.639813  |
| 1  | 4.051423  | 0.461821  | 1.513280  |
| 1  | 2.778517  | 1.678121  | 1.559866  |
| 6  | 3.891537  | -2.462699 | 1.204728  |
| 6  | 1.707519  | -2.411307 | 0.109250  |
| 1  | 5.073229  | 2.735186  | 1.574932  |
| 1  | 5.424050  | 1.950843  | 0.004859  |
| 1  | 4.161897  | 3.210579  | 0.113218  |
| 6  | 3.406005  | -3.408610 | 2.112280  |
| 1  | 4.924024  | -2.112859 | 1.250227  |
| 6  | 1.233542  | -3.349502 | 1.029000  |
| 1  | 1.053669  | -2.033168 | -0.677104 |
| 6  | 2.079567  | -3.846153 | 2.027549  |
| 1  | 4.067828  | -3.804114 | 2.887008  |
| 1  | 0.196348  | -3.679397 | 0.955497  |
| 1  | 1.702511  | -4.581793 | 2.742862  |
| 16 | -1.968574 | -1.383086 | -0.108846 |
| 8  | -1.211661 | -0.616565 | 0.891479  |
| 8  | -1.615543 | -2.773531 | -0.396573 |
| 6  | -3.711665 | -1.236573 | 0.214836  |
| 6  | -4.152557 | -0.294726 | 1.150073  |
| 6  | -4.590112 | -2.075926 | -0.479864 |
| 6  | -5.524374 | -0.192355 | 1.390876  |
| 1  | -3.436285 | 0.342321  | 1.671624  |
| 6  | -5.957662 | -1.955565 | -0.228850 |
| 1  | -4.208806 | -2.805673 | -1.196166 |
| 6  | -6.421120 | -1.017774 | 0.702504  |
| 1  | -5.893033 | 0.534366  | 2.118371  |
| 1  | -6.663709 | -2.598815 | -0.759043 |
| 1  | -7.493401 | -0.931145 | 0.895161  |

7 -1.916527 -0.581093 -1.697466  
 9 -0.588761 -0.861277 -2.143532  
 6 -2.035838 0.879963 -1.627454  
 6 -1.898817 1.506362 -3.006005  
 1 -1.303868 1.298112 -0.920856  
 1 -3.042532 1.060785 -1.218748  
 1 -2.059115 2.592532 -2.925470  
 1 -0.893271 1.339304 -3.418593  
 1 -2.639707 1.091742 -3.707211

-----  
**Structure S92. <sup>2</sup>TS26**  
 -----

6 0.867072 3.912357 2.169176  
 6 0.961602 2.798194 1.341400  
 6 1.308654 2.940527 -0.030464  
 6 1.545036 4.252813 -0.524458  
 6 1.452406 5.360715 0.311312  
 6 1.112573 5.197837 1.662777  
 1 0.595461 3.783801 3.220235  
 1 0.750111 1.807911 1.746825  
 1 1.802824 4.381845 -1.578965  
 1 1.642404 6.360609 -0.087390  
 1 1.037138 6.068945 2.318564  
 6 1.368159 1.831334 -0.929060  
 6 1.426008 0.385702 -0.544016  
 1 1.639027 2.045871 -1.967065  
 1 0.932796 0.193279 0.420612  
 1 0.868976 -0.173865 -1.303387  
 7 2.813442 -0.100182 -0.540575  
 16 3.067470 -1.647415 -1.138035  
 6 3.721964 0.363010 0.524611  
 8 4.521140 -1.857345 -1.152764  
 8 2.278624 -1.775487 -2.367459  
 6 2.357755 -2.750239 0.092139  
 6 4.859816 1.214032 -0.021744  
 1 4.122667 -0.502249 1.078385  
 1 3.119912 0.935142 1.246576  
 6 3.199397 -3.393473 1.005746  
 6 0.964870 -2.887617 0.152531  
 1 5.520823 1.550527 0.794111  
 1 5.454864 0.628771 -0.738410  
 1 4.467747 2.104528 -0.539012  
 6 2.629490 -4.186938 2.006085  
 1 4.281427 -3.279288 0.922226

6 0.411168 -3.675021 1.164298  
 1 0.317855 -2.387540 -0.569016  
 6 1.239203 -4.323203 2.088593  
 1 3.275643 -4.700329 2.722653  
 1 -0.675046 -3.776750 1.228154  
 1 0.798520 -4.940103 2.876076  
 16 -2.104367 -0.357181 -0.268459  
 8 -1.471199 -0.333031 1.061538  
 8 -1.478164 -1.106646 -1.363695  
 6 -3.801045 -0.886568 -0.095722  
 6 -4.376455 -0.932231 1.178033  
 6 -4.512498 -1.236990 -1.249471  
 6 -5.707853 -1.339592 1.294078  
 1 -3.786855 -0.660851 2.055321  
 6 -5.842510 -1.638118 -1.115505  
 1 -4.029089 -1.199925 -2.227246  
 6 -6.437542 -1.687887 0.151611  
 1 -6.175361 -1.386730 2.280470  
 1 -6.415840 -1.916019 -2.003073  
 1 -7.479310 -2.003762 0.248923  
 7 -2.380470 1.243593 -0.879857  
 9 -0.758749 1.629755 -1.180827  
 6 -2.711341 2.227361 0.139975  
 6 -2.772826 3.621822 -0.466143  
 1 -1.996487 2.183107 0.980015  
 1 -3.703042 1.934357 0.535355  
 1 -3.074656 4.350042 0.302673  
 1 -1.785757 3.912392 -0.852945  
 1 -3.500293 3.661252 -1.291936

-----  
**Structure S93. <sup>2</sup>INT17**  
 -----

6 1.826640 3.526125 2.250152  
 6 1.355199 2.677682 1.246435  
 6 2.071194 2.535743 0.044482  
 6 3.256305 3.259783 -0.135658  
 6 3.734210 4.102932 0.874390  
 6 3.020033 4.237637 2.068138  
 1 1.264155 3.631429 3.181760  
 1 0.430695 2.113938 1.395665  
 1 3.811055 3.161792 -1.072768  
 1 4.663923 4.658098 0.724489  
 1 3.390384 4.897504 2.857320  
 6 1.556239 1.617211 -1.034363

|    |           |           |           |                                        |           |           |           |
|----|-----------|-----------|-----------|----------------------------------------|-----------|-----------|-----------|
| 6  | 1.354024  | 0.152673  | -0.638778 | 1                                      | -1.473262 | 2.969491  | 0.290173  |
| 1  | 2.204399  | 1.659155  | -1.923529 | 1                                      | -3.209319 | 3.291331  | 0.222062  |
| 1  | 0.768505  | 0.086340  | 0.291604  | 1                                      | -1.948788 | 5.179880  | -0.814434 |
| 1  | 0.740698  | -0.277334 | -1.437624 | 1                                      | -1.178432 | 4.057764  | -1.971136 |
| 7  | 2.604023  | -0.599806 | -0.543217 | 1                                      | -2.938845 | 4.367168  | -2.063012 |
| 16 | 2.546008  | -2.162962 | -1.171713 | -----                                  |           |           |           |
| 6  | 3.443523  | -0.427398 | 0.662339  | <b>Structure S94. OTf</b>              |           |           |           |
| 8  | 3.908122  | -2.704155 | -1.085720 | -----                                  |           |           |           |
| 8  | 1.851565  | -2.090085 | -2.461306 | 16                                     | 0.922097  | 0.000193  | 0.000000  |
| 6  | 1.510793  | -3.091700 | -0.029821 | 8                                      | 1.244660  | -0.722206 | 1.251375  |
| 6  | 4.872379  | -0.022326 | 0.329093  | 8                                      | 1.244663  | -0.723151 | -1.250828 |
| 1  | 3.437372  | -1.351592 | 1.266645  | 8                                      | 1.245876  | 1.444803  | -0.000545 |
| 1  | 2.961043  | 0.340697  | 1.282160  | 6                                      | -0.955040 | 0.000409  | -0.000001 |
| 6  | 2.114188  | -3.924222 | 0.918742  | 9                                      | -1.440294 | -1.251436 | 0.000455  |
| 6  | 0.122077  | -2.911473 | -0.070407 | 9                                      | -1.441236 | 0.626051  | 1.083510  |
| 1  | 5.453300  | 0.124432  | 1.254594  | 9                                      | -1.441237 | 0.625262  | -1.083966 |
| 1  | 5.359408  | -0.802247 | -0.273058 | -----                                  |           |           |           |
| 1  | 4.889197  | 0.919849  | -0.239648 | <b>Structure S95. <sup>1</sup>TS27</b> |           |           |           |
| 6  | 1.306917  | -4.584595 | 1.850123  | -----                                  |           |           |           |
| 1  | 3.197268  | -4.055816 | 0.915466  | 6                                      | 4.022746  | -0.527805 | 0.088086  |
| 6  | -0.669385 | -3.570264 | 0.872984  | 6                                      | 3.095193  | -1.578149 | 0.070454  |
| 1  | -0.342639 | -2.262874 | -0.813084 | 6                                      | 1.729367  | -1.317532 | -0.096634 |
| 6  | -0.080460 | -4.404410 | 1.830938  | 6                                      | 1.258875  | -0.010794 | -0.257166 |
| 1  | 1.765643  | -5.242184 | 2.592829  | 6                                      | 2.193398  | 1.038913  | -0.250418 |
| 1  | -1.752797 | -3.426480 | 0.855675  | 6                                      | 3.555901  | 0.801850  | -0.082187 |
| 1  | -0.706382 | -4.918604 | 2.564888  | 1                                      | 3.427370  | -2.608770 | 0.193348  |
| 16 | -2.262255 | 0.410552  | -0.319557 | 1                                      | 1.025249  | -2.153379 | -0.102654 |
| 8  | -1.522772 | 0.606540  | 0.943465  | 1                                      | 1.876056  | 2.076723  | -0.380040 |
| 8  | -1.721459 | -0.487953 | -1.350781 | 8                                      | 4.412847  | 1.865348  | -0.036068 |
| 6  | -3.929242 | -0.093475 | 0.071200  | 8                                      | 5.356883  | -0.676009 | 0.267994  |
| 6  | -4.412438 | 0.095208  | 1.370748  | 6                                      | 5.331135  | 1.992255  | -1.120142 |
| 6  | -4.713781 | -0.659046 | -0.942206 | 1                                      | 4.795080  | 2.079659  | -2.082347 |
| 6  | -5.720553 | -0.299045 | 1.659646  | 1                                      | 5.902510  | 2.914383  | -0.944768 |
| 1  | -3.768861 | 0.531795  | 2.136307  | 1                                      | 6.025016  | 1.138388  | -1.167984 |
| 6  | -6.019733 | -1.044414 | -0.636498 | 6                                      | 5.893077  | -1.977069 | 0.436094  |
| 1  | -4.303100 | -0.797929 | -1.943902 | 1                                      | 5.699876  | -2.613885 | -0.444903 |
| 6  | -6.520576 | -0.864142 | 0.659187  | 1                                      | 6.976734  | -1.852863 | 0.558608  |
| 1  | -6.115206 | -0.167516 | 2.669934  | 1                                      | 5.482976  | -2.472055 | 1.333678  |
| 1  | -6.648086 | -1.490056 | -1.411265 | 6                                      | -0.222702 | 0.275920  | -0.400302 |
| 1  | -7.544155 | -1.168570 | 0.891711  | 1                                      | -0.394870 | 1.083059  | -1.126901 |
| 7  | -2.606597 | 1.873368  | -1.125336 | 1                                      | -0.763434 | -0.613387 | -0.745519 |
| 9  | 0.276828  | 2.074263  | -1.426609 | 6                                      | -0.779483 | 0.716690  | 0.935309  |
| 6  | -2.315871 | 3.086405  | -0.412239 | 1                                      | -0.308610 | 1.638691  | 1.300245  |
| 6  | -2.085731 | 4.243615  | -1.377865 | 6                                      | -0.964231 | -0.314272 | 2.005902  |

1 0.038836 -0.674649 2.282380  
 1 -1.432951 0.116955 2.900690  
 1 -1.549336 -1.165663 1.633738  
 16 -3.692660 -0.727673 -0.879989  
 8 -5.133532 -1.014858 -0.941050  
 8 -3.112070 0.037689 -1.986241  
 8 -2.844227 -1.758260 -0.263436  
 6 -3.789640 0.596923 0.511646  
 9 -4.419639 1.683882 0.262529  
 9 -3.959070 0.210918 1.724868  
 9 -2.187841 1.320389 0.623581

-----  
**Structure S96. CF<sub>2</sub>SO<sub>3</sub>**  
 -----

16 0.872151 -0.000040 0.013103  
 8 0.836972 -0.000495 1.482331  
 8 1.184808 -1.253981 -0.658425  
 8 1.183765 1.254597 -0.657658  
 6 -1.126365 -0.000255 -0.107021  
 9 -1.824952 -1.047797 -0.049932  
 9 -1.824002 1.047930 -0.049791

-----  
**Structure S97. PF<sub>6</sub><sup>-</sup>**  
 -----

15 0.000000 0.000000 0.000000  
 9 0.000000 0.000000 1.637608  
 9 0.000000 1.637608 0.000000  
 9 -1.637608 0.000000 0.000000  
 9 0.000000 0.000000 -1.637608  
 9 0.000000 -1.637608 0.000000  
 9 1.637608 0.000000 0.000000

-----  
**Structure S98. <sup>1</sup>TS28**  
 -----

6 4.019184 -0.440271 -0.074735  
 6 3.203293 -1.496563 -0.514342  
 6 1.827358 -1.315696 -0.658518  
 6 1.237733 -0.071928 -0.391823  
 6 2.054518 0.986106 0.051876  
 6 3.426819 0.822697 0.206160  
 1 3.637094 -2.469998 -0.740468  
 1 1.210974 -2.152964 -0.993421  
 1 1.632248 1.967563 0.278250  
 8 4.169354 1.862841 0.677630

8 5.347236 -0.528541 0.121604  
 6 5.109368 2.447459 -0.225375  
 1 4.599897 2.830555 -1.127230  
 1 5.575248 3.287589 0.307228  
 1 5.887846 1.728456 -0.523643  
 6 6.019148 -1.753955 -0.135820  
 1 5.920533 -2.052725 -1.193226  
 1 7.077535 -1.577653 0.092711  
 1 5.638514 -2.563894 0.509091  
 6 -0.272048 0.125287 -0.535414  
 1 -0.524243 1.155774 -0.811712  
 1 -0.719948 -0.579451 -1.244009  
 6 -0.649218 -0.171872 0.853172  
 1 -0.424259 0.608133 1.587619  
 6 -0.873059 -1.528961 1.383677  
 1 0.057652 -1.856011 1.880127  
 1 -1.642889 -1.482487 2.167786  
 1 -1.161819 -2.243536 0.605077  
 15 -3.857386 0.126235 -0.123762  
 9 -2.992495 -1.156255 -0.663062  
 9 -2.539079 0.516780 0.913245  
 9 -4.448636 -0.795671 1.075133  
 9 -4.623216 1.422158 0.473865  
 9 -5.091165 -0.239197 -1.099710  
 9 -3.155952 1.054287 -1.264444

-----  
**Structure S99. PF<sub>5</sub>**  
 -----

15 -0.000318 -0.000558 0.000003  
 9 -1.603006 -0.003228 -0.000692  
 9 0.001620 -1.574386 0.077700  
 9 1.603366 -0.000794 0.001760  
 9 -0.002237 0.857485 1.321166  
 9 0.000786 0.721853 -1.399940

-----  
**Structure S100. Co<sup>II</sup>(salen)(diox)<sub>2</sub>**  
 -----

8 -0.539386 -1.458814 -0.338894  
 8 1.501585 0.193033 0.198013  
 7 -2.194858 0.731844 -0.648594  
 7 -0.259741 2.323746 0.114635  
 6 -1.603143 -2.179002 -0.461647  
 6 -1.526170 -3.615714 -0.280030  
 6 -2.676751 -4.367877 -0.487850

|   |           |           |           |    |           |           |           |
|---|-----------|-----------|-----------|----|-----------|-----------|-----------|
| 1 | -2.636991 | -5.450633 | -0.364917 | 1  | -1.067292 | -6.059000 | 1.095021  |
| 6 | -3.919393 | -3.802777 | -0.850946 | 1  | 0.645134  | -6.202100 | 0.653127  |
| 6 | -4.016494 | -2.434699 | -0.988528 | 6  | 4.153316  | -0.863485 | 0.575285  |
| 1 | -4.972806 | -1.970536 | -1.250605 | 6  | 5.658050  | -1.109005 | 0.786355  |
| 6 | -2.887155 | -1.603034 | -0.784299 | 1  | 6.023015  | -0.683771 | 1.735302  |
| 6 | -3.077845 | -0.180194 | -0.903052 | 1  | 6.267067  | -0.694334 | -0.033000 |
| 1 | -4.079791 | 0.128313  | -1.231165 | 1  | 5.851609  | -2.193225 | 0.818506  |
| 6 | -2.450485 | 2.160712  | -0.869348 | 6  | 3.398371  | -1.526005 | 1.750713  |
| 1 | -2.016193 | 2.395797  | -1.858530 | 1  | 2.314624  | -1.441936 | 1.614695  |
| 6 | -1.602688 | 2.912933  | 0.173851  | 1  | 3.672792  | -1.055075 | 2.709424  |
| 1 | -2.006549 | 2.634352  | 1.165637  | 1  | 3.655157  | -2.596593 | 1.815485  |
| 6 | -1.707985 | 4.429078  | 0.002895  | 6  | 3.745304  | -1.552573 | -0.745258 |
| 1 | -1.244191 | 4.717124  | -0.957574 | 1  | 4.291694  | -1.128559 | -1.603070 |
| 1 | -1.149620 | 4.946224  | 0.798927  | 1  | 2.671717  | -1.437236 | -0.922056 |
| 6 | -3.174323 | 4.878164  | 0.030802  | 1  | 3.972766  | -2.630482 | -0.701900 |
| 1 | -3.593064 | 4.686127  | 1.035269  | 1  | 5.335771  | 3.719115  | 0.766872  |
| 1 | -3.234323 | 5.966857  | -0.129747 | 1  | -4.787811 | -4.446585 | -1.007533 |
| 6 | -4.010280 | 4.136099  | -1.014702 | 27 | -0.367072 | 0.441141  | -0.166561 |
| 1 | -3.655456 | 4.408916  | -2.025029 | 6  | -1.905769 | -0.608549 | 2.557677  |
| 1 | -5.065155 | 4.450403  | -0.958592 | 6  | -2.412607 | -0.175844 | 3.923910  |
| 6 | -3.910995 | 2.615568  | -0.841576 | 6  | -0.349260 | 0.827178  | 4.385945  |
| 1 | -4.485528 | 2.117902  | -1.638100 | 6  | 0.173417  | 0.404648  | 3.022815  |
| 1 | -4.363939 | 2.313560  | 0.119832  | 1  | -2.943312 | 0.795448  | 3.827309  |
| 6 | 0.818223  | 3.010472  | 0.318236  | 1  | -3.123545 | -0.917164 | 4.322026  |
| 1 | 0.736335  | 4.096119  | 0.464191  | 1  | -1.479931 | -1.625734 | 2.610203  |
| 6 | 2.158998  | 2.487824  | 0.391891  | 1  | -2.712146 | -0.607554 | 1.812863  |
| 6 | 3.213431  | 3.423191  | 0.540744  | 1  | -0.755098 | 1.859120  | 4.319230  |
| 1 | 2.971870  | 4.490851  | 0.559825  | 1  | 0.465772  | 0.826335  | 5.126927  |
| 6 | 4.519805  | 3.000919  | 0.659390  | 1  | 0.877432  | 1.142006  | 2.616379  |
| 6 | 4.793017  | 1.615413  | 0.658273  | 1  | 0.690422  | -0.569108 | 3.093836  |
| 1 | 5.834052  | 1.312438  | 0.773160  | 8  | -0.911634 | 0.306771  | 2.100802  |
| 6 | 3.810573  | 0.640122  | 0.526791  | 8  | -1.347225 | -0.066224 | 4.851551  |
| 6 | 2.434395  | 1.070085  | 0.358394  | 6  | -0.303210 | -0.299445 | -3.362701 |
| 6 | -0.195919 | -4.264753 | 0.151712  | 6  | 0.976364  | -1.105971 | -3.494402 |
| 6 | 0.253834  | -3.668845 | 1.506340  | 6  | 2.255450  | 0.833859  | -3.225381 |
| 1 | -0.475908 | -3.904955 | 2.298579  | 6  | 0.986881  | 1.657465  | -3.073407 |
| 1 | 0.363503  | -2.580130 | 1.438366  | 1  | 1.253686  | -1.488403 | -2.497322 |
| 1 | 1.225013  | -4.093605 | 1.809667  | 1  | 0.827001  | -1.963120 | -4.169547 |
| 6 | 0.893095  | -4.002604 | -0.911448 | 1  | -0.662695 | 0.017148  | -4.361821 |
| 1 | 1.079032  | -2.929719 | -1.015022 | 1  | -1.089210 | -0.883882 | -2.867085 |
| 1 | 0.590898  | -4.403972 | -1.893030 | 1  | 2.610435  | 0.534932  | -2.224905 |
| 1 | 1.838434  | -4.491264 | -0.622407 | 1  | 3.044612  | 1.429632  | -3.710469 |
| 6 | -0.323085 | -5.788140 | 0.328740  | 1  | 1.137985  | 2.485742  | -2.367074 |
| 1 | -0.596299 | -6.295747 | -0.610525 | 1  | 0.682649  | 2.074415  | -4.054131 |

|                                                        |           |           |           |   |           |           |           |
|--------------------------------------------------------|-----------|-----------|-----------|---|-----------|-----------|-----------|
| 8                                                      | -0.072648 | 0.855562  | -2.555961 | 6 | -1.321747 | -3.723774 | -0.297673 |
| 8                                                      | 2.022524  | -0.309784 | -4.033981 | 6 | -0.261073 | -2.754614 | -0.140782 |
| -----                                                  |           |           |           |   |           |           |           |
| <b>Structure S101. (diox)Co<sup>III</sup>(salen)-F</b> |           |           |           |   |           |           |           |
| -----                                                  |           |           |           |   |           |           |           |
| 27                                                     | 0.511041  | -0.015132 | -0.347697 | 6 | -3.733435 | 2.041481  | 0.060310  |
| 8                                                      | -1.081476 | 1.030694  | -0.345433 | 6 | -3.390793 | 1.459834  | 1.451877  |
| 8                                                      | -0.559784 | -1.516066 | 0.085096  | 1 | -3.189310 | 2.266609  | 2.176568  |
| 7                                                      | 1.612283  | 1.457928  | -0.880088 | 1 | -2.515069 | 0.802845  | 1.399908  |
| 7                                                      | 2.128151  | -1.015893 | -0.190895 | 1 | -4.238199 | 0.868827  | 1.836865  |
| 6                                                      | -1.248323 | 2.273557  | -0.648290 | 6 | -4.029138 | 0.888700  | -0.922919 |
| 6                                                      | -2.555379 | 2.877830  | -0.478531 | 1 | -3.152732 | 0.245215  | -1.045253 |
| 6                                                      | -2.708302 | 4.212370  | -0.834980 | 1 | -4.312712 | 1.281900  | -1.912999 |
| 1                                                      | -3.685182 | 4.683590  | -0.724996 | 1 | -4.864239 | 0.271757  | -0.551579 |
| 6                                                      | -1.660104 | 5.010904  | -1.344908 | 6 | -5.016329 | 2.878408  | 0.212654  |
| 6                                                      | -0.408539 | 4.456148  | -1.487051 | 1 | -5.365101 | 3.287051  | -0.749140 |
| 1                                                      | 0.424599  | 5.053116  | -1.870550 | 1 | -4.888344 | 3.716493  | 0.917298  |
| 6                                                      | -0.172712 | 3.103715  | -1.129679 | 1 | -5.824477 | 2.241121  | 0.605766  |
| 6                                                      | 1.168728  | 2.612551  | -1.258506 | 6 | -2.773395 | -3.241575 | -0.473615 |
| 1                                                      | 1.881710  | 3.319965  | -1.703711 | 6 | -3.757738 | -4.414365 | -0.632820 |
| 6                                                      | 2.976455  | 0.998779  | -1.170657 | 1 | -3.785259 | -5.059434 | 0.260982  |
| 1                                                      | 2.936439  | 0.519352  | -2.165676 | 1 | -3.523909 | -5.044711 | -1.505407 |
| 6                                                      | 3.279727  | -0.115958 | -0.152861 | 1 | -4.775302 | -4.019377 | -0.782766 |
| 1                                                      | 3.264828  | 0.356630  | 0.846953  | 6 | -3.242899 | -2.405991 | 0.739512  |
| 6                                                      | 4.654810  | -0.739330 | -0.387068 | 1 | -2.645593 | -1.495458 | 0.849697  |
| 1                                                      | 4.657207  | -1.255958 | -1.362942 | 1 | -3.163160 | -2.992622 | 1.670772  |
| 1                                                      | 4.867494  | -1.498105 | 0.382522  | 1 | -4.299709 | -2.116874 | 0.616029  |
| 6                                                      | 5.742581  | 0.341848  | -0.367890 | 6 | -2.827170 | -2.395860 | -1.769755 |
| 1                                                      | 5.802776  | 0.779376  | 0.645024  | 1 | -2.593584 | -3.025674 | -2.643870 |
| 1                                                      | 6.724588  | -0.115215 | -0.569941 | 1 | -2.103742 | -1.569835 | -1.749457 |
| 6                                                      | 5.449509  | 1.449669  | -1.383035 | 1 | -3.835962 | -1.976968 | -1.916938 |
| 1                                                      | 5.494980  | 1.029406  | -2.403589 | 9 | 0.384313  | -0.448197 | -2.088798 |
| 1                                                      | 6.222964  | 2.233155  | -1.332195 | 1 | -1.849068 | 6.051842  | -1.615933 |
| 6                                                      | 4.066071  | 2.073659  | -1.160026 | 1 | 0.575112  | -6.595191 | -0.419565 |
| 1                                                      | 3.874656  | 2.825444  | -1.940749 | 6 | 1.067918  | 1.988970  | 3.475560  |
| 1                                                      | 4.037222  | 2.600474  | -0.189290 | 6 | 0.401717  | 1.738631  | 2.134601  |
| 6                                                      | 2.206360  | -2.304689 | -0.186935 | 6 | 0.422061  | -0.595913 | 2.602335  |
| 1                                                      | 3.201586  | -2.768283 | -0.163308 | 6 | 1.083297  | -0.292177 | 3.934979  |
| 6                                                      | 1.099751  | -3.218234 | -0.204127 | 1 | -0.693341 | 1.794986  | 2.222017  |
| 6                                                      | 1.385630  | -4.603528 | -0.294937 | 1 | 0.738754  | 2.464316  | 1.387274  |
| 1                                                      | 2.430471  | -4.928122 | -0.322769 | 1 | 2.169290  | 2.035367  | 3.341334  |
| 6                                                      | 0.363551  | -5.525537 | -0.355727 | 1 | 0.730703  | 2.957311  | 3.877124  |
| 6                                                      | -0.972571 | -5.067536 | -0.375085 | 1 | -0.674820 | -0.640198 | 2.697400  |
| 1                                                      | -1.757548 | -5.817824 | -0.475729 | 1 | 0.776714  | -1.547538 | 2.192338  |
|                                                        |           |           |           | 1 | 0.759196  | -1.032881 | 4.682414  |
|                                                        |           |           |           | 1 | 2.185639  | -0.370991 | 3.826463  |
|                                                        |           |           |           | 8 | 0.725343  | 0.989477  | 4.415052  |

8 0.766960 0.431563 1.650744

**Optimized geometries calculated by  
M06 functional.**

-----  
**Structure S102. Co<sup>II</sup>(salen)**  
-----

27 -0.000010 0.896016 -0.000104  
8 -1.289624 -0.458411 0.116772  
8 1.289623 -0.458402 -0.116890  
7 -1.263420 2.268346 -0.190468  
7 1.263376 2.268376 0.190198  
6 -2.575056 -0.381509 0.058164  
6 -3.375438 -1.574617 0.182492  
6 -4.752161 -1.449029 0.103550  
1 -5.363767 -2.352449 0.191678  
6 -5.435869 -0.224383 -0.085763  
6 -4.668609 0.911739 -0.195020  
1 -5.150750 1.887439 -0.338829  
6 -3.255719 0.862178 -0.126833  
6 -2.547169 2.098065 -0.240384  
1 -3.188707 2.981179 -0.389063  
6 2.547117 2.098089 0.240327  
1 3.188636 2.981209 0.389045  
6 3.255681 0.862198 0.126930  
6 4.668562 0.911768 0.195306  
1 5.150676 1.887470 0.339191  
6 5.435846 -0.224344 0.086123  
6 4.752173 -1.448990 -0.103319  
1 5.363801 -2.352400 -0.191395  
6 3.375462 -1.574592 -0.182437  
6 2.575049 -0.381494 -0.058161  
6 -2.702736 -2.931873 0.402283  
6 -1.943118 -2.918174 1.734131  
1 -2.638951 -2.754220 2.575394  
1 -1.180010 -2.127476 1.752512  
1 -1.438620 -3.887088 1.896961  
6 -1.740193 -3.240458 -0.751153  
1 -0.920194 -2.509536 -0.799379  
1 -2.276442 -3.234465 -1.716464  
1 -1.302224 -4.245953 -0.618767  
6 -3.719515 -4.069757 0.465625  
1 -4.294248 -4.167341 -0.471348  
1 -4.434485 -3.948115 1.296998

1 -3.189732 -5.023293 0.627455  
6 2.702815 -2.931858 -0.402352  
6 3.719629 -4.069712 -0.465649  
1 4.294150 -4.167441 0.471438  
1 4.434786 -3.947913 -1.296839  
1 3.189903 -5.023232 -0.627755  
6 1.740177 -3.240528 0.750978  
1 0.920191 -2.509595 0.799197  
1 2.276348 -3.234625 1.716334  
1 1.302204 -4.246005 0.618472  
6 1.943320 -2.918126 -1.734270  
1 2.639221 -2.754088 -2.575460  
1 1.180173 -2.127467 -1.752677  
1 1.438893 -3.887060 -1.897201  
6 0.652936 3.600357 0.427073  
6 -0.652980 3.600285 -0.427560  
6 1.580348 4.747443 0.047078  
1 1.033857 5.702195 0.050565  
1 2.396496 4.858729 0.777623  
1 2.029303 4.613119 -0.948937  
6 0.334336 3.689554 1.919737  
1 1.252645 3.511247 2.501875  
1 -0.042158 4.688871 2.187904  
1 -0.413276 2.939663 2.223621  
6 -1.580384 4.747443 -0.047774  
1 -2.029311 4.613331 0.948282  
1 -1.033894 5.702194 -0.051475  
1 -2.396554 4.858572 -0.778320  
6 -0.334378 3.689215 -1.920241  
1 -1.252686 3.510800 -2.502346  
1 0.042117 4.688486 -2.188585  
1 0.413238 2.939272 -2.223988  
6 6.944909 -0.183786 0.165054  
6 7.594926 -0.674534 -1.124140  
6 7.469472 -0.959811 1.368596  
1 7.226006 0.878662 0.300911  
1 7.242924 -0.101905 -1.997497  
1 8.692904 -0.583126 -1.075269  
1 7.363724 -1.738401 -1.308530  
1 7.028133 -0.592568 2.309285  
1 7.229534 -2.034451 1.285872  
1 8.566145 -0.875062 1.449209  
6 -6.944944 -0.183830 -0.164471  
6 -7.594762 -0.674553 1.124834

6 -7.469696 -0.959875 -1.367917  
 1 -7.226063 0.878616 -0.300304  
 1 -7.242633 -0.101899 1.998123  
 1 -8.692749 -0.583157 1.076128  
 1 -7.363519 -1.738413 1.309214  
 1 -7.028495 -0.592658 -2.308681  
 1 -7.229762 -2.034517 -1.285208  
 1 -8.566380 -0.875115 -1.448367

-----  
**Structure S103. [Me<sub>3</sub>NFPy]<sup>+</sup>**  
 -----

6 0.375158 -1.216215 -0.001768  
 6 -1.008347 -1.203158 -0.010857  
 6 -1.726896 -0.000448 -0.012455  
 6 -1.008816 1.202600 -0.010841  
 6 0.374624 1.216285 -0.001743  
 1 -1.528786 -2.163950 -0.018967  
 1 -1.529738 2.163128 -0.018966  
 6 -3.212744 -0.000389 0.008970  
 1 -3.564200 0.006021 1.055002  
 1 -3.624003 0.894513 -0.477820  
 1 -3.624372 -0.900577 -0.467509  
 6 1.230480 2.423981 -0.000383  
 1 1.886258 2.438171 -0.884623  
 1 0.603627 3.322540 -0.003392  
 1 1.880846 2.440131 0.887731  
 6 1.231483 -2.423572 -0.000372  
 1 1.887501 -2.437397 -0.884436  
 1 1.881625 -2.439565 0.887915  
 1 0.604975 -3.322370 -0.003634  
 7 0.971885 0.000139 0.003631  
 9 2.310380 0.000431 0.008886

-----  
**Structure S104. <sup>2</sup>TS1**  
 -----

27 0.249146 1.210968 -0.451598  
 8 -0.977155 0.095339 -1.321182  
 8 1.523871 -0.075167 -0.851113  
 7 -0.974815 2.631213 -0.274103  
 7 1.465719 2.337953 0.433266  
 6 -2.261217 0.165212 -1.262043  
 6 -3.056438 -1.015540 -1.481301  
 6 -4.433643 -0.874644 -1.508438  
 1 -5.045075 -1.766093 -1.679703

6 -5.118756 0.349636 -1.311524  
 6 -4.356870 1.461731 -1.039927  
 1 -4.841652 2.425723 -0.840915  
 6 -2.943954 1.389400 -0.978024  
 6 -2.234209 2.558835 -0.580582  
 1 -2.845868 3.471703 -0.501712  
 6 2.730297 2.097082 0.572601  
 1 3.340042 2.816634 1.140517  
 6 3.456027 0.978653 0.055772  
 6 4.849627 0.934880 0.290250  
 1 5.310651 1.746520 0.866651  
 6 5.624456 -0.095810 -0.191361  
 6 4.972878 -1.098759 -0.945264  
 1 5.594367 -1.906731 -1.342752  
 6 3.612957 -1.120620 -1.213550  
 6 2.808945 -0.058153 -0.677609  
 6 -2.376664 -2.381833 -1.598656  
 6 -1.614062 -2.664574 -0.295646  
 1 -2.314377 -2.714577 0.559781  
 1 -0.862461 -1.884138 -0.097988  
 1 -1.094513 -3.637133 -0.356819  
 6 -1.412687 -2.414486 -2.790068  
 1 -0.597575 -1.686742 -2.670932  
 1 -1.949114 -2.193449 -3.729069  
 1 -0.966667 -3.420263 -2.887100  
 6 -3.389921 -3.507042 -1.791103  
 1 -3.967519 -3.390350 -2.723680  
 1 -4.101720 -3.578265 -0.951179  
 1 -2.857908 -4.470728 -1.852150  
 6 2.976531 -2.220453 -2.067994  
 6 4.013835 -3.228440 -2.557752  
 1 4.507887 -3.756966 -1.724745  
 1 4.794339 -2.757040 -3.178467  
 1 3.516099 -3.990234 -3.179987  
 6 1.930418 -2.992104 -1.256092  
 1 1.086406 -2.347066 -0.972614  
 1 2.378511 -3.420319 -0.341586  
 1 1.527944 -3.828347 -1.854768  
 6 2.317364 -1.595141 -3.303896  
 1 3.066663 -1.069538 -3.920661  
 1 1.529065 -0.880716 -3.024134  
 1 1.859997 -2.383047 -3.927864  
 6 0.829246 3.528913 1.058539  
 6 -0.326151 3.918974 0.083224





|   |           |           |           |   |           |           |           |
|---|-----------|-----------|-----------|---|-----------|-----------|-----------|
| 7 | -1.214663 | 2.198138  | -0.468163 | 6 | 1.918220  | -2.701070 | -2.039910 |
| 7 | 1.235968  | 2.240628  | 0.300558  | 1 | 2.596712  | -2.404935 | -2.859012 |
| 6 | -2.541988 | -0.422522 | -0.126229 | 1 | 1.123368  | -1.946053 | -1.951596 |
| 6 | -3.336466 | -1.594881 | 0.127178  | 1 | 1.452194  | -3.662057 | -2.321030 |
| 6 | -4.713539 | -1.457022 | 0.122180  | 6 | 0.583578  | 3.573986  | 0.349716  |
| 1 | -5.324882 | -2.344886 | 0.312316  | 6 | -0.538027 | 3.488217  | -0.739912 |
| 6 | -5.397771 | -0.236861 | -0.100982 | 6 | 1.561468  | 4.705312  | 0.069998  |
| 6 | -4.632336 | 0.885661  | -0.310642 | 1 | 1.019903  | 5.658735  | -0.014889 |
| 1 | -5.114322 | 1.857623  | -0.473945 | 1 | 2.270341  | 4.826198  | 0.903861  |
| 6 | -3.217773 | 0.823438  | -0.313167 | 1 | 2.139119  | 4.556300  | -0.855024 |
| 6 | -2.497508 | 2.030939  | -0.544081 | 6 | -0.002152 | 3.751956  | 1.749630  |
| 1 | -3.122535 | 2.900729  | -0.801406 | 1 | 0.808864  | 3.664243  | 2.490201  |
| 6 | 2.513400  | 2.073372  | 0.365202  | 1 | -0.451226 | 4.750749  | 1.860983  |
| 1 | 3.146208  | 2.963636  | 0.503889  | 1 | -0.742181 | 2.974485  | 1.984019  |
| 6 | 3.233201  | 0.842687  | 0.236142  | 6 | -1.491754 | 4.670660  | -0.675645 |
| 6 | 4.636161  | 0.877307  | 0.398102  | 1 | -2.074254 | 4.693645  | 0.257900  |
| 1 | 5.110017  | 1.827684  | 0.673574  | 1 | -0.933288 | 5.614741  | -0.755087 |
| 6 | 5.405045  | -0.251042 | 0.217810  | 1 | -2.195548 | 4.654984  | -1.522461 |
| 6 | 4.735020  | -1.438794 | -0.152784 | 6 | 0.053147  | 3.392546  | -2.145865 |
| 1 | 5.347634  | -2.333751 | -0.299469 | 1 | -0.750877 | 3.168180  | -2.864496 |
| 6 | 3.364434  | -1.541356 | -0.339155 | 1 | 0.517811  | 4.342871  | -2.449946 |
| 6 | 2.572004  | -0.364003 | -0.129468 | 1 | 0.806042  | 2.591289  | -2.221070 |
| 6 | -2.648533 | -2.927681 | 0.425877  | 6 | 6.905147  | -0.232565 | 0.402710  |
| 6 | -1.790382 | -2.774152 | 1.689608  | 6 | 7.640353  | -0.581532 | -0.886710 |
| 1 | -2.432776 | -2.572053 | 2.564290  | 6 | 7.343304  | -1.142570 | 1.545272  |
| 1 | -1.067509 | -1.949325 | 1.601878  | 1 | 7.176865  | 0.805432  | 0.675509  |
| 1 | -1.235930 | -3.708360 | 1.888647  | 1 | 7.347976  | 0.086724  | -1.712769 |
| 6 | -1.783613 | -3.364514 | -0.763088 | 1 | 8.731988  | -0.502157 | -0.752996 |
| 1 | -0.971256 | -2.650925 | -0.960909 | 1 | 7.424944  | -1.617095 | -1.203216 |
| 1 | -2.398125 | -3.460833 | -1.675449 | 1 | 6.836814  | -0.880104 | 2.488066  |
| 1 | -1.331489 | -4.351268 | -0.557949 | 1 | 7.111708  | -2.199529 | 1.325703  |
| 6 | -3.659457 | -4.041766 | 0.687435  | 1 | 8.431327  | -1.073933 | 1.710805  |
| 1 | -4.298037 | -4.239832 | -0.190574 | 6 | -6.908221 | -0.185568 | -0.091791 |
| 1 | -4.313950 | -3.820175 | 1.547397  | 6 | -7.480386 | -0.579672 | 1.265665  |
| 1 | -3.120417 | -4.975415 | 0.918989  | 6 | -7.508282 | -1.037002 | -1.205556 |
| 6 | 2.692252  | -2.861232 | -0.724988 | 1 | -7.189635 | 0.867895  | -0.283358 |
| 6 | 3.713542  | -3.978500 | -0.925433 | 1 | -7.070817 | 0.047025  | 2.074225  |
| 1 | 4.283381  | -4.194086 | -0.005722 | 1 | -8.578321 | -0.477997 | 1.276596  |
| 1 | 4.432271  | -3.747208 | -1.730158 | 1 | -7.247457 | -1.631271 | 1.508484  |
| 1 | 3.188828  | -4.905710 | -1.209247 | 1 | -7.121635 | -0.740771 | -2.194061 |
| 6 | 1.738337  | -3.296315 | 0.394193  | 1 | -7.273165 | -2.106283 | -1.062459 |
| 1 | 0.930663  | -2.565274 | 0.548073  | 1 | -8.606884 | -0.944383 | -1.226354 |
| 1 | 2.285067  | -3.422387 | 1.344897  | 9 | -0.364467 | 0.715956  | 1.964789  |
| 1 | 1.275713  | -4.266900 | 0.140716  |   |           |           |           |

---

**Structure S107. [Me<sub>3</sub>MPy]<sup>+</sup>**

-----  
6 0.705408 -1.213092 0.001142  
6 -0.695182 -1.208752 -0.008732  
6 -1.406664 -0.001985 -0.011133  
6 -0.698439 1.206729 -0.008542  
6 0.702083 1.214930 0.001378  
1 -1.206024 -2.176767 -0.017752  
1 -1.212042 2.173278 -0.017105  
6 -2.896759 -0.003665 0.005018  
1 -3.254108 -0.000157 1.048484  
1 -3.306310 0.890543 -0.484255  
1 -3.304545 -0.902046 -0.477962  
6 1.561361 2.429329 -0.000474  
1 2.208672 2.438375 -0.889776  
1 0.934628 3.328371 -0.001162  
1 2.210326 2.439882 0.887480  
6 1.567945 -2.425191 -0.000661  
1 2.221715 -2.428464 -0.885211  
1 2.210448 -2.438204 0.892001  
1 0.943503 -3.325787 -0.009647  
7 1.216460 0.001594 0.012417  
-----

**Structure S108. [Co<sup>IV</sup>(salen)-F]<sup>+</sup>**

-----  
27 0.018844 0.824622 -0.081091  
8 1.268746 -0.580513 0.282279  
8 -1.286980 -0.395789 0.325717  
7 1.239984 2.191674 0.571376  
7 -1.186757 2.243330 -0.287657  
6 2.519298 -0.493003 0.202751  
6 3.305550 -1.704030 -0.030385  
6 4.685089 -1.585602 -0.038146  
1 5.290244 -2.477302 -0.210290  
6 5.357495 -0.364827 0.151625  
6 4.587915 0.807047 0.347606  
1 5.106457 1.760326 0.501915  
6 3.210613 0.776334 0.360441  
6 2.509129 2.022123 0.599314  
1 3.164348 2.880460 0.815741  
6 -2.467143 2.090745 -0.385545  
1 -3.075903 2.991780 -0.550364  
6 -3.208000 0.877138 -0.266213  
6 -4.604754 0.925898 -0.469155  
-----

1 -5.062372 1.877510 -0.763613  
6 -5.384409 -0.197377 -0.303524  
6 -4.734727 -1.389085 0.089636  
1 -5.358769 -2.277843 0.221829  
6 -3.370568 -1.505633 0.314881  
6 -2.572480 -0.333621 0.125651  
6 2.596143 -3.017131 -0.317800  
6 1.761051 -2.852008 -1.599475  
1 2.416970 -2.650096 -2.462974  
1 1.029089 -2.033984 -1.528725  
1 1.216868 -3.789683 -1.802538  
6 1.706061 -3.417405 0.869460  
1 0.872955 -2.719192 1.027567  
1 2.297636 -3.481406 1.798450  
1 1.278493 -4.415881 0.677010  
6 3.591802 -4.150351 -0.552756  
1 4.215341 -4.347856 0.335245  
1 4.255418 -3.954634 -1.411040  
1 3.036391 -5.074810 -0.775781  
6 -2.722386 -2.832111 0.716625  
6 -3.761345 -3.937008 0.893564  
1 -4.311931 -4.146582 -0.038796  
1 -4.494283 -3.697631 1.682565  
1 -3.253250 -4.869612 1.188403  
6 -1.754164 -3.275927 -0.386247  
1 -0.943547 -2.547728 -0.536979  
1 -2.287028 -3.406195 -1.343711  
1 -1.296888 -4.245356 -0.120688  
6 -1.976381 -2.682869 2.048813  
1 -2.669287 -2.380306 2.852799  
1 -1.168676 -1.938732 1.987700  
1 -1.529899 -3.650413 2.337452  
6 -0.512055 3.573396 -0.319723  
6 0.562204 3.488138 0.818296  
6 -1.491512 4.711678 -0.079182  
1 -0.942751 5.659420 0.018691  
1 -2.166502 4.834746 -0.939897  
1 -2.101637 4.573110 0.825921  
6 0.127830 3.743629 -1.695577  
1 -0.652828 3.650540 -2.466813  
1 0.575123 4.744133 -1.792705  
1 0.882635 2.972480 -1.901552  
6 1.526579 4.659979 0.801707  
1 2.124964 4.707941 -0.120667

1 0.973012 5.604655 0.899213  
 1 2.212291 4.613813 1.662333  
 6 -0.082364 3.373730 2.199211  
 1 0.693311 3.152318 2.948277  
 1 -0.561079 4.321909 2.485023  
 1 -0.835483 2.570820 2.242028  
 6 -6.877004 -0.172503 -0.535435  
 6 -7.652706 -0.550432 0.721399  
 6 -7.271948 -1.058452 -1.712332  
 1 -7.139239 0.870946 -0.794591  
 1 -7.384656 0.095055 1.573232  
 1 -8.738255 -0.460341 0.553075  
 1 -7.455012 -1.595394 1.017309  
 1 -6.737020 -0.771965 -2.631984  
 1 -7.042747 -2.118994 -1.508767  
 1 -8.354106 -0.989280 -1.910421  
 6 6.851236 -0.245812 0.080802  
 6 7.237946 0.260722 -1.314004  
 6 7.600486 -1.521241 0.424015  
 1 7.134779 0.539622 0.808425  
 1 6.750817 1.217622 -1.559042  
 1 8.327920 0.406363 -1.373212  
 1 6.947327 -0.475246 -2.082647  
 1 7.285825 -1.939856 1.392988  
 1 7.460074 -2.296800 -0.347693  
 1 8.680514 -1.316788 0.477509  
 9 0.538216 0.708908 -1.841951

-----  
**Structure S109. Me<sub>3</sub>MPy**  
 -----

6 0.702809 -1.151447 0.000777  
 6 -0.694030 -1.192345 -0.009534  
 6 -1.422452 -0.000923 -0.011461  
 6 -0.695463 1.191428 -0.009402  
 6 0.701379 1.152237 0.000889  
 1 -1.213908 -2.156777 -0.018715  
 1 -1.216527 2.155227 -0.018500  
 6 -2.917338 -0.001594 0.008399  
 1 -3.290542 0.004478 1.046703  
 1 -3.329094 0.889778 -0.488281  
 1 -3.328360 -0.898939 -0.477953  
 6 1.514413 2.409244 0.001784  
 1 2.168298 2.442336 -0.884647  
 1 0.886511 3.311552 0.008209

1 2.177237 2.434805 0.881634  
 6 1.517326 -2.407493 0.001852  
 1 2.173381 -2.438560 -0.883027  
 1 2.178051 -2.433529 0.883282  
 1 0.890468 -3.310542 0.005643  
 7 1.380661 0.000791 0.006547

-----  
**Structure S110. [Co<sup>III</sup>(salen)]<sup>+</sup>**  
 -----

27 0.000013 0.916161 0.000005  
 8 -1.273729 -0.423541 0.029060  
 8 1.273744 -0.423554 -0.029058  
 7 -1.263682 2.275855 -0.193747  
 7 1.263719 2.275846 0.193754  
 6 -2.559014 -0.369670 0.023560  
 6 -3.330159 -1.575099 0.198510  
 6 -4.706033 -1.465120 0.121296  
 1 -5.308364 -2.370151 0.240072  
 6 -5.403198 -0.250929 -0.098958  
 6 -4.659406 0.903450 -0.227292  
 1 -5.159352 1.866881 -0.379531  
 6 -3.252501 0.871719 -0.160521  
 6 -2.547290 2.104095 -0.277596  
 1 -3.179835 2.986311 -0.455292  
 6 2.547325 2.104077 0.277601  
 1 3.179877 2.986289 0.455294  
 6 3.252527 0.871696 0.160520  
 6 4.659434 0.903415 0.227280  
 1 5.159389 1.866842 0.379515  
 6 5.403213 -0.250970 0.098937  
 6 4.706035 -1.465155 -0.121312  
 1 5.308356 -2.370190 -0.240088  
 6 3.330157 -1.575120 -0.198513  
 6 2.559030 -0.369686 -0.023557  
 6 -2.636618 -2.908036 0.475755  
 6 -1.838135 -2.801355 1.781846  
 1 -2.508391 -2.575767 2.628947  
 1 -1.066355 -2.019179 1.730749  
 1 -1.337234 -3.761237 1.995838  
 6 -1.711553 -3.276274 -0.690058  
 1 -0.901214 -2.544926 -0.817809  
 1 -2.280119 -3.341365 -1.633702  
 1 -1.252973 -4.263547 -0.506180  
 6 -3.643217 -4.043794 0.642744

1 -4.239954 -4.209738 -0.269973  
 1 -4.335442 -3.869710 1.483555  
 1 -3.100992 -4.979694 0.853711  
 6 2.636561 -2.908034 -0.475740  
 6 3.643077 -4.043856 -0.642811  
 1 4.239874 -4.209846 0.269858  
 1 4.335248 -3.869816 -1.483676  
 1 3.100775 -4.979721 -0.853739  
 6 1.711541 -3.276230 0.690118  
 1 0.901272 -2.544816 0.817946  
 1 2.280166 -3.341397 1.633721  
 1 1.252864 -4.263458 0.506239  
 6 1.837997 -2.801282 -1.781775  
 1 2.508213 -2.575733 -2.628917  
 1 1.066279 -2.019047 -1.730619  
 1 1.337008 -3.761123 -1.995744  
 6 0.646130 3.610106 0.435497  
 6 -0.646083 3.610112 -0.435483  
 6 1.582396 4.752076 0.067437  
 1 1.036050 5.706300 0.067487  
 1 2.387798 4.862237 0.809276  
 1 2.040436 4.619258 -0.924223  
 6 0.314550 3.686066 1.926096  
 1 1.228318 3.512874 2.516120  
 1 -0.068061 4.683141 2.191395  
 1 -0.433051 2.933597 2.225754  
 6 -1.582340 4.752090 -0.067424  
 1 -2.040386 4.619275 0.924233  
 1 -1.035984 5.706310 -0.067469  
 1 -2.387737 4.862261 -0.809267  
 6 -0.314498 3.686074 -1.926080  
 1 -1.228265 3.512893 -2.516108  
 1 0.068124 4.683147 -2.191373  
 1 0.433098 2.933600 -2.225737  
 6 6.909296 -0.237357 0.184404  
 6 7.552577 -0.742427 -1.102753  
 6 7.401768 -1.027534 1.393047  
 1 7.209920 0.818212 0.323617  
 1 7.213753 -0.167021 -1.979062  
 1 8.650199 -0.662628 -1.045416  
 1 7.311792 -1.804236 -1.283859  
 1 6.958837 -0.653412 2.329861  
 1 7.145415 -2.097408 1.304075  
 1 8.498134 -0.959597 1.482312

6 -6.909279 -0.237301 -0.184436  
 6 -7.552576 -0.742365 1.102715  
 6 -7.401752 -1.027470 -1.393084  
 1 -7.209892 0.818272 -0.323650  
 1 -7.213752 -0.166962 1.979028  
 1 -8.650197 -0.662554 1.045370  
 1 -7.311803 -1.804177 1.283823  
 1 -6.958808 -0.653353 -2.329894  
 1 -7.145414 -2.097348 -1.304111  
 1 -8.498117 -0.959519 -1.482358

---

**Structure S111. HF**

---

9 0.000000 0.000000 0.092128  
 1 0.000000 0.000000 -0.829150

---

**Structure S112. <sup>1</sup>INT2**

---

6 -0.195418 1.162773 0.048096  
 6 1.197499 1.194697 0.005752  
 6 1.921857 -0.000003 -0.018727  
 6 1.197477 -1.194699 0.005754  
 6 -0.195432 -1.162755 0.048093  
 1 1.717882 2.158084 -0.012211  
 1 1.717848 -2.158092 -0.012205  
 6 3.413100 -0.000039 -0.101088  
 1 3.845144 -0.894558 0.371376  
 1 3.739157 -0.000647 -1.155147  
 1 3.845155 0.894992 0.370387  
 6 -1.017075 -2.409863 0.095799  
 1 -1.999663 -2.235491 -0.365385  
 1 -0.515563 -3.249926 -0.405530  
 1 -1.198513 -2.710374 1.141881  
 6 -1.017024 2.409906 0.095794  
 1 -1.999717 2.235483 -0.365143  
 1 -1.198205 2.710593 1.141870  
 1 -0.515604 3.249877 -0.405783  
 7 -0.861321 0.000018 0.066044  
 1 -2.462480 0.000008 -0.055320  
 9 -3.419567 -0.000019 -0.198660

---

**Structure S113. R<sub>3</sub>Si<sup>+</sup>**

---

8 0.104659 -0.731652 0.343662

|    |           |           |           |    |           |           |           |
|----|-----------|-----------|-----------|----|-----------|-----------|-----------|
| 14 | 1.457735  | -0.114852 | -0.421497 | 8  | -2.272169 | -0.253633 | 0.805343  |
| 14 | -1.549552 | -0.543217 | 0.211299  | 14 | -1.137078 | 0.983065  | 0.938504  |
| 1  | -2.160533 | -1.833099 | 0.645267  | 14 | -3.068410 | -0.985445 | -0.459481 |
| 6  | 1.397047  | 1.766961  | -0.350933 | 1  | -2.183726 | -1.980470 | -1.142292 |
| 1  | 2.303859  | 2.204409  | -0.799028 | 6  | -1.894554 | 2.622123  | 0.398917  |
| 1  | 0.524394  | 2.175343  | -0.886438 | 1  | -1.279303 | 3.464389  | 0.760210  |
| 1  | 1.339194  | 2.096192  | 0.702987  | 1  | -1.971459 | 2.691407  | -0.696567 |
| 6  | 2.956617  | -0.758067 | 0.506162  | 1  | -2.905304 | 2.735054  | 0.833094  |
| 1  | 2.999088  | -1.858179 | 0.499853  | 6  | -0.905718 | 1.097786  | 2.826179  |
| 1  | 3.886992  | -0.373457 | 0.058804  | 1  | -0.500222 | 0.160184  | 3.241669  |
| 1  | 2.911710  | -0.420982 | 1.557408  | 1  | -0.211079 | 1.913739  | 3.088512  |
| 6  | -1.986411 | -0.181720 | -1.570835 | 1  | -1.875293 | 1.296728  | 3.321559  |
| 1  | -1.552439 | 0.781288  | -1.891666 | 6  | -3.748723 | 0.243659  | -1.693386 |
| 1  | -1.600473 | -0.968027 | -2.240511 | 1  | -4.381795 | 0.993729  | -1.189358 |
| 1  | -3.077974 | -0.119793 | -1.712485 | 1  | -2.914466 | 0.760342  | -2.190928 |
| 6  | -2.107970 | 0.837909  | 1.338307  | 1  | -4.364871 | -0.263784 | -2.454647 |
| 1  | -3.206905 | 0.927832  | 1.334730  | 6  | -4.484769 | -1.935484 | 0.322295  |
| 1  | -1.785287 | 0.659619  | 2.376634  | 1  | -5.052776 | -2.496939 | -0.438701 |
| 1  | -1.689149 | 1.804537  | 1.011709  | 1  | -4.119885 | -2.656655 | 1.071991  |
|    |           |           |           | 1  | -5.184477 | -1.248846 | 0.828041  |

---

**Structure S114. <sup>2</sup>TS6**

---

|   |           |           |           |
|---|-----------|-----------|-----------|
| 6 | 1.890484  | -1.290188 | -0.128175 |
| 6 | 3.197330  | -1.526055 | 0.272433  |
| 6 | 4.170339  | -0.528615 | 0.128908  |
| 6 | 3.776475  | 0.703078  | -0.406092 |
| 6 | 2.458978  | 0.906215  | -0.792543 |
| 1 | 3.457059  | -2.496021 | 0.706248  |
| 1 | 4.498308  | 1.517535  | -0.515685 |
| 6 | 5.586979  | -0.780424 | 0.520742  |
| 1 | 6.131641  | -1.255087 | -0.313299 |
| 1 | 6.113710  | 0.153037  | 0.765333  |
| 1 | 5.652813  | -1.465453 | 1.378668  |
| 6 | 1.920352  | 2.194389  | -1.300578 |
| 1 | 1.325138  | 2.043358  | -2.213207 |
| 1 | 1.226363  | 2.613157  | -0.546894 |
| 1 | 2.719179  | 2.921903  | -1.493050 |
| 6 | 0.777085  | -2.262604 | 0.019899  |
| 1 | -0.013604 | -1.830306 | 0.661972  |
| 1 | 0.302357  | -2.467908 | -0.952993 |
| 1 | 1.121205  | -3.207924 | 0.458539  |
| 7 | 1.570186  | -0.094070 | -0.655507 |
| 1 | 0.488814  | 0.113609  | -0.985923 |
| 9 | -0.720110 | 0.449868  | -1.283821 |

---

**Structure S115. R<sub>3</sub>Si-F**

---

|    |           |           |           |
|----|-----------|-----------|-----------|
| 9  | 1.688985  | -0.921634 | -1.348060 |
| 8  | -0.166882 | -0.345401 | 0.420943  |
| 14 | 1.399495  | -0.046731 | 0.006819  |
| 14 | -1.657214 | 0.003297  | -0.262832 |
| 1  | -1.440581 | 0.203146  | -1.731425 |
| 6  | 1.634182  | 1.731913  | -0.459403 |
| 1  | 2.668618  | 1.930026  | -0.782209 |
| 1  | 0.963115  | 2.007502  | -1.290415 |
| 1  | 1.411881  | 2.394340  | 0.393004  |
| 6  | 2.516913  | -0.675448 | 1.337330  |
| 1  | 2.328599  | -1.742885 | 1.531962  |
| 1  | 3.574784  | -0.556089 | 1.055454  |
| 1  | 2.349115  | -0.122830 | 2.275342  |
| 6  | -2.313875 | 1.572505  | 0.503625  |
| 1  | -2.437779 | 1.448666  | 1.592088  |
| 1  | -1.627885 | 2.418051  | 0.332066  |
| 1  | -3.294875 | 1.840216  | 0.078079  |
| 6  | -2.784476 | -1.446415 | 0.044672  |
| 1  | -3.780606 | -1.268879 | -0.392308 |
| 1  | -2.376310 | -2.369216 | -0.396891 |
| 1  | -2.912282 | -1.611381 | 1.127083  |

-----  
**Structure S116. Me<sub>3</sub>NHPy**  
-----

6 -0.623102 1.232249 -0.000117  
6 0.742269 1.195633 -0.011519  
6 1.471570 -0.033408 -0.019522  
6 0.695318 -1.225965 -0.010275  
6 -0.673527 -1.209690 0.000396  
1 1.280873 2.150521 -0.019205  
1 1.195283 -2.201816 -0.016222  
6 2.963691 -0.051941 0.015921  
1 3.375727 0.161064 1.023020  
1 3.362491 -1.034182 -0.286117  
1 3.401876 0.705702 -0.658396  
6 -1.550870 -2.408086 0.002182  
1 -2.212350 -2.428619 -0.884035  
1 -0.956258 -3.332159 0.006474  
1 -2.214702 -2.423296 0.886909  
6 -1.451670 2.465577 0.002846  
1 -2.112789 2.509632 -0.882304  
1 -2.112595 2.504742 0.888556  
1 -0.821666 3.365706 0.006029  
7 -1.327114 0.026902 -0.002087  
1 -2.338173 0.048169 0.070430  
-----

-----  
**Structure S117. <sup>1</sup>TS8**  
-----

27 0.105361 1.103309 -0.271428  
8 -1.191038 -0.208598 -0.706319  
8 1.390498 -0.252157 -0.592377  
7 -1.123245 2.511122 -0.285539  
7 1.385961 2.410319 0.100698  
6 -2.466448 -0.088604 -0.811485  
6 -3.301193 -1.253762 -1.004267  
6 -4.672474 -1.076797 -1.081965  
1 -5.305825 -1.960061 -1.213099  
6 -5.322791 0.178020 -1.013272  
6 -4.523307 1.289201 -0.869441  
1 -4.978751 2.287486 -0.822537  
6 -3.117873 1.186613 -0.757629  
6 -2.384930 2.400775 -0.569346  
1 -2.989692 3.318069 -0.661714  
6 2.668930 2.262410 -0.011210  
1 3.325313 3.120051 0.205267

6 3.364326 1.060035 -0.362850  
6 4.777005 1.114193 -0.386340  
1 5.265121 2.073869 -0.169483  
6 5.543524 0.003738 -0.659044  
6 4.854014 -1.201903 -0.927077  
1 5.460656 -2.086464 -1.146539  
6 3.475096 -1.330186 -0.929767  
6 2.672838 -0.165342 -0.632005  
6 -2.669136 -2.642287 -1.127081  
6 -1.930847 -2.997596 0.166846  
1 -2.641807 -3.054499 1.010678  
1 -1.163630 -2.247749 0.411957  
1 -1.440213 -3.983735 0.073616  
6 -1.695023 -2.658993 -2.309274  
1 -0.898690 -1.913386 -2.174868  
1 -2.225630 -2.441529 -3.253005  
1 -1.228528 -3.655834 -2.407049  
6 -3.709099 -3.732835 -1.373567  
1 -4.273484 -3.567803 -2.307261  
1 -4.432851 -3.817183 -0.544936  
1 -3.200279 -4.707344 -1.463905  
6 2.797025 -2.663172 -1.251617  
6 3.806173 -3.777445 -1.519984  
1 4.452576 -3.974161 -0.647469  
1 4.454137 -3.556760 -2.385250  
1 3.265355 -4.711943 -1.745814  
6 1.922624 -3.114721 -0.075527  
1 1.164515 -2.359007 0.179205  
1 2.545804 -3.299882 0.818591  
1 1.408249 -4.060878 -0.323071  
6 1.946726 -2.498723 -2.515549  
1 2.584352 -2.231239 -3.376269  
1 1.189610 -1.713002 -2.383330  
1 1.428683 -3.443572 -2.758869  
6 0.806827 3.679022 0.601141  
6 -0.513528 3.863993 -0.208934  
6 1.738591 4.874071 0.436140  
1 1.200545 5.810143 0.649422  
1 2.573852 4.827311 1.152418  
1 2.162097 4.949085 -0.576861  
6 0.531514 3.493393 2.095172  
1 1.458647 3.167335 2.595816  
1 0.214232 4.438208 2.563484  
1 -0.235768 2.728710 2.284806

6 -1.440559 4.876103 0.456976  
 1 -1.891924 4.476395 1.378721  
 1 -0.894792 5.797742 0.710725  
 1 -2.256965 5.178840 -0.216371  
 6 -0.217051 4.312067 -1.639959  
 1 -1.141137 4.274096 -2.238543  
 1 0.155879 5.347596 -1.670620  
 1 0.524930 3.654055 -2.120183  
 6 7.054350 0.055323 -0.672844  
 6 7.624307 -0.283692 -2.046191  
 6 7.662733 -0.838717 0.402674  
 1 7.337246 1.100622 -0.440372  
 1 7.212189 0.375043 -2.827742  
 1 8.722717 -0.183084 -2.058127  
 1 7.388395 -1.324288 -2.330434  
 1 7.281895 -0.580694 1.404281  
 1 7.423873 -1.901229 0.219855  
 1 8.762054 -0.749575 0.421357  
 6 -6.828793 0.278869 -1.094539  
 6 -7.502769 -0.405978 0.090100  
 6 -7.371284 -0.259945 -2.413878  
 1 -7.076567 1.357216 -1.044580  
 1 -7.139493 -0.001046 1.048931  
 1 -8.597887 -0.277505 0.057166  
 1 -7.299814 -1.491478 0.089743  
 1 -6.907690 0.244631 -3.277072  
 1 -7.174168 -1.341578 -2.515725  
 1 -8.463288 -0.120137 -2.482064  
 6 -1.509011 -0.383921 2.722740  
 6 -1.793523 -1.633658 3.258447  
 6 -0.765401 -2.548418 3.501794  
 6 0.541500 -2.128357 3.247026  
 6 0.782761 -0.858251 2.731356  
 1 -2.834148 -1.898238 3.475015  
 1 1.388998 -2.788493 3.460009  
 6 -1.061718 -3.927581 3.986429  
 1 -1.304656 -4.582479 3.131164  
 1 -0.200697 -4.373819 4.504997  
 1 -1.932577 -3.942804 4.658919  
 6 2.162030 -0.329218 2.549590  
 1 2.160266 0.503660 1.837228  
 1 2.544600 0.050294 3.512394  
 1 2.858144 -1.104980 2.195143  
 6 -2.569670 0.636090 2.492522

1 -2.266400 1.328812 1.696977  
 1 -3.530502 0.172415 2.220763  
 1 -2.726296 1.230666 3.409118  
 7 -0.239298 -0.031343 2.442284  
 1 -0.063936 0.718225 1.275548

---

**Structure S118. 1**

---

6 1.307803 0.572633 -0.062735  
 6 0.271933 1.457538 0.246031  
 6 -1.038407 0.995102 0.371716  
 6 -1.352790 -0.353236 0.200253  
 6 -0.308731 -1.233808 -0.103148  
 6 1.003457 -0.793822 -0.236535  
 1 0.477894 2.521681 0.383033  
 1 -1.836609 1.708142 0.606107  
 1 -0.499812 -2.302509 -0.251178  
 8 1.975795 -1.685802 -0.572715  
 8 2.600339 0.927035 -0.226882  
 6 2.884678 -2.006777 0.457428  
 1 2.357618 -2.422128 1.336375  
 1 3.572239 -2.769792 0.067233  
 1 3.471782 -1.129156 0.776532  
 6 2.950638 2.277350 -0.075311  
 1 2.726665 2.648209 0.941097  
 1 4.032054 2.351346 -0.246990  
 1 2.430552 2.919784 -0.808325  
 6 -2.773181 -0.840729 0.350281  
 1 -2.805522 -1.916465 0.099415  
 1 -3.094303 -0.759215 1.405917  
 6 -3.738457 -0.091488 -0.513853  
 6 -4.781468 0.606749 -0.064672  
 1 -3.535466 -0.124553 -1.594169  
 1 -5.453374 1.141792 -0.742665  
 1 -5.005638 0.665927 1.007675

---

**Structure S119. <sup>3</sup>TS9**

---

27 1.428242 1.235976 -0.029690  
 8 2.193768 -0.484411 -0.321431  
 8 -0.133349 1.013394 1.110036  
 7 3.268064 2.118063 -0.127283  
 7 0.873232 3.141577 -0.356599  
 6 3.401085 -0.893596 -0.109362

|   |           |           |           |   |           |           |           |
|---|-----------|-----------|-----------|---|-----------|-----------|-----------|
| 6 | 3.682651  | -2.306376 | -0.094341 | 1 | -1.375154 | -0.226863 | 4.623235  |
| 6 | 4.982120  | -2.716311 | 0.161023  | 6 | 1.945953  | 4.009274  | -0.875699 |
| 1 | 5.196416  | -3.789459 | 0.186935  | 6 | 3.241001  | 3.590702  | -0.085406 |
| 6 | 6.062905  | -1.836384 | 0.388906  | 6 | 1.617842  | 5.485952  | -0.686069 |
| 6 | 5.791975  | -0.486296 | 0.345317  | 1 | 2.496704  | 6.115255  | -0.891698 |
| 1 | 6.603744  | 0.235685  | 0.505016  | 1 | 0.834863  | 5.809855  | -1.389366 |
| 6 | 4.491645  | 0.011815  | 0.102521  | 1 | 1.267233  | 5.704449  | 0.334407  |
| 6 | 4.350863  | 1.446981  | 0.068360  | 6 | 2.108750  | 3.720526  | -2.367836 |
| 1 | 5.302771  | 1.988072  | 0.232037  | 1 | 1.141235  | 3.857361  | -2.878644 |
| 6 | -0.372531 | 3.466885  | -0.406846 | 1 | 2.828791  | 4.413670  | -2.829862 |
| 1 | -0.664770 | 4.436258  | -0.852576 | 1 | 2.451525  | 2.688944  | -2.547043 |
| 6 | -1.481061 | 2.692391  | 0.096750  | 6 | 4.497076  | 4.202715  | -0.695490 |
| 6 | -2.775791 | 3.178324  | -0.179758 | 1 | 4.741517  | 3.754500  | -1.671009 |
| 1 | -2.876380 | 4.059102  | -0.828694 | 1 | 4.385778  | 5.288965  | -0.831156 |
| 6 | -3.905986 | 2.577457  | 0.336703  | 1 | 5.365649  | 4.062739  | -0.033302 |
| 6 | -3.707643 | 1.504757  | 1.230894  | 6 | 3.132681  | 4.007702  | 1.381304  |
| 1 | -4.596748 | 1.067478  | 1.693157  | 1 | 3.974340  | 3.580761  | 1.950144  |
| 6 | -2.464972 | 0.987237  | 1.573091  | 1 | 3.175891  | 5.102227  | 1.493771  |
| 6 | -1.302319 | 1.534472  | 0.925912  | 1 | 2.195964  | 3.643388  | 1.833552  |
| 6 | 2.565734  | -3.314247 | -0.387297 | 6 | -5.284152 | 3.047493  | -0.074582 |
| 6 | 2.080217  | -3.113825 | -1.828321 | 6 | -6.326410 | 2.937016  | 1.028393  |
| 1 | 2.890259  | -3.330105 | -2.545920 | 6 | -5.748732 | 2.305137  | -1.325771 |
| 1 | 1.740719  | -2.080692 | -1.992903 | 1 | -5.184315 | 4.118790  | -0.339307 |
| 1 | 1.240321  | -3.796818 | -2.051922 | 1 | -5.992996 | 3.418597  | 1.962168  |
| 6 | 1.395580  | -3.140108 | 0.589235  | 1 | -7.272109 | 3.410257  | 0.718244  |
| 1 | 0.940154  | -2.144421 | 0.500494  | 1 | -6.559911 | 1.882644  | 1.258756  |
| 1 | 1.731233  | -3.275672 | 1.632442  | 1 | -5.023282 | 2.415211  | -2.149701 |
| 1 | 0.616482  | -3.898079 | 0.388460  | 1 | -5.856910 | 1.223937  | -1.123822 |
| 6 | 3.048568  | -4.757820 | -0.262992 | 1 | -6.724642 | 2.680981  | -1.677725 |
| 1 | 3.401284  | -4.990874 | 0.756258  | 6 | 7.452682  | -2.365393 | 0.661896  |
| 1 | 3.861561  | -4.991882 | -0.970701 | 6 | 7.994328  | -3.175454 | -0.511106 |
| 1 | 2.213607  | -5.442362 | -0.487822 | 6 | 7.506954  | -3.175081 | 1.953136  |
| 6 | -2.317036 | -0.082514 | 2.663446  | 1 | 8.107525  | -1.481760 | 0.791216  |
| 6 | -3.667923 | -0.509004 | 3.234551  | 1 | 7.984006  | -2.590365 | -1.445002 |
| 1 | -4.304625 | -0.987981 | 2.469903  | 1 | 9.030950  | -3.502127 | -0.323726 |
| 1 | -4.227580 | 0.333253  | 3.675537  | 1 | 7.391302  | -4.084648 | -0.681328 |
| 1 | -3.507759 | -1.250788 | 4.034583  | 1 | 7.146729  | -2.587819 | 2.813326  |
| 6 | -1.631829 | -1.352315 | 2.148452  | 1 | 6.879219  | -4.080818 | 1.882715  |
| 1 | -0.631208 | -1.137511 | 1.749927  | 1 | 8.535823  | -3.506650 | 2.172132  |
| 1 | -2.233967 | -1.831919 | 1.356944  | 1 | 0.722061  | 1.089458  | -1.378103 |
| 1 | -1.525875 | -2.079980 | 2.972311  | 6 | -4.882011 | -3.298799 | -0.750696 |
| 6 | -1.494078 | 0.513688  | 3.812853  | 6 | -3.658406 | -3.959896 | -0.863971 |
| 1 | -1.999516 | 1.399340  | 4.235575  | 6 | -2.490179 | -3.240039 | -1.120978 |
| 1 | -0.492444 | 0.814843  | 3.473007  | 6 | -2.500443 | -1.852344 | -1.251296 |

6 -3.731163 -1.194317 -1.130193  
6 -4.908201 -1.894856 -0.895732  
1 -3.605090 -5.046769 -0.768815  
1 -1.541288 -3.780982 -1.210604  
1 -3.807829 -0.103185 -1.199494  
8 -6.094347 -1.223037 -0.859562  
8 -6.069523 -3.903791 -0.533017  
6 -6.692965 -1.102180 0.410502  
1 -6.039265 -0.536485 1.101743  
1 -7.632464 -0.545314 0.283768  
1 -6.916322 -2.086066 0.855991  
6 -6.093472 -5.298661 -0.382535  
1 -5.485305 -5.629057 0.478706  
1 -7.137975 -5.586361 -0.207454  
1 -5.731289 -5.814562 -1.289809  
6 -1.204502 -1.112137 -1.419771  
1 -0.841260 -0.797214 -0.413170  
1 -0.418787 -1.799904 -1.778250  
6 -1.207131 0.127679 -2.238999  
6 -0.086842 0.591183 -2.839474  
1 -2.101708 0.766402 -2.217373  
1 -0.085572 1.539024 -3.387419  
1 0.785720 -0.060622 -2.974493

---

**Structure S120. 3**

---

6 -1.431334 -0.557436 -0.066505  
6 -0.425775 -1.484915 0.214128  
6 0.906389 -1.077444 0.303971  
6 1.274689 0.255258 0.120506  
6 0.259058 1.178565 -0.154142  
6 -1.073350 0.794939 -0.250184  
1 -0.671451 -2.539702 0.357987  
1 1.682231 -1.821605 0.518398  
1 0.491270 2.237708 -0.312936  
8 -2.016200 1.727121 -0.562323  
8 -2.742525 -0.856269 -0.195917  
6 -2.878356 2.090087 0.493423  
1 -2.307403 2.484095 1.354680  
1 -3.543755 2.881476 0.121611  
1 -3.493136 1.239524 0.833384  
6 -3.144939 -2.190633 -0.035930  
1 -2.911043 -2.572254 0.974336  
1 -4.232543 -2.219426 -0.180172

1 -2.670699 -2.853489 -0.781903  
6 2.713092 0.685966 0.243689  
1 2.813952 1.711368 -0.177115  
1 2.975596 0.809779 1.315676  
6 3.687728 -0.244736 -0.385539  
1 3.393078 -0.721575 -1.330574  
6 5.113304 -0.258115 0.015076  
1 5.635197 -1.165859 -0.326832  
1 5.678286 0.602098 -0.403517  
1 5.227177 -0.188167 1.111945

---

**Structure S121. Co<sup>II</sup>(salen)**

---

27 -0.654199 0.000204 -0.000030  
8 0.685129 -1.303075 0.066638  
8 0.686010 1.302574 -0.066680  
7 -2.024603 -1.259186 -0.259620  
7 -2.023751 1.260522 0.259602  
6 0.605711 -2.585372 -0.015836  
6 1.800169 -3.384361 0.105059  
6 1.677389 -4.759928 -0.000714  
1 2.572675 -5.381410 0.082148  
6 0.449627 -5.418712 -0.211994  
6 -0.695028 -4.670263 -0.316962  
1 -1.667705 -5.149906 -0.476026  
6 -0.642902 -3.259968 -0.221595  
6 -1.872963 -2.544226 -0.330668  
1 -2.764752 -3.170456 -0.495749  
6 -3.318844 -0.607460 -0.459817  
1 -3.321990 -0.212268 -1.500266  
6 -3.318444 0.609676 0.459759  
1 -3.321894 0.214482 1.500206  
6 -4.561144 1.457198 0.264315  
1 -4.546590 1.890004 -0.755673  
1 -4.571528 2.304053 0.970764  
6 -5.810411 0.608191 0.458240  
1 -5.856336 0.269736 1.511369  
1 -6.712286 1.220336 0.293140  
6 -5.810807 -0.604278 -0.458372  
1 -5.856469 -0.265788 -1.511501  
1 -6.713104 -1.215806 -0.293301  
6 -4.562127 -1.454137 -0.264412  
1 -4.573069 -2.300979 -0.970866  
1 -4.547900 -1.886960 0.755574

6 -1.871225 2.545453 0.330722  
 1 -2.762576 3.172294 0.495855  
 6 -0.640670 3.260352 0.221714  
 6 -0.691833 4.670667 0.317246  
 1 -1.664183 5.150952 0.476372  
 6 0.453332 5.418349 0.212357  
 6 1.680642 4.758747 0.000995  
 1 2.576355 5.379620 -0.081826  
 6 1.802480 3.383111 -0.104943  
 6 0.607475 2.584922 0.015863  
 6 3.152180 -2.709809 0.350596  
 6 3.121134 -1.969515 1.692421  
 1 2.947950 -2.674429 2.524536  
 1 2.329241 -1.207642 1.717030  
 1 4.086409 -1.465297 1.876993  
 6 3.472314 -1.730642 -0.784884  
 1 2.745180 -0.907200 -0.829154  
 1 3.471743 -2.247839 -1.760603  
 1 4.478540 -1.297988 -0.641115  
 6 4.290719 -3.724620 0.412521  
 1 4.407115 -4.283095 -0.532417  
 1 4.163423 -4.454751 1.230268  
 1 5.242031 -3.197727 0.596974  
 6 3.154041 2.707731 -0.350677  
 6 4.293190 3.721865 -0.412378  
 1 4.409820 4.280175 0.532630  
 1 4.166413 4.452157 -1.230062  
 1 5.244205 3.194424 -0.596796  
 6 3.473629 1.728062 0.784532  
 1 2.746163 0.904893 0.828456  
 1 3.473169 2.244946 1.760418  
 1 4.479698 1.295050 0.640735  
 6 3.122501 1.967844 -1.692713  
 1 2.949998 2.673142 -2.524645  
 1 2.329959 1.206660 -1.717610  
 1 4.087366 1.462861 -1.877334  
 1 0.424661 6.508512 0.287935  
 1 0.420210 -6.508864 -0.287451

-----  
**Structure S122. 11**  
 -----

6 3.372760 -1.344521 -0.472791  
 6 3.980011 -0.096090 -0.368276  
 6 2.019273 -1.464872 -0.184790

6 1.257950 -0.347526 0.173513  
 6 1.864822 0.918078 0.302291  
 6 3.233402 1.009869 0.026619  
 1 3.953024 -2.223147 -0.767940  
 1 5.046913 0.017490 -0.582688  
 1 1.524985 -2.439442 -0.239088  
 6 -0.171864 -0.631768 0.505217  
 6 1.122044 2.141011 0.745260  
 1 3.724465 1.983021 0.135362  
 8 -0.496333 -1.558507 1.220367  
 7 -1.120246 0.235979 -0.015433  
 9 -0.667369 0.842453 -1.177487  
 6 -2.577199 -0.029086 -0.116638  
 1 0.392904 1.922510 1.540966  
 1 0.556413 2.594134 -0.085458  
 1 1.819036 2.902305 1.126342  
 6 -3.119874 -0.251672 1.290027  
 6 -2.828597 -1.231500 -1.016290  
 6 -3.228629 1.222082 -0.694290  
 1 -2.733392 -1.171278 1.745801  
 1 -4.218653 -0.319535 1.237928  
 1 -2.863415 0.597062 1.945384  
 1 -2.964555 2.115156 -0.104425  
 1 -4.322882 1.102377 -0.660421  
 1 -2.943112 1.400320 -1.741009  
 1 -2.404846 -2.150672 -0.582677  
 1 -2.381513 -1.073287 -2.011582  
 1 -3.911264 -1.386912 -1.153141

-----  
**Structure S123. 2INT5**  
 -----

9 0.753202 -0.032000 1.174192  
 7 0.939194 -0.377642 2.513158  
 6 -0.278923 -1.043642 3.051504  
 6 -0.242720 -0.941145 4.571389  
 1 0.565386 -1.536722 5.013683  
 1 -0.120840 0.107655 4.887629  
 1 -1.205092 -1.303521 4.968010  
 6 -0.324637 -2.491729 2.583765  
 1 0.505996 -3.079344 3.004296  
 1 -1.272472 -2.963435 2.891323  
 1 -0.273428 -2.535151 1.484351  
 6 -1.488444 -0.274404 2.540014  
 1 -2.400823 -0.737403 2.949371

|    |           |           |           |   |           |           |           |
|----|-----------|-----------|-----------|---|-----------|-----------|-----------|
| 1  | -1.456638 | 0.777646  | 2.869556  | 6 | 2.056820  | 0.824168  | -1.980433 |
| 1  | -1.565964 | -0.289596 | 1.442933  | 1 | 3.072066  | 0.710259  | -2.395081 |
| 6  | 2.241247  | -0.796272 | 2.743288  | 6 | 1.687478  | 2.162364  | -1.637296 |
| 8  | 2.503098  | -1.512013 | 3.689448  | 6 | 2.657338  | 3.175468  | -1.814343 |
| 6  | 3.301103  | -0.312922 | 1.805457  | 1 | 3.627183  | 2.901663  | -2.246669 |
| 6  | 3.464139  | 1.028867  | 1.405263  | 6 | 2.392284  | 4.471408  | -1.446212 |
| 6  | 4.230278  | -1.286679 | 1.419684  | 6 | 1.142791  | 4.772411  | -0.867029 |
| 6  | 4.558265  | 1.328144  | 0.583299  | 1 | 0.967407  | 5.806208  | -0.557701 |
| 6  | 5.300733  | -0.966903 | 0.593702  | 6 | 0.146820  | 3.830831  | -0.669145 |
| 6  | 5.459538  | 0.351243  | 0.170461  | 6 | 0.396078  | 2.474792  | -1.096179 |
| 1  | 4.706013  | 2.369371  | 0.275580  | 6 | -5.001542 | 0.291652  | -0.248744 |
| 1  | 6.011721  | -1.740683 | 0.288803  | 6 | -4.845072 | 0.916586  | -1.639784 |
| 1  | 6.301857  | 0.626072  | -0.471833 | 1 | -5.396986 | 0.331707  | -2.396618 |
| 27 | -0.434645 | -0.271113 | -1.151927 | 1 | -3.790731 | 0.969222  | -1.946665 |
| 8  | -2.278158 | -0.338720 | -0.797188 | 1 | -5.254486 | 1.942569  | -1.647477 |
| 8  | -0.528478 | 1.592283  | -0.964906 | 6 | -4.280522 | 1.154242  | 0.793760  |
| 7  | -0.237428 | -2.140355 | -1.076912 | 1 | -3.206916 | 1.248704  | 0.573766  |
| 7  | 1.321677  | -0.231180 | -1.839055 | 1 | -4.397410 | 0.728069  | 1.806321  |
| 6  | -3.040345 | -1.348244 | -0.553722 | 1 | -4.717693 | 2.168702  | 0.811474  |
| 6  | -4.431987 | -1.129912 | -0.251021 | 6 | -6.488407 | 0.306053  | 0.096344  |
| 6  | -5.218152 | -2.235988 | 0.030414  | 1 | -6.689087 | -0.094396 | 1.105139  |
| 1  | -6.274465 | -2.090078 | 0.270873  | 1 | -7.095699 | -0.264148 | -0.627593 |
| 6  | -4.731222 | -3.557826 | 0.026146  | 1 | -6.858767 | 1.344898  | 0.081073  |
| 6  | -3.410207 | -3.778237 | -0.274522 | 6 | -1.168189 | 4.172133  | 0.035378  |
| 1  | -2.999167 | -4.794302 | -0.290101 | 6 | -1.245205 | 5.648231  | 0.414377  |
| 6  | -2.548866 | -2.695311 | -0.563984 | 1 | -1.215998 | 6.310214  | -0.468568 |
| 6  | -1.178566 | -2.997844 | -0.839825 | 1 | -0.434340 | 5.951818  | 1.098609  |
| 1  | -0.921100 | -4.069502 | -0.807392 | 1 | -2.197573 | 5.844878  | 0.935232  |
| 6  | 1.169630  | -2.516497 | -1.202698 | 6 | -2.367505 | 3.867458  | -0.870205 |
| 1  | 1.655081  | -2.251188 | -0.234230 | 1 | -2.435547 | 2.797773  | -1.113510 |
| 6  | 1.763757  | -1.566018 | -2.239534 | 1 | -2.296270 | 4.433235  | -1.815917 |
| 1  | 1.260454  | -1.802269 | -3.203904 | 1 | -3.306449 | 4.170428  | -0.372855 |
| 6  | 3.255692  | -1.773040 | -2.403995 | 6 | -1.258289 | 3.355027  | 1.331491  |
| 1  | 3.759939  | -1.466320 | -1.467424 | 1 | -0.452972 | 3.643814  | 2.031177  |
| 1  | 3.651754  | -1.128034 | -3.206567 | 1 | -1.171360 | 2.275952  | 1.132946  |
| 6  | 3.563830  | -3.231777 | -2.710012 | 1 | -2.221401 | 3.536196  | 1.842224  |
| 1  | 3.140136  | -3.496865 | -3.698192 | 1 | -5.402674 | -4.388609 | 0.258245  |
| 1  | 4.653964  | -3.374599 | -2.795365 | 1 | 3.135199  | 5.261200  | -1.585659 |
| 6  | 2.985177  | -4.157379 | -1.652320 | 6 | 2.546843  | 2.128732  | 1.836706  |
| 1  | 3.470359  | -3.946944 | -0.679194 | 1 | 1.649670  | 2.164848  | 1.196452  |
| 1  | 3.212415  | -5.209984 | -1.888291 | 1 | 2.190560  | 1.999505  | 2.870558  |
| 6  | 1.481180  | -3.967047 | -1.509506 | 1 | 3.042750  | 3.107861  | 1.761342  |
| 1  | 1.092685  | -4.623376 | -0.712026 | 1 | 4.099196  | -2.309155 | 1.788154  |
| 1  | 0.968012  | -4.260922 | -2.446755 |   |           |           |           |

---

**Structure S124. <sup>2</sup>TS16**

-----  
9 0.352246 -0.326901 1.036592  
7 0.623102 -0.531681 2.722565  
6 -0.572932 -1.232478 3.184947  
6 -0.517696 -1.212499 4.716873  
1 0.331412 -1.792603 5.102605  
1 -0.441989 -0.178782 5.091771  
1 -1.452150 -1.648691 5.108105  
6 -0.657608 -2.657182 2.652300  
1 0.128944 -3.298885 3.075840  
1 -1.638921 -3.098861 2.893871  
1 -0.555391 -2.649645 1.555626  
6 -1.785638 -0.423929 2.737948  
1 -2.697780 -0.847664 3.189742  
1 -1.695179 0.629430 3.054792  
1 -1.895653 -0.438473 1.644274  
6 1.895520 -1.050141 2.792977  
8 2.177396 -1.949737 3.571425  
6 2.951251 -0.413243 1.945972  
6 3.017218 0.960433 1.624555  
6 3.980320 -1.276740 1.547952  
6 4.126027 1.398046 0.887626  
6 5.062457 -0.821015 0.805686  
6 5.131648 0.530160 0.472585  
1 4.197712 2.464541 0.646114  
1 5.851122 -1.514289 0.496998  
1 5.980257 0.915794 -0.101512  
27 -0.205868 -0.205133 -0.985630  
8 -2.057269 -0.348047 -0.834377  
8 -0.414762 1.643722 -0.842088  
7 0.032763 -2.067802 -1.108199  
7 1.490640 -0.058980 -1.811588  
6 -2.812906 -1.393684 -0.724710  
6 -4.226698 -1.222998 -0.535140  
6 -4.999390 -2.363807 -0.370332  
1 -6.075106 -2.258253 -0.208625  
6 -4.474365 -3.668347 -0.402481  
6 -3.128973 -3.839777 -0.621389  
1 -2.688759 -4.842167 -0.666216  
6 -2.284644 -2.720475 -0.784040  
6 -0.889916 -2.963951 -1.002440  
1 -0.601492 -4.025913 -1.066478  
6 1.450247 -2.378061 -1.269394

1 1.934888 -2.134235 -0.297404  
6 1.982549 -1.358474 -2.275733  
1 1.474555 -1.574261 -3.241889  
6 3.479701 -1.492700 -2.469538  
1 3.985288 -1.212372 -1.525149  
1 3.836174 -0.796222 -3.247183  
6 3.839690 -2.922304 -2.849984  
1 3.407534 -3.157444 -3.842086  
1 4.932555 -3.015749 -2.961579  
6 3.319267 -3.919603 -1.827708  
1 3.812917 -3.737004 -0.853655  
1 3.583391 -4.949552 -2.118376  
6 1.811687 -3.798320 -1.652273  
1 1.460910 -4.506585 -0.882515  
1 1.297779 -4.065754 -2.597063  
6 2.172913 1.040036 -1.922563  
1 3.181287 0.987032 -2.365001  
6 1.757201 2.341304 -1.521622  
6 2.677614 3.406846 -1.669385  
1 3.662142 3.192508 -2.101561  
6 2.343335 4.674638 -1.268908  
6 1.069998 4.902578 -0.701186  
1 0.840210 5.920964 -0.376984  
6 0.120503 3.911429 -0.532837  
6 0.454985 2.576985 -0.968193  
6 -4.840512 0.180381 -0.534353  
6 -4.571314 0.858413 -1.883101  
1 -5.028079 0.284960 -2.708733  
1 -3.494228 0.953472 -2.084659  
1 -5.011483 1.871347 -1.896536  
6 -4.255681 1.028763 0.600743  
1 -3.169303 1.165319 0.494235  
1 -4.456324 0.566557 1.583398  
1 -4.728128 2.027249 0.603551  
6 -6.353607 0.135182 -0.337841  
1 -6.638916 -0.308310 0.631726  
1 -6.866489 -0.426115 -1.137860  
1 -6.756004 1.161929 -0.354949  
6 -1.236542 4.175121 0.124281  
6 -1.388921 5.637461 0.533340  
1 -1.343830 6.322720 -0.330907  
1 -0.623028 5.952552 1.262856  
1 -2.371565 5.785297 1.011988  
6 -2.369671 3.849206 -0.856013

|   |           |           |           |   |           |           |           |
|---|-----------|-----------|-----------|---|-----------|-----------|-----------|
| 1 | -2.384149 | 2.783363  | -1.125361 | 8 | -2.030130 | -0.367017 | -1.170064 |
| 1 | -2.267562 | 4.439871  | -1.783427 | 8 | -0.419234 | 1.681612  | -1.300013 |
| 1 | -3.346348 | 4.103199  | -0.406599 | 7 | 0.106180  | -2.046466 | -1.052847 |
| 6 | -1.375430 | 3.324782  | 1.395515  | 7 | 1.539341  | -0.101907 | -1.960516 |
| 1 | -0.617378 | 3.614513  | 2.144984  | 6 | -2.761075 | -1.399146 | -0.868317 |
| 1 | -1.264291 | 2.248361  | 1.189918  | 6 | -4.166040 | -1.224349 | -0.644745 |
| 1 | -2.368260 | 3.483166  | 1.853924  | 6 | -4.917081 | -2.352037 | -0.336740 |
| 1 | -5.135966 | -4.527221 | -0.263776 | 1 | -5.988908 | -2.240540 | -0.155404 |
| 1 | 3.047279  | 5.503688  | -1.377954 | 6 | -4.373160 | -3.642812 | -0.230561 |
| 6 | 1.990068  | 1.964257  | 2.041256  | 6 | -3.023978 | -3.813904 | -0.429128 |
| 1 | 1.063787  | 1.839103  | 1.458147  | 1 | -2.560321 | -4.802062 | -0.337803 |
| 1 | 1.696787  | 1.850722  | 3.096478  | 6 | -2.206918 | -2.707563 | -0.738256 |
| 1 | 2.361294  | 2.989607  | 1.888664  | 6 | -0.803339 | -2.941977 | -0.885650 |
| 1 | 3.914740  | -2.327508 | 1.847636  | 1 | -0.490254 | -3.996758 | -0.834048 |

---

**Structure S125. 4INT6**

---

|    |           |           |           |   |           |           |           |
|----|-----------|-----------|-----------|---|-----------|-----------|-----------|
| 9  | 0.271594  | 0.074474  | 0.683053  | 1 | 2.003477  | -1.984265 | -0.246176 |
| 7  | 0.760507  | -0.759579 | 3.372070  | 6 | 2.029184  | -1.434413 | -2.310998 |
| 6  | -0.662481 | -0.990788 | 3.552861  | 1 | 1.499929  | -1.748986 | -3.236793 |
| 6  | -0.789065 | -1.716025 | 4.895422  | 6 | 3.521763  | -1.573614 | -2.526505 |
| 1  | -0.282308 | -2.694310 | 4.855490  | 1 | 4.047817  | -1.199568 | -1.626906 |
| 1  | -0.335561 | -1.125476 | 5.707589  | 1 | 3.849346  | -0.952884 | -3.378154 |
| 1  | -1.852954 | -1.887000 | 5.132499  | 6 | 3.880986  | -3.034074 | -2.763321 |
| 6  | -1.365944 | -1.778756 | 2.453736  | 1 | 3.414066  | -3.378257 | -3.706598 |
| 1  | -0.998945 | -2.813590 | 2.390660  | 1 | 4.969573  | -3.133466 | -2.905593 |
| 1  | -2.451404 | -1.804102 | 2.657239  | 6 | 3.408383  | -3.912474 | -1.615989 |
| 1  | -1.204971 | -1.286134 | 1.485442  | 1 | 3.931877  | -3.614207 | -0.687630 |
| 6  | -1.308868 | 0.394215  | 3.658291  | 1 | 3.676651  | -4.966302 | -1.795703 |
| 1  | -2.360649 | 0.283181  | 3.970033  | 6 | 1.905863  | -3.790292 | -1.400971 |
| 1  | -0.793735 | 1.026836  | 4.399453  | 1 | 1.596555  | -4.390863 | -0.528322 |
| 1  | -1.291462 | 0.900148  | 2.679553  | 1 | 1.366010  | -4.185493 | -2.284997 |
| 6  | 1.569663  | -1.340858 | 2.441623  | 6 | 2.275946  | 0.962981  | -1.958785 |
| 8  | 1.440617  | -2.530985 | 2.159881  | 1 | 3.320139  | 0.876231  | -2.301097 |
| 6  | 2.758565  | -0.560248 | 1.963519  | 6 | 1.881584  | 2.261547  | -1.525643 |
| 6  | 2.880509  | 0.846722  | 2.006087  | 6 | 2.877595  | 3.262053  | -1.456115 |
| 6  | 3.796297  | -1.327795 | 1.421977  | 1 | 3.901242  | 3.006058  | -1.752021 |
| 6  | 4.035044  | 1.416694  | 1.453519  | 6 | 2.564188  | 4.520625  | -1.008468 |
| 6  | 4.944833  | -0.742934 | 0.901187  | 6 | 1.242777  | 4.790519  | -0.601136 |
| 6  | 5.055931  | 0.645395  | 0.905375  | 1 | 1.030107  | 5.791089  | -0.215785 |
| 1  | 4.129149  | 2.508370  | 1.462117  | 6 | 0.220163  | 3.856220  | -0.645303 |
| 1  | 5.747257  | -1.367872 | 0.495440  | 6 | 0.525946  | 2.547896  | -1.158976 |
| 1  | 5.945052  | 1.132592  | 0.492131  | 6 | -4.784601 | 0.174511  | -0.674151 |
| 27 | -0.179419 | -0.168679 | -1.102206 | 6 | -4.581300 | 0.832884  | -2.042761 |
|    |           |           |           | 1 | -5.078350 | 0.249174  | -2.837434 |
|    |           |           |           | 1 | -3.516489 | 0.927084  | -2.299075 |

|   |           |           |           |   |           |           |           |
|---|-----------|-----------|-----------|---|-----------|-----------|-----------|
| 1 | -5.024193 | 1.844666  | -2.046555 | 6 | -0.778359 | 3.231145  | 0.200320  |
| 6 | -4.135154 | 1.025805  | 0.423087  | 6 | -1.964151 | 2.446522  | 0.355620  |
| 1 | -3.060616 | 1.175077  | 0.241400  | 1 | -2.897327 | 3.018780  | 0.482044  |
| 1 | -4.254756 | 0.550099  | 1.413155  | 6 | -3.276155 | 0.400023  | 0.460561  |
| 1 | -4.616970 | 2.018666  | 0.470538  | 1 | -3.208317 | -0.160952 | 1.415990  |
| 6 | -6.286029 | 0.136842  | -0.401892 | 6 | -3.220372 | -0.637790 | -0.666018 |
| 1 | -6.523251 | -0.266865 | 0.597374  | 1 | -3.251704 | -0.069385 | -1.621146 |
| 1 | -6.835656 | -0.455830 | -1.153495 | 6 | -4.412937 | -1.573373 | -0.609942 |
| 1 | -6.690159 | 1.162239  | -0.439987 | 1 | -4.352155 | -2.171011 | 0.320795  |
| 6 | -1.171143 | 4.145285  | -0.079601 | 1 | -4.390966 | -2.285455 | -1.452282 |
| 6 | -1.299701 | 5.585969  | 0.406566  | 6 | -5.711335 | -0.778042 | -0.632431 |
| 1 | -1.176973 | 6.317122  | -0.411678 | 1 | -5.801922 | -0.257504 | -1.605291 |
| 1 | -0.574720 | 5.830590  | 1.201246  | 1 | -6.571499 | -1.464333 | -0.570320 |
| 1 | -2.305391 | 5.739558  | 0.832739  | 6 | -5.758005 | 0.244571  | 0.491520  |
| 6 | -2.264057 | 3.916163  | -1.129897 | 1 | -5.750487 | -0.280424 | 1.465621  |
| 1 | -2.334947 | 2.860719  | -1.428141 | 1 | -6.698385 | 0.818480  | 0.457048  |
| 1 | -2.072686 | 4.518268  | -2.035722 | 6 | -4.567663 | 1.191447  | 0.427302  |
| 1 | -3.244150 | 4.229452  | -0.728569 | 1 | -4.601120 | 1.908817  | 1.265003  |
| 6 | -1.383914 | 3.222148  | 1.127137  | 1 | -4.611043 | 1.782570  | -0.509278 |
| 1 | -0.671300 | 3.471939  | 1.933452  | 6 | -1.684905 | -2.524832 | -0.698472 |
| 1 | -1.233811 | 2.164112  | 0.858370  | 1 | -2.535409 | -3.169990 | -0.973892 |
| 1 | -2.403219 | 3.339060  | 1.537069  | 6 | -0.448491 | -3.205919 | -0.509095 |
| 1 | -5.017767 | -4.489859 | 0.016998  | 6 | -0.447468 | -4.616703 | -0.617169 |
| 1 | 3.325143  | 5.302782  | -0.947573 | 1 | -1.388193 | -5.127042 | -0.852134 |
| 6 | 1.838927  | 1.747677  | 2.583217  | 6 | 0.708818  | -5.326673 | -0.419238 |
| 1 | 0.873828  | 1.576857  | 2.081830  | 6 | 1.890963  | -4.632776 | -0.089175 |
| 1 | 1.691303  | 1.554259  | 3.659046  | 1 | 2.789770  | -5.228172 | 0.091773  |
| 1 | 2.121988  | 2.805080  | 2.457879  | 6 | 1.961641  | -3.255064 | 0.030344  |
| 1 | 3.674633  | -2.415707 | 1.424933  | 6 | 0.763036  | -2.497634 | -0.216450 |

-----  
**Structure S126. Co<sup>III</sup>(salen)-F**  
 -----

|    |           |           |           |   |          |           |           |
|----|-----------|-----------|-----------|---|----------|-----------|-----------|
| 27 | -0.584271 | -0.041840 | 0.176199  | 6 | 3.005343 | 2.830693  | -0.513765 |
| 8  | 0.606150  | 1.337667  | -0.223904 | 6 | 2.986610 | 2.065605  | -1.841987 |
| 8  | 0.821628  | -1.213418 | -0.201745 | 1 | 2.757996 | 2.743772  | -2.682964 |
| 7  | -2.036889 | 1.160051  | 0.352207  | 1 | 2.241860 | 1.257233  | -1.838028 |
| 7  | -1.898180 | -1.254549 | -0.561684 | 1 | 3.976730 | 1.616177  | -2.036270 |
| 6  | 0.478728  | 2.619350  | -0.089773 | 6 | 3.380181 | 1.885533  | 0.634886  |
| 6  | 1.634192  | 3.456039  | -0.244427 | 1 | 2.679071 | 1.042346  | 0.723631  |
| 6  | 1.458924  | 4.826963  | -0.117116 | 1 | 3.394354 | 2.424492  | 1.598307  |
| 1  | 2.324946  | 5.484446  | -0.226055 | 1 | 4.391334 | 1.472225  | 0.471245  |
| 6  | 0.217054  | 5.430292  | 0.151443  | 6 | 4.097850 | 3.892329  | -0.612356 |
| 6  | -0.891340 | 4.633734  | 0.307589  | 1 | 4.206480 | 4.472817  | 0.319935  |
| 1  | -1.873669 | 5.068722  | 0.522386  | 1 | 3.923239 | 4.600394  | -1.440834 |
|    |           |           |           | 1 | 5.067689 | 3.403930  | -0.804830 |
|    |           |           |           | 6 | 3.243273 | -2.530765 | 0.446363  |
|    |           |           |           | 6 | 4.389578 | -3.509078 | 0.689767  |

1 4.670130 -4.065215 -0.221784  
 1 4.157916 -4.239868 1.483424  
 1 5.283586 -2.951727 1.016642  
 6 3.694999 -1.561831 -0.652839  
 1 2.958732 -0.764594 -0.826837  
 1 3.855867 -2.096845 -1.605588  
 1 4.653630 -1.090197 -0.371729  
 6 2.993888 -1.777299 1.760285  
 1 2.792797 -2.488540 2.580287  
 1 2.136400 -1.090708 1.701048  
 1 3.887377 -1.191230 2.040514  
 9 -0.627534 -0.509356 1.944584  
 1 0.145425 6.517435 0.237865  
 1 0.719868 -6.416879 -0.495875

---

**Structure S127. 12**

---

6 3.479962 -1.054772 0.153478  
 6 3.853079 0.287297 0.170712  
 6 2.140855 -1.380459 -0.001343  
 6 1.161439 -0.388643 -0.145964  
 6 1.529486 0.975039 -0.120094  
 6 2.887132 1.279033 0.037882  
 1 4.231094 -1.842554 0.258873  
 1 4.904116 0.566713 0.291383  
 1 1.812464 -2.423216 -0.019086  
 6 -0.236562 -0.890464 -0.299207  
 6 0.551302 2.101947 -0.238907  
 1 3.188620 2.331718 0.058715  
 8 -0.510156 -2.081857 -0.228728  
 7 -1.212255 0.015132 -0.633390  
 6 -2.468392 0.122515 0.091971  
 1 -0.204422 2.074631 0.564838  
 1 -0.001530 2.071774 -1.192277  
 1 1.065521 3.072629 -0.170348  
 6 -2.301094 -0.100423 1.591315  
 6 -3.406663 -0.934586 -0.508885  
 6 -3.043401 1.507532 -0.186018  
 1 -1.938309 -1.116392 1.811481  
 1 -3.264482 0.034388 2.109773  
 1 -1.585361 0.621953 2.021287  
 1 -2.422885 2.301496 0.260552  
 1 -4.056147 1.591875 0.240933  
 1 -3.106636 1.692418 -1.270497

1 -3.021383 -1.948420 -0.332666  
 1 -3.513967 -0.786648 -1.595322  
 1 -4.402504 -0.837538 -0.043731

---

**Structure S128. [Co<sup>IV</sup>(salen)-F]<sup>+</sup>**

---

27 -0.587444 -0.110994 0.203734  
 8 0.375582 1.393303 -0.198515  
 8 1.008789 -1.090678 -0.131210  
 7 -2.186026 0.827337 0.395228  
 7 -1.706680 -1.518067 -0.602430  
 6 0.077344 2.650956 -0.039715  
 6 1.097331 3.636406 -0.226306  
 6 0.731900 4.965511 -0.056204  
 1 1.488741 5.742526 -0.184899  
 6 -0.569743 5.378202 0.278516  
 6 -1.552778 4.434693 0.453156  
 1 -2.576084 4.725222 0.711295  
 6 -1.245098 3.065662 0.303836  
 6 -2.296638 2.114519 0.447091  
 1 -3.303611 2.532527 0.598196  
 6 -3.309194 -0.108562 0.454531  
 1 -3.184787 -0.687936 1.392447  
 6 -3.099716 -1.085306 -0.711838  
 1 -3.168117 -0.484372 -1.643418  
 6 -4.154042 -2.170997 -0.728398  
 1 -4.045270 -2.789381 0.184179  
 1 -4.009103 -2.837580 -1.595681  
 6 -5.543455 -1.548251 -0.764188  
 1 -5.673569 -1.002754 -1.718162  
 1 -6.307321 -2.341824 -0.757359  
 6 -5.750005 -0.592863 0.399480  
 1 -5.701457 -1.153783 1.351801  
 1 -6.754016 -0.141984 0.358376  
 6 -4.694916 0.504576 0.410538  
 1 -4.843551 1.172680 1.275061  
 1 -4.790183 1.123455 -0.503524  
 6 -1.329817 -2.741836 -0.644039  
 1 -2.068869 -3.530992 -0.858849  
 6 0.017964 -3.226775 -0.425225  
 6 0.233283 -4.589489 -0.506834  
 1 -0.605811 -5.256073 -0.726990  
 6 1.518122 -5.121717 -0.315503  
 6 2.604206 -4.286719 -0.037877

1 3.580344 -4.749974 0.115340  
6 2.475756 -2.907108 0.053665  
6 1.143312 -2.339852 -0.160216  
6 2.527544 3.222809 -0.578913  
6 2.544597 2.463022 -1.910311  
1 2.161384 3.095702 -2.729587  
1 1.939369 1.545163 -1.875121  
1 3.579702 2.179384 -2.169121  
6 3.102801 2.349042 0.542432  
1 2.540053 1.412644 0.674266  
1 3.099125 2.890916 1.503788  
1 4.151150 2.087893 0.314935  
6 3.441136 4.435577 -0.731710  
1 3.522090 5.021139 0.199714  
1 3.112274 5.112301 -1.538734  
1 4.458339 4.097401 -0.988912  
6 3.638573 -1.995269 0.404410  
6 4.927541 -2.787795 0.600576  
1 5.241817 -3.312708 -0.317625  
1 4.851891 -3.525338 1.417201  
1 5.739697 -2.094166 0.869887  
6 3.878547 -0.989835 -0.733253  
1 3.053445 -0.274332 -0.851460  
1 4.034553 -1.508579 -1.694800  
1 4.795003 -0.414451 -0.519235  
6 3.330697 -1.267168 1.724039  
1 3.263842 -1.984874 2.558855  
1 2.390709 -0.696880 1.697011  
1 4.150515 -0.565719 1.953279  
9 -0.604475 -0.775876 1.895481  
1 -0.788918 6.441960 0.396030  
1 1.670368 -6.201983 -0.380549

-----  
**Structure S129. 15**  
-----

6 3.413034 -1.251786 -0.177306  
6 3.965253 0.026129 -0.162536  
6 2.035124 -1.394893 -0.060940  
6 1.167852 -0.300658 0.051738  
6 1.728233 0.999756 0.072671  
6 3.121914 1.126049 -0.031435  
1 4.054698 -2.134686 -0.274565  
1 5.048026 0.170824 -0.245985  
1 1.559501 -2.380106 -0.042535

6 -0.318901 -0.649960 0.149676  
6 0.921466 2.253903 0.216084  
1 3.556767 2.133284 -0.006572  
8 -0.586957 -1.843957 0.438590  
7 -1.132356 0.350388 -0.121609  
6 -2.564052 0.102602 -0.096515  
1 0.255703 2.208101 1.091812  
1 0.232479 2.385914 -0.631588  
1 1.580516 3.134830 0.306075  
6 -3.043165 -0.338162 1.290192  
6 -2.982157 -0.939858 -1.138712  
6 -3.238524 1.429635 -0.441440  
1 -2.561693 -1.288354 1.566964  
1 -4.142456 -0.463787 1.325722  
1 -2.762340 0.420516 2.042971  
1 -2.948877 2.205867 0.289537  
1 -4.342372 1.351273 -0.447146  
1 -2.908484 1.779915 -1.435664  
1 -2.514388 -1.909178 -0.908031  
1 -2.640288 -0.624567 -2.141074  
1 -4.081112 -1.067458 -1.176235

-----  
**Structure S130. 2TS17**  
-----

6 3.572333 -0.990796 -0.061064  
6 3.905236 0.364660 -0.064142  
6 2.236424 -1.371774 -0.032791  
6 1.228414 -0.406136 -0.004151  
6 1.558998 0.961578 0.030044  
6 2.907059 1.332893 -0.023340  
1 4.359235 -1.749832 -0.091586  
1 4.955595 0.669739 -0.095200  
1 1.942839 -2.425414 -0.046205  
6 -0.197686 -0.864562 -0.038543  
6 0.467581 1.954677 0.133280  
1 3.169137 2.396171 -0.014558  
8 -0.508592 -2.026774 0.185005  
7 -1.096703 0.089320 -0.427869  
6 -2.508067 0.116362 -0.036819  
1 0.138456 2.177509 1.161709  
1 -0.492669 1.264276 -0.342981  
1 0.589149 2.872725 -0.460848  
6 -2.686290 -0.118897 1.458670  
6 -3.239399 -0.957443 -0.845300

6 -3.050966 1.488037 -0.420551  
1 -2.305840 -1.106975 1.757989  
1 -3.753318 -0.067304 1.732269  
1 -2.152376 0.650283 2.043513  
1 -2.563069 2.291293 0.158415  
1 -4.133001 1.541328 -0.219618  
1 -2.887515 1.689499 -1.492186  
1 -2.867973 -1.960329 -0.592118  
1 -3.094202 -0.794577 -1.925555  
1 -4.320606 -0.911032 -0.629760

---

**Structure S131. 13**

---

6 3.397107 -1.234706 -0.375034  
6 3.943948 0.054885 -0.383709  
6 2.039129 -1.401261 -0.107675  
6 1.203680 -0.314751 0.132888  
6 1.754087 1.011071 0.182048  
6 3.145228 1.146208 -0.107154  
1 4.026861 -2.105027 -0.579579  
1 5.007261 0.198924 -0.597181  
1 1.595778 -2.401328 -0.095409  
6 -0.247351 -0.641660 0.347319  
6 1.030170 2.156126 0.552691  
1 3.578602 2.151730 -0.081548  
8 -0.582041 -1.621819 0.994597  
7 -1.125399 0.192888 -0.268625  
6 -2.593577 0.095573 -0.210535  
1 -0.009282 2.116473 0.887721  
1 -0.735888 0.909663 -0.873847  
1 1.534897 3.127155 0.578525  
6 -3.063661 0.197246 1.236256  
6 -3.064729 -1.209835 -0.842415  
6 -3.130011 1.277379 -1.004624  
1 -2.670584 -0.632973 1.840759  
1 -4.165144 0.170115 1.282941  
1 -2.726954 1.145454 1.689864  
1 -2.790475 2.235660 -0.573809  
1 -4.231561 1.277539 -0.997881  
1 -2.801241 1.235623 -2.057654  
1 -2.677098 -2.077536 -0.288881  
1 -2.718661 -1.283399 -1.887249  
1 -4.166514 -1.261392 -0.843512

**Structure S132. 2TS18**

---

6 3.936052 -2.368855 -0.225796  
6 3.058344 -3.219650 -0.904069  
6 3.680482 -1.000951 -0.185483  
6 2.562107 -0.448633 -0.805446  
6 1.689335 -1.297282 -1.550968  
6 1.957392 -2.690092 -1.552848  
1 4.817762 -2.775104 0.278161  
1 3.246228 -4.296623 -0.934684  
1 4.351320 -0.322135 0.348517  
6 2.395110 1.040013 -0.637809  
6 0.597067 -0.835713 -2.332416  
1 1.281860 -3.346051 -2.112049  
8 3.380052 1.755508 -0.520352  
7 1.118462 1.488398 -0.615387  
6 0.709903 2.900447 -0.558184  
1 0.028361 -1.568475 -2.912638  
1 0.518967 0.207026 -2.645545  
6 1.410262 3.706310 -1.646933  
6 1.012496 3.483534 0.817054  
6 -0.789267 2.908790 -0.823080  
1 2.495429 3.753633 -1.482186  
1 1.012836 4.734893 -1.663977  
1 1.231267 3.257800 -2.639571  
1 -1.008442 2.526162 -1.835845  
1 -1.190444 3.932576 -0.749823  
1 -1.334257 2.272921 -0.103531  
1 2.085686 3.399058 1.048526  
1 0.445990 2.950565 1.598473  
1 0.731633 4.549481 0.858883  
1 0.367803 0.799525 -0.541084  
6 1.250946 -1.787588 2.102111  
6 1.624525 -0.699779 2.888699  
6 -0.002872 -1.800325 1.500747  
6 -0.889152 -0.742797 1.703556  
6 -0.544063 0.342056 2.525473  
6 0.734253 0.350057 3.094455  
1 1.943540 -2.618955 1.940526  
1 2.617756 -0.669241 3.347068  
1 -0.303018 -2.635443 0.857627  
6 -2.262947 -0.806504 1.112532  
6 -1.532198 1.427967 2.820218  
1 1.027885 1.197761 3.723479

|   |           |           |           |   |           |           |           |
|---|-----------|-----------|-----------|---|-----------|-----------|-----------|
| 8 | -3.209245 | -1.247409 | 1.739448  | 1 | -2.632417 | 0.682239  | 1.907155  |
| 7 | -2.426168 | -0.213105 | -0.120382 | 1 | -2.724899 | 2.096308  | -0.179358 |
| 6 | -3.485839 | -0.538925 | -1.076467 | 1 | -4.238648 | 1.269128  | -0.645106 |
| 1 | -1.059083 | 2.281227  | 3.329883  | 1 | -2.868157 | 1.323312  | -1.782016 |
| 1 | -2.337747 | 1.057080  | 3.477070  | 1 | -2.756338 | -2.211243 | -0.522814 |
| 6 | -4.799722 | -0.045375 | -0.458275 | 1 | -2.863948 | -1.189287 | -1.983169 |
| 6 | -3.536523 | -2.031200 | -1.371907 | 1 | -4.252455 | -1.296791 | -0.866956 |
| 6 | -3.239629 | 0.258119  | -2.352210 | 1 | -0.775233 | 0.798674  | -0.747261 |
| 1 | -5.073879 | -0.620512 | 0.435131  | 9 | 0.230247  | 2.459690  | -0.448978 |
| 1 | -5.601698 | -0.142782 | -1.208965 |   |           |           |           |
| 1 | -4.720869 | 1.018585  | -0.179433 |   |           |           |           |
| 1 | -3.134455 | 1.331942  | -2.126808 |   |           |           |           |
| 1 | -4.096105 | 0.133634  | -3.034181 |   |           |           |           |
| 1 | -2.332943 | -0.076716 | -2.877139 |   |           |           |           |
| 1 | -3.752352 | -2.615637 | -0.464081 |   |           |           |           |
| 1 | -2.575423 | -2.373996 | -1.789382 |   |           |           |           |
| 1 | -4.325696 | -2.248734 | -2.110177 |   |           |           |           |
| 1 | -2.027345 | 1.805367  | 1.909406  |   |           |           |           |
| 9 | -0.973272 | -0.501379 | -0.982416 |   |           |           |           |

---

**Structure S134. 14**

---

|   |           |           |           |
|---|-----------|-----------|-----------|
| 6 | 3.413019  | -1.404673 | -0.400065 |
| 6 | 3.942361  | -0.128618 | -0.227640 |
| 6 | 2.047878  | -1.611575 | -0.240476 |
| 6 | 1.187053  | -0.553765 | 0.064208  |
| 6 | 1.720453  | 0.737104  | 0.258577  |
| 6 | 3.098484  | 0.924665  | 0.107818  |
| 1 | 4.066903  | -2.244442 | -0.652212 |
| 1 | 5.015754  | 0.046092  | -0.343514 |
| 1 | 1.617490  | -2.611153 | -0.347681 |
| 6 | -0.267355 | -0.916094 | 0.227052  |
| 6 | 0.888999  | 1.920944  | 0.651200  |
| 1 | 3.514446  | 1.925059  | 0.268709  |
| 8 | -0.585692 | -1.977967 | 0.740529  |
| 7 | -1.148759 | -0.003748 | -0.247110 |
| 6 | -2.614237 | -0.076885 | -0.131173 |
| 1 | 1.529103  | 2.714677  | 1.069206  |
| 1 | 0.124099  | 1.660481  | 1.402768  |
| 6 | -3.017869 | -0.179940 | 1.335683  |
| 6 | -3.151214 | -1.264544 | -0.920872 |
| 6 | -3.140290 | 1.225854  | -0.716671 |
| 1 | -2.628137 | -1.101071 | 1.793144  |
| 1 | -4.116643 | -0.184064 | 1.429588  |
